# Supplementary material
Source: publisher figshare collection journal article supplement (https://gsajournals.figshare.com/ndownloader/files/12298199)
Supplement: Supplementary file 1 [file 12298199]

## Sheet: Genotype counts (sub-sampled)
FBgn	CGnum	Chrom	Length	S26_1	S26_2	S58_1	S58_2	Z418_1	Z418_2	S26_S58_1	S26_S58_2	S26_Z418_1	S26_Z418_2	S58_Z418_1	S58_Z418_2	log2(S58/S26)	padj(S58/S26)	log2(Z418/S26)	padj(Z418/S26)	log2(Z418/S58)	padj(Z418/S58)	log2(S26S58/S26)	padj(S26S58/S26)	log2(S26S58/S58)	padj(S26S58/S58)	log2(S26Z418/S26)	padj(S26Z418/S26)	log2(S26Z418/Z418)	padj(S26Z418/Z418)	log2(S58Z418/S58)	padj(S58Z418/S58)	log2(S58Z418/Z418)	padj(S58Z418/Z418)	log2(S26Z418/S26S58)	padj(S26Z418/S26S58)	log2(S58Z418/S26S58)	padj(S58Z418/S26S58)	log2(S58Z418/S26Z418)	padj(S58Z418/S26Z418)	log2(S58Z418/S26)	padj(S58Z418/S26)	log2(S26Z418/S58)	padj(S26Z418/S58)	log2(S26S58/Z418)	padj(S26S58/Z418)
FBgn0000008	CG6741	2R	5173	96	92	120	167	928	1227	93	100	334	474	681	580	0.416867	0.281495	3.16754	7.85574e-42	2.69856	7.90553e-35	-0.0330086	0.98257	-0.317903	0.652815	1.60932	2.90046e-07	-1.21605	1.50442e-06	1.65706	4.47411e-20	-0.642601	0.00641403	1.47539	1.86162e-07	2.14357	8.69936e-31	0.55476	0.123878	2.42358	2.57185e-29	1.15144	0.000208026	-3.0971	4.59764e-43
FBgn0000017	CG4032	3L	12564	2222	1741	4107	3495	1456	1532	3049	1742	1636	2082	2362	2645	0.774981	1.19051e-05	-0.488003	0.0263783	-1.27746	4.30887e-21	0.148075	0.878427	-0.433392	0.198598	-0.264613	0.384105	0.211277	0.61189	-0.525777	0.000257223	0.655298	3.36774e-05	-0.379265	0.48679	0.0260342	0.996169	0.44194	0.0687536	0.213792	0.474164	-1.0332	3.71433e-11	0.615959	0.0518918
FBgn0000018	CG6093	2L	1794	277	279	289	274	270	297	288	329	322	270	335	324	-0.10977	0.744564	-0.0702572	0.856484	0.0395113	0.917882	0.0576224	0.957938	0.145488	0.992292	-0.0766593	0.896155	-0.00697838	0.993666	0.209076	0.579347	0.163281	0.837341	-0.121973	0.902776	0.0522674	0.994746	0.154785	0.877314	0.122617	0.759356	0.0252562	0.962604	0.129329	0.806546
FBgn0000024	CG17907	3R	7980	201	228	962	885	3207	1929	922	840	1629	1509	1225	1416	1.88087	2.81357e-27	3.21056	2.70095e-43	1.39732	4.26061e-12	1.7048	2.36152e-20	-0.0142895	0.998294	2.47546	4.70212e-31	-0.641063	0.0399114	0.483207	0.00205947	-0.764027	0.000881653	0.66265	0.00407405	0.487026	0.0225737	-0.172605	0.77446	2.3598	1.43813e-36	0.675252	0.000349211	-1.36563	3.95413e-09
FBgn0000032	CG7899	3R	1944	321	319	277	286	339	309	245	328	352	527	338	270	-0.302242	0.236426	-0.0845909	0.804801	0.219117	0.397117	-0.197714	0.793208	0.0577701	0.998294	0.228661	0.613026	0.281347	0.645305	0.106766	0.882908	-0.087331	0.952171	0.383779	0.529011	0.0401741	0.996169	-0.334781	0.603965	-0.173291	0.672941	0.49664	0.152797	-0.138091	0.802964
FBgn0000042	CG4027	X	2863	73446	99586	70670	72801	68098	75074	57120	85591	53303	56112	74761	76896	-0.388991	0.0684737	-0.358764	0.172898	0.0288657	0.90176	-0.291091	0.592117	0.0362793	0.998294	-0.798788	0.000246172	-0.439833	0.0147473	0.0985003	0.672797	0.0570798	0.956629	-0.424277	0.274309	0.0434184	0.994746	0.505956	2.84516e-05	-0.289199	0.323265	-0.433397	6.62307e-06	0.0147434	0.982817
FBgn0000043	CG12051	2R	1626	229	120	158	207	193	136	85	84	81	636	82	102	-0.0547057	0.930735	-0.166742	0.759599	-0.113948	0.798325	-0.749571	0.0391802	-0.67728	0.00793139	0.213044	0.74406	0.163816	0.82837	-0.639842	0.0138374	-0.57954	0.0746493	0.680345	0.179201	0.0603215	0.994746	-0.50479	0.299127	-0.839871	0.0340954	0.384793	0.504449	-0.796236	0.0154321
FBgn0000044	CG10067	2R	1724	2005	1973	1460	1920	1492	1648	1928	2285	1674	1671	1117	1855	-0.352915	0.100728	-0.428634	0.0310114	-0.07076	0.818682	0.000865561	0.998626	0.299107	0.457182	-0.41506	0.0574883	0.0133324	0.98642	-0.121755	0.872249	-0.0777752	0.961496	-0.393539	0.211997	-0.402953	0.376929	-0.0909974	0.938002	-0.486533	0.126681	-0.0586196	0.88016	0.416729	0.0870695
FBgn0000046	CG18290	3R	1853	204	212	175	223	133	160	193	267	154	165	140	210	-0.181656	0.630335	-0.557483	0.0757604	-0.367052	0.278821	0.0503094	0.968984	0.173814	0.982342	-0.481148	0.270391	0.0293518	0.98169	-0.109433	0.906764	0.158123	0.891953	-0.457084	0.442022	-0.290262	0.776607	0.118341	0.92945	-0.321238	0.463697	-0.295414	0.532714	0.576941	0.109716
FBgn0000052	CG9127	2L	4337	771	805	676	641	494	493	659	878	692	892	721	603	-0.380452	0.0370896	-0.75122	7.44755e-05	-0.372968	0.0356854	-0.100512	0.908561	0.219054	0.835956	-0.172646	0.625583	0.521733	0.0804707	0.0270082	0.96896	0.348344	0.231298	-0.0557781	0.957489	-0.198492	0.87923	-0.161675	0.835806	-0.345741	0.181526	0.194392	0.530898	0.607624	0.0176205
FBgn0000053	CG31628	2L	4718	439	512	562	486	449	414	572	559	570	570	430	485	0.00442243	0.989696	-0.235962	0.40768	-0.241307	0.284338	0.1449	0.834033	0.136339	0.980694	0.0692052	0.88683	0.284161	0.537656	-0.147571	0.753695	0.0583611	0.965228	-0.077918	0.927587	-0.292069	0.475463	-0.219562	0.728839	-0.160319	0.669746	0.066859	0.873504	0.38957	0.101929
FBgn0000054	CG15845	2R	1795	697	489	623	718	771	595	725	687	780	907	646	642	0.0429252	0.917549	0.0891399	0.820478	0.048342	0.880004	0.144326	0.855228	0.107487	0.998294	0.290434	0.442454	0.201108	0.712592	-0.0311375	0.964127	-0.0844528	0.944529	0.137261	0.822103	-0.145248	0.904689	-0.289387	0.498534	0.00729143	0.990943	0.258184	0.359822	0.0693996	0.889187
FBgn0000055	CG3481	2L	2080	123235	118307	32107	39390	37983	40191	61678	81684	82540	73063	37133	38365	-1.83364	5.35364e-39	-1.68582	5.5815e-32	0.155195	0.454222	-0.732854	0.000551688	0.855471	1.1404e-06	-0.778854	1.86e-05	0.85145	4.31434e-07	0.0918585	0.846564	-0.0648367	0.944529	0.0180667	0.986164	-0.818359	2.20601e-05	-0.910243	2.9287e-09	-1.74363	4.89078e-42	1.01977	3.79741e-10	0.836221	5.62609e-05
FBgn0000056	CG3484	2L	2080	19194	18782	4961	6378	5921	6175	9713	13058	13649	12324	6137	6080	-1.81089	3.30374e-32	-1.70968	1.56745e-33	0.119562	0.622808	-0.715815	0.00112875	0.83335	7.59835e-06	-0.698071	0.000135783	0.953811	3.68854e-09	0.115435	0.802264	-0.00450519	0.995323	0.0805838	0.920943	-0.787865	9.19194e-05	-0.951187	3.17649e-10	-1.7022	3.15067e-39	1.07945	5.71459e-10	0.869461	3.62472e-05
FBgn0000057	CG5124	2R	2291	745	756	1010	1096	1306	1046	1014	940	1279	1220	1172	1049	0.343367	0.0564945	0.518126	0.0101832	0.178294	0.389057	0.268708	0.410799	-0.0498386	0.998294	0.51867	0.0377574	0.0167277	0.984397	0.0897904	0.860533	-0.0843478	0.937036	0.232461	0.603868	0.136633	0.91707	-0.101456	0.902117	0.431263	0.0417481	0.188402	0.485928	-0.229398	0.445794
FBgn0000064	CG6058	3R	2636	42030	50157	45863	44998	41993	45344	42392	48264	41195	38108	42447	44594	-0.152034	0.476626	-0.175295	0.499236	-0.0244766	0.913941	-0.0963632	0.896301	0.0447618	0.998294	-0.380133	0.118202	-0.19807	0.581758	-0.0374927	0.928203	-0.0231641	0.984837	-0.26934	0.442742	-0.0824288	0.978322	0.174239	0.661881	-0.190448	0.487049	-0.233854	0.181266	0.0698893	0.869593
FBgn0000075	CG10501	2L	1792	46	31	59	70	30	26	55	55	52	25	44	34	0.478243	0.332773	-0.423033	0.477057	-0.90748	0.0238583	0.254802	0.793208	-0.0916435	0.998294	-0.0791426	0.933524	0.129174	0.915645	-0.345333	NA	0.206844	0.844994	-0.237561	NA	-0.281894	0.81963	0.0165831	0.992539	-0.066275	0.943995	-0.374633	0.522269	0.728026	0.119387
FBgn0000077	CG12127	X	1422	300	275	354	346	407	376	369	316	391	421	335	343	0.142429	0.640388	0.322884	0.227929	0.181632	0.461054	0.144523	0.850866	0.016218	0.998294	0.280011	0.47263	-0.0194678	0.984397	-0.0197163	0.977541	-0.193032	0.722444	0.121068	0.891654	-0.0380238	0.994746	-0.165768	0.835768	0.116277	0.774456	0.147348	0.708974	-0.15925	0.710433
FBgn0000083	CG5730	3R	1457	11104	12019	8981	9837	12472	11253	8846	10779	9460	8800	8967	9725	-0.421632	0.0039443	-0.0689931	0.778515	0.355468	0.00275729	-0.285407	0.400227	0.0983855	0.998294	-0.500736	0.0139034	-0.420108	0.0336911	0.0119955	0.979186	-0.336369	0.0403369	-0.184529	0.707185	-0.0906148	0.978322	0.0801936	0.905139	-0.407644	0.0249512	-0.0856722	0.736592	-0.236725	0.406442
FBgn0000084	CG9579	X	1247	204	220	215	223	137	113	182	207	123	213	111	181	-0.0817288	0.840388	-0.80379	0.00431911	-0.719295	0.0040989	-0.169902	0.832198	-0.0887046	0.998294	-0.429592	0.390968	0.213327	0.826318	-0.373662	0.314522	0.135073	0.924501	-0.223133	0.810847	-0.30127	0.759356	-0.0710524	0.961648	-0.56538	0.136709	-0.341657	0.484049	0.586907	0.0663455
FBgn0000097	CG3166	2L	4936	1295	1270	1378	1424	2006	1318	1378	1765	1503	1534	1401	1104	-0.00631506	0.98258	0.245321	0.415833	0.252938	0.310081	0.185675	0.748701	0.182494	0.887855	0.0559607	0.876924	-0.169085	0.796824	-0.120048	0.81068	-0.332484	0.400602	-0.134408	0.843705	-0.292508	0.618826	-0.189801	0.760798	-0.139678	0.68945	0.06455	0.819197	-0.0440262	0.950138
FBgn0000100	CG7490	3L	1328	31573	33578	32054	34510	28593	28343	31059	27477	29078	27068	29399	32266	-0.101406	0.600909	-0.292501	0.103456	-0.192386	0.151775	-0.22009	0.518642	-0.121978	0.963419	-0.381053	0.070585	-0.0867787	0.873669	-0.0826024	0.818821	0.0900194	0.882058	-0.146168	0.756296	0.0401864	0.994746	0.174492	0.675072	-0.187878	0.423495	-0.281345	0.102157	0.0577876	0.880244
FBgn0000108	CG7727	X	6331	48	28	33	27	30	26	28	32	25	46	35	35	-0.331766	0.587987	-0.400708	0.515381	-0.0503846	0.949113	-0.21103	NA	0.0188599	0.998294	-0.150139	0.855859	0.0852689	0.943091	0.0992413	NA	0.136577	0.929144	0.0456259	NA	0.0884428	0.994607	0.0160605	0.992539	-0.160543	0.837001	0.0779365	0.916655	0.0823722	0.941821
FBgn0000109	CG18315	3L	924	794	866	997	1090	1070	1111	976	1132	990	978	1048	1192	0.188964	0.396287	0.278936	0.231419	0.091462	0.691173	0.231988	0.600695	0.0574819	0.998294	0.0569989	0.893494	-0.201728	0.649338	0.111785	0.799052	0.0169909	0.99258	-0.178233	0.760302	0.0477492	0.994746	0.213515	0.677409	0.302189	0.229331	-0.124804	0.678704	-0.0267465	0.962065
FBgn0000115	CG6025	3L	863	1283	1270	995	1034	974	1079	1007	1257	1100	1129	1100	1097	-0.453171	0.0031759	-0.401619	0.0571799	0.0475735	0.863395	-0.224536	0.632705	0.176565	0.90645	-0.361931	0.141608	0.03697	0.963424	0.12655	0.70084	0.0687869	0.954106	-0.110152	0.886235	-0.0650218	0.994439	0.0322018	0.970423	-0.318645	0.122324	0.0822728	0.78305	0.149448	0.738368
FBgn0000116	CG32031	3L	2415	14123	21140	19519	20798	19426	20380	15816	18226	15562	15744	22126	20980	0.052741	0.890305	0.0645047	0.871341	0.0125675	0.958393	-0.113374	0.900202	-0.1712	0.81286	-0.331242	0.312045	-0.40026	0.0268173	0.113039	0.663267	0.0883811	0.892185	-0.207367	0.57636	0.277467	0.385535	0.489456	0.00070826	0.159231	0.698106	-0.403754	0.000769602	-0.195628	0.519719
FBgn0000117	CG11579	X	3220	8245	8281	7472	7450	7553	6513	8179	8645	8182	8849	6910	6935	-0.27658	0.038534	-0.33283	0.0531491	-0.0578153	0.74558	-0.0528794	0.936633	0.208379	0.407287	-0.139346	0.531777	0.192064	0.495728	-0.0813086	0.779286	-0.0352324	0.975089	-0.0808738	0.874064	-0.288587	0.219527	-0.229506	0.332912	-0.359139	0.0327546	0.137542	0.34385	0.272335	0.198028
FBgn0000119	CG5912	2R	6024	1359	1286	1756	1827	1422	1472	1678	1506	1547	1667	1390	1593	0.296807	0.0637434	0.0254681	0.933758	-0.270818	0.0772403	0.168087	0.7261	-0.10672	0.992292	0.0903921	0.771555	0.0681528	0.918199	-0.221291	0.314323	0.0217424	0.988513	-0.0815536	0.896905	-0.111315	0.958442	-0.0457603	0.955557	0.0571409	0.86908	-0.200028	0.309542	0.149762	0.655848
FBgn0000139	CG6677	3R	1949	552	398	582	544	712	557	743	548	697	747	477	561	0.106462	0.765488	0.290051	0.362438	0.18899	0.426243	0.293567	0.573452	0.195659	0.902155	0.378421	0.294158	0.0996779	0.904136	-0.081915	0.900944	-0.25699	0.537942	0.0523058	0.958292	-0.278256	0.670824	-0.356835	0.392108	0.0147984	0.98306	0.287425	0.278588	0.0450756	0.94481
FBgn0000150	CG2210	3R	727	16120	14570	16071	17351	13150	14000	14672	13861	13734	14731	14739	16228	-0.0100017	0.967322	-0.271237	0.177316	-0.26253	0.0704998	-0.174309	0.655738	-0.162746	0.728154	-0.285449	0.142787	-0.00939567	0.98758	-0.082201	0.826864	0.155483	0.712787	-0.100493	0.806244	0.0797462	0.978322	0.169405	0.593057	-0.0971849	0.731038	-0.276167	0.0299225	0.086858	0.812151
FBgn0000152	CG9703	X	2575	366	319	579	529	559	488	477	453	426	465	449	447	0.534398	0.00940888	0.481794	0.0389745	-0.0525675	0.855522	0.312971	0.392303	-0.170255	0.911298	0.174497	0.673228	-0.265782	0.582871	-0.247866	0.363593	-0.210212	0.629065	-0.142544	0.843705	-0.0736609	0.994439	0.0556059	0.956778	0.258091	0.401891	-0.334747	0.240621	-0.139006	0.729135
FBgn0000163	CG5055	X	15831	3288	3214	3297	3083	2284	2200	3480	2945	2671	2663	2674	2482	-0.15809	0.358951	-0.625938	4.6384e-05	-0.470662	6.42298e-05	-0.0924709	0.891725	0.0544512	0.998294	-0.451503	0.0220285	0.165464	0.652608	-0.264581	0.097064	0.169923	0.632829	-0.338876	0.270074	-0.309719	0.296076	0.00643297	0.994789	-0.43367	0.0135474	-0.295788	0.0837409	0.515293	0.00563376
FBgn0000173	CG18319	X	2003	3850	3552	4790	4949	4391	4499	4531	4012	4406	4498	4551	4777	0.257026	0.0836613	0.156487	0.479803	-0.099113	0.562556	0.113459	0.846827	-0.125151	0.955089	0.0791289	0.778859	-0.0693496	0.90232	-0.0374187	0.932848	0.0466716	0.963404	-0.0375568	0.957299	0.0874666	0.974662	0.115872	0.804541	0.213299	0.325607	-0.173481	0.301961	-0.0365661	0.936093
FBgn0000179	CG3578	X	5613	47	49	71	69	86	95	72	59	63	43	64	71	0.336969	0.495429	0.693043	0.0899935	0.343797	0.412903	0.233662	0.807656	-0.0241765	0.998294	-0.0181738	0.987865	-0.422242	0.532494	-0.0173704	0.982925	-0.283465	0.689406	-0.193081	NA	0.00775248	0.996482	0.166951	0.888513	0.302483	0.606322	-0.25521	0.689259	-0.366376	0.503244
FBgn0000181	CG3644	2R	1474	7581	8024	8531	8729	7295	7574	8217	8590	7534	9324	7544	8618	0.0106256	0.965212	-0.169103	0.440925	-0.180774	0.215585	0.0219334	0.980573	0.0128245	0.998294	-0.0775065	0.786698	0.0929182	0.862398	-0.0676269	0.875743	0.0918714	0.894588	-0.0964706	0.855936	-0.0803334	0.978322	0.000332378	0.999519	-0.0619718	0.846746	-0.0868232	0.674391	0.189188	0.477884
FBgn0000183	CG6605	2L	5361	4550	3989	3916	4094	4758	4144	4219	4664	4891	5260	4069	3898	-0.220035	0.196109	-0.0458462	0.866983	0.175814	0.22189	-0.0222149	0.981991	0.182486	0.703121	0.0613493	0.840808	0.109402	0.791466	0.0143689	0.976461	-0.162385	0.646243	0.0841128	0.883038	-0.171204	0.805816	-0.274928	0.23409	-0.205577	0.38162	0.284433	0.0362521	0.0206341	0.967281
FBgn0000212	CG5942	3L	5553	2939	2695	3551	3453	3563	2684	3544	3458	3440	3542	3240	2767	0.176631	0.295021	0.0364907	0.909523	-0.137557	0.512013	0.213604	0.521901	0.047624	0.998294	0.120048	0.654594	0.0828431	0.9062	-0.181021	0.48139	-0.0589719	0.964094	-0.098957	0.836416	-0.225027	0.648576	-0.145257	0.793259	-0.0197067	0.964499	-0.0520768	0.820602	0.181833	0.589842
FBgn0000221	CG4934	X	1450	125	143	128	125	133	120	128	146	159	162	103	129	-0.196265	0.63563	-0.173592	0.68547	0.0250659	0.96117	-0.0397314	0.976339	0.113642	0.998294	0.0601655	0.935555	0.188822	0.84487	-0.0700655	0.941621	-0.10077	0.953278	0.0909153	0.939502	-0.193623	0.917254	-0.261668	0.764664	-0.282459	0.55553	0.232039	0.652449	0.121406	0.849822
FBgn0000228	CG14025	2L	4666	891	861	1129	1242	1305	1320	1134	906	1120	1424	1097	1255	0.293596	0.108125	0.464131	0.0136004	0.172162	0.360022	0.119632	0.868902	-0.139657	0.979317	0.325642	0.247126	-0.115528	0.857032	0.00965364	0.985167	-0.159278	0.751766	0.187511	0.755226	0.149369	0.920156	-0.0450472	0.961648	0.297241	0.213045	0.0429209	0.899291	-0.324428	0.227376
FBgn0000229	CG5680	2L	1797	2256	2358	2374	2375	2325	2219	2288	2237	2397	2100	2169	2229	-0.0908292	0.657428	-0.124864	0.581961	-0.0341467	0.867616	-0.103029	0.865381	-0.0163726	0.998294	-0.204939	0.498565	-0.0768087	0.916435	-0.0828169	0.813563	-0.059903	0.946819	-0.0949232	0.892325	-0.0665263	0.984211	0.0174403	0.98768	-0.177554	0.468821	-0.115515	0.698745	0.0150355	0.973545
FBgn0000239	CG9242	2L	3116	2564	2365	3339	3241	2862	2821	2995	2781	2833	3345	3130	3005	0.277141	0.0650487	0.098229	0.679271	-0.178534	0.209811	0.134348	0.801807	-0.125072	0.930009	0.131208	0.626634	0.0385676	0.949594	-0.0734569	0.848317	0.0859008	0.892452	-0.00715189	0.996197	0.0514443	0.994439	0.046993	0.947123	0.195824	0.395686	-0.140345	0.461611	0.0423253	0.919886
FBgn0000241	CG17632	2R	2738	1044	786	856	884	818	760	847	1354	1213	916	963	762	-0.195256	0.466369	-0.303319	0.257684	-0.109714	0.599852	0.148217	0.877857	0.283387	0.68303	0.0403604	0.947688	0.307702	0.537656	0.00957595	0.987984	0.0965477	0.927968	-0.10976	0.917889	-0.282697	0.761781	-0.197844	0.811881	-0.182194	0.639183	0.224673	0.544181	0.450633	0.193426
FBgn0000244	CG9379	3R	4774	4452	4238	6603	6559	6074	5792	6227	4570	5603	5386	6086	6852	0.456655	0.000228315	0.336034	0.0446708	-0.118898	0.398319	0.200619	0.711956	-0.196817	0.840273	0.149922	0.562651	-0.172537	0.611495	-0.00209324	0.998412	0.0991171	0.868923	-0.0635205	0.937652	0.195232	0.841725	0.267161	0.392108	0.444755	0.0120664	-0.297575	0.0618613	-0.109106	0.810208
FBgn0000246	CG17604	3R	2629	39	41	130	98	137	89	105	65	109	181	116	100	1.14246	0.00121544	1.16426	0.00215096	0.00742649	0.989484	0.610401	0.161846	-0.19709	0.978811	1.14957	0.0126775	0.163958	0.886529	-0.0348813	0.972973	-0.0488653	0.98041	0.379184	0.620469	0.194816	0.931603	-0.198199	0.853628	1.08197	0.00285287	0.198141	0.7488	-0.302987	0.636074
FBgn0000247	CG31037	3R	7026	1762	1683	2097	2046	2275	2063	2018	1773	2137	2082	2044	2001	0.129356	0.497834	0.219906	0.274901	0.0923905	0.592876	0.0496649	0.949059	-0.0687988	0.998294	0.104183	0.734317	-0.104089	0.849288	-0.0107889	0.980837	-0.108367	0.844994	0.0515057	0.945443	0.0568323	0.994439	-0.00524296	0.997548	0.114052	0.681448	-0.0201385	0.945711	-0.165018	0.587843
FBgn0000250	CG5848	2L	2356	2008	2157	1951	1932	2434	2205	1830	2125	1886	2956	1937	2058	-0.230097	0.181281	0.0465666	0.864597	0.279189	0.0304339	-0.14138	0.816807	0.0698093	0.998294	0.0161401	0.977542	-0.0216059	0.981598	0.0596857	0.897289	-0.21459	0.414856	0.151817	0.83472	-0.015867	0.996169	-0.17449	0.812816	-0.168564	0.523167	0.234215	0.460469	-0.196312	0.521924
FBgn0000251	CG1759	2L	2570	18552	13619	17626	17831	18849	15460	18012	16993	19513	17866	19918	16269	0.00824555	0.98126	-0.0140316	0.970189	-0.0219062	0.920812	0.0359701	0.971053	0.0309454	0.998294	0.0351728	0.939893	0.0519193	0.940815	0.0481134	0.932848	0.0564559	0.964094	-0.00183617	0.999109	0.0155496	0.996169	0.00647419	0.996008	0.0551162	0.901771	0.0301788	0.911373	0.0519139	0.900726
FBgn0000253	CG8472	2R	5672	18353	18024	14774	16101	13778	15447	14591	16493	12766	15478	14466	16028	-0.363198	0.00719725	-0.404604	0.0345408	-0.0451666	0.853273	-0.283724	0.314294	0.05586	0.998294	-0.538207	0.00112669	-0.123348	0.795113	0.00422249	0.993378	0.0360516	0.976538	-0.229066	0.515025	-0.0540686	0.994439	0.160063	0.68966	-0.357334	0.0450993	-0.178231	0.296844	0.102037	0.806546
FBgn0000256	CG3399	2L	4537	692	785	1318	1270	217	156	1248	910	571	671	551	819	0.651341	8.46418e-05	-1.97399	6.97698e-20	-2.64471	7.99213e-59	0.392233	0.265143	-0.171853	0.949853	-0.408066	0.171822	1.34011	5.77208e-08	-0.724199	0.000188626	1.3833	1.40528e-10	-0.770513	0.00449775	-0.518201	0.125663	0.154594	0.870659	-0.205217	0.621156	-1.05339	5.33448e-11	2.30403	4.20708e-25
FBgn0000257	CG12230	X	3173	731	805	938	930	1039	998	881	794	925	1049	901	941	0.14257	0.545779	0.290502	0.193932	0.150185	0.416835	0.0360808	0.970628	-0.0931256	0.998294	0.162068	0.628173	-0.112467	0.852589	0.00236881	0.998545	-0.147952	0.761814	0.121177	0.848966	0.0945019	0.977672	-0.0366295	0.968684	0.140422	0.659417	0.026115	0.936575	-0.248919	0.346446
FBgn0000259	CG15224	X	3121	2904	2579	2852	2832	3410	3366	2893	2689	3302	3718	2950	2945	-0.0794647	0.713979	0.195762	0.365362	0.278352	0.0266497	-0.0522354	0.941516	0.0234178	0.998294	0.162537	0.523832	-0.025606	0.965149	0.0714485	0.848317	-0.203848	0.426878	0.214383	0.517322	0.0438583	0.994746	-0.181318	0.593057	-0.0082644	0.985766	0.246286	0.0984385	-0.24953	0.258059
FBgn0000261	CG6871	3L	1993	102380	100140	91334	91443	113020	105727	88006	95352	97781	97789	93594	101256	-0.277502	0.0279135	0.00491442	0.985447	0.284088	0.00522565	-0.209301	0.526164	0.0526011	0.998294	-0.22746	0.266497	-0.224662	0.331615	0.1095	0.639482	-0.172711	0.529811	-0.0069981	0.996197	0.0508871	0.994439	0.047184	0.941039	-0.164938	0.465933	0.0486841	0.804365	-0.223737	0.318875
FBgn0000273	CG4379	2L	5312	5017	4824	5446	5331	4662	4207	5161	5415	4547	5105	5430	4701	-0.00278342	0.989601	-0.251089	0.16442	-0.249646	0.035961	0.0198492	0.98257	0.0231816	0.998294	-0.209055	0.328305	0.0436866	0.940295	-0.0606346	0.910831	0.160693	0.71034	-0.223243	0.465205	-0.0835343	0.978393	0.119337	0.831251	-0.068925	0.83001	-0.20648	0.140698	0.26755	0.194172
FBgn0000283	CG6384	3R	4176	1824	1837	2029	2079	2393	2222	1999	2126	2182	2985	2178	2118	0.0313009	0.898337	0.221759	0.264539	0.192598	0.174606	0.0820106	0.902371	0.0528445	0.998294	0.285468	0.305471	0.0728508	0.920089	0.0820818	0.829116	-0.111279	0.837765	0.194119	0.69647	0.0245584	0.996169	-0.178405	0.756058	0.112777	0.682975	0.257759	0.275735	-0.133716	0.669161
FBgn0000286	CG11924	2L	4231	1640	1222	1844	1776	1719	1697	1906	1348	1825	1868	1883	1755	0.198107	0.434446	0.145501	0.626387	-0.0528549	0.796935	0.0848164	0.928661	-0.0833407	0.998294	0.172164	0.623041	0.034806	0.960195	0.0281901	0.960262	0.0669862	0.944592	0.0734692	0.931504	0.108835	0.978322	0.032123	0.969752	0.221359	0.486489	-0.0192868	0.945777	-0.0475107	0.937175
FBgn0000289	CG8367	2R	5066	1995	1482	1744	1744	2092	1682	1888	2013	2122	2594	1908	1714	-0.121949	0.665395	0.00970935	0.980829	0.135011	0.487769	0.0749188	0.928661	0.193557	0.639937	0.233999	0.468086	0.223931	0.564312	0.0714963	0.882516	-0.0645365	0.956629	0.15448	0.752197	-0.123936	0.931343	-0.287898	0.415555	-0.0493085	0.909728	0.366215	0.0304567	0.0703433	0.869593
FBgn0000299	CG4145	2L	6101	336	229	148	134	135	274	102	86	31	71	64	200	-1.02339	0.000188116	-0.46682	0.318995	0.478638	0.260166	-1.2654	9.93501e-07	-0.346637	0.511251	-1.91833	8.46221e-07	-0.960983	0.0129377	-0.0318497	0.975565	-0.128094	0.895196	-0.482952	NA	0.200256	0.931343	0.439483	0.441368	-0.894533	0.0491737	-0.929365	0.0333385	-0.858811	0.0346349
FBgn0000307	CG5813	2L	6624	1149	975	1373	1280	1478	1295	1293	1128	1343	2250	1262	1333	0.181629	0.407941	0.268242	0.24079	0.0887274	0.663707	0.0947254	0.897775	-0.070886	0.998294	0.502753	0.135179	0.239418	0.675935	-0.00832068	0.985681	-0.101671	0.879404	0.379799	0.437935	0.0618445	0.994439	-0.318569	0.571214	0.16843	0.569364	0.332507	0.314343	-0.164741	0.61543
FBgn0000308	CG9553	2L	2091	6021	5989	6716	6923	7241	7052	6161	6718	5923	6324	6604	7109	0.0485176	0.816738	0.14248	0.487098	0.0954839	0.530521	0.0168629	0.986501	-0.0276777	0.998294	-0.153432	0.495649	-0.285778	0.144803	0.0288113	0.95176	-0.0725752	0.919913	-0.165231	0.657373	0.0532067	0.994439	0.208486	0.455566	0.0747593	0.794446	-0.20133	0.149548	-0.123585	0.698062
FBgn0000316	CG2945	X	2110	1205	1196	1138	1124	1176	1145	1024	1089	1141	1379	1287	1193	-0.21452	0.235702	-0.149747	0.523361	0.0649416	0.76212	-0.243044	0.483913	-0.0409968	0.998294	-0.114533	0.72147	0.035511	0.962503	0.143004	0.63773	0.0710412	0.944529	0.134605	0.814287	0.178226	0.81613	0.0342564	0.970423	-0.0646074	0.843779	0.0967881	0.734215	-0.108618	0.768214
FBgn0000317	CG7595	2L	7404	4825	4607	5202	5392	3713	3429	5193	4254	3779	4157	3919	4525	0.0332093	0.881341	-0.495861	0.00142111	-0.532302	4.16202e-07	-0.0743112	0.921791	-0.100859	0.998294	-0.422246	0.0187861	0.0723722	0.885026	-0.282589	0.0793994	0.205754	0.499472	-0.326995	0.284319	-0.168737	0.867308	0.13645	0.779435	-0.263741	0.233443	-0.45756	5.75433e-05	0.404858	0.0532969
FBgn0000318	CG11024	2L	689	4970	4545	2949	3102	3996	4275	3561	3095	3909	3741	3475	3680	-0.769483	1.01437e-09	-0.295512	0.143121	0.471406	0.000399471	-0.548359	0.00436325	0.169401	0.809116	-0.476325	0.0187861	-0.173546	0.66192	0.248697	0.095548	-0.20961	0.490972	0.095377	0.878014	0.0664883	0.993888	-0.0392326	0.95851	-0.508003	0.00215319	0.280845	0.125249	-0.281312	0.25588
FBgn0000319	CG9012	X	5793	18751	19634	16534	15930	19826	19540	16702	17583	17454	18569	16540	17162	-0.369291	0.00465006	-0.0673114	0.778453	0.303415	0.00642251	-0.227946	0.460315	0.121393	0.918484	-0.270103	0.163142	-0.19606	0.4097	0.0734282	0.81236	-0.227517	0.277371	-0.0294285	0.962322	-0.0522622	0.994439	-0.0371415	0.948348	-0.293437	0.112724	0.0983336	0.520533	-0.171911	0.506069
FBgn0000326	CG9858	2R	1844	400	589	553	544	467	523	420	501	442	472	565	546	0.0116106	0.98009	-0.0953156	0.823379	-0.110767	0.689398	-0.150127	0.868902	-0.163977	0.963419	-0.264972	0.549012	-0.16471	0.814839	0.0366745	0.9584	0.125397	0.879404	-0.0967661	0.915746	0.201534	0.824182	0.288352	0.559407	0.0460411	0.934919	-0.288571	0.319973	-0.0782438	0.888047
FBgn0000330	CG3035	X	1774	340	388	499	519	608	675	427	503	548	516	566	519	0.332098	0.15593	0.677938	0.00329388	0.3508	0.0805761	0.230268	0.682273	-0.0639074	0.998294	0.327876	0.377838	-0.294661	0.537656	0.100734	0.855468	-0.225372	0.614466	0.0801924	0.9309	0.160499	0.90911	0.0688814	0.947123	0.432409	0.0967113	0.0158335	0.970558	-0.412182	0.140054
FBgn0000339	CG5855	2L	1132	2165	2183	2065	2100	2052	2061	2050	1841	1984	2095	2134	2244	-0.191985	0.253265	-0.179847	0.406447	0.0116997	0.96154	-0.224085	0.51806	-0.0421989	0.998294	-0.267338	0.25019	-0.0827227	0.884357	0.0888414	0.799795	0.0659854	0.944529	-0.0306131	0.966749	0.126242	0.914087	0.147886	0.743397	-0.100931	0.721728	-0.0774551	0.743695	-0.0575941	0.890209
FBgn0000352	CG1708	2R	4763	394	419	219	224	253	153	296	266	289	698	196	159	-0.956436	1.97605e-06	-1.02579	0.000221874	-0.0956831	0.83274	-0.532887	0.0467641	0.308292	0.481891	0.0531719	0.946855	0.711335	0.11592	-0.224065	0.634102	-0.137846	0.916942	0.451262	0.498071	-0.542057	0.072198	-0.766791	0.0452265	-1.20597	2.28105e-07	0.778162	0.0602358	0.43576	0.266569
FBgn0000370	CG8669	2L	2515	24980	25015	18758	18726	19460	17964	21004	22777	22824	21708	19153	19402	-0.540614	2.15477e-06	-0.513425	0.00045568	0.0254754	0.884407	-0.253684	0.363123	0.254594	0.204313	-0.337055	0.0976262	0.169867	0.60587	0.0609112	0.854496	0.0249069	0.979327	-0.0695058	0.910718	-0.197961	0.649794	-0.144264	0.729145	-0.475803	0.00182507	0.196664	0.252213	0.240596	0.2689
FBgn0000376	CG2714	X	3837	364	342	489	483	483	385	517	416	485	989	406	445	0.313431	0.159661	0.179133	0.559466	-0.132099	0.620548	0.273346	0.546133	-0.00654937	0.998294	0.713942	0.0752579	0.484685	0.349815	-0.14701	0.730181	-0.0359897	0.981149	0.394263	0.535723	-0.135906	0.956978	-0.479234	0.38099	0.146575	0.68685	0.426601	0.311577	0.118536	0.813926
FBgn0000377	CG3193	X	2332	633	580	766	765	650	589	670	721	700	762	682	617	0.195537	0.370718	-0.0731065	0.808104	-0.26934	0.124985	0.103099	0.890775	-0.0749636	0.998294	0.0772342	0.850531	0.145841	0.808779	-0.190689	0.524293	0.0462332	0.973858	-0.027959	0.977575	-0.113366	0.969017	-0.0970201	0.915945	-0.0136724	0.979841	-0.11051	0.722008	0.180215	0.598176
FBgn0000382	CG3954	X	7664	1306	1038	1656	1497	1629	1541	1545	1331	1496	1840	1463	1622	0.28374	0.186331	0.318351	0.169115	0.035754	0.877877	0.187541	0.734003	-0.0710845	0.998294	0.299125	0.317305	-0.00576238	0.99176	-0.0079509	0.987834	-0.0517745	0.960571	0.0988484	0.884259	0.062314	0.994439	-0.0466271	0.955557	0.269438	0.328672	0.0254259	0.936846	-0.113892	0.756682
FBgn0000384	CG17678	2L	2764	687	568	1049	891	983	868	854	698	901	1323	946	983	0.473384	0.0213419	0.435915	0.0480887	-0.0390581	0.888022	0.194035	0.739239	-0.223879	0.749648	0.572194	0.0633403	0.155953	0.819138	0.0132381	0.981974	0.0396734	0.975089	0.346849	0.479935	0.245728	0.653268	-0.115733	0.902436	0.482184	0.0286558	0.123625	0.755547	-0.218291	0.514576
FBgn0000392	CG11181	2L	4306	289	283	411	371	444	406	325	311	424	2337	371	458	0.300774	0.231652	0.443048	0.0649204	0.141997	0.586194	0.0602047	0.950367	-0.20103	0.855672	0.686337	0.221338	0.328207	0.565712	0.0880287	0.906858	-0.0446822	0.976538	0.431394	0.443675	0.289089	0.608852	-0.277573	0.627526	0.391055	0.184842	0.480298	0.323866	-0.370428	0.167904
FBgn0000394	CG12410	X	1893	88	112	127	125	190	232	91	120	158	186	144	154	0.174264	0.707934	0.875863	0.0064584	0.70399	0.0104001	-0.00417798	0.997631	-0.127184	0.998294	0.465488	0.356134	-0.27324	0.707751	0.191942	0.737293	-0.392231	0.32033	0.407401	0.547205	0.327049	0.660601	-0.100262	0.940841	0.400667	0.341338	0.313938	0.503755	-0.840986	0.00849363
FBgn0000395	CG15671	2R	4329	582	452	318	409	700	354	474	727	501	510	769	285	-0.596738	0.0170516	-0.0819067	0.874287	0.484014	0.158512	0.108699	0.91813	0.528823	0.0645535	-0.195087	0.635314	-0.0878516	0.940815	0.143723	0.838916	4.5097e-05	0.99981	-0.278264	0.680466	-0.0581888	0.994746	0.0648073	0.964812	-0.0452128	0.967678	0.375065	0.27193	0.187907	0.785497
FBgn0000405	CG3510	2R	2633	54	30	157	46	25	54	22	81	148	9422	25	353	0.744031	0.153177	-0.122236	0.874287	-0.813987	0.100618	0.0878953	0.947517	-0.208346	0.887465	0.418885	0.305471	0.210766	0.538627	0.0522352	0.913946	0.145075	0.732115	0.216278	0.570963	0.114073	0.90911	-0.119075	0.740946	0.386682	0.485161	0.285722	0.378619	0.2089	0.824674
FBgn0000406	CG13279	2L	1557	1371	936	2416	2412	315	416	3228	2180	948	731	582	1086	0.884718	1.22165e-05	-1.61595	1.99315e-10	-2.55913	3.03994e-52	0.92203	0.000315719	0.168783	0.971427	-0.55683	0.122854	0.875256	0.00466671	-0.707437	0.0087769	0.77831	0.00512165	-1.45389	6.39957e-09	-1.16249	3.30011e-06	0.0237389	0.988806	-0.50128	0.208798	-1.42638	1.28378e-12	2.58096	8.10589e-29
FBgn0000409	CG17903	2L	681	11041	14400	7400	7656	5513	6721	6933	9650	6369	5502	7377	6318	-0.857401	8.3931e-07	-1.0953	5.7897e-07	-0.255333	0.194606	-0.582455	0.0463655	0.156917	0.978811	-1.19144	5.01839e-08	-0.104206	0.888287	-0.104187	0.785891	0.120886	0.88636	-0.501468	0.15	-0.252414	0.74762	0.228116	0.637894	-0.94945	5.19977e-06	-0.367273	0.0650141	0.416103	0.188484
FBgn0000412	CG9745	3R	1811	1456	1505	1620	1581	1576	1646	1587	1540	1563	2172	1661	1670	-0.0214758	0.935791	0.0174331	0.956618	0.0394759	0.868211	-0.0045329	0.994795	0.0165042	0.998294	0.130896	0.707027	0.113669	0.873669	0.0751197	0.855988	0.0262794	0.983608	0.131267	0.836002	0.054797	0.994439	-0.0874482	0.928371	0.0535225	0.867476	0.153629	0.597007	-0.0226293	0.964079
FBgn0000414	CG9695	3L	8461	4613	5358	5910	5463	5885	6465	6066	5692	5839	5473	5434	6486	0.0527352	0.846228	0.197891	0.434692	0.147662	0.428186	0.138933	0.810639	0.0915632	0.99616	-0.00115684	0.998929	-0.185618	0.644456	0.0824621	0.862172	-0.0642343	0.956629	-0.142894	0.763698	-0.010628	0.996169	0.116091	0.855367	0.134959	0.682593	-0.0514265	0.853227	-0.0505555	0.911666
FBgn0000416	CG12070	3R	3440	41879	42662	42556	41508	61204	49593	45142	46819	55597	50744	43703	45847	-0.140131	0.370189	0.272506	0.162478	0.414862	0.000883365	0.0356616	0.964339	0.169424	0.61853	0.143644	0.591329	-0.116986	0.824803	0.10909	0.616275	-0.294643	0.165539	0.104902	0.845117	-0.0649528	0.982745	-0.18097	0.653529	-0.0304702	0.924311	0.284492	0.0985756	-0.232933	0.344045
FBgn0000422	CG10697	2L	2797	28	28	37	36	191	233	35	36	125	124	179	132	0.180389	0.790978	2.44128	5.72508e-15	2.2167	1.53221e-15	0.136589	NA	0.00490363	0.998294	1.34535	0.00242433	-0.592002	0.203168	1.22464	5.50311e-08	-0.333098	0.510801	0.988859	NA	1.29626	2.80207e-07	0.230745	0.811881	1.91328	6.51121e-09	1.14346	0.00298692	-2.1258	7.32353e-14
FBgn0000426	CG16792	2R	467	146	135	124	124	124	126	141	129	123	191	110	116	-0.284106	0.440083	-0.24906	0.52706	0.0374274	0.940913	-0.111176	0.915391	0.119187	0.998294	-0.0295161	0.970401	0.157213	0.887866	-0.07779	0.93251	-0.118883	0.934834	0.071419	0.957489	-0.211315	0.886699	-0.242008	0.803781	-0.379743	0.340231	0.207628	0.718157	0.115173	0.858532
FBgn0000442	CG3324	2L	2583	6947	6780	6864	7088	7127	6419	7411	8734	7798	6300	7212	6139	-0.10849	0.53285	-0.123459	0.553735	-0.0149055	0.941921	0.138233	0.812776	0.233608	0.493952	-0.130131	0.703239	-0.00718205	0.990027	-0.0367791	0.951126	-0.0329128	0.976891	-0.256524	0.594065	-0.266152	0.560797	-0.0244846	0.981893	-0.147776	0.600529	-0.0241133	0.947135	0.264597	0.295128
FBgn0000447	CG9741	3R	1472	938	992	1067	985	982	891	971	905	970	1066	1020	1047	-0.0448427	0.87365	-0.145839	0.55796	-0.101072	0.630318	-0.113176	0.863785	-0.0685428	0.998294	-0.104655	0.757666	0.0408873	0.958237	0.0305948	0.960262	0.114614	0.851349	0.0142507	0.989573	0.0978273	0.971685	0.0723077	0.92945	-0.015046	0.974073	-0.0592131	0.853471	0.0236889	0.962472
FBgn0000448	CG33183	2R	7524	28	33	67	30	25	29	40	34	21	25	24	31	0.364103	0.554365	-0.204518	0.768882	-0.541465	0.312603	0.103299	NA	-0.114543	0.998294	-0.286792	0.684542	-0.0976299	0.938091	-0.269279	NA	0.00211452	0.997636	-0.29476	NA	-0.207698	0.922963	0.0866311	0.944724	-0.179906	0.820444	-0.472398	0.388921	0.320982	0.67146
FBgn0000449	CG12028	3L	1975	48	47	24	49	31	33	52	56	24	27	35	26	-0.368247	0.531167	-0.532536	0.310562	-0.107858	0.881403	0.0643162	0.966734	0.22976	0.909628	-0.601052	0.32224	-0.139318	0.9062	-0.0795077	NA	-0.0376329	0.987176	-0.515725	NA	-0.431077	0.467435	0.0923347	0.942032	-0.551287	0.316791	-0.234077	0.719014	0.570923	0.270726
FBgn0000451	CG6611	3L	2426	47	28	40	42	34	31	52	52	37	32	22	51	-0.00165264	0.997737	-0.232112	0.727165	-0.229276	0.700131	0.220456	0.83084	0.183734	0.981432	-0.15508	0.849906	0.00639556	0.99441	-0.0520979	NA	0.0559776	0.976538	-0.311945	NA	-0.232492	0.896388	0.0361316	0.980357	-0.0960917	0.915941	-0.148096	0.837077	0.516603	0.345827
FBgn0000454	CG9285	3R	2047	19650	19470	19330	19821	16864	17238	19566	21518	19846	19459	18216	21087	-0.130688	0.412024	-0.294863	0.0968108	-0.165784	0.237268	-0.0108339	0.990457	0.111687	0.978811	-0.170946	0.453617	0.123491	0.752251	0.0260752	0.961278	0.169551	0.670218	-0.153692	0.710443	-0.0864735	0.978322	0.050261	0.944724	-0.103896	0.719866	-0.0405997	0.858953	0.277809	0.209751
FBgn0000455	CG5663	3R	1951	2814	2746	5848	6008	3500	3621	4654	4918	3593	3228	4957	5368	0.940275	5.14833e-16	0.246542	0.218474	-0.691219	1.21937e-09	0.6482	0.000112763	-0.23612	0.295705	0.10865	0.733159	-0.122924	0.824562	-0.167048	0.386706	0.475708	0.00232557	-0.538174	0.0166325	0.0707065	0.982707	0.589995	0.00197274	0.754305	7.0567e-07	-0.805549	7.11739e-08	0.428971	0.0203281
FBgn0000464	CG10443	2L	8637	657	595	898	866	931	855	899	794	814	823	785	841	0.349175	0.0588225	0.392315	0.0575483	0.0447766	0.853273	0.314656	0.325342	-0.00681608	0.998294	0.189021	0.576964	-0.179701	0.709699	-0.0860114	0.860533	-0.137315	0.812509	-0.132756	0.83472	-0.0786966	0.984211	0.0405977	0.966043	0.251573	0.339732	-0.147204	0.605267	-0.0525082	0.912853
FBgn0000473	CG9438	2R	1674	11340	12043	10350	11561	16213	13352	14299	14204	20980	15161	13162	13699	-0.222829	0.191233	0.22212	0.289001	0.446874	0.000841552	0.187356	0.607108	0.394287	0.00832521	0.419008	0.17159	0.198902	0.726461	0.296702	0.0343229	-0.140515	0.754732	0.220439	0.697726	-0.108837	0.918308	-0.322418	0.498534	0.0826972	0.770654	0.62682	0.00744493	-0.0264232	0.9553
FBgn0000477	CG7780	3R	1228	586	572	351	353	480	38	503	493	350	335	398	138	-0.817804	3.34285e-06	-0.353724	0.578998	-0.104848	0.874015	-0.268569	0.460315	0.465486	0.0242668	-0.857778	0.00140282	0.0467757	0.959662	-0.0876644	0.921027	0.00575209	0.995323	-0.544191	0.118922	-0.486123	0.319726	-0.141198	0.917	-0.65019	0.28778	-0.0764379	0.871787	0.201383	0.783668
FBgn0000479	CG32498	X	11128	9310	6808	9763	10829	9251	9088	9038	7997	9515	8618	10172	12036	0.212449	0.389196	0.0798096	0.803498	-0.135079	0.402089	-0.00143612	0.998191	-0.20002	0.633435	-0.00804279	0.98952	-0.0813756	0.89171	0.119826	0.739815	0.23499	0.400058	-0.00531318	0.997471	0.313107	0.288609	0.310758	0.355654	0.329904	0.239514	-0.218451	0.309008	-0.0828885	0.816748
FBgn0000482	CG3093	X	3161	626	642	699	695	824	703	689	703	799	769	668	666	0.00225765	0.993127	0.153721	0.561891	0.153089	0.463009	0.0461804	0.96065	0.0438449	0.998294	0.114295	0.76511	-0.0284618	0.974216	-0.0365354	0.954503	-0.187048	0.674741	0.0647257	0.937652	-0.0824584	0.980696	-0.15493	0.821006	-0.0392347	0.922757	0.114267	0.736192	-0.103541	0.80077
FBgn0000489	CG6117	3L	2881	4190	4639	4902	6171	824	715	4451	2997	1749	1825	1605	2457	0.184876	0.440641	-2.54776	2.71312e-61	-2.72109	7.74415e-79	-0.28159	0.546537	-0.398294	0.211766	-1.42879	1.16407e-18	1.04821	4.63974e-10	-1.12785	6.99563e-10	1.10653	5.30664e-08	-1.00443	1.51163e-05	-0.669698	0.0199031	0.194795	0.79798	-1.13921	1.12929e-06	-1.59248	4.92984e-25	2.10381	2.86216e-24
FBgn0000490	CG9885	2L	4230	164	118	179	174	203	210	203	195	217	173	161	188	0.172584	0.684324	0.408275	0.25685	0.238215	0.447336	0.324996	0.546133	0.168249	0.978841	0.230638	0.690795	-0.108506	0.925967	0.00459725	0.996789	-0.204257	0.783557	-0.0897217	0.938979	-0.172722	0.922167	-0.0729476	0.955948	0.172137	0.74139	0.0810006	0.893307	-0.030243	0.966864
FBgn0000499	CG18361	X	2844	492	564	504	489	516	535	512	560	557	735	484	528	-0.21397	0.398395	-0.106554	0.742201	0.108233	0.675901	-0.0539983	0.957938	0.137868	0.979262	0.0880035	0.850605	0.183266	0.771398	0.0438647	0.951126	-0.0641673	0.95925	0.137863	0.858262	-0.0993503	0.978322	-0.239642	0.698195	-0.166458	0.633964	0.293887	0.34322	0.0460573	0.932898
FBgn0000504	CG11094	3R	6941	971	716	653	699	1954	1492	776	1205	1624	1087	1435	1046	-0.427728	0.0639549	0.871891	0.000113704	1.32384	1.67952e-18	0.121538	0.902801	0.439355	0.163619	0.448736	0.264917	-0.323988	0.548275	0.741761	5.76844e-05	-0.397212	0.201299	0.273864	0.711996	0.213278	0.885861	-0.0602164	0.961648	0.408537	0.202672	0.832385	0.00364567	-0.68661	0.0175481
FBgn0000520	CG2711	X	2002	411	321	470	509	370	328	471	387	397	510	377	422	0.271155	0.31918	-0.164647	0.623927	-0.441178	0.0225687	0.123111	0.887917	-0.113183	0.998294	0.105307	0.835235	0.248108	0.663172	-0.232159	0.460372	0.152385	0.839759	-0.0219089	0.985901	-0.111009	0.977793	-0.0972825	0.92945	0.0129837	0.984582	-0.149942	0.700552	0.296436	0.371338
FBgn0000524	CG3929	X	3828	710	660	798	838	704	670	805	797	803	1118	743	748	0.118434	0.627061	-0.0977391	0.728286	-0.216618	0.239857	0.129138	0.83455	0.0190754	0.998294	0.270147	0.427432	0.347025	0.391787	-0.100575	0.825808	0.0906048	0.913364	0.132896	0.857942	-0.120665	0.933827	-0.252994	0.654259	0.00820418	0.987429	0.158802	0.642437	0.231745	0.401379
FBgn0000536	CG3525	X	4627	1845	1732	2178	2388	1662	1791	2020	2237	1850	1961	1969	2251	0.213119	0.234504	-0.148425	0.550174	-0.36121	0.0209838	0.154164	0.770868	-0.0432061	0.998294	-0.0904884	0.762586	0.0594042	0.932969	-0.0833898	0.86153	0.240563	0.454536	-0.242751	0.512727	-0.0399659	0.994746	0.186396	0.67636	0.119814	0.688734	-0.299427	0.0946683	0.305318	0.219615
FBgn0000541	CG32346	3L	9296	2085	1697	2633	2327	2703	2372	2530	1818	2482	4475	2408	2470	0.24934	0.234929	0.306724	0.164307	0.0587851	0.785751	0.100229	0.908848	-0.112714	0.998294	0.60539	0.0662775	0.302571	0.557979	-0.000935713	0.999665	-0.0672524	0.938903	0.451501	0.364944	0.114389	0.974662	-0.346237	0.529728	0.243798	0.340243	0.372193	0.263964	-0.187336	0.641058
FBgn0000543	CG5714	3L	2204	522	582	525	528	580	490	509	591	616	697	641	480	-0.194777	0.434092	-0.147766	0.615755	0.0475824	0.871973	-0.0766871	0.928661	0.0965051	0.998294	0.0563272	0.90283	0.192798	0.726461	0.0932632	0.898002	0.0437127	0.977263	0.131242	0.860789	-0.00314951	0.996705	-0.134105	0.888513	-0.0854995	0.850189	0.247469	0.382685	0.0609089	0.91205
FBgn0000546	CG1765	2R	8415	832	726	929	928	929	1014	947	907	834	1093	901	925	0.11612	0.636948	0.208051	0.435044	0.0941187	0.694975	0.151658	0.798616	0.0440873	0.998294	0.106242	0.784676	-0.084928	0.917504	-0.00131489	0.999467	-0.0975503	0.905724	-0.0466751	0.958292	-0.0478144	0.994746	-0.0125892	0.992539	0.110797	0.737272	-0.00320289	0.992787	-0.0465405	0.924725
FBgn0000547	CG12676	2L	6378	1150	969	1563	1333	3087	3044	1419	1174	1954	2488	2190	2154	0.305465	0.14145	1.38264	2.59205e-17	1.08304	5.36923e-17	0.184081	0.738693	-0.0914529	0.998294	0.825388	0.000108386	-0.506662	0.0118248	0.553512	6.8591e-05	-0.478062	0.00107604	0.603752	0.0130055	0.631935	0.000621186	0.0276313	0.974736	0.884878	2.6496e-07	0.529641	0.00585225	-1.16184	2.82051e-12
FBgn0000556	CG8280	2R	2278	204638	206710	293877	285778	299821	298444	253594	257954	265005	269900	283691	289183	0.354583	0.00375376	0.425888	0.00671254	0.0745669	0.631131	0.21596	0.466357	-0.119951	0.888808	0.188333	0.36425	-0.226492	0.320114	0.00569665	0.987057	-0.0760449	0.897387	-0.0345111	0.953901	0.1228	0.884816	0.14798	0.635606	0.353845	0.0308957	-0.161367	0.246283	-0.198366	0.382707
FBgn0000559	CG2238	2L	3008	138118	144954	135411	141788	149731	139270	132107	141399	149141	149491	150642	145717	-0.161632	0.316278	-0.0752244	0.740811	0.087204	0.545144	-0.122699	0.817163	0.0304162	0.998294	-0.10412	0.67259	-0.0247234	0.963424	0.113836	0.611553	0.0185871	0.986263	0.0249846	0.97174	0.077519	0.978322	0.0425221	0.945222	-0.0469042	0.873595	0.0581299	0.768275	-0.0547462	0.881243
FBgn0000562	CG4051	2R	4428	5347	4764	5751	6041	5626	5603	6000	5518	5529	5861	5285	5728	0.0867247	0.673181	0.0461043	0.863518	-0.0399867	0.837125	0.0968656	0.879051	0.0161823	0.998294	-0.0130977	0.971447	-0.0531641	0.921216	-0.0716135	0.854496	-0.0432116	0.966761	-0.111196	0.796506	-0.0877848	0.974662	0.00788889	0.992539	0.00967918	0.983299	-0.0978061	0.584977	0.0548074	0.886473
FBgn0000565	CG7266	3L	1090	970	576	877	916	1225	656	747	1058	925	572	1654	547	0.0768732	0.862632	0.147545	0.768245	0.0770534	0.858814	0.111907	0.91956	0.049035	0.998294	-0.173286	0.763358	-0.260616	0.74262	0.0722831	0.929541	0.0496516	0.976538	-0.264663	0.738767	0.0623679	0.994746	0.152858	0.880648	0.188915	0.823015	-0.243596	0.589026	-0.0189091	0.98243
FBgn0000566	CG5345	2R	1478	2797	3476	3585	3874	3440	3188	2967	3579	3286	3072	4422	3779	0.109864	0.680601	-0.0275935	0.934946	-0.139719	0.369918	-0.0192591	0.988267	-0.117455	0.992292	-0.154154	0.647752	-0.12178	0.803417	0.145754	0.649261	0.263929	0.319131	-0.12749	0.836002	0.252707	0.646861	0.377868	0.190661	0.255932	0.386227	-0.26463	0.18976	0.00542739	0.990994
FBgn0000567	CG32180	3L	6239	497	484	677	658	834	1021	702	757	763	730	787	937	0.299442	0.136464	0.777683	0.000526627	0.4855	0.0150577	0.437183	0.0906519	0.156654	0.922189	0.390911	0.205616	-0.33429	0.444857	0.34434	0.0914184	-0.107723	0.919919	-0.0583367	0.947702	0.180081	0.856721	0.222901	0.702549	0.661962	0.00170715	0.106365	0.761684	-0.305918	0.344045
FBgn0000568	CG8127	3L	8236	4970	6524	4473	4330	4889	6623	4836	6964	3769	4410	3443	5242	-0.499566	0.0107746	-0.0903213	0.819518	0.404025	0.0587932	-0.0368491	0.976339	0.378774	0.209961	-0.641281	0.00625661	-0.508954	0.0776871	0.00168414	0.999467	-0.331176	0.457703	-0.554817	0.0759723	-0.355135	0.527555	0.120202	0.897015	-0.474834	0.134744	-0.155291	0.365509	0.0457728	0.951078
FBgn0000575	CG1007	3L	2049	1531	1456	2271	2237	1668	1249	1970	1602	2056	1791	2017	1972	0.449673	0.00128344	-0.139976	0.615755	-0.585116	0.000173224	0.155997	0.793528	-0.247923	0.492356	0.174311	0.592041	0.292445	0.503616	-0.144116	0.536946	0.386777	0.0986217	0.0113249	0.994576	0.113703	0.95933	0.092088	0.914835	0.293448	0.145825	-0.256416	0.300504	0.29701	0.338963
FBgn0000578	CG15112	2R	4417	1758	2547	1398	1272	2657	2800	1607	1996	1934	2106	2000	1858	-0.77685	0.000450296	0.222418	0.492058	1.03529	1.01485e-15	-0.281084	0.592221	0.408515	0.0718428	-0.258209	0.467722	-0.478011	0.01364	0.50839	0.000182091	-0.47207	0.00579972	0.0550355	0.947702	0.0571514	0.994746	-0.00740222	0.993618	-0.254827	0.478352	0.525195	0.000694726	-0.542921	0.0144205
FBgn0000579	CG17654	2L	2664	28070	31123	27299	27254	31008	35054	26215	28898	28899	30398	28402	32280	-0.247237	0.115776	0.0542153	0.858128	0.3017	0.0486114	-0.170021	0.722284	0.0616265	0.998294	-0.178005	0.442454	-0.219888	0.484895	0.165435	0.426413	-0.129157	0.844994	0.00319653	0.997908	0.0960095	0.973095	0.0845332	0.875521	-0.0764479	0.812313	0.0694812	0.666136	-0.230882	0.427047
FBgn0000581	CG7776	2R	10794	2502	2024	2385	2186	2440	2386	2367	2228	2263	3103	2324	2423	-0.114474	0.645161	-0.0107928	0.975403	0.105712	0.55486	-0.0540411	0.947504	0.0537409	0.998294	0.0489545	0.91096	0.0627083	0.93611	0.0722004	0.865125	-0.0387216	0.973373	0.103703	0.878014	0.0144649	0.996169	-0.0995967	0.901255	-0.041673	0.913286	0.163276	0.548497	-0.048065	0.906369
FBgn0000592	CG6917	3L	1837	169	168	65	21	626	273	125	220	79	622	830	35	-1.58921	4.84059e-05	1.11471	0.00178651	1.3513	0.00281077	-0.0324033	0.983725	0.695021	0.00555519	0.231154	0.726119	-0.0705472	0.940815	0.121387	0.58682	-0.00306303	0.995473	0.146431	0.861819	0.0799376	0.971685	0.0243396	0.973228	0.211946	0.724993	1.00596	0.0161619	-1.0244	0.00777405
FBgn0000611	CG8933	X	2930	3927	3974	4221	4119	4297	4082	4228	3786	4062	4423	4179	4155	-0.0552162	0.792707	-0.0207978	0.939125	0.03503	0.852536	-0.0586183	0.929811	-0.00551886	0.998294	-0.081619	0.758909	-0.0553556	0.917504	0.0208462	0.96413	-0.023318	0.982279	-0.0183794	0.98067	0.0235688	0.996169	0.030482	0.961648	-0.0361281	0.908486	-0.025385	0.90757	-0.0414703	0.920904
FBgn0000615	CG8994	2R	2631	212	178	323	239	320	289	236	296	312	1187	301	334	0.359827	0.268396	0.503747	0.0660184	0.133722	0.704054	0.296685	0.577726	-0.0180938	0.998294	1.18584	0.00988609	0.638033	0.212243	0.153808	0.800634	0.0368461	0.981149	0.734161	0.146336	0.176893	0.911391	-0.531644	0.343872	0.543454	0.053351	0.817944	0.0710649	-0.155295	0.759828
FBgn0000617	CG6474	X	1124	235	214	205	215	294	275	255	238	279	306	260	256	-0.214408	0.509053	0.222451	0.486078	0.439024	0.0602886	0.0437483	0.96999	0.218422	0.85428	0.170763	0.721791	-0.0293963	0.979112	0.257608	0.477231	-0.131745	0.883627	0.117538	0.899663	0.0286339	0.996169	-0.0954339	0.934327	0.0807758	0.859539	0.367861	0.319767	-0.170667	0.702837
FBgn0000618	CG15191	X	503	130	104	124	122	121	111	132	100	138	119	109	149	-0.054024	0.919321	-0.106015	0.828096	-0.0507014	0.917768	-0.0705364	0.957938	-0.0214736	0.998294	-0.0332885	0.967091	0.0513461	0.9692	0.0606135	0.95176	0.09409	0.956629	0.0349119	0.982636	0.0817822	0.994746	0.0327459	0.983237	0.0239732	0.977282	0.0145432	0.980328	0.0181169	0.982817
FBgn0000629	CG6502	3L	2650	528	493	637	615	572	503	604	546	560	855	553	510	0.15464	0.528119	-0.0316434	0.92685	-0.186227	0.378071	0.078509	0.921791	-0.0610466	0.998294	0.245144	0.543714	0.256654	0.65535	-0.188032	0.55831	-0.0275893	0.984855	0.155369	0.848966	-0.124887	0.955266	-0.269799	0.685319	-0.0523993	0.895487	0.101919	0.819215	0.113452	0.789653
FBgn0000635	CG3665	X	4893	22390	33958	23839	23006	33096	44468	22858	22588	25867	27898	36723	33543	-0.379984	0.138965	0.332986	0.341046	0.730017	6.29736e-05	-0.332338	0.429551	0.00770825	0.998294	-0.237425	0.499938	-0.546055	0.0307163	0.573615	6.97791e-08	-0.140429	0.866093	0.134369	0.690093	0.549409	0.000446854	0.420078	0.0074619	0.185152	0.646684	0.145916	0.266386	-0.701906	0.00229059
FBgn0000636	CG5803	2L	4084	1147	1316	1273	1205	987	1251	1084	1142	983	859	1347	1192	-0.122307	0.617416	-0.22525	0.465168	-0.106086	0.715295	-0.205836	0.655786	-0.0913591	0.998294	-0.55481	0.0462822	-0.299871	0.546006	0.0529685	0.928672	0.133076	0.879404	-0.326216	0.445899	0.140427	0.90911	0.439543	0.189325	-0.0676841	0.856552	-0.43717	0.0716214	0.00719392	0.990671
FBgn0000659	CG10002	3R	4289	12819	12855	8992	9515	11968	10536	10986	11058	11371	10730	9662	9085	-0.595087	7.09025e-07	-0.291318	0.0899853	0.303976	0.0101244	-0.282591	0.25024	0.282186	0.0879185	-0.383548	0.0579374	-0.0903038	0.869325	0.0392832	0.932508	-0.259343	0.211615	-0.0885355	0.874091	-0.24448	0.390473	-0.169898	0.686039	-0.55092	0.000389244	0.203115	0.277468	-0.00582993	0.989649
FBgn0000662	CG6315	2R	2567	1241	1122	1407	1376	1507	1367	1353	1286	1426	1583	1394	1443	0.0997955	0.656242	0.170798	0.460864	0.0726403	0.712169	0.0698984	0.921791	-0.0224727	0.998294	0.153729	0.600968	-0.00899864	0.988682	0.0470331	0.928203	-0.03217	0.976538	0.080118	0.89804	0.0664986	0.990325	-0.0243041	0.975894	0.144729	0.606322	0.0588721	0.828034	-0.0963776	0.789653
FBgn0000667	CG4376	X	4868	737	750	902	807	944	808	826	824	907	1354	777	884	0.0640459	0.821728	0.123683	0.640964	0.0605147	0.810527	0.060405	0.936049	0.00122802	0.999425	0.372409	0.264917	0.242729	0.645871	-0.0163279	0.979095	-0.0818571	0.938445	0.294371	0.563406	-0.0195824	0.996169	-0.309049	0.565866	0.0430407	0.913286	0.309976	0.326124	-0.0593203	0.895466
FBgn0000709	CG1484	X	4827	1078	1045	959	1018	863	805	877	992	840	1097	910	882	-0.229966	0.221951	-0.440351	0.0188934	-0.21115	0.230511	-0.239058	0.538946	-0.0247107	0.998294	-0.304695	0.300671	0.119377	0.869233	-0.108192	0.789486	0.0785955	0.932281	-0.0507104	0.956426	-0.0815107	0.982745	-0.0423626	0.967033	-0.344394	0.100786	-0.0805605	0.818686	0.177412	0.602339
FBgn0000711	CG2096	X	3883	1037	1070	1110	1102	1196	1176	972	1087	1028	1313	1165	1148	-0.0624885	0.803721	0.0635626	0.817383	0.127244	0.495077	-0.104291	0.884852	-0.0446686	0.998294	-0.0382435	0.932573	-0.0911056	0.898256	0.0807068	0.856106	-0.0494798	0.964094	0.068688	0.9309	0.120759	0.941254	0.0400482	0.966609	0.0194621	0.963555	0.0243328	0.944351	-0.173367	0.599916
FBgn0000719	CG9559	X	5256	467	702	786	795	981	921	652	708	760	820	910	734	0.277023	0.378014	0.553533	0.0491327	0.287538	0.0706587	0.107643	0.91355	-0.143388	0.963419	0.216778	0.623809	-0.311926	0.349815	0.0690665	0.923154	-0.196208	0.699235	0.101429	0.891757	0.204643	0.820964	0.098233	0.923946	0.338364	0.37302	-0.0486016	0.886073	-0.438292	0.0378241
FBgn0000721	CG10033	2L	4595	2082	1748	1556	1623	2037	2238	1719	1934	1716	3235	1601	2143	-0.389408	0.0234832	0.0552328	0.86376	0.446772	0.00291627	-0.133567	0.83455	0.224316	0.553726	0.147482	0.754589	0.0929748	0.92819	0.222162	0.482474	-0.180287	0.776833	0.256877	0.702069	0.00206709	0.997419	-0.243736	0.757116	-0.136855	0.721164	0.495614	0.129879	-0.196468	0.555618
FBgn0000723	CG8874	3R	4958	5157	6463	5245	5803	5029	5634	4608	3951	3930	4307	4284	5342	-0.200654	0.392297	-0.217309	0.433956	-0.0179091	0.950055	-0.464652	0.0789546	-0.281547	0.269367	-0.649516	0.00240383	-0.421228	0.048592	-0.158053	0.643041	-0.147674	0.830098	-0.146953	0.74432	0.119858	0.958442	0.255432	0.505662	-0.36484	0.179532	-0.461475	0.000407298	-0.284318	0.28762
FBgn0000810	CG3218	X	3052	339	262	411	390	537	382	384	338	510	545	408	360	0.26485	0.358287	0.466635	0.119967	0.208062	0.460608	0.152968	0.847407	-0.0805758	0.998294	0.560362	0.0972266	0.106561	0.914264	-0.031582	0.968036	-0.217829	0.727522	0.382839	0.396273	0.0490222	0.994746	-0.330037	0.511542	0.22302	0.565568	0.317195	0.283057	-0.29265	0.43753
FBgn0000927	CG2707	X	2235	133	92	36	30	71	68	58	50	88	1056	46	94	-1.54542	1.01698e-05	-0.69269	0.0743548	0.874122	0.0244047	-0.771062	0.0288926	0.332824	0.625511	0.441405	0.40108	0.316629	0.461757	0.441904	NA	-0.00460503	0.996539	0.368774	0.423226	0.167034	0.970023	-0.239051	0.572037	-0.612636	0.21363	0.538067	0.15816	-0.273014	0.678387
FBgn0000996	CG8171	2R	3138	247	225	322	304	219	203	240	289	258	1517	246	308	0.25793	0.359666	-0.251074	0.440099	-0.509914	0.0211121	0.0689112	0.946245	-0.146657	0.992292	0.54834	0.345627	0.374879	0.469682	-0.12321	0.85287	0.298287	0.505247	0.336475	0.590349	0.0261754	0.996169	-0.254732	0.667844	0.107485	0.819418	0.38001	0.460752	0.316731	0.402447
FBgn0001075	CG3352	2L	16852	348	237	194	138	98	79	269	241	197	165	121	105	-0.844745	0.00522714	-1.64938	6.69901e-09	-0.769955	0.0141283	-0.222855	0.759128	0.463751	0.146825	-0.712703	0.0877379	0.629145	0.189049	-0.350471	0.37329	0.230385	0.781975	-0.444104	0.434513	-0.925768	7.64538e-05	-0.392059	0.558256	-1.30646	4.20715e-06	0.0624242	0.923121	1.37561	4.03504e-08
FBgn0001078	CG4059	3L	6060	1202	1081	1772	1625	1651	1415	1743	1626	1563	2247	1345	1418	0.427332	0.0082998	0.307672	0.13948	-0.118419	0.537313	0.436514	0.0495956	0.0357645	0.998294	0.505229	0.0641444	0.203785	0.685614	-0.253943	0.160609	-0.150652	0.749695	0.0591752	0.946155	-0.287982	0.295903	-0.341294	0.41226	0.155691	0.580898	0.0981696	0.77981	0.153007	0.625978
FBgn0001079	CG6551	X	3251	290	279	350	403	432	348	363	321	443	512	343	355	0.25571	0.350696	0.327495	0.24079	0.0719244	0.827981	0.156497	0.827819	-0.0698082	0.998294	0.504886	0.125141	0.182734	0.787003	-0.0727413	0.92364	-0.147071	0.848465	0.3215	0.529011	-0.00136798	0.998781	-0.324624	0.51834	0.169545	0.64176	0.260442	0.45228	-0.152444	0.739037
FBgn0001084	CG13396	2L	1688	49	24	68	45	69	43	58	33	70	120	74	56	0.35703	0.549824	0.378454	0.5342	0.00623581	0.993175	0.11315	NA	-0.102884	0.998294	0.69404	0.232467	0.33058	0.664423	0.111522	NA	0.110067	0.953405	0.4527	NA	0.243723	0.884331	-0.217612	0.83359	0.518744	0.367629	0.404291	0.475316	-0.191389	0.82441
FBgn0001085	CG17697	3L	3817	49	36	129	102	155	101	91	78	99	575	94	139	1.08652	0.0023593	1.24598	0.000817667	0.146823	0.762365	0.586873	0.175172	-0.240454	0.887855	1.4579	0.00224792	0.494537	0.401449	0.0211786	0.981913	-0.0921914	0.959567	0.729734	0.140113	0.275455	0.816923	-0.450622	0.421359	1.06911	0.00561884	0.685834	0.165956	-0.47254	0.297534
FBgn0001087	CG10986	X	4147	1041	918	953	908	1149	1044	1057	891	1164	1407	978	976	-0.200861	0.336202	0.0547378	0.852916	0.258139	0.104994	-0.0814946	0.920243	0.101009	0.998294	0.190959	0.533587	0.137972	0.791752	0.0854579	0.853579	-0.166609	0.69135	0.265738	0.540564	-0.0228591	0.996169	-0.300191	0.406071	-0.111862	0.724955	0.391008	0.0533454	-0.141327	0.703735
FBgn0001089	CG9092	2L	2345	42	42	47	50	25	30	55	45	31	36	46	21	0.05776	0.935156	-0.545473	0.320571	-0.582754	0.221905	0.100797	0.936049	0.0447577	0.998294	-0.290363	0.678201	0.0708896	0.956482	-0.188568	NA	0.0947767	0.958056	-0.304255	NA	-0.255327	0.862266	0.0175693	0.992539	-0.295411	0.683129	-0.311413	0.608795	0.622478	0.232048
FBgn0001091	CG12055	2R	1480	30246	30569	21674	22369	23734	25585	23513	24525	25928	26222	22668	25247	-0.589409	3.12643e-07	-0.393947	0.0288546	0.191146	0.217934	-0.393754	0.0483366	0.164848	0.671678	-0.394218	0.0244807	0.00377387	0.993666	0.135852	0.558263	-0.0566667	0.956629	0.0170511	0.980694	-0.032682	0.994746	-0.0629399	0.926045	-0.444014	0.00894793	0.191316	0.181266	-0.0181101	0.970924
FBgn0001092	CG8893	X	1443	29137	28600	25248	25189	33129	34381	27160	29878	33658	34198	28017	30623	-0.323721	0.0086734	0.119065	0.589813	0.443952	9.16838e-05	-0.0922866	0.884788	0.21085	0.447781	0.0468744	0.86775	-0.0651265	0.902223	0.227908	0.100051	-0.205915	0.459184	0.141078	0.733196	0.00703029	0.996482	-0.146686	0.687853	-0.0890452	0.743735	0.372177	0.000688956	-0.21366	0.411249
FBgn0001098	CG5320	3R	2195	22404	30505	37478	39781	42865	38486	33863	39067	36417	32372	37356	40730	0.391206	0.0712853	0.487714	0.0356439	0.100278	0.500426	0.324908	0.39663	-0.0273091	0.998294	0.182157	0.604978	-0.289008	0.307233	0.0357976	0.938934	-0.0703389	0.924501	-0.165898	0.745478	0.0592926	0.994439	0.21463	0.588349	0.417562	0.108741	-0.203055	0.336259	-0.127783	0.704577
FBgn0001099	CG33756	3L	1175	141	140	214	188	178	153	211	137	198	245	147	199	0.350893	0.271885	0.118103	0.782056	-0.233684	0.47271	0.16647	0.865381	-0.101724	0.998294	0.389524	0.400889	0.254403	0.727676	-0.139785	0.851388	0.0350878	0.986464	0.172037	0.868975	-0.0257229	0.996169	-0.199104	0.839622	0.164083	0.751912	0.0710194	0.896579	0.0805003	0.918474
FBgn0001104	CG10060	3L	2067	580	643	511	609	736	568	480	519	578	1268	501	591	-0.249197	0.323556	-0.0180973	0.963316	0.231449	0.354329	-0.330263	0.32841	-0.0925281	0.998294	0.319385	0.5164	0.291343	0.679542	-0.0120891	0.984186	-0.227388	0.641952	0.55109	0.298019	0.0817479	0.991448	-0.443576	0.453805	-0.262386	0.387029	0.50998	0.223055	-0.333151	0.256374
FBgn0001105	CG10545	X	5321	7338	6573	8721	8430	9780	9286	7843	7814	8486	8680	8899	8564	0.165229	0.327453	0.341079	0.0491604	0.179024	0.147551	0.0817575	0.896301	-0.0740066	0.998294	0.114941	0.65493	-0.215558	0.378498	0.0467185	0.914525	-0.134825	0.717303	0.0305379	0.961555	0.116966	0.90911	0.0768038	0.887936	0.208251	0.344996	-0.0463853	0.823486	-0.253997	0.193826
FBgn0001108	CG9206	3L	4550	2725	2839	2754	2749	3027	2854	2597	2826	2848	3341	2856	2791	-0.147174	0.411804	-0.0258242	0.92526	0.122422	0.420209	-0.109816	0.858567	0.0284067	0.998294	-0.0349829	0.91937	-0.00448383	0.992535	0.0569014	0.894069	-0.0703489	0.925978	0.0793161	0.89542	0.0242104	0.996169	-0.0669512	0.92728	-0.0900359	0.753551	0.112893	0.56844	-0.0906481	0.802964
FBgn0001114	CG9280	2L	3373	106	52	149	82	98	186	116	53	44	51	85	117	0.319967	0.568774	0.597493	0.245766	0.26686	0.62317	0.00746959	0.996097	-0.160433	0.998294	-0.558126	0.353063	-0.82847	0.0501742	-0.0905865	0.928387	-0.286912	0.69929	-0.425308	NA	0.116823	0.990049	0.553275	0.309834	0.189179	0.785369	-0.797686	0.083997	-0.524717	0.362081
FBgn0001122	CG2204	2R	5457	390	417	393	423	432	445	424	441	391	581	399	458	-0.112962	0.709329	0.0147042	0.969232	0.128496	0.63078	0.0146597	0.989825	0.113628	0.998294	0.0627716	0.912049	0.0495827	0.962571	0.0791207	0.913946	-0.0447895	0.976538	0.0458557	0.966749	-0.0386107	0.994746	-0.0884969	0.941039	-0.0264185	0.960313	0.166624	0.706355	0.00051939	0.999856
FBgn0001123	CG2835	2R	1859	2345	2351	2320	2410	2613	2529	2541	2384	2599	2399	2543	2541	-0.121054	0.522868	0.0247458	0.929029	0.146945	0.342299	-0.0138038	0.989825	0.100466	0.991776	-0.0873333	0.788437	-0.103775	0.862398	0.119486	0.652341	-0.0315617	0.976538	-0.0697081	0.920283	0.0136193	0.996169	0.0709149	0.92945	0.000383972	0.998943	0.0325232	0.917825	-0.0396419	0.923593
FBgn0001124	CG8430	2R	1683	19530	17508	14142	14325	15179	15728	16557	17591	18096	17670	15839	16142	-0.50299	7.44117e-05	-0.354242	0.0522738	0.147012	0.327688	-0.183695	0.636713	0.291373	0.0766142	-0.224638	0.323951	0.128478	0.744589	0.182659	0.204297	0.027981	0.978764	-0.0308459	0.964483	-0.116702	0.910624	-0.100539	0.834127	-0.315252	0.0846477	0.275061	0.056938	0.157697	0.589461
FBgn0001125	CG4233	2L	1575	13198	14039	13927	14738	14675	14365	12962	15643	13465	12880	13575	15535	-0.0595889	0.781229	-0.0128309	0.963577	0.0474933	0.791053	-0.0104509	0.991676	0.0437641	0.998294	-0.222451	0.34551	-0.201544	0.499476	0.0415553	0.932848	-0.0137116	0.993536	-0.200335	0.64883	-0.0067231	0.996482	0.182591	0.655874	-0.0183236	0.964805	-0.163204	0.388803	0.000573269	0.999856
FBgn0001128	CG9042	2L	2503	46132	50627	69564	67857	40257	43673	64252	65209	44212	43309	56302	57678	0.363362	0.00976008	-0.298923	0.1479	-0.665045	2.68444e-08	0.310391	0.219363	-0.0317865	0.998294	-0.31691	0.135179	-0.0142632	0.982682	-0.236878	0.0409108	0.387445	0.0252354	-0.629596	4.55944e-05	-0.200468	0.560797	0.412477	0.00826748	0.1174	0.663695	-0.681785	3.65768e-10	0.617735	0.000224803
FBgn0001133	CG33133	2R	1894	671	612	872	959	1078	968	907	810	1134	1090	1048	1043	0.366502	0.0527024	0.5475	0.00388368	0.18236	0.336136	0.302129	0.347438	-0.0358656	0.998294	0.571217	0.0236538	0.0443462	0.955367	0.194617	0.452414	0.0140611	0.993536	0.247173	0.585889	0.226123	0.649794	-0.0305849	0.973934	0.56639	0.00296474	0.218915	0.42638	-0.219371	0.44684
FBgn0001134	CG7446	3L	4071	54	43	221	200	211	172	176	68	197	183	253	226	1.74955	3.10484e-10	1.66305	3.24942e-08	-0.102457	0.785751	0.665394	0.121329	-0.337507	0.613823	1.35378	0.000704952	-0.0586129	0.960452	0.164833	0.765662	0.243947	0.677561	0.295072	0.746144	0.505199	0.280666	0.277936	0.713988	1.90958	5.76519e-12	-0.159235	0.757458	-0.472564	0.40015
FBgn0001139	CG8384	3R	3975	2467	2229	2837	2744	3110	3031	2758	2615	2846	3827	2891	2927	0.112988	0.568196	0.2749	0.154641	0.164501	0.256422	0.102713	0.867118	-0.0027719	0.998294	0.297004	0.267435	0.0334824	0.963424	0.0783548	0.826351	-0.0892016	0.883627	0.186392	0.690093	0.0770273	0.978322	-0.120037	0.853968	0.189348	0.423034	0.190554	0.426891	-0.165615	0.541805
FBgn0001142	CG2718	2L	2396	22199	18293	17352	16604	19887	20084	19548	17335	21252	24562	17052	18526	-0.376413	0.019086	-0.117895	0.641663	0.261448	0.0314707	-0.196756	0.653597	0.156223	0.805392	-0.00920589	0.983906	0.112175	0.75322	0.0853343	0.785891	-0.173759	0.568456	0.197981	0.540354	-0.0756225	0.979419	-0.289179	0.154975	-0.287464	0.202587	0.372357	0.000440152	-0.0926989	0.792762
FBgn0001145	CG1743	X	1990	7815	11579	13171	14399	15163	16178	12092	15915	14789	12519	15778	16229	0.348963	0.179362	0.552028	0.0350043	0.211725	0.180042	0.362903	0.39663	0.0635019	0.998294	0.284141	0.434756	-0.245132	0.520822	0.224754	0.138154	0.00961642	0.993685	-0.116584	0.87944	0.136508	0.937522	0.251815	0.532853	0.560976	0.0340418	-0.0531974	0.871625	-0.131985	0.765928
FBgn0001149	CG10045	3R	843	39109	32504	40520	39528	20851	20744	33861	38930	28972	26290	28635	33413	0.0271785	0.919274	-0.86078	1.54331e-07	-0.901135	1.03156e-20	-0.0513226	0.95371	-0.075995	0.998294	-0.52651	0.0155656	0.316371	0.212243	-0.321365	0.0250947	0.511568	0.00110392	-0.455134	0.0731188	-0.232977	0.646861	0.199256	0.652483	-0.305871	0.19038	-0.558873	8.183e-05	0.793289	1.35801e-06
FBgn0001168	CG6494	3L	2335	7900	10343	2376	2574	3274	8795	2695	12394	2288	2518	2718	6186	-1.93199	1.06083e-30	-0.39305	0.576391	0.729115	0.168962	-0.072578	0.94811	0.217194	0.693906	-1.99007	2.61143e-26	-0.53267	0.340914	0.296919	0.506587	-0.0960798	0.944592	-0.455171	0.439145	-0.114919	0.970772	0.637932	0.11687	-0.719092	0.199973	-0.0908678	0.692835	0.0882935	0.928954
FBgn0001169	CG5460	3R	6004	666	712	817	696	830	819	808	744	736	1271	783	720	-5.83633e-05	0.999841	0.148039	0.57513	0.148658	0.511874	0.0783093	0.921089	0.0752611	0.998294	0.30077	0.462959	0.155465	0.858095	0.0121374	0.982791	-0.135231	0.83454	0.206751	0.777596	-0.0678293	0.994439	-0.26185	0.719054	0.010267	0.984924	0.294414	0.458702	-0.0636149	0.885152
FBgn0001179	CG8019	3L	2604	320	248	209	227	283	174	255	241	300	437	248	187	-0.476357	0.0817702	-0.38767	0.300341	0.0785544	0.866274	-0.230019	0.716278	0.183601	0.953566	0.155615	0.765079	0.43508	0.439233	0.0150844	0.983736	-0.0542994	0.976538	0.363077	0.535723	-0.168487	0.932031	-0.478152	0.36852	-0.445749	0.20528	0.585658	0.0920166	0.130245	0.837647
FBgn0001185	CG4694	2L	2378	655	554	974	886	914	802	813	687	858	809	863	879	0.46944	0.0138406	0.382774	0.088936	-0.0865029	0.707085	0.200046	0.717858	-0.220673	0.703121	0.260079	0.449043	-0.0996448	0.895351	-0.0648478	0.913946	0.00553312	0.995323	0.0484261	0.958292	0.162091	0.883672	0.102769	0.902436	0.39397	0.0895524	-0.19007	0.522458	-0.161851	0.660088
FBgn0001186	CG3001	X	4139	13651	14762	7765	8383	14411	16802	9594	9955	9752	12041	9749	12384	-0.928213	3.65925e-13	0.0330633	0.920441	0.954861	1.32232e-11	-0.574811	0.00118795	0.301213	0.0794885	-0.553257	0.00235753	-0.554858	0.00634232	0.426274	0.0110587	-0.446136	0.0588288	0.0469235	0.94024	0.128477	0.936656	0.074314	0.930189	-0.452704	0.0392823	0.366218	0.0105379	-0.623855	0.00119629
FBgn0001187	CG8094	2R	1493	31638	29661	38653	38602	27692	27779	40053	37123	31147	30245	35138	37993	0.196717	0.1659	-0.242446	0.186776	-0.441074	2.45725e-05	0.231863	0.417631	0.0466693	0.998294	-0.174483	0.451929	0.0688423	0.89818	-0.0537911	0.889896	0.354421	0.0271879	-0.404749	0.0466939	-0.100345	0.950218	0.288191	0.215752	0.136771	0.578718	-0.369165	0.00383962	0.479341	0.0030404
FBgn0001189	CG3095	X	3038	1752	1592	1938	1930	1661	1609	2141	1904	1920	1857	1675	1866	0.0747009	0.740136	-0.133248	0.572448	-0.208924	0.150652	0.17452	0.71129	0.1045	0.992292	-0.00657582	0.990022	0.124711	0.808779	-0.0971032	0.796692	0.0886021	0.900541	-0.181156	0.692167	-0.199801	0.747166	-0.0352092	0.968684	-0.0297292	0.939478	-0.0779494	0.775329	0.313792	0.145886
FBgn0001197	CG5499	3R	1169	734	762	699	774	770	688	712	704	727	2195	722	786	-0.151099	0.530745	-0.139775	0.592001	0.0121442	0.970088	-0.146803	0.804497	-0.00440066	0.998294	0.581098	0.238826	0.573217	0.266659	0.0501675	0.937028	0.0290393	0.983398	0.591768	0.291301	0.0525418	0.994746	-0.493234	0.394774	-0.0983797	0.775175	0.654518	0.132816	-0.0180663	0.972456
FBgn0001202	CG10653	2L	2317	992	1120	1123	1098	1160	1111	977	1059	1044	1102	1072	1129	-0.0604558	0.829488	-0.00179593	0.996015	0.0596905	0.783174	-0.12189	0.858567	-0.0647224	0.998294	-0.154346	0.638938	-0.144398	0.766292	0.00898053	0.984186	-0.0572122	0.956629	-0.023932	0.979454	0.0718699	0.990049	0.0845746	0.914835	-0.0531738	0.88409	-0.0948347	0.735951	-0.129128	0.716718
FBgn0001206	CG1619	X	4696	198	120	117	139	164	115	193	139	158	562	130	129	-0.383148	0.353513	-0.26065	0.581549	0.129688	0.777422	-0.0138308	0.991676	0.271971	0.797388	0.625577	0.275369	0.616587	0.239096	0.0276694	0.976957	-0.0841554	0.960571	0.503091	0.453836	-0.277142	0.784163	-0.585595	0.237043	-0.346652	0.472843	0.818789	0.075911	0.235968	0.686504
FBgn0001215	CG9983	3R	2265	3717	4787	4917	4651	5093	4907	4702	4424	4529	4658	4230	4381	0.032487	0.923455	0.121266	0.680448	0.0914504	0.568487	0.0142484	0.989825	-0.0151737	0.998294	-0.0713032	0.853932	-0.18731	0.518172	-0.122238	0.606224	-0.218454	0.33087	-0.0858456	0.868914	-0.106067	0.932372	-0.0350054	0.956838	-0.093165	0.806242	-0.104716	0.584517	-0.107011	0.734874
FBgn0001218	CG4147	X	3185	18500	20400	14588	16462	16164	16819	9952	21483	12809	13260	20747	13974	-0.447757	0.00369413	-0.332568	0.0836047	0.115405	0.531946	-0.27954	0.703867	0.0233308	0.998294	-0.737046	5.38473e-06	-0.395275	0.0233863	0.152221	0.773358	0.0461904	0.976538	-0.284508	0.694015	0.0380731	0.996169	0.397354	0.327945	-0.257879	0.465104	-0.293132	0.0523687	-0.0280796	0.980709
FBgn0001220	CG8542	2R	2922	10080	12700	8541	8846	6925	7024	8397	10673	7863	7309	8531	7311	-0.506901	0.00463864	-0.781817	5.12562e-05	-0.282558	0.0227864	-0.292087	0.494779	0.15951	0.93029	-0.725046	0.0010423	0.0454554	0.943091	-0.102033	0.791316	0.149909	0.764411	-0.38594	0.261837	-0.254656	0.66683	0.10536	0.877777	-0.604587	0.00598848	-0.233667	0.211169	0.445168	0.05699
FBgn0001222	CG5748	2R	2897	1271	1242	1454	1406	1431	1687	1269	1282	1284	1926	1450	1450	0.0512543	0.835472	0.202129	0.45118	0.152872	0.506335	-0.0561475	0.936703	-0.102026	0.992292	0.143883	0.705408	-0.0415055	0.964635	0.0400305	0.937848	-0.110841	0.892185	0.190814	0.763166	0.139717	0.884281	-0.0666703	0.947389	0.0894718	0.766401	0.0966742	0.797041	-0.256467	0.40305
FBgn0001223	CG4460	3L	1900	2324	4197	1363	1371	1642	1867	1249	1328	1177	1139	1411	1450	-1.2656	7.68567e-07	-0.908137	0.00254146	0.38064	0.0233659	-1.10191	2.43456e-05	-0.0296482	0.998294	-1.46726	3.73226e-07	-0.605989	0.00889487	0.0821925	0.842004	-0.28062	0.331987	-0.230405	0.597809	0.10759	0.956978	0.324114	0.328557	-1.16174	3.76125e-05	-0.272058	0.225459	-0.403523	0.084168
FBgn0001224	CG4463	3L	884	38	1012	32	44	430	666	51	168	31	20	36	53	-0.51629	0.238305	-0.00909419	0.991208	3.33177	4.92871e-34	-0.148302	0.748033	0.469153	0.13834	-0.484494	0.271602	-2.74026	2.02345e-23	0.104667	NA	-2.31713	1.63985e-25	-0.759934	NA	-0.497115	0.268186	0.253451	0.758652	-0.462146	0.318314	-0.262319	0.679147	-0.914898	0.0636097
FBgn0001225	CG4183	3L	1010	305	4070	237	237	1649	2775	229	689	187	2833	262	470	-0.632539	0.175128	-0.0220781	0.97846	2.95262	6.91947e-37	-0.19189	0.676146	0.1974	0.887582	-0.102696	0.85416	-0.0784253	0.923163	0.429083	0.202379	-0.926233	0.000661742	0.164057	0.786251	-0.0805627	0.994439	-0.163619	0.754985	-0.48826	0.339557	0.369406	0.368446	-0.910887	0.0657442
FBgn0001226	CG4466	3L	1632	101	974	104	80	615	827	90	233	57	1683	86	276	-0.625228	0.206311	0.0922653	0.906136	2.72924	1.07068e-32	-0.188143	0.726255	0.352681	0.530015	0.0523533	0.933058	0.0116555	0.988311	0.39689	0.293462	-0.454603	0.176985	0.181262	0.720254	0.0211293	0.996169	-0.125689	0.795005	-0.338741	0.566208	0.319117	0.390471	-1.07993	0.02217
FBgn0001228	CG4456	3L	1900	2160	1546	1689	1818	2375	2323	1925	1757	2643	2395	2287	2358	-0.200927	0.460411	0.22788	0.427927	0.441749	0.000529008	-0.0782841	0.927867	0.109263	0.990251	0.243724	0.48429	0.027264	0.972774	0.398904	0.00228156	-0.0317927	0.976538	0.324637	0.359634	0.277226	0.318576	-0.0582626	0.943219	0.201708	0.553973	0.452325	0.0213822	-0.317816	0.123505
FBgn0001229	CG4190	3L	987	892	1415	992	1000	1456	1657	945	967	1230	1061	1483	1387	-0.323088	0.297119	0.302797	0.392351	0.654503	2.6451e-05	-0.288857	0.596917	-0.00627615	0.998294	-0.169435	0.721742	-0.449702	0.167521	0.505354	0.000169319	-0.121992	0.867495	0.145886	0.826055	0.498809	0.0082652	0.325665	0.438903	0.178955	0.68945	0.146574	0.660401	-0.646987	0.00121132
FBgn0001230	CG5436	3R	2231	28	155	88	84	769	1154	69	88	85	58	109	128	-0.082551	0.91945	1.12208	0.0379091	3.17252	1.47565e-41	-0.12382	0.921791	-0.044877	0.998294	-0.252798	0.72943	-2.66378	1.18743e-24	0.319474	0.450646	-2.21136	8.87841e-27	-0.119077	NA	0.372936	0.561294	0.390675	0.580395	0.0819926	0.928664	-0.190226	0.773139	-3.08817	2.11699e-33
FBgn0001233	CG1242	3L	2960	34072	73255	45796	41643	45519	72706	25169	44031	28495	23879	63483	22087	-0.298383	0.641785	0.0300802	0.970228	0.382241	0.422467	-0.263387	0.768316	-0.199367	0.953566	-0.772936	0.158722	-1.02758	6.45173e-05	-0.0015308	0.999665	-0.153147	0.892452	-0.402268	0.445899	0.0777816	0.994746	0.233279	0.794797	-0.228981	0.782513	-0.740776	9.73934e-06	-0.474131	0.480278
FBgn0001235	CG17117	3R	6557	8664	7990	9754	8788	11256	13589	8228	9054	9670	8777	11327	9308	0.0207311	0.934828	0.459158	0.0322406	0.441181	0.0103635	-0.0261223	0.976339	-0.0440344	0.998294	-0.0314427	0.935555	-0.455446	0.0852584	0.160212	0.621414	-0.248023	0.544111	-0.0030521	0.997908	0.196702	0.79682	0.191559	0.719883	0.187849	0.502097	-0.0497167	0.867023	-0.476509	0.0391281
FBgn0001247	CG5517	3L	3439	3117	3025	3070	3060	3293	3250	2978	3157	3102	3067	2974	3185	-0.134099	0.440733	-0.0132237	0.963375	0.121651	0.436997	-0.0776723	0.906114	0.0489661	0.998294	-0.170463	0.501957	-0.149192	0.696169	0.0278077	0.957521	-0.0978319	0.868923	-0.085826	0.886235	-0.0239892	0.996169	0.0488403	0.946698	-0.10652	0.695803	-0.0372781	0.885715	-0.0688016	0.855291
FBgn0001248	CG7176	3L	2026	20952	26429	14893	13933	21804	25567	17732	19936	20131	21350	19599	19562	-0.822409	6.71622e-07	-0.0976863	0.769466	0.728422	4.46865e-07	-0.366196	0.243371	0.396241	0.014323	-0.361054	0.14091	-0.251871	0.426119	0.442773	1.47131e-05	-0.26526	0.363511	0.0344124	0.958292	0.0218789	0.996169	-0.0245776	0.968684	-0.372209	0.11301	0.465995	7.85923e-06	-0.295288	0.286057
FBgn0001250	CG9623	X	5818	3476	3300	3853	3740	4829	5017	3591	3576	4343	3791	4180	4105	0.0298075	0.896851	0.424117	0.0155072	0.397993	0.00141213	-0.00170658	0.997631	-0.0289426	0.998294	0.0797538	0.819996	-0.316529	0.318815	0.141122	0.493615	-0.24785	0.290344	0.07956	0.910718	0.164332	0.777088	0.0704652	0.932627	0.171157	0.456843	0.0531585	0.869136	-0.42161	0.0195894
FBgn0001257	CG15009	3L	2355	1365	1887	533	533	1092	2012	555	2230	814	458	610	452	-1.64653	4.10322e-17	-0.141352	0.776238	1.15561	0.00471922	-0.0690073	0.957171	0.197552	0.800034	-1.27169	0.000175712	-0.89377	0.0158832	0.0149992	0.982563	-1.0538	2.76618e-05	-0.296438	0.680224	-0.253484	0.74826	-0.139462	0.914835	-1.57609	4.33349e-11	0.178123	0.746357	-0.0472833	0.967281
FBgn0001258	CG10160	3L	1778	514	387	113	189	94	70	99	148	98	50	86	90	-1.51695	4.12497e-08	-2.35231	1.19328e-20	-0.716993	0.0489533	-1.49244	1.40175e-09	-0.12385	0.998294	-2.10788	4.24011e-09	-0.0911252	0.943091	-0.442216	0.209776	0.0576423	0.976538	-0.411916	NA	-0.334731	0.681626	0.120438	0.929628	-2.22866	1.03773e-20	-0.609308	0.229689	0.502545	0.279076
FBgn0001276	CG13201	2R	727	130	125	148	161	174	164	168	149	167	212	143	160	0.13015	0.764827	0.276573	0.452784	0.144992	0.698499	0.182548	0.827819	0.0625934	0.998294	0.3114	0.54251	0.0619894	0.959662	-0.0042494	0.997716	-0.134429	0.898967	0.111872	0.92032	-0.0730524	0.994746	-0.177265	0.862873	0.120395	0.818407	0.192356	0.713175	-0.063577	0.924725
FBgn0001280	CG7933	3R	682	518	508	705	741	602	623	549	603	566	788	608	675	0.3484	0.0700532	0.145822	0.603978	-0.201753	0.330208	0.0750665	0.92467	-0.23635	0.613929	0.187058	0.637577	0.0502637	0.959606	-0.133498	0.739801	0.0417413	0.976538	0.104198	0.903969	0.106737	0.974662	-0.0108933	0.993604	0.197978	0.513953	-0.1398	0.712016	-0.0640026	0.898965
FBgn0001291	CG2275	2R	1565	1686	3014	869	1011	1625	1411	848	1485	891	911	908	998	-1.32126	3.80794e-07	-0.678319	0.0288235	0.696055	2.13785e-06	-0.767979	0.0244399	0.24585	0.850655	-1.37079	3.13705e-06	-0.75491	5.19222e-05	0.0374005	0.957625	-0.621698	9.56496e-05	-0.372029	0.532853	-0.2353	0.856721	0.121562	0.858957	-1.26057	6.16816e-06	-0.102862	0.759408	-0.308793	0.510331
FBgn0001296	CG12286	3R	2321	5704	6163	4663	4863	4554	4624	4818	5945	5667	4063	6000	3991	-0.441652	0.00158639	-0.462535	0.00786464	-0.0228952	0.915749	-0.198687	0.69321	0.198193	0.774497	-0.421953	0.184919	0.017098	0.98532	0.076101	0.92364	0.0857064	0.953405	-0.199632	0.766806	-0.107965	0.980696	0.0656731	0.955765	-0.335002	0.304567	-0.00559045	0.988455	0.237559	0.436761
FBgn0001297	CG33956	3R	4574	3174	4916	2205	2385	3220	3781	2422	3025	2193	2155	2092	2613	-0.891433	0.000100643	-0.289955	0.399989	0.621234	8.53294e-05	-0.529405	0.117473	0.254639	0.545356	-0.981679	0.000241175	-0.69345	0.000643301	0.0513391	0.933362	-0.510287	0.0215369	-0.382652	0.272578	-0.204919	0.824596	0.148694	0.813982	-0.818224	0.00270193	-0.120615	0.621395	-0.319422	0.304213
FBgn0001301	CG7210	2L	5476	1836	2547	3731	3271	2964	3330	3277	2248	2588	2866	2780	3815	0.51045	0.0228792	0.394583	0.152952	-0.116952	0.602144	0.199393	0.79483	-0.230136	0.798118	0.115975	0.766772	-0.265217	0.404543	-0.0548388	0.939557	0.0380099	0.979981	-0.104317	0.896865	0.174883	0.920595	0.286857	0.531387	0.431913	0.171943	-0.39734	0.0108631	-0.158036	0.744158
FBgn0001308	CG7765	2R	3718	3913	3932	4616	4556	5214	4813	3974	4102	4197	4714	4798	4498	0.0895093	0.632852	0.241678	0.18436	0.154408	0.246066	-0.0381043	0.962998	-0.121492	0.924289	-0.00430132	0.991165	-0.235266	0.327232	0.0401407	0.929443	-0.116817	0.815796	0.0360718	0.954869	0.157293	0.817915	0.112945	0.812816	0.126703	0.624345	-0.0914886	0.605801	-0.279506	0.156261
FBgn0001316	CG17046	3L	8706	3171	3559	3190	3170	3745	3527	3264	3254	3089	3382	2962	3133	-0.211102	0.24491	0.00463722	0.98908	0.218437	0.082308	-0.119083	0.840504	0.080812	0.998294	-0.234694	0.336472	-0.232389	0.361066	-0.0364843	0.937186	-0.25351	0.219395	-0.107098	0.812961	-0.118131	0.911391	-0.0266534	0.970423	-0.248393	0.291276	-0.025437	0.911729	-0.131236	0.648636
FBgn0001323	CG4761	3L	3909	82	47	58	84	222	196	77	56	301	164	227	282	0.0066237	0.992057	1.39281	2.00693e-05	1.39946	2.3351e-07	-0.022414	0.989825	-0.0214739	0.998294	1.14668	0.0145189	0.0620541	0.962126	1.23252	8.42242e-09	0.211632	0.759452	0.975448	0.0165995	1.33197	1.19807e-08	0.0955292	0.945222	1.57901	4.43052e-07	1.0668	0.00840587	-1.40114	4.69067e-07
FBgn0001324	CG8491	3L	7740	800	753	1040	924	1081	998	1010	928	1040	993	970	942	0.198036	0.358951	0.304702	0.143121	0.107318	0.617147	0.213847	0.600255	0.0283364	0.998294	0.192933	0.554078	-0.0939294	0.895351	-0.0140089	0.979774	-0.124932	0.834867	-0.026132	0.977885	-0.0450377	0.994746	-0.0299997	0.97543	0.17885	0.518887	0.00312842	0.992861	-0.0757352	0.85137
FBgn0001330	CG3228	X	3927	187	88	101	93	172	100	124	148	185	269	155	118	-0.513004	0.256282	-0.105107	0.871001	0.431572	0.276739	-0.0595165	0.968984	0.347701	0.512019	0.387936	0.50476	0.423172	0.501468	0.338292	0.408381	-0.000852669	0.99863	0.445386	0.473239	-0.0182488	0.996169	-0.41926	0.511964	-0.0940353	0.898504	0.898886	0.0122484	0.0272833	0.975039
FBgn0001341	CG6189	X	3680	261	201	178	170	162	125	156	200	220	294	216	197	-0.497054	0.0852091	-0.728033	0.0161949	-0.230671	0.512013	-0.357182	0.464425	0.05971	0.998294	-0.0321096	0.963305	0.550836	0.240325	0.208554	0.66643	0.388768	0.31675	0.310332	0.662619	0.137095	0.974662	-0.180659	0.853628	-0.248206	0.551785	0.418432	0.293836	0.294119	0.554151
FBgn0001404	CG9659	X	3595	6510	8279	4899	5533	6299	5639	5191	6483	6031	5745	5754	4479	-0.613403	0.000953926	-0.401781	0.0692412	0.217172	0.144912	-0.365436	0.300511	0.182625	0.87049	-0.482988	0.0524043	-0.0849353	0.878546	-0.00364344	0.996745	-0.207941	0.634412	-0.078972	0.915746	-0.183868	0.884281	-0.12919	0.855601	-0.604421	0.0134036	0.12323	0.605264	-0.00709372	0.989649
FBgn0001491	CG1639	X	934	427	365	490	426	420	452	413	366	494	487	492	484	0.0726341	0.835741	0.034778	0.929131	-0.0375337	0.912605	-0.0922064	0.91788	-0.148385	0.979311	0.113949	0.799484	0.0798528	0.932969	0.0988268	0.865754	0.123281	0.881441	0.199401	0.765282	0.252687	0.653268	0.040421	0.970423	0.177647	0.60502	0.0463025	0.917537	-0.133996	0.768214
FBgn0001565	CG1666	X	2116	1949	1826	2825	2852	2652	2023	2977	2266	2826	3014	2446	2601	0.445197	0.00112903	0.190478	0.449682	-0.249138	0.162461	0.344118	0.289304	-0.054276	0.998294	0.426393	0.0317641	0.228337	0.549693	-0.138313	0.556221	0.0870398	0.927778	0.0500347	0.951322	-0.0730586	0.994439	-0.143425	0.740946	0.295031	0.141961	-0.00911755	0.969548	0.177255	0.670016
FBgn0001612	CG10988	X	3571	211	264	315	267	483	473	316	294	483	750	426	341	0.145292	0.70136	0.849699	0.000360261	0.708941	0.000195741	0.228295	0.718699	0.0938607	0.998294	1.01373	0.00211416	0.226909	0.72916	0.333725	0.281413	-0.279027	0.493007	0.725637	0.0351412	0.243267	0.776607	-0.453991	0.36852	0.523389	0.0922859	0.869374	0.00273805	-0.586896	0.00886355
FBgn0001624	CG1725	X	7249	1391	1230	1790	1637	1584	1531	1813	1354	1443	1611	1529	1590	0.246101	0.187813	0.140005	0.564993	-0.105978	0.574581	0.164355	0.807353	-0.052101	0.998294	0.0318297	0.938436	-0.0986174	0.860987	-0.104472	0.773397	-0.0145523	0.99258	-0.136433	0.836416	-0.0440297	0.994746	0.081924	0.905139	0.132526	0.647047	-0.209169	0.315722	0.0407045	0.94405
FBgn0001941	CG9078	2L	1784	7272	8492	9227	9373	8875	8087	8504	9518	9030	8350	9593	9422	0.100465	0.65776	-0.00235569	0.994971	-0.103752	0.464483	0.0984138	0.891725	0.00638672	0.998294	-0.0399143	0.919166	-0.0327931	0.960452	0.0523075	0.890869	0.139663	0.69275	-0.138953	0.783641	0.0413032	0.994746	0.16942	0.690765	0.148917	0.603304	-0.138189	0.520201	0.106675	0.755751
FBgn0001942	CG9075	2L	2021	36003	38839	37980	37156	39805	40364	36702	38490	39288	38991	40059	38601	-0.126603	0.478941	-0.00547269	0.985447	0.122122	0.405481	-0.0708366	0.91813	0.0496196	0.998294	-0.11567	0.653083	-0.10369	0.800489	0.0852701	0.754724	-0.0428909	0.96475	-0.0397008	0.948242	0.0309975	0.994746	0.0591656	0.929098	-0.0415993	0.894671	0.0112491	0.959598	-0.0693037	0.848039
FBgn0001961	CG8978	2L	1732	4072	4294	3398	3593	3366	3008	3135	3815	3094	3033	3012	3049	-0.384818	0.00723985	-0.487551	0.00298838	-0.104132	0.52667	-0.312826	0.327321	0.0385266	0.998294	-0.607656	0.00113239	-0.120554	0.791466	-0.172605	0.372329	-0.0824166	0.894588	-0.256584	0.535723	-0.202132	0.777825	0.0365958	0.961648	-0.56103	0.000554142	-0.229553	0.218995	0.141539	0.704677
FBgn0001965	CG7793	2L	5635	1494	1622	1530	1513	1689	1494	1593	1521	1613	1529	1483	1333	-0.164475	0.410264	-0.0752226	0.780691	0.0901612	0.630319	-0.0775818	0.914952	0.0772819	0.998294	-0.16184	0.605039	-0.0816565	0.906626	-0.0811513	0.863378	-0.173835	0.684481	-0.0779923	0.911713	-0.157797	0.8619	-0.0918907	0.913042	-0.249573	0.321435	-0.00013907	0.999633	-0.00803594	0.988109
FBgn0001970	CG7480	2L	2160	135	113	111	77	188	159	112	86	197	244	109	100	-0.460822	0.240081	0.344897	0.346759	0.802821	0.00761053	-0.301766	0.639348	0.0697807	0.998294	0.527625	0.244925	0.199584	0.814839	0.107774	0.913946	-0.552148	0.0680626	0.740957	0.0854242	0.0325982	0.996169	-0.677758	0.0797311	-0.314151	0.493098	0.885233	0.017773	-0.681628	0.0387777
FBgn0001974	CG3688	2L	1769	169	154	189	182	201	192	166	179	203	325	221	196	0.0610619	0.889012	0.165007	0.662543	0.104065	0.777422	0.0104859	0.992503	-0.0386071	0.998294	0.418463	0.3816	0.243052	0.754494	0.148354	0.813257	0.0544977	0.975089	0.360955	0.593197	0.188959	0.907019	-0.180734	0.86103	0.231895	0.582198	0.354922	0.44007	-0.14953	0.779812
FBgn0001977	CG4180	2L	2358	954	889	793	776	747	640	746	751	659	729	687	655	-0.354976	0.0409161	-0.500097	0.0108555	-0.146695	0.484425	-0.346573	0.205781	-0.013866	0.998294	-0.560723	0.019881	-0.0654714	0.939087	-0.182406	0.525638	-0.0554278	0.964094	-0.190941	0.714115	-0.167672	0.850439	0.00885349	0.993873	-0.546653	0.00486987	-0.214632	0.423366	0.127461	0.739037
FBgn0001978	CG3647	2L	4145	1742	1773	1534	1543	1592	1396	1527	1674	1476	2064	1521	1417	-0.318678	0.0380779	-0.332853	0.0775072	-0.0150418	0.952598	-0.198382	0.628195	0.0979269	0.998294	-0.173925	0.595069	0.144596	0.811906	-0.0402693	0.940246	-0.0360098	0.976538	0.030364	0.97488	-0.138877	0.909016	-0.1756	0.789699	-0.359225	0.0699612	0.134004	0.664263	0.118068	0.744599
FBgn0001981	CG3758	2L	2273	80	87	283	327	205	193	256	217	164	138	245	268	1.58413	5.86127e-11	1.04573	0.000252961	-0.550497	0.0173222	1.11327	1.07988e-05	-0.24093	0.797388	0.515229	0.321259	-0.332065	0.615033	-0.183782	0.699689	0.283539	0.522649	-0.54433	0.298019	0.0694292	0.994746	0.56388	0.20636	1.34975	2.50273e-07	-0.86234	0.00825404	0.245361	0.570843
FBgn0001986	CG4152	2L	3585	407	315	468	449	478	374	448	465	483	585	472	424	0.200509	0.501252	0.122087	0.741696	-0.0775404	0.798756	0.219561	0.70997	0.0387889	0.998294	0.33689	0.374744	0.210394	0.733788	-0.00872062	0.989413	0.0501581	0.975089	0.104168	0.899384	-0.0499218	0.994746	-0.158651	0.842521	0.1852	0.631204	0.151542	0.671587	0.117218	0.806546
FBgn0001987	CG3903	2L	4468	1437	2635	971	1103	1323	1233	939	1245	855	724	854	917	-1.00217	0.00029665	-0.711532	0.0239339	0.320525	0.0467189	-0.733183	0.0242551	0.102107	0.998294	-1.32397	2.7572e-05	-0.669133	0.0068095	-0.183897	0.539498	-0.497403	0.00271801	-0.471576	0.268844	-0.278392	0.633976	0.181543	0.803605	-1.16465	5.93955e-05	-0.396726	0.162263	-0.188454	0.641292
FBgn0001989	CG13240	2L	992	2909	2940	2599	2798	2332	2185	2587	2740	2548	2464	2338	2565	-0.244548	0.126465	-0.467461	0.00405622	-0.224014	0.113972	-0.200631	0.583283	0.0302325	0.998294	-0.388812	0.0752579	0.072423	0.910577	-0.107607	0.7537	0.0933445	0.885049	-0.173549	0.69149	-0.137555	0.892887	0.0206128	0.981893	-0.35636	0.0611412	-0.147616	0.521302	0.250638	0.262825
FBgn0001990	CG4148	2L	2033	364	393	598	520	486	471	443	490	502	555	508	515	0.407499	0.0645824	0.221904	0.424379	-0.18716	0.424216	0.189969	0.748701	-0.172174	0.930009	0.267938	0.458152	0.0577663	0.945052	-0.0913737	0.875944	0.0692491	0.954265	0.0661407	0.944401	0.0870485	0.982707	0.00963263	0.993732	0.301969	0.279626	-0.120989	0.747199	-0.0136719	0.981879
FBgn0001991	CG4894	2L	9425	52	56	55	48	39	32	50	41	42	34	44	46	-0.163725	0.784176	-0.5758	0.245766	-0.392953	0.437207	-0.205036	0.841643	-0.0590752	0.998294	-0.409115	0.527785	0.0127524	0.990027	-0.0856252	NA	0.163705	0.894545	-0.154274	NA	-0.0249533	0.996169	0.108815	0.935461	-0.29525	0.631204	-0.257263	0.69111	0.276607	0.713836
FBgn0001992	CG4163	2L	2787	96	84	99	90	74	96	89	91	96	104	90	86	-0.0550085	0.924017	-0.157308	0.768333	-0.100581	0.853103	-0.0599766	0.966157	-0.0112377	0.998294	-0.0255805	0.977718	0.0891361	0.943091	-0.0512547	0.960875	0.0173933	0.993685	0.0316043	NA	-0.0434267	0.996169	-0.0720756	0.960812	-0.124347	0.835893	0.0223291	0.972616	0.0810094	0.923593
FBgn0001994	CG7664	2L	4402	1983	1513	1740	1770	2246	1781	2039	1897	2223	2471	1958	1775	-0.121352	0.653475	0.0910493	0.782911	0.21674	0.22014	0.0790967	0.921791	0.19721	0.598797	0.22482	0.462233	0.135971	0.788026	0.103422	0.784812	-0.108744	0.887722	0.141683	0.755369	-0.0964206	0.973053	-0.249005	0.476301	-0.0160167	0.976704	0.356375	0.0178277	-0.00695647	0.989649
FBgn0001995	CG5818	2L	1012	826	962	851	890	913	845	857	833	850	884	820	923	-0.16706	0.499067	-0.12695	0.650509	0.0410508	0.870095	-0.147583	0.816807	0.00791729	0.998294	-0.21542	0.515218	-0.0854025	0.906052	0.0217136	0.973262	-0.026311	0.984631	-0.0580564	0.94024	0.0114895	0.996169	0.0562158	0.949929	-0.144294	0.678535	-0.0522139	0.878356	-0.033038	0.945464
FBgn0002021	CG10655	2L	1708	857	1048	896	897	811	769	783	911	866	941	855	907	-0.21379	0.379573	-0.361063	0.133195	-0.149685	0.436968	-0.218982	0.689353	-0.0250759	0.998294	-0.245886	0.456721	0.106605	0.873669	-0.00220099	0.999241	0.126496	0.839782	-0.0092628	0.996197	0.0212587	0.996169	0.0191091	0.985241	-0.215836	0.494538	-0.0375589	0.908439	0.116405	0.779661
FBgn0002022	CG10449	2L	1698	2108	2500	2238	2122	2189	2126	2130	2245	2150	2214	2022	2221	-0.208337	0.324973	-0.194386	0.431661	0.0141407	0.953003	-0.142575	0.816807	0.0519857	0.998294	-0.251107	0.36435	-0.0550245	0.930988	-0.0153679	0.976957	-0.0388611	0.973858	-0.0978004	0.861514	-0.0689745	0.988669	0.0142876	0.98768	-0.223869	0.422138	-0.0460433	0.863866	0.0400061	0.924728
FBgn0002023	CG10699	2L	3643	297	287	320	313	325	274	349	327	331	296	329	299	-0.0168067	0.965212	-0.0679559	0.855391	-0.0504991	0.883391	0.110519	0.891725	0.119636	0.998294	-0.0687698	0.903656	-0.00176277	0.998188	0.00982581	0.988832	0.0445988	0.976538	-0.167136	0.836204	-0.114709	0.974662	0.0423759	0.97385	-0.00827261	0.990204	-0.0506309	0.921139	0.183946	0.658754
FBgn0002031	CG10691	2L	2022	4440	5047	3911	4069	4148	4473	3776	4094	4006	4265	4037	4332	-0.374459	0.0196089	-0.233517	0.321117	0.140031	0.436774	-0.320172	0.268699	0.029453	0.998294	-0.369436	0.087292	-0.12934	0.759947	0.0860297	0.799795	-0.0575159	0.956629	-0.0289276	0.966749	0.0515327	0.994439	0.0697762	0.907744	-0.284767	0.20528	0.00146284	0.995346	-0.106974	0.775084
FBgn0002036	CG10561	2L	2052	487	573	566	556	677	559	519	473	659	661	655	576	-0.0509028	0.880267	0.106069	0.746753	0.159407	0.486279	-0.157109	0.817163	-0.107596	0.998294	0.11977	0.773753	0.0207975	0.982164	0.137429	0.7537	-0.0170022	0.993536	0.274377	0.57171	0.241299	0.687021	-0.0375867	0.972684	0.0943716	0.816398	0.17255	0.581204	-0.275143	0.358704
FBgn0002044	CG10084	2L	4151	2890	3127	3143	3057	3317	3034	3130	3392	3011	3419	3082	2711	-0.0894675	0.672037	-0.0287189	0.91966	0.0616407	0.727282	0.0301519	0.974321	0.114156	0.978811	-0.0897452	0.754777	-0.0558031	0.921538	-0.0687635	0.886549	-0.135544	0.795021	-0.117133	0.807915	-0.180716	0.813534	-0.0830519	0.905139	-0.162437	0.569364	0.000340501	0.999584	0.0592402	0.879047
FBgn0002069	CG3821	2R	2246	4748	4613	3791	4264	4333	3415	3585	4740	3882	3676	3504	3935	-0.342242	0.0250822	-0.371578	0.0557642	-0.0310562	0.906565	-0.219196	0.663898	0.0830424	0.998294	-0.470824	0.0196851	-0.0949561	0.883397	-0.0848668	0.851388	-0.0645527	0.954494	-0.212331	0.690093	-0.164932	0.907019	0.0279496	0.97385	-0.430608	0.0161586	-0.132271	0.588714	0.122266	0.79918
FBgn0002121	CG2671	2L	5528	3547	3610	5179	5250	3196	3133	4407	3520	2367	4197	3205	4350	0.401039	0.00213911	-0.275729	0.133709	-0.679807	7.72146e-11	0.0562211	0.943934	-0.300864	0.256571	-0.297481	0.420095	-0.0330852	0.974216	-0.38549	0.0568384	0.203679	0.690778	-0.321743	0.561969	-0.0827721	0.994439	0.209559	0.802981	-0.0347348	0.942095	-0.660025	0.0102033	0.326731	0.180501
FBgn0002174	CG5504	2R	1959	1420	1753	1160	1210	966	1116	1273	1510	1200	1293	1312	1239	-0.534536	0.00452373	-0.675272	0.00296116	-0.148128	0.52259	-0.236781	0.62797	0.245046	0.54943	-0.502311	0.0516721	0.160946	0.771388	0.118775	0.731094	0.237995	0.529811	-0.236573	0.599849	-0.137677	0.926012	0.0829045	0.914835	-0.407767	0.0922279	0.0214225	0.94464	0.407318	0.12722
FBgn0002183	CG1828	3L	3690	974	820	1065	1115	827	664	1031	909	897	1802	824	958	0.14318	0.553656	-0.359733	0.132975	-0.506153	0.00147774	0.0268699	0.979006	-0.102661	0.998294	0.330076	0.457638	0.579104	0.167521	-0.240556	0.316848	0.211098	0.646578	0.27493	0.69824	-0.133976	0.931603	-0.3712	0.549146	-0.116194	0.746027	0.198961	0.671309	0.381321	0.121676
FBgn0002283	CG4195	3L	1404	323	325	338	350	383	340	325	352	341	432	313	397	-0.0453713	0.898624	0.0480815	0.895801	0.0943978	0.748729	-0.0168885	0.989825	0.0236516	0.998294	0.0559506	0.919079	0.0141647	0.988682	0.0548617	0.947438	-0.0351047	0.983608	0.0695113	0.94733	0.0292783	0.996169	-0.0472433	0.970423	0.0159605	0.980663	0.0997994	0.823322	-0.0661198	0.904594
FBgn0002284	CG4097	3L	944	2302	2304	2037	2069	1679	1723	1780	1852	1762	2177	1880	1922	-0.293512	0.048628	-0.52605	0.00223947	-0.235554	0.118724	-0.391989	0.0738717	-0.11365	0.978811	-0.398655	0.070907	0.119457	0.826318	-0.0827324	0.825635	0.129832	0.803929	0.00943595	0.994576	0.0313459	0.994746	0.00958568	0.992539	-0.378294	0.0359819	-0.1104	0.651735	0.109844	0.758014
FBgn0002306	CG2507	3R	6236	58	48	36	49	43	48	52	42	61	40	35	34	-0.351033	0.515792	-0.262802	0.641663	0.0988707	0.880923	-0.157536	0.891725	0.0841474	0.998294	-0.143385	0.860482	0.0358889	0.979848	-0.119674	NA	-0.207882	0.844994	0.00751634	NA	-0.242762	0.884816	-0.176137	0.870659	-0.555006	0.291469	0.107838	0.88277	0.0482844	0.964079
FBgn0002354	CG7620	3R	551	281	258	254	206	369	340	266	244	387	304	310	295	-0.337489	0.247206	0.274664	0.337526	0.612918	0.00543897	-0.138464	0.863785	0.150433	0.992292	0.156556	0.763358	-0.0805652	0.940815	0.331876	0.282543	-0.208305	0.693286	0.267977	0.709105	0.178562	0.893174	-0.104449	0.932627	0.0496617	0.916748	0.446231	0.271069	-0.420267	0.126515
FBgn0002413	CG2048	3R	4156	2130	1997	1946	1940	2156	1984	1818	2134	1889	3136	1972	1938	-0.21562	0.190021	-0.0991438	0.673359	0.117235	0.470182	-0.129721	0.835701	0.0675979	0.998294	0.0762126	0.871217	0.162502	0.814839	0.0299028	0.953843	-0.0916525	0.883657	0.193231	0.777596	-0.0421529	0.994746	-0.237079	0.720853	-0.185133	0.436653	0.276476	0.403873	-0.0412592	0.933535
FBgn0002431	CG9484	3R	9083	6098	5787	6601	6216	7126	6323	6219	5904	6157	6377	6150	5553	-0.024484	0.916416	0.06941	0.769072	0.0951122	0.550426	-0.0506948	0.937881	-0.0263258	0.998294	-0.104915	0.67259	-0.166337	0.588161	-0.100562	0.76627	-0.198923	0.50473	-0.0499131	0.93047	-0.074352	0.980613	-0.0389829	0.955557	-0.131215	0.620834	-0.079369	0.686764	-0.122271	0.679369
FBgn0002441	CG5954	3R	5398	1167	1267	1177	1212	1266	983	1258	1364	1276	1611	1063	960	-0.156954	0.461626	-0.216601	0.403893	-0.0609293	0.812699	0.0217382	0.983107	0.166124	0.840555	0.0505545	0.899935	0.251766	0.564312	-0.196838	0.440183	-0.144173	0.837341	0.0282465	0.97488	-0.359108	0.177599	-0.39568	0.213724	-0.36444	0.104498	0.206309	0.404494	0.234255	0.458974
FBgn0002521	CG17743	4	2381	890	737	1118	963	1028	1031	956	822	956	1364	1118	1103	0.212857	0.379687	0.22711	0.375285	0.0144177	0.961893	0.0399592	0.968984	-0.149081	0.969455	0.290789	0.401448	0.0756054	0.930988	0.105372	0.817811	0.0827814	0.921907	0.237315	0.671809	0.256985	0.544672	0.00246657	0.999341	0.320575	0.189063	0.0889381	0.822909	-0.181928	0.589385
FBgn0002524	CG4162	2L	2991	1683	2289	1443	1513	1905	1785	1350	1661	1466	1769	1644	1604	-0.534406	0.0132502	-0.204123	0.494674	0.341305	0.00983383	-0.406423	0.260662	0.0676537	0.998294	-0.45158	0.130088	-0.249613	0.432845	0.147549	0.568707	-0.185651	0.54611	-0.00331806	0.998112	0.066635	0.994439	0.0609156	0.941039	-0.380888	0.171943	0.0726309	0.795436	-0.254574	0.393269
FBgn0002525	CG6944	2L	3504	605	628	503	440	650	523	607	714	867	1390	535	496	-0.499775	0.0108851	-0.174415	0.532899	0.325102	0.129023	0.015011	0.989825	0.440601	0.061777	0.604927	0.0577367	0.703104	0.0228956	0.130797	0.791316	-0.172155	0.778248	0.540945	0.174702	-0.331245	0.378775	-0.828216	0.0023971	-0.35371	0.146991	1.04762	3.15669e-05	0.184338	0.645837
FBgn0002526	CG10236	3L	11690	703	726	930	912	1045	950	947	926	865	721	828	910	0.224741	0.259685	0.362042	0.0743548	0.139407	0.458897	0.277781	0.380554	0.0677722	0.998294	-0.0259271	0.961651	-0.344532	0.402703	-0.0554937	0.926612	-0.194398	0.611293	-0.289901	0.559649	-0.124482	0.931343	0.151476	0.851834	0.160337	0.600175	-0.234917	0.475316	-0.0653006	0.87314
FBgn0002542	CG2684	3R	3543	110	138	136	119	182	122	124	137	149	1001	153	172	-0.084845	0.869706	0.159068	0.743184	0.243699	0.542199	-0.007859	0.994154	0.0576791	0.998294	0.576539	0.303807	0.307745	0.565712	0.26868	0.542543	0.0609153	0.975089	0.371779	0.513806	0.212932	0.883672	-0.249896	0.655874	0.241767	0.611923	0.489687	0.285268	-0.163346	0.802155
FBgn0002543	CG5481	2L	6206	161	141	364	326	201	211	246	196	106	96	236	282	0.987032	1.35082e-05	0.319033	0.358884	-0.670329	0.00181615	0.373033	0.39625	-0.449077	0.1101	-0.598123	0.211848	-0.765246	0.048624	-0.316222	0.299336	0.246837	0.662804	-0.86762	0.0235809	0.153865	0.953806	0.946427	0.00215867	0.603508	0.0429572	-1.49897	7.16748e-08	0.10777	0.856634
FBgn0002552	CG11770	2R	3654	643	709	671	702	715	676	654	749	689	1016	617	702	-0.108371	0.684324	-0.0632284	0.840681	0.045973	0.861837	-0.0260242	0.980573	0.0712458	0.998294	0.12438	0.773878	0.176942	0.791466	-0.0313364	0.962662	-0.0833067	0.937036	0.1421	0.86083	-0.104269	0.977793	-0.245388	0.707428	-0.142804	0.681454	0.226812	0.515686	0.033202	0.953245
FBgn0002566	CG18028	2L	5316	1199	1210	2548	2239	1865	1685	2003	1591	1747	1715	2084	2050	0.832338	7.02056e-09	0.439723	0.0127802	-0.393961	0.00485175	0.438362	0.0913956	-0.306985	0.318163	0.322403	0.203299	-0.100208	0.868226	-0.173656	0.481255	0.188469	0.534806	-0.136478	0.826055	0.150133	0.909016	0.28538	0.36852	0.642068	9.69611e-05	-0.490806	0.00504431	0.0372286	0.944469
FBgn0002567	CG8024	2R	2771	7996	10126	7182	7083	10026	9848	7505	8498	9672	8162	9323	8032	-0.463885	0.0116968	0.0253607	0.940643	0.500558	1.11427e-06	-0.231668	0.618196	0.197398	0.629521	-0.189388	0.582079	-0.205741	0.613888	0.282904	0.0891181	-0.194083	0.566229	0.0550302	0.947511	0.0754974	0.988669	0.0106242	0.992539	-0.168424	0.619505	0.265633	0.244089	-0.278574	0.218932
FBgn0002579	CG7622	X	592	14716	11843	15016	15525	12898	11919	14649	9898	14184	13472	13795	13947	0.0671247	0.79384	-0.196503	0.403734	-0.267608	0.0149737	-0.166758	0.82206	-0.212061	0.840555	-0.116514	0.707764	0.0802476	0.880197	-0.110691	0.615725	0.135878	0.693286	0.0669335	0.938979	0.121174	0.974662	0.0547352	0.935461	-0.0473436	0.893405	-0.183735	0.309542	0.00390839	0.992937
FBgn0002590	CG8922	X	1380	19453	19644	23436	24196	20848	20093	21233	19291	21746	19665	22025	22223	0.148067	0.343208	-0.0383098	0.876133	-0.186637	0.122062	-0.0299278	0.97078	-0.167716	0.686992	-0.0938813	0.750642	-0.050584	0.9399	-0.0798669	0.778771	0.0891318	0.865099	-0.0600802	0.930096	0.0886483	0.970023	0.136776	0.788387	0.0625696	0.820963	-0.23744	0.213937	0.00592267	0.989649
FBgn0002593	CG4087	2L	768	29276	26451	31123	32183	26793	26675	30165	26544	30301	27064	30195	31184	0.0496742	0.816848	-0.159734	0.444216	-0.210508	0.0869222	-0.0534423	0.938124	-0.0982235	0.992292	-0.131696	0.650274	0.0285301	0.9662	-0.020879	0.961278	0.169639	0.544111	-0.0726659	0.915207	0.076425	0.978393	0.137653	0.793259	0.0253251	0.942095	-0.179137	0.404451	0.100821	0.766412
FBgn0002607	CG2746	2R	1361	28960	28799	30186	31336	26937	26666	29356	26445	27511	26610	28194	29389	-0.0422836	0.83885	-0.207873	0.264486	-0.166475	0.203329	-0.124082	0.81063	-0.0822895	0.998294	-0.267627	0.203072	-0.0563475	0.919913	-0.0694562	0.83352	0.0798721	0.892185	-0.13377	0.763887	0.0133049	0.996169	0.135442	0.745424	-0.115325	0.635765	-0.22566	0.150595	0.0753802	0.831315
FBgn0002622	CG6779	3R	1133	28684	24918	29030	30836	24461	25046	28834	23241	26292	25521	26462	27628	0.0258872	0.919093	-0.211622	0.321445	-0.239194	0.0691853	-0.112586	0.869152	-0.132008	0.977693	-0.222265	0.347464	-0.00798018	0.988682	-0.117626	0.604973	0.101386	0.848756	-0.0966131	0.877359	0.0217851	0.996169	0.109801	0.812689	-0.0966237	0.734337	-0.248493	0.11077	0.0870452	0.834642
FBgn0002626	CG7939	3R	747	21594	16637	26607	28695	18640	19737	24572	18325	20815	19641	23294	24585	0.386711	0.0377667	-0.0920466	0.763207	-0.485286	0.000110125	0.0714633	0.936049	-0.266324	0.504149	-0.0933825	0.783138	0.00205093	0.996871	-0.175401	0.327123	0.276526	0.191341	-0.162646	0.769603	0.110677	0.974662	0.277072	0.299655	0.20296	0.478974	-0.481085	0.000582067	0.1667	0.674009
FBgn0002638	CG10480	3L	2365	680	696	897	914	796	819	826	875	819	2286	821	938	0.25392	0.189026	0.122232	0.65394	-0.130871	0.531171	0.200705	0.659779	-0.0336757	0.998294	0.760615	0.0831887	0.555805	0.2783	-0.0175603	0.977541	0.0920313	0.920783	0.497139	0.419415	0.0143034	0.996169	-0.438706	0.489375	0.22835	0.412963	0.522885	0.240898	0.0904383	0.830583
FBgn0002641	CG1692	X	3209	1297	1099	1001	958	1009	790	983	1082	946	975	956	881	-0.40962	0.0218026	-0.501127	0.022089	-0.0950696	0.701497	-0.264066	0.479731	0.112873	0.992292	-0.472953	0.0613489	0.0212158	0.980481	-0.0630353	0.914525	0.0151891	0.993536	-0.186202	0.715123	-0.176747	0.835394	-0.0066817	0.995935	-0.472781	0.0258045	-0.0733093	0.814792	0.212407	0.535445
FBgn0002643	CG8118	2R	7884	498	426	382	464	716	535	449	416	397	550	471	544	-0.245747	0.37415	0.309468	0.272945	0.55446	0.0101891	-0.155321	0.816807	0.0672501	0.998294	-0.141872	0.75241	-0.393535	0.393188	0.236624	0.499766	-0.262906	0.540035	0.0177834	0.991137	0.170103	0.885861	0.130227	0.89607	0.0210326	0.968255	0.090593	0.853171	-0.469016	0.0721497
FBgn0002645	CG1483	3R	5818	1152	1234	1689	1724	321	301	1211	1099	625	1262	874	1011	0.371659	0.0208921	-1.97024	1.1519e-30	-2.35963	3.43734e-74	-0.118733	0.852929	-0.459198	0.00315527	-0.47089	0.251333	1.10202	0.000297136	-0.757621	7.3803e-09	1.37819	5.64036e-18	-0.318021	0.629799	-0.285813	0.437651	0.051221	0.970423	-0.433833	0.0464308	-0.780079	0.0121853	1.81229	2.16012e-27
FBgn0002707	CG3697	X	3606	153	140	240	197	248	274	196	219	191	377	262	232	0.405546	0.191548	0.678297	0.0157212	0.267276	0.384804	0.34035	0.46477	-0.0159785	0.998294	0.584842	0.232182	0.0167726	0.988682	0.154666	0.799801	-0.0795019	0.957501	0.224505	0.80948	0.174565	0.91613	-0.077156	0.955557	0.582984	0.0488022	0.229533	0.682511	-0.281981	0.492321
FBgn0002715	CG5303	2R	1594	32	38	42	39	45	29	35	32	40	143	48	36	0.0565828	0.94016	-0.0260479	0.974575	-0.0803265	0.908958	-0.0797666	NA	-0.0912703	0.998294	0.597604	0.327257	0.410244	0.519799	0.0341532	NA	0.0795357	0.971849	0.479572	NA	0.143024	0.978322	-0.304848	0.67876	0.10761	0.893113	0.486869	0.376264	-0.0789902	0.941859
FBgn0002716	CG7753	2R	2300	107	79	155	118	155	156	166	78	142	208	92	85	0.364847	0.377747	0.572184	0.110012	0.195986	0.619665	0.187223	0.865381	-0.0541586	0.998294	0.54896	0.283421	0.0584973	0.962571	-0.390735	0.282044	-0.600624	0.0424252	0.235909	0.81194	-0.265759	0.848148	-0.547485	0.299437	-0.154695	0.799723	0.223875	0.689995	-0.261899	0.703735
FBgn0002719	CG10120	3R	2906	36299	38274	39019	41104	25168	31889	33313	43054	27630	27988	38508	37265	-0.0303437	0.89407	-0.463856	0.043533	-0.436369	0.0169367	-0.0419153	0.96812	-0.0135618	0.998294	-0.588853	0.000268382	-0.105845	0.877305	-0.0547895	0.887441	0.333952	0.246181	-0.508357	0.047425	-0.0379441	0.994746	0.477043	0.000571838	-0.0887865	0.744504	-0.562769	1.34249e-07	0.401042	0.189743
FBgn0002723	CG1705	X	5088	699	616	716	800	728	797	720	631	652	725	671	855	0.0693299	0.817484	0.107189	0.728744	0.0387961	0.898705	-0.0391443	0.968984	-0.0977153	0.998294	-0.112172	0.767908	-0.200389	0.694846	0.0267034	0.971197	-0.0169115	0.993536	-0.0665799	0.935675	0.120887	0.970023	0.172577	0.812816	0.094902	0.815535	-0.177557	0.550945	-0.147234	0.717196
FBgn0002736	CG9401	2R	1103	431	421	530	509	493	595	426	388	518	665	536	588	0.146141	0.574296	0.238864	0.43424	0.0954833	0.760557	-0.131371	0.854063	-0.25312	0.582426	0.257073	0.478173	0.0289923	0.97862	0.119804	0.799801	0.0205265	0.99258	0.370326	0.419415	0.374341	0.213944	-0.00971793	0.99421	0.270653	0.334836	0.119873	0.752753	-0.370573	0.232074
FBgn0002772	CG5596	3R	1414	322	249	222	329	248	259	296	268	274	231	220	321	-0.165335	0.695863	-0.255427	0.453189	-0.0815673	0.853103	-0.0829384	0.929778	0.0588382	0.998294	-0.300812	0.525648	-0.0578964	0.960452	-0.0035519	0.999241	0.0551015	0.976538	-0.198122	0.810847	-0.0692672	0.994746	0.0994662	0.941039	-0.169668	0.735154	-0.133003	0.817964	0.159053	0.738799
FBgn0002773	CG2184	3R	2286	1117	1056	1651	1710	1083	1065	1236	1254	1115	1040	937	1401	0.483019	0.00106105	-0.117795	0.637396	-0.60258	1.89932e-06	0.104028	0.870917	-0.344523	0.0510915	-0.182	0.570061	-0.0607658	0.940725	-0.408491	0.096425	0.0833736	0.954265	-0.277078	0.503357	-0.0988968	0.984115	0.134223	0.889989	-0.00816	0.990615	-0.649858	0.000259716	0.224341	0.388234
FBgn0002774	CG11680	2R	4062	957	821	1175	1065	1156	977	1053	966	1042	1107	1047	1023	0.193086	0.38794	0.14916	0.578748	-0.0430476	0.868211	0.090477	0.902371	-0.0863696	0.998294	0.0828306	0.826142	-0.0567346	0.940815	-0.0826722	0.864524	-0.0521878	0.964094	-0.0103384	0.994336	0.00463502	0.996482	0.00316083	0.998702	0.101862	0.761978	-0.104223	0.719236	-0.0525556	0.911801
FBgn0002775	CG8631	3L	1970	295	301	308	343	320	260	328	267	346	575	289	315	-0.00640858	0.98805	-0.140515	0.679496	-0.133136	0.669148	-0.0735664	0.936633	-0.0609848	0.998294	0.366617	0.40134	0.437115	0.401449	-0.0708073	0.928203	0.0364079	0.982046	0.392477	0.51765	-0.00725822	0.996482	-0.383665	0.529728	-0.088815	0.834243	0.362432	0.381801	0.0554923	0.930284
FBgn0002778	CG3297	3L	2491	4225	3979	5287	4891	9317	9761	6053	5462	8074	7482	5949	6886	0.173512	0.301818	1.08473	5.95775e-13	0.918417	2.33718e-15	0.374906	0.0874064	0.208821	0.510145	0.710309	0.000104548	-0.342032	0.170927	0.329777	0.0316963	-0.537412	0.00100867	0.313024	0.308631	0.112637	0.950078	-0.204697	0.63241	0.512417	0.00423555	0.544968	0.000321669	-0.68057	3.31344e-05
FBgn0002780	CG2050	3R	2287	3303	3579	2677	2452	2449	2225	2622	2767	2677	4218	2917	2684	-0.544872	0.000179271	-0.647814	6.35581e-05	-0.104031	0.55486	-0.399437	0.0789546	0.111827	0.980694	-0.182584	0.615441	0.413241	0.238439	0.139136	0.627059	0.225744	0.39323	0.209935	0.718926	0.0220132	0.996169	-0.192865	0.780405	-0.396525	0.0412391	0.334075	0.235408	0.219951	0.361243
FBgn0002781	CG32491	3R	2282	1212	1067	1343	1360	1543	1289	1318	1221	1514	3277	1402	1323	0.10971	0.632587	0.198217	0.416148	0.0907993	0.663689	0.0663293	0.928301	-0.0347836	0.998294	0.739651	0.0447173	0.503194	0.280254	0.0321507	0.955724	-0.0629845	0.954265	0.60607	0.169099	0.0641937	0.994439	-0.517581	0.287301	0.139013	0.6387	0.62557	0.0739994	-0.127023	0.723288
FBgn0002783	CG18740	3R	3983	1403	1321	1567	1551	1631	1471	1464	1433	1517	2358	1532	1504	0.0596664	0.800632	0.0784162	0.761403	0.0197989	0.93251	0.00550122	0.994154	-0.0492308	0.998294	0.285374	0.399966	0.203022	0.722918	-0.0144014	0.977541	-0.0432727	0.971849	0.265101	0.612177	0.0332061	0.994746	-0.235678	0.702549	0.0413678	0.904105	0.229469	0.475992	-0.0727118	0.847909
FBgn0002787	CG3416	2R	1473	2755	3019	2340	2350	2322	2311	2383	2634	2368	2864	2404	2527	-0.424139	0.00452373	-0.410819	0.0259784	0.012006	0.959698	-0.259395	0.438119	0.134908	0.931809	-0.318821	0.175969	0.0886817	0.878546	0.0894297	0.789486	0.0662396	0.942406	-0.0426088	0.954864	-0.0515483	0.994746	-0.0227197	0.977018	-0.330205	0.105821	0.100009	0.659673	0.130422	0.701535
FBgn0002789	CG4696	2R	879	189	227	171	232	193	238	225	265	199	187	166	265	-0.163409	0.697405	-0.0460566	0.924576	0.11767	0.786826	0.123791	0.893992	0.231889	0.875802	-0.244307	0.636164	-0.170841	0.868209	0.0759271	0.937186	-0.0163915	0.993685	-0.338592	0.599849	-0.152852	0.970023	0.132191	0.922876	-0.0567157	0.932108	-0.0860251	0.885715	0.179914	0.743722
FBgn0002791	CG3060	2R	2555	273	272	418	378	430	307	377	384	440	594	399	368	0.390965	0.0961804	0.302475	0.343205	-0.0829207	0.811483	0.345607	0.327474	-0.0104928	0.998294	0.65194	0.04469	0.32796	0.548353	-0.0256463	0.973409	0.0375565	0.982586	0.28007	0.622125	-0.0169149	0.996169	-0.292157	0.622348	0.354792	0.215689	0.284542	0.423062	0.0680073	0.912524
FBgn0002868	CG9470	3R	700	31113	17332	50591	38535	11752	33061	10629	4300	897	934	14552	21544	0.576185	0.231201	-0.0987844	0.908675	-0.517825	0.373297	-0.587199	0.169296	-0.597383	0.0123834	-4.38658	3.20228e-76	-1.35835	1.83692e-05	-1.03022	1.18858e-08	-0.0978283	0.954106	-2.21957	2.36703e-15	0.38524	0.514183	3.68161	3.86985e-95	-0.470501	0.215068	-5.35695	4.26847e-289	-0.56913	0.342262
FBgn0002872	CG1960	3L	4117	45	70	117	89	140	106	90	106	147	487	106	142	0.574354	0.183168	0.836871	0.0339149	0.244622	0.563668	0.444769	0.39663	-0.0112045	0.998294	1.404	0.00236202	0.627274	0.227232	0.181727	0.7926	-0.00139982	0.998611	0.791686	0.0995946	0.206244	0.910624	-0.537188	0.329557	0.799912	0.0503893	0.892031	0.0470596	-0.255128	0.656261
FBgn0002878	CG11156	X	4868	58	38	62	60	82	51	80	77	130	246	61	53	0.169423	0.782386	0.286519	0.619974	0.117086	0.844665	0.400647	0.50034	0.232217	0.917896	1.21713	0.00763428	0.770627	0.0804707	-0.0405676	NA	-0.127134	0.93993	0.693599	0.172244	-0.306451	0.76931	-0.827939	0.0246808	0.104955	0.887885	1.04087	0.00848633	0.212823	0.768214
FBgn0002887	CG10890	2L	3950	189	137	222	205	250	176	177	207	188	443	238	227	0.233611	0.537002	0.248731	0.549562	0.0177296	0.971686	0.121217	0.906166	-0.0739227	0.998294	0.550894	0.300124	0.285438	0.727352	0.11629	0.865125	0.0883376	0.955481	0.368692	0.625255	0.192415	0.896388	-0.2011	0.851834	0.359532	0.349618	0.344485	0.518758	-0.106461	0.869535
FBgn0002891	CG1925	2R	6750	323	256	172	158	129	115	151	176	189	342	202	168	-0.872379	0.000394916	-1.2504	1.11517e-06	-0.371056	0.239705	-0.732409	0.00830792	0.0279244	0.998294	-0.266103	0.620507	0.675748	0.128328	0.139717	0.846564	0.435318	0.230349	0.395724	0.563406	0.10993	0.982707	-0.274477	0.754586	-0.687514	0.017056	0.469029	0.301789	0.392367	0.328938
FBgn0002901	CG7347	3L	2816	103	122	125	135	140	112	123	118	158	302	189	116	0.0655041	0.898624	0.0475927	0.929522	-0.0177126	0.974471	0.0110842	0.992503	-0.0390648	0.998294	0.625786	0.210968	0.48656	0.403058	0.157474	0.841636	0.169146	0.883657	0.526434	0.393719	0.200908	0.920595	-0.27139	0.764342	0.271766	0.619121	0.54476	0.237001	-0.0342694	0.967281
FBgn0002905	CG6019	3R	6420	60	42	56	36	78	47	52	37	65	135	44	46	-0.213195	0.734677	0.144465	0.821366	0.34978	0.509325	-0.161602	0.891725	0.00125666	0.999666	0.479675	0.4364	0.273992	0.752251	-0.0037499	NA	-0.250962	0.776263	0.497758	NA	-0.00718453	0.996482	-0.440572	0.489249	-0.222862	0.744204	0.570975	0.272921	-0.336555	0.626287
FBgn0002906	CG6920	3R	4806	145	153	50	54	143	125	121	119	140	528	117	106	-1.44519	8.74274e-07	-0.239299	0.537448	1.20671	4.30106e-05	-0.311687	0.570388	0.74447	0.00311176	0.615119	0.284182	0.577343	0.293787	0.682825	0.00988491	-0.203494	0.819009	0.659766	0.236308	-0.0989525	0.994439	-0.594892	0.214829	-0.472425	0.196703	1.38386	0.000436218	-0.119088	0.853246
FBgn0002909	CG8601	3L	4022	664	663	925	923	1065	876	843	933	936	1075	908	948	0.333205	0.0613536	0.423372	0.0427378	0.0935851	0.683725	0.302768	0.347438	-0.00424808	0.998294	0.386528	0.147459	-0.0215028	0.979848	0.0265719	0.964127	-0.0704504	0.950988	0.0670881	0.930547	0.0279161	0.996169	-0.0505164	0.954342	0.35433	0.104312	0.0659165	0.833386	-0.0967283	0.821854
FBgn0002914	CG9045	X	2903	1537	1658	1783	1743	1633	1360	1992	1660	1812	2177	1345	1672	0.00725677	0.980045	-0.197292	0.405123	-0.205609	0.215031	0.0967924	0.892616	0.0892916	0.998294	0.123063	0.682584	0.310026	0.315128	-0.180497	0.565407	-0.00305933	0.996539	0.0208189	0.982636	-0.261711	0.633976	-0.302003	0.453805	-0.187788	0.553136	0.119358	0.604172	0.294299	0.263836
FBgn0002921	CG5670	3R	5545	152203	166450	180124	172761	211321	197526	177951	186669	187266	173562	192536	182359	0.0119841	0.962	0.246427	0.189911	0.237756	0.0287426	0.102141	0.867118	0.0924144	0.990439	-0.00291978	0.994909	-0.236596	0.395506	0.105165	0.671386	-0.133085	0.72084	-0.105594	0.836002	0.00797095	0.996169	0.101014	0.855946	0.115744	0.675079	-0.0126878	0.960767	-0.137978	0.613046
FBgn0002924	CG7831	3R	2720	50	36	65	58	135	92	47	41	94	500	67	111	0.303988	0.573698	1.08342	0.00497621	0.766386	0.0274321	-0.0282064	0.988267	-0.209856	0.96777	1.3724	0.00467082	0.500406	0.393494	0.289786	0.565233	-0.213117	0.837341	0.985306	0.0137716	0.532304	0.22641	-0.506736	0.328557	0.715679	0.126358	1.00703	0.021142	-1.06765	0.00254087
FBgn0002930	CG1857	2R	1633	105	108	106	92	92	137	98	66	88	85	93	94	-0.211543	0.634998	0.00686794	0.992419	0.209966	0.66469	-0.324897	0.617915	-0.122776	0.998294	-0.363866	0.523792	-0.276796	0.744589	-0.0386733	0.96896	-0.199078	0.844994	-0.0113176	NA	0.100712	0.994439	0.0933055	0.946911	-0.262272	0.599789	-0.170132	0.786953	-0.370407	0.532146
FBgn0002931	CG11450	2L	2225	157	73	190	202	149	121	164	115	116	120	176	263	0.532529	0.206311	0.105572	0.864636	-0.469068	0.0977461	0.123728	0.921791	-0.292791	0.705081	-0.0988963	0.902435	-0.177915	0.869413	0.130004	0.865775	0.479949	0.187478	-0.225493	0.81194	0.415676	0.435918	0.590455	0.209682	0.655002	0.145966	-0.625039	0.102157	0.0601865	0.941859
FBgn0002932	CG11988	3R	3992	934	1172	911	994	1053	1126	868	1148	837	1025	886	1033	-0.267661	0.268607	-0.0528322	0.883978	0.218082	0.263778	-0.122248	0.891725	0.108515	0.998294	-0.341973	0.287271	-0.276893	0.483225	0.0292051	0.964502	-0.179014	0.730711	-0.191296	0.766806	-0.0858195	0.994259	0.0904621	0.926792	-0.234879	0.477796	-0.0823409	0.804365	-0.0843101	0.874229
FBgn0002939	CG31783	2L	1727	2883	3248	6805	5693	14033	17617	4961	4461	8573	9334	21069	22256	0.862433	4.36492e-08	2.16288	7.58983e-30	1.31659	2.37387e-15	0.486498	0.0229355	-0.312643	0.189632	1.30594	6.3054e-17	-0.82142	1.38323e-05	1.66908	1.45863e-48	0.372915	0.147182	0.780625	1.40977e-07	1.9912	3.94753e-55	1.27179	4.85304e-33	2.6079	1.3849e-70	0.451673	0.00275424	-1.62095	3.39609e-18
FBgn0002945	CG11614	3L	5051	746	828	752	678	703	873	920	941	787	747	766	929	-0.263117	0.226739	-0.0931668	0.793032	0.166443	0.54678	0.141596	0.817163	0.377344	0.0647979	-0.204628	0.555284	-0.0986197	0.916143	0.232367	0.435609	0.0672036	0.964094	-0.337598	0.396273	-0.144858	0.917254	0.167212	0.815442	-0.00802845	0.989815	0.0507715	0.895647	0.237335	0.523173
FBgn0002948	CG1763	X	2449	258	384	311	332	287	308	294	225	314	731	295	379	-0.122857	0.773126	-0.197252	0.623586	-0.0763658	0.818977	-0.303562	0.611059	-0.19488	0.93049	0.376997	0.490514	0.466936	0.419383	0.0720439	0.929203	0.127727	0.897651	0.582192	0.300263	0.265487	0.771965	-0.325958	0.679001	-0.0422609	0.951546	0.46564	0.31849	-0.161953	0.75541
FBgn0002973	CG3779	2L	4395	15430	17931	21593	21577	21379	28086	17065	13041	15924	18844	21695	25400	0.230289	0.199756	0.444886	0.083211	0.223355	0.338339	-0.205858	0.699443	-0.402904	0.0563221	-0.126204	0.649368	-0.532155	0.0342847	0.137582	0.612502	-0.0807373	0.953405	0.0952198	0.888248	0.526171	0.024164	0.461727	0.0108484	0.364473	0.106108	-0.358952	0.00108919	-0.644134	0.0123995
FBgn0002985	CG3851	2L	2347	222	231	176	239	235	213	276	258	266	292	177	296	-0.237997	0.513127	-0.115726	0.757618	0.126135	0.747649	0.129904	0.878632	0.297581	0.642204	0.0988703	0.856364	0.191403	0.807233	0.132824	0.872958	0.0421921	0.983608	-0.0318516	0.980086	-0.145245	0.974662	-0.118413	0.92945	-0.0461962	0.949312	0.308725	0.483343	0.253452	0.516414
FBgn0002989	CG3736	2L	2878	119	123	163	168	164	163	114	154	165	297	151	147	0.288818	0.417356	0.301624	0.417171	0.0110476	0.980887	0.0490484	0.970893	-0.165663	0.992292	0.568315	0.250006	0.270192	0.736374	-0.0962356	0.913946	-0.116551	0.927968	0.429954	0.532237	0.0855341	0.994439	-0.337971	0.655874	0.165972	0.739692	0.311723	0.541656	-0.229115	0.680792
FBgn0003008	CG3029	2R	823	314	281	331	328	299	277	326	328	358	338	314	315	0.0132018	0.973198	-0.144592	0.661259	-0.157785	0.566216	0.0465815	0.966157	0.033608	0.998294	0.0392047	0.949888	0.163729	0.838534	-0.0373935	0.961278	0.0932017	0.938903	-0.00717701	0.997471	-0.0740735	0.994439	-0.0724829	0.948348	-0.030915	0.955535	0.0285203	0.95234	0.191142	0.63433
FBgn0003016	CG3479	2L	6846	1144	1271	2275	2051	1953	2027	1852	1881	1591	1565	1866	2107	0.68424	1.13279e-05	0.59549	0.00143988	-0.0870078	0.680226	0.494216	0.0213715	-0.144544	0.898384	0.190222	0.530277	-0.377309	0.138505	-0.0915472	0.839917	-0.0199596	0.989985	-0.31611	0.320136	0.0523634	0.994746	0.350154	0.228248	0.576383	0.00310697	-0.479684	0.00551939	-0.0694581	0.861663
FBgn0003041	CG8114	3L	5047	236	300	173	202	55	50	248	299	173	906	226	155	-0.596535	0.033329	-2.21173	1.59837e-15	-1.59222	3.43202e-09	-0.043988	0.971053	0.436167	0.165145	0.276442	0.683131	1.27266	0.000154493	0.0320478	0.974776	1.18134	2.22426e-06	0.389214	0.612177	-0.397945	0.431344	-0.503252	0.361563	-0.534351	0.141719	0.756532	0.115368	2.08261	5.17256e-16
FBgn0003042	CG32443	3L	2462	207	230	226	244	260	248	257	230	232	370	260	245	-0.0276506	0.949299	0.103854	0.784747	0.132451	0.680313	0.0597548	0.957938	0.0791819	0.998294	0.219424	0.67259	0.116907	0.916435	0.101937	0.8865	-0.0210838	0.99258	0.144577	0.890179	0.0176812	0.996169	-0.127985	0.919788	0.0864254	0.852908	0.239057	0.61856	-0.036401	0.957109
FBgn0003044	CG5109	2R	4384	445	337	556	484	597	541	523	433	556	1370	541	516	0.262239	0.359318	0.412557	0.120071	0.15175	0.526503	0.174064	0.815198	-0.0569025	0.998294	0.865893	0.0400964	0.450597	0.432352	0.040426	0.957521	-0.108241	0.892185	0.605691	0.247596	0.0973301	0.979419	-0.483015	0.398923	0.300562	0.349724	0.616153	0.140757	-0.214786	0.552515
FBgn0003048	CG3443	X	12119	1004	831	1043	966	1147	927	953	947	938	1070	954	844	-0.00215009	0.994001	0.0652068	0.844748	0.0689505	0.783527	-0.0281559	0.977537	-0.025228	0.998294	-0.0536713	0.899396	-0.108809	0.877771	-0.122193	0.773365	-0.192186	0.693286	-0.0221576	0.98067	-0.0976704	0.975223	-0.0874096	0.926045	-0.134217	0.700862	-0.0502403	0.878356	-0.0957267	0.816748
FBgn0003053	CG12212	X	7441	110	100	122	133	97	100	124	145	73	113	108	141	0.130949	0.778561	-0.175324	0.705526	-0.304466	0.415225	0.209867	0.804644	0.0867618	0.998294	-0.273513	0.658815	-0.0996395	0.940725	-0.00830653	0.993378	0.218128	0.805181	-0.408203	0.565324	-0.101234	0.994439	0.262806	0.776457	0.114177	0.844476	-0.366233	0.483352	0.405325	0.34726
FBgn0003062	CG9888	2R	1318	433	462	282	377	297	293	298	367	352	352	387	376	-0.53823	0.031138	-0.673126	0.00245301	-0.12131	0.732861	-0.43396	0.185811	0.0475164	0.998294	-0.480812	0.147163	0.148181	0.863201	0.18523	0.710289	0.300726	0.382241	-0.0155745	0.993484	0.135785	0.95933	0.139464	0.879181	-0.325129	0.236447	0.0398391	0.940266	0.178218	0.703735
FBgn0003067	CG17725	2R	2486	21451	49475	2557	2944	2913	15639	2222	18374	1106	1645	2742	5952	-2.41049	7.55406e-09	-0.687637	0.256039	0.639962	0.223496	-0.242795	0.630491	0.141199	0.855672	-2.73222	2.14669e-11	-0.532878	0.201908	0.246511	0.644409	-0.145908	0.837524	-0.408542	0.393719	-0.139969	0.90911	1.14322	7.84439e-05	-1.45576	0.00199712	-0.97735	1.15787e-06	0.0250289	0.976492
FBgn0003068	CG2647	X	4527	1872	699	279	311	342	623	595	1078	802	804	252	610	-1.34653	0.00420885	-0.810969	0.17941	0.658277	0.042951	-0.21211	0.821519	0.984918	6.68135e-06	-0.673967	0.144801	0.469876	0.370317	0.173038	0.792675	-0.0514654	0.976538	-0.123685	0.906652	-0.26923	0.792559	-0.500008	0.38099	-0.720964	0.213951	1.27389	3.91868e-10	0.452294	0.526387
FBgn0003071	CG4001	2R	3508	6376	6660	5201	5036	6102	6094	6028	5323	6147	6167	5728	5794	-0.473761	0.000232834	-0.196104	0.332733	0.278033	0.0227418	-0.261285	0.369385	0.182398	0.678978	-0.257525	0.241363	-0.057585	0.918266	0.184214	0.243108	-0.0937614	0.867495	0.0171646	0.983417	-0.00832993	0.996169	-0.0379352	0.954428	-0.283827	0.134744	0.212752	0.182515	-0.0804161	0.828357
FBgn0003074	CG8251	2R	2460	26516	34488	23442	22674	28464	33220	23715	33336	26634	25079	25567	26101	-0.519025	0.00546839	-0.082267	0.812854	0.44078	0.00385601	-0.149161	0.855733	0.292703	0.476768	-0.397419	0.135807	-0.303248	0.331615	0.178999	0.21697	-0.248816	0.414856	-0.21281	0.700105	-0.146499	0.936017	0.0490417	0.943219	-0.337469	0.188106	0.115903	0.568411	-0.0856348	0.879047
FBgn0003076	CG5165	3L	1843	32123	29177	46389	46098	39106	34743	42753	42905	49037	45403	41065	46072	0.451531	0.000282233	0.157936	0.440099	-0.293497	0.00600168	0.372305	0.071887	-0.0549527	0.998294	0.424889	0.0372657	0.267944	0.318815	-0.0598513	0.8865	0.206484	0.440662	0.0406943	0.951826	-0.00651254	0.996482	-0.0585391	0.937592	0.38081	0.0377433	-0.0146196	0.954813	0.229979	0.263527
FBgn0003079	CG2845	X	4247	915	949	929	964	874	813	992	999	852	1183	942	903	-0.108787	0.641211	-0.242657	0.277074	-0.134366	0.491918	0.010625	0.991485	0.111276	0.991776	-0.0637086	0.885817	0.163985	0.791466	-0.0128091	0.980837	0.101922	0.887003	-0.0693063	0.935187	-0.126773	0.922167	-0.0646517	0.948348	-0.123798	0.686926	0.0420766	0.915191	0.249835	0.322945
FBgn0003091	CG6622	2R	4711	50	37	30	36	92	104	56	38	56	63	95	72	-0.394972	0.480128	0.904168	0.022719	1.30305	0.000129595	0.0160504	0.991676	0.222161	0.930009	0.164574	0.832016	-0.452343	0.478813	0.681481	NA	-0.160013	0.892185	0.11602	NA	0.44642	0.413786	0.265722	0.77479	0.653982	0.152522	0.439495	0.438327	-0.821663	0.0381117
FBgn0003093	CG1954	3R	5529	3688	2948	4089	3695	4391	4438	4327	3377	4178	4368	4274	4341	0.0942809	0.718756	0.298155	0.185425	0.207812	0.171194	0.115542	0.88469	0.0306302	0.998294	0.171958	0.549388	-0.116725	0.771398	0.158791	0.47145	-0.0502393	0.958056	0.0456324	0.954864	0.114669	0.96308	0.0646727	0.917	0.253002	0.316009	0.0828219	0.713175	-0.167963	0.642311
FBgn0003116	CG3461	X	1638	477	450	396	451	273	297	476	444	393	386	390	340	-0.2517	0.308612	-0.763929	0.000629672	-0.510396	0.0187286	-0.0832958	0.920243	0.141274	0.980694	-0.395139	0.248349	0.305178	0.576144	-0.159063	0.742944	0.277443	0.522854	-0.289923	0.582134	-0.307807	0.486338	-0.0300735	0.981893	-0.430491	0.0944483	-0.150296	0.714614	0.658388	0.00436524
FBgn0003118	CG17077	3R	4074	888	1260	1050	1086	887	971	1159	1076	782	886	730	780	-0.13628	0.681427	-0.294543	0.354209	-0.163848	0.437967	-0.0245886	0.983784	0.104395	0.993563	-0.503448	0.12389	-0.210642	0.650486	-0.434842	0.00379417	-0.281825	0.351154	-0.479239	0.0676499	-0.53351	0.00464424	-0.0748736	0.933021	-0.57754	0.0330847	-0.388161	0.054771	0.269596	0.330737
FBgn0003130	CG8246	2R	2458	40	60	42	54	24	33	64	68	74	42	41	61	-0.14947	0.822517	-0.688348	0.188881	-0.520668	0.302415	0.194735	0.854469	0.252848	0.872498	0.0250388	0.982271	0.348864	0.622381	0.0502427	NA	0.362671	0.520056	-0.12808	NA	-0.226449	0.907019	-0.0522863	0.970423	-0.0659165	0.942095	0.12382	0.8672	0.898674	0.0352116
FBgn0003134	CG6593	3R	3210	2951	2889	2884	2785	3323	3129	3080	3010	3150	3457	3054	3312	-0.173387	0.29128	0.0368558	0.887597	0.211732	0.105656	-0.0210429	0.980573	0.143117	0.840273	-0.00894644	0.983392	-0.0399201	0.943091	0.178298	0.372295	-0.0339847	0.976538	0.0140129	0.985901	0.0297408	0.994746	0.00404395	0.99758	0.00998788	0.982214	0.16546	0.331939	-0.0592525	0.869593
FBgn0003137	CG33103	3R	9544	375	271	229	160	145	302	144	190	93	126	143	330	-0.777418	0.00801668	-0.523878	0.243174	0.201426	0.705997	-0.801341	0.00581807	-0.104623	0.998294	-1.44472	2.01075e-05	-0.62236	0.227516	0.157302	0.848317	0.0108814	0.995323	-0.480685	0.442349	0.25696	0.862266	0.56418	0.289083	-0.45424	0.367629	-0.656148	0.121314	-0.320254	0.621353
FBgn0003139	CG12217	X	1675	1052	1183	1102	1128	1008	931	1199	1094	1054	1183	1095	1066	-0.133789	0.56678	-0.301639	0.170669	-0.169455	0.33584	-0.0429136	0.964331	0.0817763	0.998294	-0.17702	0.569259	0.118838	0.833074	-0.0205889	0.970192	0.127503	0.823633	-0.127095	0.821581	-0.104504	0.962529	0.00832231	0.993604	-0.156394	0.605115	-0.045214	0.88254	0.252125	0.318235
FBgn0003141	CG16784	2L	1073	561	599	719	743	659	659	692	645	722	753	639	675	0.192174	0.399587	0.0759728	0.803498	-0.11609	0.60505	0.107804	0.88469	-0.0674667	0.998294	0.149113	0.678315	0.0770632	0.921817	-0.118017	0.779286	-0.0202336	0.990136	0.036545	0.966749	-0.0496633	0.994746	-0.0964435	0.913042	0.0619527	0.86908	-0.0345273	0.924195	0.0388967	0.941767
FBgn0003149	CG5939	3L	3661	477	425	467	521	461	495	482	535	472	462	313	578	-0.00174325	0.99547	-0.0177305	0.963577	-0.0155426	0.966539	0.0800761	0.922493	0.0781184	0.998294	-0.120829	0.778859	-0.0925416	0.918199	-0.0871108	0.928203	-0.0859545	0.960145	-0.191329	0.766806	-0.154805	0.970023	-0.0105818	0.995658	-0.115056	0.84012	-0.116493	0.772508	0.101791	0.831286
FBgn0003159	CG2841	X	5069	5651	6729	6713	6705	7076	6481	6704	6253	6452	6235	5807	6099	-0.0188135	0.949299	0.0221815	0.942977	0.0421967	0.804273	-0.0175046	0.987606	0.00112928	0.999425	-0.14173	0.639997	-0.157941	0.646911	-0.142481	0.460872	-0.191054	0.449023	-0.120845	0.795195	-0.141312	0.853091	-0.0348211	0.961648	-0.164764	0.574999	-0.123878	0.535149	-0.0415558	0.918338
FBgn0003165	CG9755	3R	10223	2867	3178	3159	2834	2879	3250	2959	2660	2474	3422	2999	2724	-0.143478	0.502015	-0.0794028	0.790573	0.0635517	0.797962	-0.173155	0.718674	-0.0370498	0.998294	-0.21844	0.468876	-0.128042	0.842028	-0.0396081	0.944089	-0.106423	0.89097	-0.0362406	0.966749	-0.00357753	0.996482	0.0198381	0.985619	-0.186077	0.489327	-0.0776193	0.809423	-0.102654	0.804373
FBgn0003169	CG7904	3R	4013	2666	2848	3333	3289	3520	3850	3311	2848	3316	3658	2857	3994	0.126575	0.509694	0.305437	0.150017	0.18215	0.293395	0.068042	0.924495	-0.0478567	0.998294	0.145081	0.570701	-0.148606	0.721793	0.0605569	0.929807	-0.106422	0.92064	0.0720632	0.90758	0.100818	0.979419	0.0268336	0.981604	0.185315	0.605115	0.022882	0.921139	-0.229167	0.4347
FBgn0003175	CG4444	2R	8360	3038	2585	2965	2981	3521	2660	3269	3623	3327	2915	3329	2636	-0.0509869	0.843189	0.0249253	0.94244	0.0768434	0.747791	0.192064	0.678969	0.23999	0.368505	-0.0263732	0.955391	-0.0448578	0.959201	0.0251123	0.96896	-0.053098	0.973556	-0.216712	0.638627	-0.205545	0.805816	-0.0107611	0.993147	-0.0255829	0.958995	0.0251612	0.939535	0.174613	0.626925
FBgn0003189	CG18572	X	7057	114	88	164	153	81	65	90	85	58	220	91	109	0.461616	0.181287	-0.502222	0.228239	-0.968858	0.000588583	-0.208992	0.816807	-0.537692	0.0604989	0.141457	0.862575	0.330187	0.656606	-0.447897	0.142105	0.285507	0.677736	0.230516	0.818345	0.109402	0.989327	-0.136812	0.915053	-0.108226	0.859846	-0.148735	0.835734	0.236914	0.707697
FBgn0003204	CG1799	X	2810	3256	2988	2882	2764	2628	2164	3386	3121	3223	3210	2526	2753	-0.272807	0.0729836	-0.476287	0.00837377	-0.206363	0.196524	-0.0216922	0.980573	0.234457	0.337953	-0.13493	0.618875	0.328174	0.227165	-0.0694737	0.865886	0.1138	0.855625	-0.108368	0.832069	-0.303221	0.230168	-0.21303	0.554934	-0.343557	0.0758041	0.135855	0.51096	0.445939	0.0196612
FBgn0003205	CG9375	3R	1958	1848	1705	1729	1752	1884	1746	1720	1760	1678	2056	1768	1732	-0.159244	0.392161	-0.0730715	0.774504	0.0869871	0.627421	-0.103143	0.868468	0.0470761	0.998294	-0.113235	0.710212	-0.0357906	0.960195	0.028828	0.957702	-0.0639721	0.944592	-0.00446065	0.997616	-0.0211281	0.996169	-0.0289829	0.973443	-0.130415	0.631204	0.0446419	0.878152	-0.0368134	0.932423
FBgn0003206	CG1167	3L	1620	575	569	819	774	740	785	682	697	666	754	742	739	0.332032	0.0779406	0.29932	0.208351	-0.0306355	0.915222	0.167583	0.760849	-0.136669	0.970476	0.115097	0.757698	-0.162174	0.775575	-0.0743358	0.889204	-0.0547261	0.964094	-0.0552983	0.947833	0.0636166	0.994439	0.105495	0.895656	0.246988	0.342051	-0.204705	0.454432	-0.118778	0.768214
FBgn0003209	CG12437	2L	4275	653	696	596	642	530	465	576	538	482	699	448	602	-0.248819	0.253017	-0.525989	0.0116394	-0.277865	0.158448	-0.3215	0.312406	-0.0863187	0.998294	-0.352421	0.321882	0.136021	0.877771	-0.177374	0.702807	0.0503287	0.976538	-0.0224129	0.985901	-0.0959493	0.983368	-0.079436	0.946911	-0.443214	0.113411	-0.114465	0.788246	0.175664	0.624726
FBgn0003210	CG11427	X	4813	1456	1328	1324	1435	1575	1427	1413	1344	1460	1855	1574	1487	-0.142294	0.505271	0.00220713	0.995012	0.14593	0.415622	-0.0885754	0.892983	0.0453561	0.998294	0.0570662	0.881133	0.0577117	0.93923	0.158729	0.565407	0.0111349	0.99366	0.145155	0.786251	0.108703	0.951315	-0.0467189	0.956778	0.0227386	0.956802	0.197998	0.43258	-0.0961507	0.789572
FBgn0003218	CG11111	X	7435	5233	4907	8233	8119	11609	10412	8523	6840	10024	9220	7417	9251	0.545529	6.18182e-06	0.988709	1.64047e-12	0.450384	9.44118e-06	0.464977	0.0435908	-0.0343194	0.998294	0.711733	0.000103771	-0.246981	0.404721	0.0450942	0.939557	-0.374926	0.0813655	0.208701	0.647442	0.0740439	0.994439	-0.138682	0.828342	0.576277	0.00322292	0.183108	0.370766	-0.47333	0.0192201
FBgn0003231	CG10360	2L	2395	10267	13088	13235	12456	17171	14705	12521	11457	13825	13438	12041	13682	0.00128027	0.996098	0.324963	0.168644	0.331775	0.00564038	-0.0423726	0.966734	-0.0441085	0.998294	0.0359191	0.934562	-0.278989	0.26334	0.0227767	0.96522	-0.297948	0.160155	0.081778	0.883391	0.063605	0.994439	-0.0276722	0.970473	0.0215417	0.965476	0.0377254	0.876373	-0.37266	0.0432793
FBgn0003256	CG12559	2R	6472	4274	3973	4332	4171	3784	3614	4354	3085	3806	4266	3833	4198	-0.0877963	0.651016	-0.255748	0.166172	-0.169112	0.213896	-0.202825	0.724383	-0.116403	0.998294	-0.21117	0.33999	0.0461643	0.938091	-0.0561104	0.902814	0.0936014	0.879404	0.0147102	0.991794	0.0672948	0.994439	0.0479349	0.943219	-0.14695	0.569855	-0.123882	0.473858	0.0255946	0.967281
FBgn0003257	CG3593	3R	2039	690	1141	1529	1370	581	795	861	1109	524	613	1251	916	0.481688	0.0991286	-0.461562	0.211697	-0.976449	1.12558e-06	0.0155927	0.991485	-0.41303	0.095801	-0.764663	0.0277338	-0.293968	0.602687	-0.330075	0.217823	0.482406	0.12616	-0.77251	0.00401411	0.0831506	0.994439	0.80121	0.00198677	0.110585	0.84012	-1.32282	5.00312e-16	0.476665	0.150584
FBgn0003261	CG10279	3R	4362	14631	13842	15254	15335	14851	15722	14798	12429	13551	14712	14792	16393	-0.029801	0.887994	-0.000122739	0.999436	0.0301857	0.887107	-0.135893	0.808011	-0.104934	0.992292	-0.191771	0.34592	-0.182131	0.537656	0.0476317	0.919722	0.00786444	0.995323	-0.044543	0.947511	0.147673	0.885861	0.188824	0.5329	0.0168745	0.964955	-0.162194	0.205204	-0.142027	0.684212
FBgn0003268	CG1569	3R	6479	30	23	37	33	58	66	28	30	45	495	31	53	0.190622	0.780712	0.887443	0.0534374	0.670844	0.114003	0.0239232	NA	-0.0825858	0.998294	1.27835	0.00978725	0.548738	0.25985	0.1136	NA	-0.290357	0.695722	0.804509	0.0492782	0.218525	0.909313	-0.515974	0.195053	0.373086	0.584682	0.93528	0.0280961	-0.794087	0.0729162
FBgn0003274	CG4918	2R	604	21801	20530	21537	22201	20207	19249	21728	16909	21994	20443	21034	22330	-0.0849759	0.637663	-0.20243	0.273868	-0.118175	0.383321	-0.194007	0.690006	-0.111004	0.998294	-0.170852	0.497299	0.0318798	0.960452	0.00979886	0.980272	0.111687	0.804863	0.0359271	0.966749	0.119391	0.95742	0.0783352	0.904356	-0.076675	0.781242	-0.0861538	0.711591	-0.00955913	0.987216
FBgn0003275	CG1163	3R	541	597	456	484	469	440	465	524	437	543	497	458	496	-0.261534	0.328261	-0.302447	0.305766	-0.0417458	0.894438	-0.181412	0.799581	0.0522078	0.998294	-0.177002	0.681423	0.107362	0.905888	0.0211871	0.975663	0.0488124	0.973858	0.0149866	0.992722	-0.0349102	0.995535	-0.058942	0.955765	-0.237345	0.492932	0.0728542	0.867915	0.0977297	0.844153
FBgn0003277	CG1554	X	6736	3233	3217	3030	2867	2664	2640	3452	2901	2885	3567	2558	2899	-0.258133	0.0843638	-0.377425	0.0283968	-0.120709	0.462789	-0.096736	0.887517	0.140518	0.948372	-0.183295	0.467244	0.188187	0.603133	-0.0826601	0.848317	0.0205841	0.987361	-0.0764539	0.911939	-0.221116	0.690563	-0.164379	0.745482	-0.34282	0.0855155	0.0721659	0.773139	0.267216	0.285816
FBgn0003278	CG4033	2L	3564	196	119	184	151	178	142	148	156	194	197	201	177	-0.0368656	0.949299	-0.0744316	0.892586	-0.0368308	0.939725	-0.0952972	0.932473	-0.0611701	0.998294	0.102568	0.882591	0.158444	0.878546	0.145817	0.836592	0.172564	0.848756	0.196159	0.826209	0.217556	0.862266	0.00568084	0.998527	0.131917	0.821763	0.140877	0.796367	-0.0428844	0.95624
FBgn0003279	CG5502	3R	1400	41285	47019	44876	48209	42159	40363	42187	44622	41801	41065	43656	43913	-0.0574963	0.816738	-0.198732	0.357173	-0.142656	0.302516	-0.0990342	0.883699	-0.0445846	0.998294	-0.265296	0.257379	-0.0639504	0.901331	-0.0621139	0.865603	0.0644575	0.925775	-0.157569	0.676765	-0.0177114	0.996169	0.127481	0.75216	-0.122828	0.664987	-0.209584	0.189192	0.091949	0.775037
FBgn0003301	CG9533	X	9269	482	431	797	770	942	844	718	614	670	652	754	828	0.622058	0.000390029	0.829296	8.99076e-06	0.21042	0.238496	0.405787	0.164974	-0.156855	0.937909	0.322701	0.334629	-0.450751	0.117919	0.0328256	0.959884	-0.17166	0.707924	-0.0955058	0.906652	0.188743	0.824182	0.271464	0.569367	0.645407	0.00169268	-0.272437	0.313292	-0.379094	0.108983
FBgn0003302	CG4336	X	1420	81	73	106	103	109	80	109	72	113	126	93	84	0.267619	0.543244	0.161217	0.757749	-0.105681	0.832499	0.100459	0.93233	-0.0893826	0.998294	0.336607	0.560387	0.165966	0.882734	-0.141618	0.860533	-0.0698816	0.973819	0.184906	0.866208	-0.038257	0.996169	-0.220082	0.828342	0.0741376	0.912524	0.106254	0.86836	-0.0302649	0.975039
FBgn0003308	CG7642	3R	4337	6179	7134	9326	9036	14217	13784	7637	14594	14198	9289	14493	11907	0.319813	0.0538878	0.937694	6.05978e-09	0.629069	1.3497e-10	0.499652	0.219363	0.132507	0.998294	0.582715	0.0718245	-0.264251	0.623055	0.496929	0.000666595	-0.0915101	0.912996	-0.00551474	0.99798	0.148237	0.973395	0.167783	0.849183	0.829321	1.73534e-05	0.287562	0.405224	-0.266061	0.613742
FBgn0003310	CG4385	2L	5206	484	463	498	487	378	417	448	475	384	698	359	445	-0.0741192	0.804186	-0.337842	0.195514	-0.264716	0.250209	-0.10563	0.891725	-0.0351644	0.998294	-0.00940747	0.991033	0.260295	0.720993	-0.227214	0.514773	-0.00378949	0.996044	0.0847126	0.94024	-0.192407	0.8652	-0.244667	0.776742	-0.327647	0.273487	0.0565159	0.920894	0.218028	0.566955
FBgn0003317	CG1891	2R	2716	729	809	935	936	882	931	993	806	920	1136	833	949	0.142881	0.548865	0.127958	0.651694	-0.0139034	0.962354	0.123492	0.868468	-0.00475994	0.998294	0.211765	0.518413	0.0888871	0.907554	-0.0430406	0.945112	-0.0394636	0.976538	0.077263	0.927587	-0.0379378	0.994746	-0.126821	0.862873	0.0923062	0.802505	0.0766013	0.812535	0.00659632	0.990671
FBgn0003321	CG1664	X	3280	2059	1689	2555	2537	2245	2190	2458	1848	2136	2335	2106	2458	0.299994	0.101153	0.134148	0.607993	-0.166822	0.258925	0.101052	0.903474	-0.160577	0.953566	0.0651445	0.857201	-0.0613891	0.917504	-0.124437	0.710289	0.0209389	0.988503	-0.041765	0.963071	0.0451799	0.994746	0.0795939	0.917	0.163108	0.607048	-0.23189	0.155268	-0.0217047	0.971402
FBgn0003328	CG8095	2R	4643	8247	6875	3824	4059	3976	3170	4063	5000	3865	3318	2615	2847	-1.04293	8.48255e-14	-1.14841	4.05925e-11	-0.114222	0.562184	-0.723256	0.000539114	0.219372	0.678978	-1.17806	3.61367e-09	-0.0516663	0.947176	-0.473711	8.27529e-05	-0.361798	0.0874523	-0.382917	0.312334	-0.664977	0.000599976	-0.30568	0.4179	-1.51875	9.64141e-22	-0.16735	0.533935	0.347703	0.191876
FBgn0003330	CG5595	3R	1542	236	220	246	271	254	255	227	247	272	312	252	263	0.0445535	0.914905	0.0509948	0.899534	0.00678542	0.98619	-0.0220692	0.987326	-0.0563481	0.998294	0.147825	0.763358	0.0959349	0.925967	0.0138729	0.982791	-0.00111918	0.998611	0.158325	0.858262	0.0716391	0.994439	-0.094682	0.935341	0.0573237	0.905318	0.106863	0.823743	-0.074631	0.899841
FBgn0003334	CG9495	3R	4069	1090	1229	1066	1045	1046	1090	1091	1221	1018	1506	1147	1049	-0.261944	0.183162	-0.214896	0.393883	0.0465541	0.851744	-0.0781633	0.921791	0.161446	0.887538	-0.0697199	0.881128	0.132211	0.866385	0.073064	0.886647	0.0189459	0.991212	0.0117822	0.994881	-0.0933	0.978322	-0.11087	0.910249	-0.184562	0.537434	0.180269	0.591787	0.127603	0.743722
FBgn0003345	CG8544	X	6005	1656	1459	1323	1462	2286	1944	1478	1286	1743	1563	1493	1464	-0.285702	0.12178	0.323234	0.113234	0.613135	5.36549e-06	-0.230727	0.550586	0.035249	0.998294	-0.0882664	0.813009	-0.382948	0.198079	0.100328	0.801154	-0.4859	0.00276421	0.14582	0.810847	0.0598298	0.994439	-0.096052	0.905139	-0.180936	0.493424	0.189988	0.500792	-0.562442	0.0026789
FBgn0003346	CG9999	2L	2401	160	190	138	175	181	169	154	195	183	610	200	157	-0.266964	0.485947	-0.099078	0.817091	0.172197	0.65103	-0.0678881	0.957193	0.138696	0.998294	0.659222	0.22703	0.564243	0.313908	0.148066	0.843284	0.00942932	0.995323	0.56189	0.374416	0.000654661	0.999362	-0.475649	0.433756	-0.0768249	0.89064	0.762285	0.1022	0.0171865	0.98243
FBgn0003360	CG16944	X	1853	92373	103845	79220	82595	84914	85990	85773	87252	88373	90043	83265	86907	-0.40345	0.00599754	-0.295841	0.131804	0.107481	0.483197	-0.243928	0.439087	0.1387	0.816482	-0.311362	0.138508	-0.0127872	0.982546	0.0910759	0.726467	-0.0233781	0.982586	-0.0537342	0.920283	-0.0517073	0.994439	-0.0117674	0.98768	-0.309617	0.125036	0.0904766	0.589068	0.0369256	0.925203
FBgn0003371	CG2621	X	5004	11871	11312	15253	14260	17371	20362	14366	13457	14369	14101	17923	16626	0.2104	0.153939	0.58135	0.00248397	0.377055	0.0204667	0.167635	0.665923	-0.0307955	0.998294	0.109276	0.666928	-0.44573	0.0501742	0.236051	0.119738	-0.132349	0.844994	-0.0620802	0.914902	0.258822	0.350849	0.313181	0.164389	0.448185	0.00650294	-0.0964519	0.630802	-0.401175	0.0734717
FBgn0003380	CG12348	X	12181	248	190	222	201	75	82	190	156	112	145	185	203	-0.168136	0.656242	-1.42669	7.47137e-07	-1.25991	6.57711e-07	-0.335327	0.504973	-0.17278	0.978841	-0.783378	0.0566115	0.387003	0.565712	-0.0792373	0.926901	0.934247	0.000111007	-0.378309	0.578226	0.103517	0.984115	0.438169	0.453805	-0.259569	0.534185	-0.620425	0.104065	0.996522	0.0008639
FBgn0003386	CG2822	2L	4557	59	69	68	70	35	64	63	65	68	64	70	84	-0.0221318	0.972775	-0.365644	0.521761	-0.334173	0.526891	-0.056037	0.96999	-0.0309301	0.998294	-0.0938362	0.910384	0.143261	0.908103	0.106384	0.914525	0.30444	0.664994	-0.0299359	NA	0.147214	0.975223	0.136681	0.922876	0.124123	0.851238	-0.0710973	0.921139	0.274693	0.717259
FBgn0003391	CG3722	2R	6400	2026	2112	1874	1956	2134	1817	1860	1917	1956	2198	1945	1659	-0.240164	0.148907	-0.170624	0.449882	0.0695119	0.733956	-0.197479	0.60872	0.0291032	0.998294	-0.175516	0.496131	-0.00253193	0.996581	-0.0581819	0.92364	-0.130826	0.844994	0.0312619	0.966741	-0.0873499	0.978393	-0.130473	0.834127	-0.299972	0.203981	0.0630766	0.797223	-0.0386719	0.93111
FBgn0003392	CG18102	X	4768	3064	2938	3312	3031	3434	3163	3345	3029	3460	3584	3238	3068	-0.0530847	0.817484	0.0292234	0.911949	0.0832683	0.6387	0.00297774	0.997197	0.0529395	0.998294	0.0440936	0.890827	0.0194425	0.974676	0.0138154	0.977541	-0.0756067	0.918249	0.0411196	0.949982	-0.0419642	0.994746	-0.0959785	0.857715	-0.0410185	0.89734	0.0989797	0.650173	-0.026596	0.953789
FBgn0003396	CG7734	2R	9886	3066	3677	3346	3271	3968	4240	3470	4509	3331	3074	3401	3467	-0.157647	0.485035	0.172574	0.51742	0.335018	0.0160374	0.137791	0.855228	0.271875	0.486042	-0.242218	0.412931	-0.396531	0.114497	0.0725991	0.841052	-0.254001	0.308959	-0.368793	0.34468	-0.213355	0.791115	0.14082	0.795005	-0.0853092	0.806297	-0.0884062	0.743313	-0.0187485	0.975039
FBgn0003410	CG9949	3L	3191	1376	1203	1178	1156	1335	1297	1178	1287	1399	1760	1235	1237	-0.269168	0.140709	-0.0727956	0.792963	0.198118	0.219678	-0.132177	0.832193	0.116518	0.981193	0.0960131	0.78093	0.166682	0.720335	0.0979815	0.793221	-0.099193	0.879404	0.226922	0.611225	-0.0248921	0.996169	-0.26142	0.517992	-0.167172	0.551782	0.362268	0.0741843	-0.0693407	0.868049
FBgn0003415	CG9936	3L	11414	1758	1728	1611	1605	2270	2141	1803	2021	1712	2501	1915	1617	-0.244686	0.12832	0.227581	0.250867	0.47547	5.37877e-05	0.0466482	0.957938	0.269302	0.306315	0.0714212	0.86286	-0.134748	0.833074	0.142983	0.686633	-0.302274	0.233107	0.0238554	0.982636	-0.127113	0.945507	-0.156804	0.837671	-0.0906	0.788958	0.305776	0.247892	-0.175221	0.565699
FBgn0003416	CG4200	X	5678	1611	1415	1473	1314	1907	1809	1519	1295	1748	1965	1545	1605	-0.244331	0.210474	0.185561	0.415427	0.433497	0.00154737	-0.169039	0.752011	0.0565438	0.998294	0.102838	0.740838	-0.0734134	0.901935	0.183185	0.458562	-0.236352	0.329699	0.272968	0.464145	0.117694	0.946818	-0.164819	0.707428	-0.053034	0.874536	0.346735	0.0637533	-0.362607	0.0933497
FBgn0003435	CG9218	2R	15344	275	312	384	262	296	240	389	305	303	316	275	290	0.0022977	0.99547	-0.226689	0.49142	-0.222506	0.52259	0.129952	0.884562	0.106835	0.998294	-0.0973062	0.854445	0.108568	0.916435	-0.126585	0.864524	0.0507138	0.976182	-0.214811	0.766806	-0.263956	0.720273	-0.0589955	0.961648	-0.157933	0.694865	-0.0915833	0.86979	0.360312	0.299356
FBgn0003444	CG11561	2L	4008	476	410	556	550	497	439	569	535	566	843	555	488	0.178857	0.492636	-0.0262564	0.942838	-0.205832	0.337084	0.206762	0.692341	0.0422987	0.998294	0.42329	0.247384	0.418224	0.332233	-0.0533018	0.937186	0.121565	0.883657	0.201546	0.766806	-0.0969637	0.978322	-0.287545	0.650228	0.115315	0.766886	0.256846	0.474528	0.24641	0.420103
FBgn0003447	CG32858	X	3358	44	36	79	62	176	150	59	50	60	582	52	89	0.546153	0.233323	1.68289	8.60408e-08	1.08946	0.00011778	0.219228	0.828512	-0.162752	0.998294	1.24917	0.0127479	0.125109	0.879921	0.0108203	0.992121	-0.768246	0.00832259	0.73349	0.107242	0.180508	0.95742	-0.480582	0.304667	0.526318	0.335742	0.783155	0.0905376	-1.32136	5.88091e-06
FBgn0003449	CG4528	X	835	515	511	615	649	633	602	575	591	617	706	597	581	0.160843	0.509053	0.155576	0.560827	-0.00462082	0.986881	0.0907101	0.905025	-0.055606	0.998294	0.165318	0.647752	0.0191711	0.982557	-0.0701087	0.913946	-0.0758979	0.944592	0.0692533	0.931618	-0.014641	0.996169	-0.0934955	0.922053	0.0812272	0.822475	0.0124103	0.972616	-0.0577171	0.904594
FBgn0003450	CG7996	3R	1434	67	80	72	56	49	34	96	92	78	65	59	68	-0.27784	0.580642	-0.773474	0.0751893	-0.471124	0.315722	0.19215	0.84071	0.342305	0.590315	-0.150559	0.841713	0.335286	0.65768	0.00629652	0.996112	0.323448	0.615895	-0.29009	NA	-0.389457	0.5238	-0.057172	0.970423	-0.267116	0.645403	0.0725547	0.921139	0.955718	0.00997791
FBgn0003459	CG3836	3L	4233	371	372	283	292	354	335	378	335	384	597	312	346	-0.478899	0.0289872	-0.205053	0.475685	0.275446	0.246354	-0.124676	0.871059	0.291518	0.493952	0.177778	0.705556	0.334184	0.546006	0.180612	0.681547	-0.0710468	0.957933	0.277129	0.677606	-0.122833	0.970023	-0.377283	0.515602	-0.27164	0.38162	0.602092	0.0706874	0.0658375	0.904594
FBgn0003462	CG11793	3L	777	13432	11087	11986	12392	11558	11913	12319	9410	12303	11336	11421	12083	-0.13717	0.51265	-0.1602	0.515381	-0.023475	0.911227	-0.226399	0.634522	-0.0987599	0.998294	-0.221333	0.419462	-0.0581186	0.929937	-0.0285404	0.951126	-0.015971	0.990652	0.0235666	0.98067	0.0722861	0.994439	0.0412786	0.955557	-0.166867	0.540784	-0.0864654	0.72143	-0.0876905	0.847909
FBgn0003463	CG9224	X	5816	706	754	852	858	1394	1360	664	799	988	836	1099	976	0.0903966	0.726702	0.783715	6.51698e-06	0.699857	4.61246e-08	-0.0695623	0.933803	-0.145055	0.978811	0.129944	0.749282	-0.583948	0.026156	0.271959	0.204904	-0.383174	0.0617284	0.188619	0.779325	0.401977	0.175515	0.199015	0.766028	0.374077	0.10649	0.046144	0.911559	-0.838706	1.20072e-05
FBgn0003464	CG1391	X	5592	1878	2147	1565	1774	1923	1622	1624	1630	1534	2048	1425	1613	-0.390744	0.0337035	-0.282964	0.206219	0.109122	0.60734	-0.353826	0.19097	0.0130748	0.998294	-0.340944	0.227423	-0.0587225	0.940815	-0.102779	0.824493	-0.214049	0.535778	0.0267778	0.977575	-0.117704	0.935704	-0.152702	0.816468	-0.497412	0.0166773	0.0409159	0.908278	-0.0947057	0.80037
FBgn0003475	CG10076	2L	5598	688	962	967	977	1376	1345	781	1019	799	1119	995	1100	0.0941062	0.792707	0.580115	0.0204733	0.502531	0.000150412	0.0337869	0.978981	-0.0470522	0.998294	0.0171607	0.979079	-0.519958	0.0594849	0.118851	0.753695	-0.358758	0.0766657	-0.0173252	0.99129	0.154808	0.924782	0.162131	0.828342	0.210303	0.584682	-0.0723435	0.853962	-0.533719	0.0271798
FBgn0003479	CG7948	3R	1342	134	124	143	153	201	162	209	153	175	260	203	179	0.0586382	0.903208	0.352145	0.322448	0.292643	0.36823	0.311647	0.586019	0.229203	0.890819	0.451726	0.348416	0.126928	0.914346	0.292281	0.452414	0.0461794	0.978764	0.109424	0.927587	0.0354893	0.996169	-0.0804434	0.952142	0.40722	0.262298	0.389453	0.391963	0.0171857	0.98251
FBgn0003502	CG8049	2L	4992	727	791	820	975	443	487	777	810	468	1135	912	613	0.1029	0.721785	-0.774189	0.000195304	-0.875592	6.89354e-07	-0.0173868	0.988267	-0.106753	0.998294	-0.109489	0.865335	0.459166	0.421852	-0.163842	0.778771	0.537914	0.0584825	-0.079043	0.949731	-0.068765	0.994746	0.00609058	0.998527	-0.0983093	0.835893	-0.184613	0.745198	0.741996	0.000249465
FBgn0003507	CG3992	3R	4459	495	236	577	529	241	227	542	276	302	223	481	336	0.40874	0.295533	-0.649298	0.0944925	-1.15697	1.58048e-11	0.0508942	0.974537	-0.238175	0.887855	-0.494247	0.342528	0.0736272	0.948936	-0.322283	0.327123	0.603248	0.0255321	-0.477664	0.453836	-0.0177854	0.996169	0.455144	0.423754	0.0441974	0.957405	-0.938347	0.00136807	0.686921	0.0652982
FBgn0003510	CG17957	3R	3300	175	188	200	207	227	178	196	186	202	258	196	190	0.0282724	0.950154	0.04397	0.923176	0.0164833	0.972615	-0.00849538	0.994154	-0.0299379	0.998294	0.126251	0.824753	0.0793741	0.943091	-0.0418854	0.961278	-0.0646754	0.972172	0.124068	0.902992	-0.0127122	0.996169	-0.136951	0.905139	-0.0236312	0.969477	0.101007	0.852019	-0.0529798	0.941163
FBgn0003512	CG17958	3R	1546	205	281	365	419	396	359	343	293	351	446	298	309	0.510265	0.0695172	0.489474	0.101492	-0.0254921	0.942845	0.242332	0.717858	-0.198508	0.888808	0.445601	0.29107	-0.00146882	0.998188	-0.289024	0.330141	-0.282617	0.435541	0.180732	0.812587	-0.0812082	0.994439	-0.261897	0.689915	0.184786	0.682706	-0.0284685	0.952066	-0.209108	0.596695
FBgn0003514	CG3595	X	1403	2413	2717	2110	2359	2199	2000	1953	2327	1862	2029	1847	2075	-0.323608	0.073502	-0.384818	0.0443931	-0.0608811	0.774061	-0.305823	0.358898	-0.00821888	0.998294	-0.560209	0.00629877	-0.173947	0.62117	-0.151376	0.620119	-0.105318	0.867901	-0.22014	0.612177	-0.138525	0.924782	0.0633787	0.934049	-0.481231	0.0165341	-0.241202	0.220263	0.048947	0.919886
FBgn0003515	CG4314	3L	2146	19810	20219	26715	25291	23572	20938	25719	24530	25247	22811	25036	24692	0.238812	0.0892778	0.0442703	0.856421	-0.194404	0.118601	0.227819	0.425785	0.00208163	0.998808	0.0792492	0.797263	0.0390256	0.95383	-0.039643	0.928203	0.135569	0.707924	-0.149548	0.747507	-0.0428499	0.994746	0.094044	0.879636	0.193215	0.353348	-0.152397	0.483267	0.191775	0.40305
FBgn0003517	CG14792	X	1109	31169	32370	32298	32863	30458	28986	31547	30126	31389	28381	30781	32002	-0.096341	0.585476	-0.197814	0.293306	-0.102285	0.454488	-0.118081	0.817163	-0.025817	0.998294	-0.257979	0.288376	-0.0583999	0.926849	-0.0295525	0.943954	0.0579846	0.944279	-0.131862	0.783641	-0.00511278	0.996482	0.113908	0.8374	-0.128029	0.60241	-0.163025	0.44033	0.0723296	0.825242
FBgn0003520	CG5753	2R	5240	1203	1220	1199	1115	1159	1184	1170	1189	1139	1833	1063	1169	-0.195316	0.311025	-0.148032	0.543695	0.0472029	0.846114	-0.11133	0.855733	0.0714234	0.998294	0.0861537	0.854445	0.213773	0.72461	-0.0267066	0.964345	-0.0802902	0.932281	0.18543	0.786251	-0.100208	0.970023	-0.277065	0.650228	-0.223612	0.37174	0.267043	0.438918	0.0288177	0.954482
FBgn0003557	CG4244	2L	4612	7186	7984	11086	10822	8218	6703	9626	10641	8287	7751	9902	8087	0.38614	0.00818258	-0.130264	0.60115	-0.518384	1.9248e-05	0.304491	0.295613	-0.0545431	0.998294	-0.0979626	0.748826	0.0332785	0.962571	-0.236068	0.295633	0.226421	0.547786	-0.404446	0.108074	-0.177504	0.848148	0.196695	0.698195	0.125017	0.707655	-0.479371	0.000712974	0.446789	0.0232434
FBgn0003559	CG17170	X	2909	850	759	970	884	884	759	1003	807	926	926	831	879	0.0685768	0.805778	-0.07466	0.801031	-0.143177	0.495964	0.0757716	0.925931	0.0137544	0.998294	0.0180636	0.969146	0.0906453	0.903762	-0.0847657	0.865125	0.0380426	0.976538	-0.0578394	0.947943	-0.0967925	0.978322	-0.052885	0.953311	-0.0243353	0.95734	-0.0466269	0.893839	0.1525	0.704154
FBgn0003567	CG8573	3R	3682	612	572	818	741	811	773	685	711	664	1167	814	859	0.253746	0.229782	0.30349	0.170471	0.0503661	0.845352	0.139198	0.822696	-0.0928361	0.998294	0.375131	0.350335	0.0945363	0.927606	0.11215	0.794675	0.0555252	0.96007	0.219667	0.766806	0.204032	0.749093	-0.0444107	0.973228	0.368019	0.0997459	0.14241	0.762178	-0.152427	0.657441
FBgn0003575	CG6222	X	4901	1494	1483	2012	1868	1939	2476	1805	1808	1746	1806	2198	2122	0.241939	0.150658	0.447384	0.0665959	0.212523	0.380736	0.180685	0.66063	-0.0460513	0.998294	0.0662584	0.842368	-0.347973	0.350771	0.165901	0.47145	-0.0468837	0.976453	-0.117105	0.817813	0.207266	0.633215	0.313679	0.233996	0.408942	0.024015	-0.169873	0.433369	-0.255199	0.464119
FBgn0003598	CG8599	3R	5051	608	492	717	706	800	669	715	623	739	1633	728	668	0.228443	0.349861	0.295502	0.264486	0.0696413	0.783527	0.174217	0.792243	-0.0322297	0.998294	0.748055	0.0612758	0.433107	0.430667	-0.00395555	0.996112	-0.0772508	0.944592	0.515207	0.342982	0.026802	0.996169	-0.457241	0.416576	0.218213	0.498615	0.533025	0.178952	-0.104419	0.812029
FBgn0003607	CG8409	2L	1109	968	885	1151	1205	985	940	1174	963	1168	1444	993	1004	0.206864	0.291032	-0.048686	0.867942	-0.256286	0.104627	0.108441	0.884852	-0.077015	0.998294	0.287216	0.309442	0.327495	0.304445	-0.198345	0.386706	0.0325458	0.976538	0.164528	0.777596	-0.111801	0.970023	-0.290702	0.449862	-0.00520097	0.991398	0.0890497	0.765265	0.161869	0.657245
FBgn0003612	CG8068	2R	2943	1208	1116	1175	1130	1416	1291	1175	1167	1333	2243	1300	1207	-0.14157	0.500684	0.110346	0.65394	0.254054	0.0898521	-0.0652649	0.927066	0.0674272	0.998294	0.380495	0.285013	0.261939	0.631907	0.132381	0.686023	-0.115514	0.846895	0.414714	0.373578	0.0604505	0.994439	-0.349917	0.513585	-0.00379269	0.993623	0.506206	0.0857872	-0.17859	0.531886
FBgn0003638	CG3019	X	4836	4448	3536	6147	5634	6949	6614	6022	4227	6486	6041	6548	6603	0.414622	0.0198756	0.637772	0.000566959	0.228281	0.0789507	0.234673	0.674734	-0.122074	0.998294	0.443774	0.0707835	-0.174188	0.628421	0.17158	0.365789	-0.0580197	0.944592	0.170737	0.783641	0.275971	0.629933	0.11443	0.83359	0.581839	0.00236386	0.0414916	0.882808	-0.357633	0.216892
FBgn0003651	CG11502	3R	3859	219	172	247	265	194	193	212	206	125	165	180	183	0.237184	0.484273	-0.109471	0.793892	-0.350095	0.184228	0.0119253	0.991676	-0.186379	0.941098	-0.50769	0.276975	-0.357542	0.566331	-0.375692	0.181606	-0.0874561	0.954265	-0.47134	0.406275	-0.187426	0.899374	0.259271	0.758669	-0.198399	0.659907	-0.719709	0.0368388	0.120009	0.825949
FBgn0003654	CG18000	X	3070	3594	3599	4764	4808	4411	3681	4463	4580	4300	4044	4060	4188	0.27281	0.0516329	0.0590773	0.81936	-0.212435	0.142245	0.229283	0.446922	-0.0276771	0.998294	0.030499	0.936242	-0.0228223	0.974676	-0.182415	0.263036	0.0121365	0.993536	-0.199426	0.608286	-0.151744	0.817915	0.0341567	0.965524	0.0807697	0.774456	-0.235273	0.214959	0.178078	0.526494
FBgn0003656	CG2212	X	5571	2611	2882	3458	3569	2995	3048	3248	2906	2767	3650	2902	3187	0.214966	0.225211	0.0317689	0.914688	-0.183662	0.218686	0.07209	0.921791	-0.127211	0.94796	0.0284218	0.948186	0.00272503	0.996581	-0.172446	0.411471	-0.00741302	0.995323	-0.0435983	0.956426	-0.0419592	0.994746	-0.0112496	0.992539	0.032145	0.932557	-0.180265	0.433187	0.0439121	0.920008
FBgn0003660	CG12210	2R	1139	5184	5077	4325	4489	5494	5582	4295	4413	4968	4728	4735	4937	-0.346581	0.00928075	0.00600169	0.983895	0.353468	0.00383314	-0.29679	0.228529	0.0319804	0.998294	-0.253765	0.280986	-0.248242	0.401543	0.14851	0.460151	-0.199269	0.459184	0.0527726	0.935451	0.110553	0.926012	0.0467619	0.948348	-0.193495	0.368089	0.0880583	0.71538	-0.314513	0.110839
FBgn0003676	CG5374	3R	1980	2092	2654	1911	1916	1824	1972	1608	1883	1590	2490	1886	1817	-0.428725	0.0299029	-0.407276	0.0911257	0.0195891	0.941086	-0.456857	0.116743	-0.0699353	0.998294	-0.381096	0.270391	0.0118977	0.988682	-0.0228903	0.964345	-0.0503075	0.965006	0.0938556	0.915974	0.0467809	0.994746	-0.0591206	0.955557	-0.448636	0.0571678	0.0269145	0.948831	-0.0952733	0.829406
FBgn0003687	CG9874	2R	1387	252	244	258	236	279	246	277	257	245	456	224	247	-0.131339	0.701739	-0.0239872	0.954821	0.108378	0.743504	0.0196684	0.989032	0.128462	0.998294	0.242587	0.652041	0.230127	0.785275	-0.0368743	0.96472	-0.141399	0.877291	0.197591	0.832069	-0.173577	0.90911	-0.322207	0.673043	-0.174456	0.665487	0.341451	0.47289	0.0438037	0.94479
FBgn0003714	CG7925	X	1596	556	561	549	539	455	484	509	437	438	509	509	528	-0.165926	0.49311	-0.338875	0.163753	-0.174145	0.461054	-0.285504	0.447466	-0.126092	0.992359	-0.394298	0.20657	-0.0582013	0.948936	-0.0411028	0.951334	0.107411	0.899535	-0.087715	0.920943	0.0874077	0.982745	0.161243	0.828342	-0.210679	0.472843	-0.232817	0.455457	0.0272998	0.965042
FBgn0003716	CG14026	2L	3616	3873	4223	4538	4781	4322	6374	4324	4617	4336	4999	5607	6236	0.0665982	0.771131	0.28632	0.382816	0.2238	0.437728	0.0547534	0.939099	-0.00680564	0.998294	0.0150952	0.967091	-0.242215	0.646031	0.344533	0.00974995	0.0956379	0.944592	-0.0402072	0.949863	0.339196	0.143945	0.376426	0.0492314	0.417596	0.0288361	-0.0491111	0.823322	-0.223453	0.622
FBgn0003721	CG4898	3R	3054	5776	5994	5799	5896	5954	5512	5562	5485	5248	5534	5197	5493	-0.14089	0.407088	-0.141257	0.498953	-0.000356669	0.999072	-0.162496	0.698657	-0.0281993	0.998294	-0.30261	0.130237	-0.155949	0.608339	-0.101498	0.703828	-0.110358	0.822349	-0.129788	0.743406	-0.0729367	0.978322	0.042135	0.946911	-0.245582	0.230387	-0.163496	0.283828	-0.0302815	0.941859
FBgn0003731	CG10079	2R	6124	1361	1175	1375	1570	1576	1421	1430	1380	1439	1269	1312	1283	0.0800131	0.770439	0.130418	0.6066	0.0512646	0.830404	0.0596643	0.936049	-0.0141237	0.998294	-0.0787587	0.847742	-0.192923	0.685539	-0.145059	0.659519	-0.205477	0.490972	-0.133933	0.832069	-0.132638	0.903464	-0.00811941	0.994672	-0.0763856	0.820444	-0.15338	0.631017	-0.0672948	0.862295
FBgn0003732	CG10223	2L	5242	1405	994	1405	1319	1544	1363	1328	1589	1499	3440	1694	1444	0.0489591	0.892691	0.162898	0.608319	0.118257	0.522995	0.171265	0.816581	0.130277	0.980694	0.693678	0.0876196	0.495485	0.3109	0.204364	0.450646	0.0850267	0.930561	0.468895	0.412719	0.0628434	0.994439	-0.389268	0.540268	0.257257	0.453511	0.639117	0.079176	0.0280435	0.960385
FBgn0003741	CG16724	3L	862	174	203	247	258	316	275	309	219	244	222	219	228	0.266014	0.404732	0.504939	0.0724371	0.239755	0.369206	0.314226	0.564587	0.0820568	0.998294	0.103544	0.86413	-0.322274	0.578294	-0.123765	0.848827	-0.345542	0.315962	-0.205453	0.813768	-0.204662	0.886699	-0.00507666	0.998527	0.118885	0.803822	-0.136121	0.785585	-0.12611	0.828562
FBgn0003742	CG10128	2R	1568	472	466	476	444	523	463	449	505	522	509	540	502	-0.155501	0.553656	-0.034055	0.921266	0.122437	0.627065	-0.0508161	0.96065	0.0870842	0.998294	-0.0432869	0.934562	-0.00622011	0.992895	0.17665	0.630709	0.0561117	0.966538	0.0102146	0.996335	0.0816739	0.990049	0.0593061	0.954428	0.0358737	0.934748	0.106375	0.788321	-0.0220071	0.971402
FBgn0003744	CG8637	3L	2816	645	620	727	776	777	703	695	715	739	1082	751	657	0.111047	0.657485	0.115489	0.668805	0.0052309	0.985453	0.0664673	0.929778	-0.0349736	0.998294	0.300432	0.393821	0.183501	0.772601	-0.0624744	0.926353	-0.0772153	0.944592	0.220303	0.718423	-0.0288443	0.996169	-0.245577	0.706839	0.0389301	0.926145	0.195748	0.578101	-0.0444683	0.92487
FBgn0003748	CG9364	2R	3354	9096	8098	8638	8726	10607	8876	8555	8646	9654	9076	9385	9704	-0.116618	0.528722	0.0699751	0.78812	0.188335	0.187186	-0.0754256	0.907557	0.0358414	0.998294	-0.0554689	0.86775	-0.117179	0.811906	0.15226	0.381682	-0.040595	0.972428	0.023297	0.975473	0.110177	0.917254	0.0753943	0.907807	0.0365059	0.909746	0.0613582	0.802388	-0.148902	0.611285
FBgn0003862	CG8651	3R	14052	1634	1420	1633	1484	1984	1912	1806	1482	1560	2089	1412	1630	-0.100714	0.673181	0.239166	0.270809	0.343311	0.0135629	0.0205848	0.983784	0.110321	0.998294	0.0599716	0.882158	-0.161297	0.743295	-0.0113384	0.982563	-0.340024	0.107825	0.037794	0.966749	-0.12392	0.956978	-0.173684	0.782263	-0.113546	0.730846	0.15983	0.568529	-0.213169	0.484145
FBgn0003863	CG18444	2R	860	172	79	53	46	79	170	89	101	84	210	171	185	-1.14093	0.00444215	-0.0724117	0.921266	1.03972	0.00966269	-0.296464	0.716947	0.543407	0.0847542	0.0131266	0.991033	0.0553516	0.966942	1.23061	9.29113e-09	0.26804	0.739997	0.265793	0.777256	0.643062	0.0302906	0.173538	0.881763	0.320006	0.576388	0.845788	0.0656201	-0.285759	0.692611
FBgn0003866	CG1374	2L	4732	1552	1365	1579	1509	1859	1725	1715	1826	1845	1706	1824	1638	-0.04971	0.85191	0.185747	0.415176	0.238358	0.0942729	0.179814	0.705966	0.225058	0.465539	0.0969829	0.78093	-0.0769744	0.915645	0.172619	0.505913	-0.0603529	0.954265	-0.0855037	0.90143	-0.05716	0.994439	0.0154069	0.989889	0.128696	0.678535	0.147983	0.578908	0.00519544	0.990933
FBgn0003870	CG1856	3R	4564	2363	1689	1477	1478	2628	1650	1765	1697	2417	2499	2094	1280	-0.559164	0.00692684	-0.0330398	0.942445	0.521744	0.0166695	-0.266786	0.546217	0.255087	0.269367	0.0891802	0.825589	0.114884	0.889898	0.16578	0.77892	-0.250951	0.719531	0.378923	0.116313	-0.0506546	0.994746	-0.377076	0.473803	-0.334244	0.409569	0.661737	1.02352e-06	-0.25058	0.536354
FBgn0003882	CG10520	3R	2006	319	307	403	404	345	315	391	367	322	685	396	375	0.221591	0.39293	-0.028842	0.939985	-0.250668	0.273114	0.167854	0.801807	-0.0322228	0.998294	0.388272	0.43431	0.35492	0.58839	-0.036767	0.961131	0.177949	0.773162	0.203529	0.828741	-0.00541715	0.996482	-0.195748	0.850888	0.175553	0.619457	0.191999	0.727857	0.207394	0.58047
FBgn0003884	CG1913	3R	1752	16190	16988	9994	10905	10656	9996	10253	14194	11541	14888	8888	10817	-0.783934	4.6202e-10	-0.772562	7.12115e-08	0.0110449	0.960756	-0.450548	0.13259	0.227204	0.77021	-0.500825	0.00979493	0.25773	0.352714	-0.0569773	0.923856	-0.0772448	0.935435	0.00188502	0.999109	-0.281641	0.649794	-0.325038	0.332912	-0.830496	2.01714e-06	0.272026	0.12724	0.248721	0.488302
FBgn0003885	CG2512	3R	1980	2956	3365	2359	2379	2224	2254	2260	2834	2584	2677	2308	2542	-0.535868	0.000445433	-0.583237	0.00138043	-0.0501065	0.803846	-0.345407	0.303452	0.134436	0.980694	-0.430881	0.0499175	0.146666	0.712066	0.0525335	0.919291	0.0881359	0.899535	-0.0505837	0.950333	-0.0893483	0.982355	-0.0566596	0.93816	-0.47685	0.0161586	0.0987364	0.64555	0.195312	0.587776
FBgn0003887	CG9277	2R	1701	5762	5574	2910	3312	3396	3470	2635	4305	3545	7897	2279	3293	-0.974631	1.71517e-13	-0.80635	9.36401e-08	0.168262	0.34708	-0.63951	0.0309232	0.153428	0.992359	-0.17043	0.733094	0.489512	0.290698	-0.114254	0.855988	-0.268188	0.527954	0.276244	0.766806	-0.252642	0.8216	-0.654734	0.0945265	-1.0649	7.05431e-07	0.511768	0.320449	0.034615	0.963134
FBgn0003888	CG3401	2R	2518	9910	10972	7278	7830	7456	6112	7451	9388	7320	5783	6610	6852	-0.587086	2.92957e-05	-0.710228	3.10224e-05	-0.127193	0.47271	-0.34707	0.282882	0.179174	0.87049	-0.793051	0.000651375	-0.100329	0.89565	-0.135803	0.547143	-0.0232099	0.984855	-0.39602	0.338763	-0.309529	0.386177	0.0762197	0.934992	-0.722853	6.37989e-06	-0.228932	0.419547	0.318	0.251991
FBgn0003890	CG4869	3R	1701	5482	6188	4623	5111	3568	4153	4834	5498	4120	4197	4744	5181	-0.385504	0.0194578	-0.670058	0.000811065	-0.290839	0.110856	-0.233396	0.54707	0.122895	0.978841	-0.646572	0.000481984	0.0265606	0.972921	0.0469529	0.928203	0.302079	0.272414	-0.385495	0.126984	-0.081103	0.979419	0.29086	0.233996	-0.335548	0.111852	-0.266985	0.113813	0.412363	0.0861552
FBgn0003891	CG9450	2R	8830	16500	13756	17976	16286	18252	17236	18693	14231	17535	16470	16830	15556	0.0451805	0.866848	0.121704	0.614341	0.0782407	0.640774	0.0336733	0.974558	-0.00574878	0.998294	-0.0116827	0.979056	-0.125402	0.754356	-0.0541198	0.914525	-0.138742	0.723693	-0.0446777	0.957489	-0.0460915	0.994746	-0.0150294	0.987456	-0.0136319	0.976604	-0.0545435	0.835168	-0.0830591	0.853246
FBgn0003892	CG2411	2R	5521	498	545	449	512	1355	1065	508	529	886	667	733	706	-0.241082	0.336202	1.05696	3.66805e-08	1.30236	2.83915e-16	-0.0811116	0.921791	0.135223	0.985295	0.354146	0.363193	-0.57997	0.0841858	0.529753	0.00189704	-0.67113	0.000160005	0.403471	0.422161	0.388218	0.131691	-0.0491205	0.968684	0.332114	0.183566	0.565671	0.0768875	-1.12603	9.1697e-10
FBgn0003941	CG2960	2L	659	17529	17276	20702	21466	15945	15513	18996	17481	16659	15987	16980	18484	0.140408	0.372227	-0.245645	0.162245	-0.387725	0.000212181	-0.0148536	0.987606	-0.14588	0.815731	-0.265528	0.218088	-0.0181823	0.976442	-0.21529	0.149838	0.144739	0.693286	-0.242754	0.437179	-0.065971	0.986488	0.16199	0.685971	-0.084536	0.758541	-0.404219	0.00263706	0.226429	0.297093
FBgn0003942	CG5271	2L	592	23412	20146	26283	26786	21433	20930	25400	20202	24288	22745	24379	24873	0.148572	0.418704	-0.140447	0.534255	-0.291482	0.00732617	-0.0155776	0.989825	-0.147145	0.939127	-0.0671641	0.836351	0.0743483	0.894721	-0.0813076	0.760695	0.187841	0.434425	-0.0472012	0.951322	0.071673	0.994081	0.11208	0.827053	0.0623035	0.837423	-0.213195	0.226769	0.119772	0.753502
FBgn0003943	CG11624	3L	2759	20516	20502	20845	19880	16726	23153	15789	13000	13306	16296	18393	20418	-0.142108	0.367969	-0.129624	0.702864	0.00760229	0.984184	-0.542498	0.00660125	-0.399142	0.0261042	-0.640242	6.37144e-05	-0.454295	0.147799	-0.0441351	0.927493	-0.0540735	0.973858	-0.0601675	0.930247	0.355729	0.175408	0.42122	0.0224002	-0.188107	0.40678	-0.502573	1.67645e-05	-0.418866	0.175608
FBgn0003944	CG10388	3R	4282	65	26	75	82	36	33	62	50	29	23	61	57	0.484849	0.361708	-0.358095	0.57794	-0.933907	0.0117107	0.111873	0.929033	-0.23299	0.918123	-0.461507	0.473979	-0.164041	0.881785	-0.225546	0.710289	0.403307	0.42219	-0.510079	NA	0.0262981	0.996169	0.449921	0.453805	0.186384	0.809617	-0.912604	0.0422194	0.534732	0.316372
FBgn0003961	CG7171	2L	1262	115052	118814	45195	61429	72590	53775	42056	59131	53304	53802	43827	73060	-1.21349	2.03858e-12	-0.965585	4.30734e-08	0.254263	0.294271	-1.10976	7.7179e-08	-0.0166738	0.998294	-1.27145	5.03202e-20	-0.282798	0.374519	0.0855375	0.929681	-0.0966203	0.95094	-0.0181538	0.986164	0.125558	0.978322	0.145407	0.869564	-1.01839	6.10237e-05	-0.039695	0.908481	-0.265559	0.502587
FBgn0003963	CG2762	2L	6084	112	122	142	131	316	323	126	136	133	191	147	134	0.0787736	0.872931	1.25205	2.9489e-07	1.17236	2.46082e-08	0.0616037	0.962998	-0.00477583	0.998294	0.215487	0.71575	-0.800735	0.019181	0.0467708	0.961278	-0.964875	3.84672e-06	0.13523	0.903969	0.0516319	0.994746	-0.0881567	0.947389	0.132349	0.806242	0.14419	0.806389	-1.14827	8.61672e-07
FBgn0003964	CG4380	X	3038	975	946	1305	1345	1145	1187	1197	1209	1082	1518	1132	1177	0.321533	0.0512312	0.170309	0.484976	-0.149782	0.428669	0.220937	0.546217	-0.0787397	0.998294	0.224497	0.500845	0.0625901	0.941187	-0.162706	0.519482	-0.0302598	0.979981	0.0011579	0.999109	-0.0823277	0.978322	-0.0909618	0.929098	0.145729	0.604616	-0.0806309	0.82303	0.0620746	0.884078
FBgn0003969	CG9209	X	4340	234	214	545	552	374	260	378	334	393	671	411	365	1.103	2.78694e-09	0.360616	0.270328	-0.723738	0.000534432	0.498429	0.0913956	-0.47823	0.0216496	0.889734	0.0131778	0.485767	0.340729	-0.410767	0.0422707	0.222717	0.732115	0.358662	0.559642	0.0783959	0.994439	-0.274344	0.721298	0.63162	0.0118036	-0.0929607	0.860109	0.176692	0.723578
FBgn0003977	CG3496	2R	5867	710	730	871	828	882	743	815	793	815	850	798	738	0.10089	0.682482	0.063073	0.836795	-0.0368757	0.890132	0.0683593	0.927066	-0.024299	0.998294	0.0219811	0.962021	-0.0335713	0.967483	-0.110059	0.800276	-0.0847899	0.933413	-0.0460883	0.956426	-0.0861314	0.979419	-0.0519207	0.955027	-0.0201156	0.964955	-0.0741578	0.821585	0.00876307	0.988557
FBgn0003978	CG10728	2L	1310	116	140	141	181	140	165	164	129	152	207	191	204	0.174463	0.695427	0.135364	0.773299	-0.0406151	0.937269	0.0827148	0.940065	-0.0558225	0.998294	0.233912	0.678315	0.102401	0.933421	0.232334	0.630945	0.266377	0.649631	0.130694	0.90846	0.302457	0.672091	0.138505	0.906509	0.456553	0.198507	0.0765828	0.899291	-0.0360655	0.966273
FBgn0003984	CG10491	3L	5102	389	448	433	422	595	412	402	456	319	326	413	332	-0.09936	0.75683	0.142846	0.695467	0.242703	0.379344	-0.0408769	0.970628	0.0475288	0.998294	-0.503396	0.145202	-0.568682	0.128499	-0.144246	0.789486	-0.348212	0.382241	-0.429777	0.34305	-0.19074	0.884281	0.204376	0.806251	-0.261449	0.466674	-0.408872	0.176581	-0.183392	0.700534
FBgn0003996	CG2759	X	2352	17173	19033	15556	15784	10371	10174	14628	15765	12629	11767	16168	13174	-0.335563	0.023287	-0.898785	4.31901e-09	-0.571294	9.60561e-09	-0.307446	0.265143	0.0074835	0.998294	-0.719558	0.000103624	0.165181	0.645871	-0.0646856	0.913946	0.444745	0.0221438	-0.386791	0.119034	-0.071806	0.994439	0.286874	0.453805	-0.398268	0.0770948	-0.393797	0.00806591	0.56524	0.000408256
FBgn0003997	CG5123	3L	4018	95	79	80	89	197	142	79	84	39	66	95	146	-0.150774	0.771879	0.761049	0.0241045	0.907711	0.00170512	-0.125575	0.911641	-4.93443e-08	1	-0.614159	0.281662	-1.01386	0.00620559	0.316571	0.482237	-0.332855	0.54611	-0.392238	NA	0.335439	0.684106	0.57374	0.26793	0.296724	0.586305	-0.455527	0.405992	-0.879326	0.00544288
FBgn0004045	CG2985	X	1611	5366	2007	12769	4033	7217	12521	4636	2583	2545	3817	4139	8831	0.417506	0.51177	0.739837	0.233216	0.122237	0.875	-0.0349956	0.98257	-0.186269	0.876568	-0.229156	0.754841	-1.35184	2.44582e-07	-0.0581195	0.938981	-0.202546	0.835962	-0.229591	0.765643	0.259488	0.824596	0.463878	0.451605	0.352654	0.636543	-0.598329	0.238521	-0.859131	0.0865681
FBgn0004047	CG11129	X	1868	2322	1020	8099	2861	5711	10129	2935	1555	1521	2954	3145	6497	0.708555	0.206783	1.28525	0.0156551	0.270304	0.691173	0.123066	0.921428	-0.211459	0.815731	0.122932	0.884735	-0.853307	0.0387695	-0.0304359	0.969451	-0.23	0.779632	-0.0873847	0.944401	0.335765	0.653863	0.427083	0.498534	0.733587	0.206979	-0.54629	0.292335	-1.02442	0.0312141
FBgn0004049	CG9764	3R	4464	770	765	882	875	968	923	879	835	925	1226	836	891	0.0589436	0.825752	0.188883	0.42347	0.131479	0.496797	0.0685878	0.925288	0.0142246	0.998294	0.273402	0.381663	0.0922499	0.905396	-0.00191158	0.999467	-0.134324	0.815796	0.195168	0.721489	-0.0182289	0.996169	-0.218705	0.698195	0.0535099	0.878704	0.218908	0.443959	-0.114853	0.75321
FBgn0004050	CG7803	X	2599	467	536	492	487	486	466	513	522	503	613	507	526	-0.162423	0.553841	-0.17373	0.553332	-0.010983	0.974471	-0.0339622	0.974882	0.113242	0.998294	-0.034452	0.95064	0.129475	0.869193	0.0884496	0.875009	0.0883764	0.932119	0.00226244	0.999109	-0.030052	0.996169	-0.0427093	0.969331	-0.0685923	0.864818	0.123468	0.737615	0.134403	0.738071
FBgn0004055	CG3533	2R	4114	83	87	78	62	198	267	70	57	150	172	126	100	-0.352262	0.431728	1.21	8.42051e-05	1.54092	3.83877e-08	-0.349496	0.573452	-0.046554	0.998294	0.576116	0.234564	-0.432669	0.447341	0.431444	0.222686	-0.734867	0.00832259	0.809119	0.063902	0.513967	0.223739	-0.281484	0.741666	0.253665	0.629126	0.841526	0.0333522	-1.5601	8.45191e-08
FBgn0004057	CG12529	X	2092	7986	8338	8337	8091	8808	8048	8423	10420	9062	7248	10150	7647	-0.123015	0.484313	-0.0595653	0.802873	0.0641023	0.689815	0.111757	0.876579	0.217801	0.671305	-0.167252	0.615646	-0.10167	0.884357	0.121835	0.800634	0.0547568	0.971672	-0.264888	0.595708	-0.0938029	0.984115	0.146814	0.855688	0.0101318	0.986094	-0.0475101	0.893749	0.175234	0.609849
FBgn0004066	CG3422	X	1176	2992	2937	2401	2365	2023	2092	2050	2321	2163	2780	2192	2341	-0.44002	0.00085839	-0.613332	0.00020129	-0.177228	0.271908	-0.475659	0.0254	-0.0644027	0.998294	-0.434387	0.0469324	0.166361	0.712592	-0.0465099	0.926353	0.110221	0.852982	0.0625263	0.933343	0.018097	0.996169	-0.056417	0.945222	-0.485245	0.00401503	-0.00354954	0.990024	0.102521	0.796934
FBgn0004087	CG14887	3R	662	89	107	388	381	60	33	268	187	63	122	220	245	1.6993	3.17932e-14	-0.987033	0.0160718	-2.69175	1.93911e-27	0.843475	0.00518529	-0.515382	0.0548176	-0.19934	0.773878	0.39634	0.564312	-0.584192	0.00272424	1.49439	2.03717e-10	-0.868003	0.0437743	0.00110542	0.999257	0.789475	0.0350341	1.00886	0.000389192	-1.61345	2.92552e-07	1.8616	1.93621e-09
FBgn0004101	CG3411	2R	3792	217	168	244	195	211	215	218	212	199	349	193	182	0.0515079	0.916038	0.0397625	0.932776	-0.0119412	0.979166	0.063203	0.957938	0.0163115	0.998294	0.248184	0.655698	0.18958	0.843621	-0.154023	0.809462	-0.160885	0.85212	0.16684	0.874064	-0.182561	0.907019	-0.302887	0.702549	-0.135336	0.783172	0.195653	0.725283	0.0308762	0.965042
FBgn0004103	CG5650	3R	2203	4552	5069	4889	4746	5364	4946	4821	5092	4992	5427	4986	4876	-0.129752	0.515897	-0.0074612	0.980829	0.123949	0.384804	-0.0370276	0.967298	0.0859146	0.998294	-0.0702103	0.814889	-0.0576581	0.915738	0.0537918	0.894812	-0.0754042	0.905843	-0.029466	0.964688	-0.0358879	0.994746	-0.0199714	0.975894	-0.076507	0.806968	0.0607749	0.755362	-0.0325135	0.941163
FBgn0004107	CG10498	3R	2224	75	109	87	117	110	98	112	78	87	470	151	142	0.0106983	0.987535	0.0587009	0.920611	0.0479033	0.931493	-0.0277763	0.987606	-0.028881	0.998294	0.756524	0.186017	0.508548	0.378914	0.362834	0.338037	0.349925	0.446266	0.560838	0.359749	0.406328	0.451626	-0.278366	0.736058	0.4733	0.270087	0.638066	0.208998	-0.0908608	0.912613
FBgn0004108	CG9704	3L	4158	149	153	299	310	179	130	268	322	205	291	200	216	0.81937	0.000408509	-0.0717316	0.882272	-0.883391	0.000134143	0.722371	0.00813773	0.00546668	0.998294	0.432985	0.34551	0.424676	0.464694	-0.428781	0.0732585	0.314056	0.520056	-0.277923	0.697644	-0.426522	0.236996	-0.133027	0.913042	0.316145	0.395686	-0.300231	0.471547	0.853339	0.00209417
FBgn0004117	CG4843	3R	1980	461	405	402	441	352	375	492	550	417	366	270	461	-0.163877	0.560176	-0.337358	0.208569	-0.173763	0.512013	0.161792	0.808774	0.296244	0.416897	-0.290067	0.465498	0.0283718	0.979848	-0.129689	0.865775	-0.00962625	0.995323	-0.424734	0.359749	-0.390443	0.46089	-0.0330909	0.981893	-0.316709	0.468071	-0.132451	0.765442	0.501807	0.0442588
FBgn0004132	CG30498	2R	704	413	405	368	373	418	444	369	355	400	440	430	419	-0.264391	0.267897	-0.0265108	0.942892	0.237942	0.316581	-0.227748	0.630491	0.0152093	0.998294	-0.135974	0.744636	-0.0983433	0.916143	0.189156	0.601315	-0.0353591	0.980894	0.0954897	0.915423	0.170633	0.883672	0.0614559	0.954342	-0.056954	0.886451	0.117285	0.770876	-0.216699	0.560185
FBgn0004167	CG12008	3L	13783	11429	14417	13967	13440	14374	15591	12073	12050	11057	9916	14434	13846	-0.0496491	0.869706	0.10456	0.734469	0.157477	0.348457	-0.164469	0.786121	-0.123209	0.887855	-0.454142	0.0811204	-0.540955	0.00847059	0.0650817	0.855988	-0.0948467	0.89097	-0.276718	0.413903	0.183713	0.670661	0.443351	0.0341292	0.0130522	0.980804	-0.413327	0.0127821	-0.282138	0.206318
FBgn0004169	CG7107	X	1696	650	452	507	631	520	506	667	599	555	509	379	623	-0.0786543	0.85191	-0.193369	0.572783	-0.11479	0.691159	0.0996622	0.917549	0.166855	0.963419	-0.20286	0.653083	-0.016353	0.98642	-0.116749	0.8865	-0.0401258	0.983608	-0.300413	0.544576	-0.274347	0.772305	-0.0254648	0.98768	-0.218742	0.662923	-0.126683	0.768159	0.305911	0.252066
FBgn0004177	CG7109	2L	3102	9882	10283	11069	11216	11645	11538	10748	11375	11433	11825	11172	11118	0.00956959	0.967084	0.0937741	0.679271	0.0855491	0.581888	0.046821	0.948517	0.0386484	0.998294	0.0194898	0.955597	-0.0676581	0.888882	0.0222343	0.96055	-0.0701306	0.919919	-0.0276843	0.966749	-0.0192254	0.996169	-0.00447981	0.996008	0.0291994	0.928791	0.0122817	0.952216	-0.0446455	0.913233
FBgn0004179	CG6395	3L	2895	4914	4901	4601	4674	5040	4708	4598	4494	4608	4773	4384	4405	-0.211775	0.151251	-0.113615	0.593172	0.0986546	0.509513	-0.180188	0.619743	0.0214709	0.998294	-0.242437	0.256565	-0.123395	0.734139	-0.0520574	0.898388	-0.155871	0.620335	-0.0528325	0.928237	-0.074233	0.978322	-0.03532	0.955883	-0.265468	0.16034	-0.0320418	0.886671	-0.075798	0.820586
FBgn0004198	CG11387	X	11062	10949	9945	12219	11134	15342	18486	11394	12976	12380	10334	15507	13558	0.0263441	0.916038	0.572635	0.00523446	0.550179	0.000668176	0.128294	0.825417	0.102079	0.99616	-0.0538057	0.891652	-0.574215	0.0241178	0.312756	0.0495036	-0.209818	0.646243	-0.17685	0.748657	0.197367	0.776607	0.35852	0.306478	0.349969	0.0806833	-0.0771632	0.807874	-0.427806	0.081169
FBgn0004227	CG4211	X	6746	1686	1377	1823	1697	2146	1995	1800	1472	2042	2155	1897	1945	0.0655658	0.81626	0.318573	0.142983	0.257532	0.0654466	0.0108179	0.991676	-0.0469692	0.998294	0.255342	0.357743	-0.0521016	0.93611	0.13907	0.597105	-0.115886	0.823633	0.236187	0.573546	0.177597	0.832122	-0.06545	0.929098	0.205081	0.458455	0.196748	0.321904	-0.302657	0.223981
FBgn0004237	CG12749	3R	2759	2637	2485	2787	2765	2805	3138	2435	2668	2765	3468	2862	3061	-0.0170828	0.945434	0.109256	0.6828	0.127437	0.526503	-0.0800615	0.906194	-0.0626272	0.998294	0.0878388	0.77292	-0.0140099	0.985195	0.109233	0.70084	-0.0233003	0.986471	0.166761	0.722834	0.165521	0.81963	-0.0107682	0.992539	0.0927646	0.744586	0.107395	0.645499	-0.190764	0.564621
FBgn0004359	CG5507	3R	2449	1904	2159	1986	2110	2121	1845	1947	1953	2054	1830	1769	1848	-0.119704	0.600909	-0.13922	0.579191	-0.0194382	0.935616	-0.13	0.827973	-0.0170845	0.998294	-0.231275	0.452721	-0.0890789	0.900704	-0.146047	0.565407	-0.136387	0.776406	-0.0929288	0.892325	-0.128281	0.904689	-0.0450961	0.961266	-0.27146	0.253494	-0.114151	0.706515	-0.000244563	0.999856
FBgn0004362	CG17950	2R	1495	931	661	1301	1201	974	833	1309	1182	1130	3025	1191	1281	0.492912	0.0292163	0.0723343	0.848952	-0.430778	0.00402347	0.482991	0.1047	0.0400726	0.998294	0.933631	0.0227211	0.75251	0.0588458	0.0049607	0.993378	0.394019	0.0474645	0.424534	0.515468	-0.0377442	0.994746	-0.415527	0.518335	0.488608	0.0620396	0.502727	0.247391	0.463333	0.0218351
FBgn0004363	CG6647	2L	2625	38920	41246	32050	33307	32859	33790	33074	33337	32962	34058	29721	34374	-0.420934	0.00118712	-0.361228	0.0406538	0.0580015	0.751135	-0.329837	0.146438	0.0700942	0.998294	-0.430505	0.0134478	-0.0650616	0.898256	-0.00538658	0.992199	-0.0693919	0.944529	-0.0838766	0.855936	-0.0756159	0.980613	-0.00803634	0.992539	-0.42177	0.0254162	-0.0126066	0.950332	0.0143159	0.975039
FBgn0004364	CG8896	2R	5422	59	49	115	93	50	44	84	99	37	60	100	94	0.684933	0.0709492	-0.252344	0.651044	-0.937187	0.00586426	0.461141	0.34862	-0.079063	0.998294	-0.214265	0.76961	-0.0176374	0.988682	-0.0499288	0.961278	0.640256	0.047948	-0.547805	NA	0.0354779	0.996169	0.499605	0.392108	0.608245	0.146171	-0.726634	0.119696	0.790828	0.0412649
FBgn0004367	CG4252	X	7899	108	81	196	173	204	150	144	142	184	358	246	151	0.742415	0.0161223	0.710571	0.0387227	-0.0329104	0.945016	0.387475	0.435533	-0.226131	0.877195	0.990424	0.0246891	0.337892	0.634518	0.0847495	0.929373	0.102636	0.954265	0.532065	0.374978	0.296331	0.771555	-0.202521	0.850888	0.802006	0.0330847	0.360443	0.473858	-0.247212	0.623019
FBgn0004368	CG6899	X	6672	342	349	434	444	578	412	402	324	411	616	388	348	0.201805	0.437389	0.382429	0.177316	0.184868	0.512013	-0.0114321	0.991676	-0.179079	0.936154	0.330665	0.41385	-0.0214208	0.984923	-0.197308	0.590319	-0.355665	0.318093	0.310879	0.613149	-0.00832697	0.996482	-0.313254	0.61791	-0.0215854	0.968255	0.144259	0.747592	-0.381493	0.260403
FBgn0004369	CG11516	3R	7109	1999	2253	2697	2509	2000	2453	2572	2555	2007	2326	1954	2814	0.152371	0.472842	-0.0322093	0.931848	-0.182926	0.428275	0.169193	0.726653	0.0273982	0.998294	-0.155231	0.590827	-0.11001	0.877771	-0.0878345	0.901487	0.059577	0.973386	-0.325803	0.213271	-0.113097	0.977793	0.164824	0.827053	0.0457959	0.926744	-0.307146	0.0634229	0.205552	0.567401
FBgn0004370	CG1817	X	8642	373	471	1442	1232	801	1170	628	652	532	722	978	734	1.44998	8.42024e-15	1.03424	0.000186537	-0.372546	0.172183	0.442535	0.156067	-0.869332	5.36615e-09	0.334539	0.388781	-0.589962	0.114497	-0.51527	0.0115362	-0.171712	0.853307	-0.120156	0.883391	0.32017	0.497007	0.40552	0.400239	0.82935	0.00137227	-1.05681	1.48012e-07	-0.547714	0.0743483
FBgn0004373	CG7004	3L	7175	3739	4560	5012	4793	4979	6017	4834	4263	4355	5090	4564	5242	0.101302	0.690832	0.290021	0.289883	0.193393	0.360022	0.0416482	0.966734	-0.0514603	0.998294	-0.00423053	0.992825	-0.275963	0.431832	0.0210539	0.96896	-0.163717	0.789286	-0.046788	0.944573	0.0690945	0.993888	0.105106	0.853628	0.118291	0.73574	-0.104498	0.570864	-0.242518	0.456525
FBgn0004374	CG10718	2L	3592	709	803	703	769	520	456	636	697	610	666	544	540	-0.166774	0.508684	-0.709424	0.000475852	-0.545911	0.00095149	-0.234239	0.601507	-0.0777057	0.998294	-0.402187	0.17159	0.273429	0.537656	-0.371768	0.0457446	0.119487	0.877291	-0.147462	0.818565	-0.288296	0.460403	-0.153211	0.82816	-0.564521	0.00876385	-0.239876	0.38883	0.446335	0.0543991
FBgn0004380	CG10642	3L	2529	681	709	690	705	656	641	670	788	738	780	697	675	-0.124921	0.608663	-0.198151	0.430095	-0.0734577	0.764221	-0.0118817	0.991485	0.0983859	0.998294	-0.0556272	0.895639	0.135149	0.828035	-0.000890187	0.999677	0.0567587	0.961496	-0.0392769	0.966749	-0.103272	0.977672	-0.0777539	0.931785	-0.127157	0.693416	0.067526	0.846186	0.179427	0.63097
FBgn0004381	CG7293	3L	2998	220	215	117	129	210	118	151	132	180	425	138	98	-0.878783	0.000564952	-0.468711	0.220906	0.372473	0.352859	-0.573995	0.0659442	0.171692	0.983528	0.201747	0.748578	0.44357	0.493526	-0.0232273	0.979186	-0.293353	0.673934	0.593838	0.30535	-0.200076	0.916427	-0.636629	0.165666	-0.879886	0.00401044	0.829957	0.0523356	-0.150501	0.833555
FBgn0004387	CG5658	3R	5530	1767	1774	2046	2150	3337	3750	2054	1900	2634	2984	2386	3151	0.10819	0.591319	0.868788	7.59414e-07	0.766605	3.8992e-08	0.0693743	0.921791	-0.0309403	0.998294	0.458966	0.0191614	-0.384822	0.113164	0.367803	0.0737091	-0.321896	0.319546	0.378042	0.108156	0.387384	0.204419	0.0324005	0.97385	0.501245	0.0294189	0.35763	0.0156133	-0.78316	1.22241e-05
FBgn0004390	CG6721	3L	5434	728	713	1026	895	1367	1464	1107	659	1100	1484	815	1255	0.270858	0.183312	0.840896	2.84749e-06	0.571767	0.00029191	0.165285	0.849438	-0.050446	0.998294	0.604366	0.0182602	-0.192878	0.70477	0.101269	0.894812	-0.375596	0.298802	0.352413	0.54736	0.137389	0.977793	-0.199483	0.81094	0.373051	0.270999	0.342717	0.192748	-0.590775	0.0600189
FBgn0004391	CG9198	X	6481	240	297	346	293	301	263	291	318	339	646	366	312	0.106876	0.783255	-0.0358879	0.934507	-0.144068	0.637061	0.0808008	0.932341	-0.01319	0.998294	0.549164	0.22265	0.511278	0.309692	0.0879342	0.913946	0.206489	0.737232	0.419174	0.500224	0.101077	0.980613	-0.306784	0.688888	0.202215	0.624396	0.440632	0.30592	0.12445	0.80288
FBgn0004395	CG4620	3R	6109	681	532	800	742	827	1021	825	463	784	1009	621	1031	0.203783	0.440069	0.479093	0.0777497	0.282022	0.226842	0.00107863	0.998702	-0.141782	0.998294	0.341006	0.318523	-0.111195	0.896022	0.0904347	0.919722	-0.137273	0.904499	0.286804	0.684152	0.213311	0.90911	-0.0426829	0.974465	0.296382	0.489327	0.1501	0.639169	-0.438364	0.287812
FBgn0004396	CG7450	3L	4498	1408	1331	1142	1056	1679	1357	1167	1319	1278	1180	1311	1076	-0.439111	0.00515956	0.0377422	0.901609	0.47673	0.00178058	-0.200243	0.651149	0.200646	0.738791	-0.318037	0.252837	-0.33299	0.349815	0.125195	0.787315	-0.311562	0.313002	-0.10242	0.891654	-0.0768916	0.994439	0.0103152	0.993604	-0.29644	0.251356	0.108653	0.737704	-0.247551	0.402451
FBgn0004397	CG3299	X	3838	1963	2070	1734	1826	1799	1747	1695	1772	1714	1877	1675	1583	-0.306658	0.0567164	-0.283421	0.147658	0.0230555	0.920172	-0.276006	0.346212	0.0126423	0.998294	-0.340231	0.132416	-0.0548973	0.932275	-0.0971683	0.794125	-0.128346	0.80437	-0.0488169	0.94493	-0.109714	0.948007	-0.0753162	0.919788	-0.406918	0.0328122	-0.0372643	0.890777	-0.010411	0.98243
FBgn0004401	CG6143	3L	2792	4305	4301	6137	6035	5506	5196	5494	4806	5153	6261	5230	5491	0.359263	0.00560391	0.203629	0.283005	-0.154741	0.23816	0.161106	0.726497	-0.172201	0.742487	0.208802	0.363357	0.0126469	0.984397	-0.152448	0.413691	-0.0136966	0.99258	0.0400656	0.954864	0.0245748	0.996169	-0.0273715	0.970423	0.196788	0.362822	-0.143434	0.427099	-0.0327383	0.942336
FBgn0004403	CG1524	X	877	20295	17363	22416	24249	18548	18483	21647	17975	20712	19502	21096	21344	0.172189	0.359666	-0.124281	0.598629	-0.298485	0.0152172	-0.00890947	0.991676	-0.16413	0.855672	-0.0826009	0.787288	0.0436935	0.941957	-0.108244	0.675031	0.167457	0.549165	-0.0695079	0.917889	0.061878	0.994439	0.122895	0.79976	0.0577186	0.852908	-0.252076	0.150015	0.111854	0.75971
FBgn0004404	CG1527	X	594	5295	4856	6079	6349	5341	5321	5630	5268	5530	4935	5574	5709	0.155323	0.361317	-0.0324549	0.903601	-0.187979	0.171068	0.0180659	0.983784	-0.127252	0.90645	-0.129306	0.66853	-0.090327	0.883645	-0.1108	0.651592	0.0591964	0.944592	-0.142179	0.77883	0.0175772	0.996169	0.146477	0.786615	0.0379456	0.905318	-0.279399	0.168837	0.0500577	0.898965
FBgn0004406	CG8987	2L	3679	156	182	260	233	239	220	236	270	265	317	288	239	0.377821	0.208702	0.310306	0.358619	-0.0701956	0.848672	0.405089	0.312541	0.068797	0.998294	0.506825	0.219996	0.209809	0.773035	0.0940108	0.909423	0.146865	0.877291	0.0765651	0.945404	0.0214666	0.996169	-0.0610454	0.961648	0.475802	0.146838	0.160154	0.725283	0.149567	0.765928
FBgn0004407	CG33650	2L	1570	319	415	448	427	365	314	413	392	365	333	425	354	0.110125	0.761458	-0.20818	0.543239	-0.324074	0.129471	0.0400404	0.972936	-0.057448	0.998294	-0.222883	0.63506	-0.0237842	0.982557	-0.1205	0.841052	0.152214	0.849366	-0.252422	0.685293	-0.0648525	0.994746	0.163729	0.856999	-0.0274569	0.964805	-0.329321	0.336259	0.251328	0.460282
FBgn0004419	CG4916	2L	1699	2280	2244	2467	2255	2341	2164	2150	2347	2379	9713	2354	2475	-0.0707227	0.751358	-0.109807	0.625151	-0.0387874	0.856473	-0.0834425	0.900985	-0.0160072	0.998294	0.537471	0.386965	0.382566	0.537656	0.051448	0.92127	0.0775085	0.913376	0.399878	0.559169	0.0640804	0.994439	-0.304123	0.650228	-0.0193107	0.960313	0.480813	0.370699	0.01968	0.967809
FBgn0004432	CG9916	X	1227	30059	26374	28452	29147	28302	29349	27255	24338	27690	29249	26831	30257	-0.101435	0.599296	-0.069958	0.789308	0.0317374	0.876236	-0.195032	0.61491	-0.0988069	0.985295	-0.16667	0.464671	-0.0906633	0.832202	0.00904038	0.982563	-0.0310253	0.976891	0.0392818	0.947943	0.104165	0.957701	0.0569813	0.92945	-0.0930903	0.757424	-0.0653575	0.695382	-0.135582	0.666843
FBgn0004435	CG17759	2R	5648	5792	4829	5322	4992	5668	6043	5262	4665	5340	5860	5539	5315	-0.170393	0.395793	0.0378659	0.90292	0.21031	0.178667	-0.163072	0.756092	-0.00336775	0.998294	-0.105018	0.714562	-0.135127	0.726461	0.0913582	0.773397	-0.118601	0.837524	0.0678857	0.904344	0.0895348	0.974662	0.0125497	0.98768	-0.0780142	0.809121	0.0663237	0.740046	-0.210342	0.450321
FBgn0004436	CG2013	3R	2166	3295	3139	3069	2990	2853	2592	3260	2943	3137	3237	2614	2739	-0.2161	0.159144	-0.33911	0.0497781	-0.124226	0.418112	-0.125658	0.816807	0.0778304	0.998294	-0.191356	0.419462	0.144929	0.689909	-0.147075	0.492967	-0.0380454	0.973556	-0.057205	0.928237	-0.222128	0.572159	-0.182916	0.606669	-0.367334	0.0391687	0.0233817	0.925088	0.202302	0.425814
FBgn0004449	CG5723	3L	12169	438	328	630	551	448	539	543	381	432	510	497	563	0.463015	0.0582081	0.248986	0.469696	-0.212659	0.431346	0.150413	0.867327	-0.229	0.840273	0.0985223	0.846934	-0.125136	0.885916	-0.114942	0.833939	0.0668044	0.964094	-0.0609166	0.957165	0.132942	0.970335	0.192	0.784225	0.330367	0.306703	-0.346246	0.234018	-0.0722624	0.916888
FBgn0004456	CG1771	X	5001	3775	3565	3779	3872	4542	4005	4001	3567	4158	3394	4112	3859	-0.072379	0.719229	0.109494	0.623278	0.18364	0.180247	-0.0362837	0.966157	0.0324635	0.998294	-0.127551	0.715718	-0.218925	0.62455	0.0773764	0.839035	-0.107332	0.845074	-0.0854254	0.913834	0.0402625	0.994746	0.111705	0.888513	0.00532033	0.990615	-0.0560996	0.876373	-0.146621	0.626925
FBgn0004463	CG8344	2R	3532	401	330	356	367	441	277	381	359	446	457	423	343	-0.1407	0.652843	-0.129023	0.761403	0.00887302	0.985197	-0.0554292	0.958323	0.070507	0.998294	0.108829	0.818184	0.204223	0.7961	0.0876041	0.909774	0.0638525	0.973819	0.159849	0.823641	0.0159517	0.996169	-0.142716	0.879442	-0.041262	0.938961	0.245379	0.471616	0.0661485	0.923128
FBgn0004465	CG4086	3L	1412	1146	1194	1127	1145	1326	1287	1156	1087	1231	1392	1250	1350	-0.172188	0.38542	0.0518892	0.853365	0.225759	0.149021	-0.132101	0.817163	0.0297408	0.998294	-0.0228181	0.957562	-0.0668819	0.919913	0.199999	0.373023	-0.0228848	0.984855	0.112755	0.84551	0.163778	0.835394	0.0419027	0.960599	0.0359329	0.924271	0.148571	0.532588	-0.190838	0.502527
FBgn0004507	CG7254	2L	3144	3553	3354	5209	5123	3917	3831	4672	4730	3646	4438	4691	5139	0.438698	0.000602817	0.0594557	0.808731	-0.379584	0.000657644	0.336166	0.137949	-0.07795	0.998294	0.0351507	0.918509	-0.0179625	0.978966	-0.0463864	0.923325	0.301628	0.112163	-0.304634	0.262436	0.0297948	0.994746	0.317733	0.211034	0.382503	0.0339528	-0.397145	0.00325451	0.290044	0.137208
FBgn0004509	CG10772	3R	6225	7885	7916	9543	8772	9188	8296	8681	7746	8508	7415	9532	9307	0.0770924	0.698868	0.0378973	0.879882	-0.0386445	0.840838	-0.0258669	0.976339	-0.0957241	0.99616	-0.160391	0.58253	-0.187092	0.643368	0.0603439	0.882229	0.0860874	0.881441	-0.127771	0.822463	0.153064	0.828244	0.266831	0.463035	0.135647	0.573422	-0.233409	0.300504	-0.0651323	0.860556
FBgn0004510	CG6338	3R	1858	111	107	139	148	195	144	140	129	198	287	158	132	0.236752	0.54933	0.476508	0.177316	0.238863	0.509325	0.170424	0.851418	-0.0290517	0.998294	0.778978	0.0606732	0.308427	0.654606	0.0273869	0.97691	-0.171828	0.863837	0.537912	0.312334	0.0573686	0.994746	-0.443241	0.453805	0.262591	0.578718	0.556217	0.160633	-0.269261	0.589385
FBgn0004512	CG3879	2R	4240	16267	16538	23403	25532	10605	10971	20100	18305	11438	12541	16555	17397	0.433877	0.00103786	-0.690642	7.17942e-06	-1.12776	8.3043e-24	0.133126	0.793208	-0.272311	0.179685	-0.621593	2.83999e-05	0.0706022	0.887201	-0.476456	1.47131e-05	0.589711	1.55626e-05	-0.744369	1.27967e-07	-0.192446	0.660601	0.534472	1.8774e-05	-0.06295	0.823015	-1.05729	2.00282e-26	0.818442	8.69466e-08
FBgn0004513	CG10181	3L	4135	2789	4993	2299	2074	1677	1404	2573	3259	2502	2870	2213	2086	-0.88337	0.00102272	-1.32423	1.33792e-06	-0.466966	0.000955381	-0.383647	0.428711	0.393647	0.095801	-0.642013	0.0622886	0.674303	0.000118132	-0.00123188	0.999467	0.423682	0.0194181	-0.202341	0.684577	-0.405929	0.150725	-0.242247	0.455566	-0.868509	0.00344739	0.235823	0.20694	0.886758	9.16146e-06
FBgn0004556	CG9680	3L	2209	137	70	124	104	119	86	111	118	179	194	129	122	0.00771153	0.989696	-0.101559	0.871802	-0.113193	0.816132	0.0441786	0.977386	0.0379135	0.998294	0.489699	0.372413	0.534735	0.304445	0.111146	0.900225	0.193481	0.844994	0.435124	0.479396	0.0734689	0.994746	-0.347125	0.608652	0.137051	0.837244	0.517696	0.217006	0.158896	0.812593
FBgn0004569	CG4531	3L	2822	49	106	59	53	122	181	46	76	82	105	111	126	-0.457972	0.384428	0.697093	0.140605	1.23243	0.000144814	-0.227878	0.824054	0.0797002	0.998294	0.0467013	0.95966	-0.471691	0.434979	0.684369	0.00910626	-0.249406	0.754174	0.268461	NA	0.550575	0.180196	0.235495	0.810912	0.380314	0.51604	0.449381	0.395535	-1.00143	0.00882216
FBgn0004573	CG12073	3R	4486	29	37	58	51	58	50	45	35	28	39	68	62	0.450899	0.382042	0.478111	0.371115	0.0111185	0.98619	0.10344	NA	-0.178736	0.990454	-0.0908636	0.91937	-0.328032	0.663257	0.151582	NA	0.148367	0.913364	-0.149061	NA	0.373234	0.618826	0.41117	0.537001	0.659762	0.17005	-0.406862	0.478481	-0.307044	0.65818
FBgn0004574	CG15811	3L	2638	3730	4172	3417	3591	3662	3718	3290	3578	3494	3327	3370	3409	-0.300199	0.0702842	-0.197561	0.383106	0.102939	0.552622	-0.259564	0.431893	0.021101	0.998294	-0.377012	0.10964	-0.174211	0.645871	-0.0237121	0.961278	-0.131055	0.771919	-0.100709	0.865549	-0.0462401	0.994746	0.0418137	0.955557	-0.323996	0.115122	-0.0822506	0.7488	-0.0794664	0.835099
FBgn0004583	CG4114	2L	6672	1140	1311	672	669	1288	833	906	1433	1028	714	1045	626	-0.969238	2.02701e-09	-0.305269	0.32382	0.6414	0.00269863	-0.119451	0.900985	0.618635	0.0103898	-0.591179	0.0853875	-0.259985	0.703702	0.252135	0.569268	-0.248623	0.733532	-0.390213	0.526164	-0.347224	0.635175	-0.0083018	0.997548	-0.598351	0.060444	0.29382	0.460752	0.152174	0.808298
FBgn0004587	CG10851	3R	3966	3677	2976	4325	4025	4088	3768	4006	3222	4040	4440	4206	4035	0.189018	0.369894	0.130116	0.614326	-0.0587724	0.746607	0.032299	0.975573	-0.136655	0.973119	0.156508	0.584489	0.0327082	0.954841	0.00397926	0.993378	0.0491663	0.958544	0.118816	0.832069	0.140421	0.913541	0.0163349	0.981893	0.188337	0.498615	-0.0280619	0.901615	-0.094079	0.816858
FBgn0004597	CG7281	3R	1142	333	429	473	421	506	476	408	418	518	580	543	459	0.0884464	0.816042	0.243514	0.435931	0.157539	0.51811	0.0264861	0.983624	-0.051415	0.998294	0.301791	0.44067	0.0735893	0.933377	0.15824	0.734096	0.010881	0.993982	0.267453	0.599727	0.208867	0.816923	-0.0598738	0.955397	0.256902	0.492368	0.223702	0.489657	-0.213971	0.527178
FBgn0004598	CG18734	X	5774	179	162	244	189	173	145	206	194	143	1440	164	241	0.19255	0.615468	-0.192707	0.615934	-0.38187	0.215693	0.121027	0.893992	-0.0448862	0.998294	0.463816	0.391854	0.285313	0.553595	-0.0508652	0.960197	0.237504	0.753837	0.268999	0.641981	-0.0104053	0.996482	-0.200209	0.707428	0.118207	0.829965	0.331479	0.471616	0.319249	0.422913
FBgn0004607	CG1449	4	11695	111	101	257	271	325	339	165	136	151	130	205	219	1.08865	8.05674e-06	1.4358	3.09043e-09	0.341591	0.153491	0.32469	0.56081	-0.560011	0.0248238	0.176596	0.778207	-0.988924	0.00120638	-0.236504	0.544873	-0.549053	0.0229566	-0.134124	0.905681	0.357077	0.486338	0.435426	0.453805	0.797403	0.00582406	-0.775876	0.0231742	-1.01632	2.57476e-05
FBgn0004611	CG4574	2L	7347	4027	3633	3821	3669	3417	3568	3821	3424	3253	3315	3557	3415	-0.162247	0.355751	-0.229153	0.282139	-0.0681299	0.731136	-0.150086	0.767326	0.00320149	0.998294	-0.390455	0.0560056	-0.154573	0.684086	-0.0757218	0.839359	-0.0200432	0.987361	-0.226003	0.513302	-0.0783615	0.978393	0.13317	0.768439	-0.240754	0.262298	-0.231386	0.157772	0.0685963	0.864614
FBgn0004620	CG6992	2L	3253	142	124	557	538	97	77	369	324	193	168	342	314	1.79914	2.30609e-20	-0.645698	0.063073	-2.45961	3.58115e-37	1.07641	2.79926e-06	-0.506768	0.0123834	0.211083	0.711	0.645289	0.162947	-0.61734	0.000309312	1.4652	5.55203e-13	-0.810952	0.0168073	-0.0913686	0.984211	0.667537	0.0563328	1.08959	8.09177e-06	-1.43469	2.97005e-09	1.80633	8.17492e-15
FBgn0004622	CG7887	3R	2880	134	136	101	97	66	71	129	137	72	59	71	47	-0.521084	0.111064	-0.96503	0.00301133	-0.430514	0.263909	-0.0821499	0.936881	0.316409	0.628048	-0.909827	0.0472922	-0.0699418	0.959662	-0.404419	0.287273	-0.130045	0.93676	-0.695536	NA	-0.760313	0.0142777	-0.0415295	0.977141	-1.09289	0.00164729	-0.425646	0.425992	0.829753	0.0117664
FBgn0004629	CG8050	3R	484	1754	1417	1313	1404	2246	1829	1469	1555	1844	1374	1259	1705	-0.342723	0.0780179	0.243581	0.337143	0.593523	2.16117e-05	-0.133559	0.835856	0.184825	0.738433	-0.137418	0.750157	-0.341242	0.44377	0.125372	0.816088	-0.400445	0.146461	-0.00115761	0.999109	-0.0516664	0.994746	-0.0571837	0.961648	-0.195976	0.596843	0.185053	0.618471	-0.385276	0.0723352
FBgn0004636	CG1956	3L	2872	4313	4792	4734	4400	5620	5439	4718	4634	5028	5249	4891	4746	-0.127228	0.537385	0.169491	0.443671	0.300104	0.0138805	-0.0417973	0.961036	0.0791998	0.998294	-0.0114157	0.977718	-0.172542	0.549693	0.0947265	0.760695	-0.202052	0.408705	0.033104	0.958292	0.0112368	0.996169	-0.0337226	0.960035	-0.0318847	0.93009	0.11762	0.530147	-0.213229	0.336664
FBgn0004638	CG6033	2R	2795	2077	2286	2387	2345	2190	2411	2377	2030	2242	2485	1983	2313	-0.0173417	0.949299	-0.0253974	0.939147	-0.0079418	0.977504	-0.0636653	0.932473	-0.045788	0.998294	-0.0697305	0.829813	-0.0377448	0.959201	-0.107332	0.781675	-0.106352	0.892185	-0.000949374	0.999109	-0.0595946	0.994439	-0.0731278	0.929098	-0.131522	0.678641	-0.0514375	0.828011	-0.0423543	0.934477
FBgn0004643	CG9900	X	2567	468	474	423	425	516	468	402	498	530	1050	541	493	-0.274181	0.224467	-0.0424016	0.89946	0.233224	0.273982	-0.126674	0.876579	0.110837	0.998294	0.457738	0.291808	0.438385	0.404543	0.26838	0.313553	0.0485116	0.973819	0.508198	0.348518	0.138835	0.956978	-0.367924	0.571214	0.0193247	0.968741	0.672211	0.0632184	-0.0968001	0.849503
FBgn0004647	CG3936	X	10150	51	42	67	69	56	43	67	55	43	291	50	70	0.338227	0.501448	-0.0153605	0.983627	-0.353067	0.451574	0.193561	0.854469	-0.0560553	0.998294	0.764191	0.184697	0.499113	0.355304	-0.0854169	0.930123	0.141462	0.924501	0.434243	0.519733	-0.0313899	0.996169	-0.347884	0.571214	0.19646	0.778295	0.481164	0.376101	0.251547	0.727075
FBgn0004648	CG4122	X	5904	2118	2266	2595	2616	1922	1668	2353	2559	2030	2476	2307	2098	0.111962	0.578539	-0.385446	0.0387708	-0.500868	3.06226e-05	0.073778	0.920243	-0.0297586	0.998294	-0.14495	0.61342	0.231246	0.503616	-0.203617	0.313321	0.255118	0.332084	-0.213772	0.5909	-0.16928	0.824182	0.0264379	0.975894	-0.10348	0.737069	-0.255147	0.156687	0.456316	0.0157716
FBgn0004652	CG14307	3R	8399	149	193	204	206	224	334	226	212	235	191	152	201	0.114705	0.791676	0.542424	0.14588	0.432874	0.187228	0.216633	0.773757	0.112415	0.998294	0.110796	0.865335	-0.317149	0.651749	-0.143004	0.841052	-0.469499	0.219866	-0.100039	0.930247	-0.260493	0.791115	-0.143898	0.905139	-0.0622127	0.9223	0.0108801	0.983071	-0.292302	0.564621
FBgn0004654	CG3724	X	1895	7194	7036	6562	6531	11654	9978	6361	7955	8819	7073	9585	7239	-0.249714	0.0675798	0.483975	0.00235921	0.738239	1.76719e-12	-0.064901	0.933803	0.156987	0.930009	-0.0162666	0.97252	-0.456671	0.0943129	0.337197	0.113954	-0.325085	0.281856	0.0492343	0.958292	0.165093	0.91707	0.110667	0.907791	0.121426	0.73574	0.224263	0.40842	-0.537515	0.0114088
FBgn0004655	CG3707	X	6939	981	959	1179	1162	1286	1295	1182	1058	1221	1981	1008	1192	0.133404	0.524728	0.298042	0.1479	0.166844	0.34491	0.112273	0.863785	-0.0107743	0.998294	0.475027	0.144346	0.187015	0.774633	-0.0603512	0.923325	-0.221915	0.54246	0.338743	0.508567	-0.0500879	0.994746	-0.375838	0.453805	0.0640859	0.859846	0.348508	0.268923	-0.175953	0.579493
FBgn0004656	CG2252	X	9949	4255	3765	4562	4351	5545	5104	4690	4201	4813	4919	4439	4120	0.0185571	0.943658	0.295336	0.113104	0.28045	0.0166755	0.0602852	0.929975	0.0436718	0.998294	0.091351	0.747456	-0.193382	0.497214	-0.0330417	0.949048	-0.307831	0.0944905	0.0286749	0.966749	-0.0774834	0.979419	-0.120137	0.80957	-0.0183778	0.964388	0.0761068	0.717604	-0.229602	0.318875
FBgn0004657	CG1560	X	4397	3903	4076	3363	3457	4437	3652	3562	3536	3530	3843	3081	3345	-0.353364	0.0121331	-0.087531	0.731893	0.265728	0.0646342	-0.233582	0.44267	0.101282	0.978847	-0.291004	0.163459	-0.193894	0.565712	-0.0593973	0.893582	-0.315687	0.141542	-0.0452309	0.938979	-0.160643	0.813534	-0.131854	0.763138	-0.412597	0.0223728	0.0600891	0.775238	-0.156645	0.604473
FBgn0004687	CG3201	X	1302	8967	8939	6299	6543	7792	7795	6935	7118	7365	7239	6783	6948	-0.602516	3.61343e-07	-0.297595	0.0888552	0.304389	0.0110729	-0.40245	0.0410514	0.168689	0.665558	-0.461288	0.0116252	-0.158887	0.639318	0.11354	0.630709	-0.188232	0.478503	-0.0415225	0.948074	-0.0602342	0.990325	-0.0318994	0.961648	-0.483198	0.00188019	0.134194	0.478481	-0.12416	0.679369
FBgn0004698	CG8153	2R	4683	1107	983	1230	1106	879	844	1346	1105	1088	1892	940	1085	0.0261866	0.932069	-0.370806	0.0696148	-0.398682	0.00920851	0.130101	0.847965	0.102627	0.998294	0.277278	0.488595	0.571062	0.10629	-0.16397	0.623585	0.192074	0.651059	0.135544	0.883391	-0.263626	0.606777	-0.374059	0.498534	-0.151537	0.630539	0.250139	0.513615	0.499758	0.019736
FBgn0004797	CG31991	2L	2337	864	780	1580	1619	1665	1348	1399	1233	1589	1228	1077	1503	0.803963	2.4886e-08	0.737506	7.07281e-05	-0.0597217	0.797241	0.537058	0.0122569	-0.204949	0.646249	0.547951	0.076398	-0.135796	0.868018	-0.243158	0.456758	-0.197995	0.751114	0.00598765	0.997616	-0.0497393	0.994746	-0.062723	0.956778	0.499256	0.0604013	-0.202773	0.551271	-0.161407	0.645837
FBgn0004811	CG10528	2L	1870	201	187	211	220	246	231	247	218	261	462	255	271	0.016745	0.969137	0.180098	0.605412	0.163892	0.599852	0.147728	0.858955	0.122895	0.998294	0.573096	0.193197	0.366315	0.548716	0.250251	0.494483	0.102378	0.932281	0.378774	0.562803	0.119553	0.974662	-0.259815	0.757806	0.300135	0.38388	0.538493	0.185885	-0.0139628	0.983764
FBgn0004828	CG8989	X	2114	10032	10483	12769	13019	12177	11484	12146	11541	12052	12351	12233	11784	0.191868	0.209971	0.0971264	0.657093	-0.0942856	0.508249	0.114725	0.829448	-0.066047	0.998294	0.0628217	0.821449	-0.0283218	0.959991	-0.0758629	0.809462	0.00440795	0.995323	-0.0545963	0.920598	-0.0101643	0.996169	0.0317698	0.961648	0.109548	0.678535	-0.125836	0.434497	0.0225706	0.957825
FBgn0004832	CG6358	X	1178	67	81	96	111	96	60	109	100	88	137	98	88	0.299902	0.505787	-0.0335062	0.960624	-0.326578	0.458608	0.29631	0.671345	0.0413743	0.998294	0.288847	0.649249	0.244076	0.793565	-0.0850613	0.929373	0.149243	0.909215	-0.00379123	0.999109	-0.137929	0.977672	-0.111742	0.935461	0.180131	0.763953	0.0407306	0.95218	0.368038	0.502527
FBgn0004837	CG3497	2L	2950	78	59	97	103	115	79	85	62	106	243	132	106	0.353043	0.421403	0.334187	0.490804	-0.0186059	0.97576	0.0121468	0.992503	-0.224764	0.930009	0.772183	0.142978	0.399895	0.561564	0.180733	0.787335	0.185888	0.857981	0.603105	0.311468	0.427277	0.423053	-0.229709	0.819541	0.574634	0.167774	0.468567	0.376356	-0.300173	0.626925
FBgn0004838	CG10377	2L	8240	22613	18887	22691	21598	21744	21789	22632	21425	20682	23537	21478	21534	-0.0380205	0.882802	-0.0332799	0.909016	0.00531743	0.980412	0.00383495	0.996321	0.0411016	0.998294	-0.0921619	0.741946	-0.0538412	0.916435	-0.01835	0.966812	-0.0335368	0.975089	-0.0940109	0.823624	-0.0610739	0.98682	0.0185981	0.975894	-0.0587	0.854551	-0.0536181	0.763747	0.0362213	0.92727
FBgn0004839	CG8967	2R	4769	70	93	242	279	227	166	209	219	153	151	208	202	1.38106	2.94977e-07	1.02938	0.0014506	-0.353203	0.232121	0.997649	0.000253389	-0.176476	0.971309	0.541592	0.295464	-0.309993	0.65151	-0.255128	0.505522	0.03763	0.983646	-0.448489	0.426036	-0.0750563	0.994439	0.341206	0.606669	1.06413	0.000436113	-0.681668	0.0488237	0.134577	0.81553
FBgn0004852	CG7978	3L	5320	881	684	1620	1652	2779	2272	1273	934	1436	1437	1249	2100	0.894666	2.23927e-07	1.51423	8.01901e-16	0.635935	1.09001e-06	0.347132	0.380554	-0.424043	0.0794885	0.644492	0.0124604	-0.812219	4.92709e-06	0.0418612	0.962149	-0.467155	0.146218	0.246517	0.639358	0.411796	0.38641	0.210723	0.798266	0.880026	0.00253017	-0.225925	0.284122	-1.08755	1.13457e-07
FBgn0004855	CG3284	3R	1035	204	206	274	287	280	245	263	224	257	312	259	284	0.298576	0.288736	0.233941	0.471871	-0.0648046	0.853273	0.136517	0.876004	-0.118486	0.998294	0.245198	0.593575	0.0305121	0.978966	-0.0200639	0.978776	0.0270795	0.988669	0.0953928	0.928237	0.102075	0.980843	-0.00529437	0.998527	0.268788	0.452285	-0.0294517	0.952607	-0.0783231	0.893504
FBgn0004856	CG8264	X	2403	985	980	1089	1050	986	941	1030	989	1006	1290	972	1035	-0.0114586	0.967216	-0.129941	0.597191	-0.118697	0.538843	-0.0403806	0.964331	-0.028128	0.998294	0.0302194	0.948571	0.154289	0.776359	-0.0633447	0.90903	0.0374777	0.976538	0.0704091	0.928237	-0.0359304	0.994746	-0.115649	0.879389	-0.0803699	0.806968	0.0434217	0.898936	0.0849737	0.826183
FBgn0004858	CG4220	2L	3326	172	132	95	92	156	99	127	131	77	113	110	137	-0.739467	0.019086	-0.324483	0.453774	0.40368	0.30028	-0.245572	0.730813	0.338558	0.541474	-0.665645	0.170813	-0.29177	0.723126	0.280162	0.551708	-0.0368713	0.986471	-0.357439	0.635529	-0.0683407	0.994746	0.247239	0.799709	-0.359974	0.407608	-0.0255805	0.970526	0.0397276	0.964444
FBgn0004859	CG2125	4	5191	2103	1924	2492	2209	3714	3521	3053	2411	3538	3312	3238	2946	0.0871412	0.707698	0.721003	2.99552e-06	0.637294	1.38032e-07	0.317727	0.322371	0.227403	0.679578	0.557073	0.00837217	-0.140056	0.748556	0.383921	0.0110104	-0.224326	0.39196	0.20716	0.675482	0.129146	0.94435	-0.0847996	0.912188	0.487318	0.00712343	0.47403	0.00793454	-0.364356	0.123156
FBgn0004860	CG3895	X	6020	141	143	199	196	310	230	169	148	214	363	171	155	0.314633	0.327808	0.753658	0.00761682	0.440109	0.0972373	0.0594336	0.96243	-0.194395	0.952902	0.66508	0.131075	0.00783139	0.993303	-0.193932	0.710289	-0.56971	0.0395913	0.529876	0.342982	0.00755963	0.996482	-0.482019	0.390022	0.0763833	0.885699	0.380209	0.406262	-0.662981	0.0231137
FBgn0004861	CG18412	X	6048	805	847	721	723	818	721	743	893	831	666	698	590	-0.318142	0.0867621	-0.20306	0.40429	0.115635	0.59283	-0.0847674	0.920243	0.195858	0.839335	-0.29059	0.425867	-0.0888311	0.92491	-0.123431	0.798719	-0.236483	0.545898	-0.185651	0.796197	-0.314875	0.486338	-0.131919	0.895656	-0.448169	0.055597	0.00996411	0.980862	0.105896	0.814727
FBgn0004864	CG1594	X	5055	1153	1163	1262	1192	1489	1349	1280	1222	1243	1710	1183	1284	-0.0494727	0.849929	0.180811	0.417671	0.23221	0.132461	0.0255276	0.977386	0.0716419	0.998294	0.145642	0.67259	-0.0225061	0.979848	0.0278795	0.961278	-0.199592	0.541449	0.115719	0.870483	-0.0466359	0.994746	-0.168672	0.803781	-0.0223202	0.958322	0.194787	0.497812	-0.152644	0.616424
FBgn0004867	CG5920	2L	1177	27799	27732	26802	28517	27351	26296	26064	24317	28452	26194	27580	28671	-0.137039	0.406127	-0.152106	0.435931	-0.0150124	0.941086	-0.208888	0.502763	-0.0770137	0.998294	-0.196616	0.423921	-0.0417873	0.94375	0.0445043	0.920753	0.047867	0.956629	0.0191636	0.980752	0.118588	0.907019	0.0879321	0.884449	-0.0929879	0.718553	-0.0606365	0.813359	-0.0672452	0.844153
FBgn0004868	CG4422	2L	2501	9412	9001	9745	9971	10848	10379	9453	9518	10019	10399	9622	10381	-0.0345337	0.872204	0.0975374	0.648141	0.133609	0.317719	-0.0369828	0.962998	-0.00330691	0.998294	-0.0350183	0.907322	-0.125326	0.699139	0.0412485	0.928203	-0.0966517	0.85515	0.00466458	0.997384	0.0413342	0.994746	0.0252798	0.970423	0.00544448	0.990434	0.00118718	0.995511	-0.135874	0.616806
FBgn0004870	CG9097	3L	5340	59	56	75	84	98	118	73	75	68	102	86	113	0.280199	0.564651	0.699903	0.0726633	0.409509	0.293816	0.190815	0.851418	-0.0295814	0.998294	0.249258	0.711962	-0.251498	0.781106	0.211021	0.734096	-0.0920271	0.958544	0.0505817	NA	0.256335	0.844692	0.150462	0.905139	0.559611	0.202672	0.0235812	0.972616	-0.438998	0.346815
FBgn0004875	CG10847	3L	8375	1105	988	1182	1100	1338	1192	1215	1164	1127	2024	1159	1118	-0.00849308	0.978454	0.161549	0.506089	0.172009	0.330213	0.0928899	0.891725	0.100035	0.998294	0.344388	0.37853	0.183958	0.807683	0.0183215	0.975036	-0.152993	0.737805	0.234896	0.735383	-0.085181	0.978322	-0.303147	0.634619	0.00811436	0.987147	0.346957	0.338168	-0.0629391	0.87639
FBgn0004876	CG6027	3R	6523	3619	4749	7394	7581	6992	8230	6288	5485	5432	6068	6396	7789	0.674493	0.000243692	0.721166	0.00179404	0.055964	0.824549	0.354039	0.29825	-0.268487	0.223081	0.252638	0.392071	-0.448243	0.0471828	-0.0511147	0.928489	-0.107973	0.899535	-0.128307	0.770118	0.208871	0.761781	0.330467	0.229552	0.60354	0.0116877	-0.42415	7.716e-05	-0.334537	0.197348
FBgn0004885	CG6863	3R	5368	87	50	62	54	77	81	88	56	53	47	49	52	-0.292874	0.593094	0.087229	0.892805	0.398459	0.353209	-0.00606645	0.996537	0.174274	0.992292	-0.389122	0.548222	-0.378634	0.600701	-0.0929209	NA	-0.401402	0.408705	-0.308364	NA	-0.299016	0.792559	0.027953	0.98768	-0.421101	0.463697	-0.151445	0.829589	-0.0917701	0.919886
FBgn0004888	CG1065	3L	1479	4816	5240	4766	4903	4915	4748	5046	4897	4934	5027	4459	4756	-0.187084	0.27986	-0.159361	0.464842	0.0278407	0.885156	-0.0925082	0.884852	0.0854654	0.997372	-0.191686	0.431474	-0.029122	0.960452	-0.0441815	0.925585	-0.0804859	0.896905	-0.0924806	0.850707	-0.130196	0.884331	-0.0530619	0.935461	-0.232657	0.303405	-0.0056082	0.979783	0.060422	0.865977
FBgn0004889	CG6235	3R	3856	4694	4956	6336	5913	6437	6200	6307	5670	6040	7353	6025	6366	0.204837	0.21124	0.27619	0.130467	0.0730454	0.667792	0.209232	0.557498	0.0174327	0.998294	0.271051	0.223443	0.00357143	0.993666	0.0373012	0.933362	-0.0430919	0.964094	0.0522708	0.934069	0.0165548	0.996169	-0.0477439	0.945222	0.238134	0.261389	0.0721993	0.746636	-0.0544734	0.888016
FBgn0004892	CG3242	2L	2611	84	103	147	149	182	133	146	132	159	139	111	195	0.468452	0.181281	0.57038	0.118961	0.102395	0.810527	0.365837	0.48776	-0.0272815	0.998294	0.375675	0.496405	-0.0974097	0.93923	0.0421978	0.968164	-0.0347872	0.988503	0.00323425	0.999109	0.0673373	0.994746	0.0481182	0.97464	0.486072	0.308659	-0.0267454	0.964314	-0.13424	0.832923
FBgn0004893	CG10021	2L	3630	5017	4422	6945	6728	5679	5351	6388	6471	5748	5670	5865	6612	0.392553	0.00566655	0.116367	0.610925	-0.27715	0.0141882	0.335636	0.162476	-0.0338628	0.998294	0.088018	0.764219	-0.0218351	0.972774	-0.10255	0.74962	0.148407	0.710049	-0.255566	0.394022	-0.0687787	0.984211	0.169425	0.684737	0.278594	0.204525	-0.29909	0.0435158	0.235542	0.256415
FBgn0004901	CG2867	3R	2105	838	809	441	395	415	267	611	585	580	678	410	329	-1.07094	5.30545e-11	-1.30036	1.71704e-08	-0.252809	0.421442	-0.491808	0.0275692	0.480254	0.0163636	-0.541118	0.0316758	0.645082	0.0653114	-0.12557	0.842004	0.080601	0.960529	-0.0280109	0.97766	-0.604354	0.0103135	-0.568738	0.08069	-1.19333	3.2196e-09	0.490923	0.0561487	0.760142	0.00364972
FBgn0004903	CG6354	3R	3101	450	378	462	489	485	482	402	437	392	617	473	516	0.0637309	0.853439	0.114351	0.724106	0.0516204	0.862912	-0.0538592	0.959682	-0.107228	0.998294	0.0765463	0.894413	-0.0215072	0.984397	0.0689279	0.920919	0.0123722	0.993685	0.121578	0.899384	0.175862	0.874707	0.029592	0.982027	0.134829	0.720794	0.0195494	0.969548	-0.171902	0.657441
FBgn0004907	CG17870	2R	3078	45497	41352	43214	43146	48984	48987	43996	41673	46406	45041	43756	48381	-0.138998	0.398395	0.0682117	0.778526	0.209038	0.0834669	-0.0952868	0.869553	0.0375281	0.998294	-0.104318	0.688968	-0.164186	0.608339	0.109884	0.671386	-0.0996982	0.860997	-0.00413809	0.997616	0.0677244	0.982745	0.0608912	0.92945	-0.0272976	0.939048	0.0348238	0.878903	-0.167551	0.512064
FBgn0004908	CG7435	3R	656	155	153	150	155	164	177	152	150	163	178	163	151	-0.135602	0.740441	0.040142	0.933262	0.175826	0.630319	-0.0897192	0.928661	0.0268946	0.998294	-0.0334957	0.963305	-0.0571874	0.962126	0.0483038	0.959493	-0.105397	0.944529	0.0537454	0.966749	0.0192362	0.996169	-0.0414794	0.975894	-0.0775641	0.882417	0.0887909	0.878903	-0.138813	0.812151
FBgn0004910	CG15855	3L	2777	5111	5786	7159	7030	9607	8934	7714	6178	7386	7139	7659	7675	0.239544	0.162629	0.641058	0.00010379	0.408576	5.75894e-05	0.235665	0.574373	0.0178371	0.998294	0.220299	0.391825	-0.401152	0.0295381	0.128805	0.514773	-0.27354	0.112522	-0.0302501	0.971829	0.0994989	0.974662	0.124365	0.791273	0.363847	0.064861	-0.0126455	0.960346	-0.376283	0.0869828
FBgn0004913	CG1119	3R	3274	644	638	832	755	802	656	743	797	844	1667	791	715	0.167722	0.468771	0.0732905	0.811146	-0.0933046	0.711497	0.163284	0.77383	0.00782572	0.998294	0.658599	0.0773588	0.528023	0.235393	-0.0463225	0.943783	0.0288947	0.984248	0.451662	0.405658	-0.0557108	0.994746	-0.470452	0.36801	0.112923	0.740268	0.494382	0.182908	0.098669	0.819126
FBgn0004914	CG9310	2L	3876	2036	1968	2169	2255	4246	3513	1995	2868	2987	2710	3260	2654	0.00983286	0.968698	0.821524	2.61213e-07	0.817628	1.22156e-11	0.169601	0.816581	0.149924	0.983842	0.311222	0.231067	-0.469127	0.0471856	0.39505	0.0238105	-0.356048	0.15572	0.110233	0.896905	0.197548	0.884816	0.0940273	0.917707	0.428571	0.0485645	0.304472	0.150218	-0.592646	0.0234778
FBgn0004915	CG5193	2L	1604	746	811	887	936	1020	888	824	764	973	1015	961	948	0.0897748	0.733665	0.17822	0.481155	0.0900054	0.68479	-0.0501173	0.956347	-0.12975	0.978811	0.15598	0.641139	-0.0126912	0.987043	0.0815679	0.865125	-0.0131424	0.993536	0.202505	0.671881	0.209928	0.702676	-0.00136006	0.999341	0.171409	0.563241	0.0714128	0.822138	-0.229821	0.41282
FBgn0004919	CG2679	2R	3725	612	588	1257	1276	253	279	1110	599	233	316	546	890	0.916621	2.61115e-10	-1.21467	2.44724e-09	-2.13823	6.3114e-47	0.323879	0.567369	-0.347954	0.48922	-1.19168	5.90552e-06	-0.0309354	0.979848	-0.613116	0.00651599	1.03606	9.00066e-06	-1.27346	3.26625e-05	-0.180378	0.947845	1.01024	0.000502752	0.130111	0.794446	-2.08176	3.87653e-29	1.4488	3.16439e-07
FBgn0004921	CG8261	2R	2554	7281	6709	8052	7773	9954	10234	7647	7090	8473	7924	8735	8789	0.0433605	0.844227	0.414755	0.0160977	0.375407	0.00156009	-0.00740565	0.991775	-0.0472501	0.998294	0.0456626	0.894413	-0.348808	0.132198	0.162308	0.33028	-0.207756	0.410307	0.0529728	0.935187	0.202459	0.596928	0.138877	0.766028	0.205379	0.330137	0.00541707	0.981889	-0.41834	0.0187263
FBgn0004924	CG6146	X	5325	3470	3291	3448	3363	3871	3583	3651	3539	3705	4629	3429	3420	-0.12076	0.502015	0.0337288	0.896765	0.155878	0.260208	0.00537997	0.994154	0.120207	0.930009	0.105965	0.708071	0.0758969	0.896576	0.0293786	0.951194	-0.129712	0.751114	0.0992798	0.858096	-0.0935668	0.958442	-0.203978	0.592849	-0.0921343	0.736401	0.227942	0.210141	-0.0287163	0.945464
FBgn0004926	CG4153	3L	1128	3979	3621	3104	3267	2600	2539	3040	2912	2787	2814	2659	2954	-0.379281	0.00819314	-0.651815	3.71041e-05	-0.275514	0.0343787	-0.402279	0.0549673	-0.0425999	0.998294	-0.599859	0.0010423	0.0467381	0.940815	-0.149151	0.55578	0.100482	0.87684	-0.176162	0.641981	-0.105742	0.951365	0.0540547	0.942032	-0.531239	0.00234703	-0.226807	0.202852	0.224487	0.327378
FBgn0004957	CG6205	X	2331	126	139	214	177	169	155	188	187	191	284	176	174	0.387236	0.240782	0.167694	0.682066	-0.222991	0.510388	0.334832	0.493952	-0.00593384	0.998294	0.524958	0.257551	0.334963	0.608339	-0.102991	0.900454	0.0740336	0.963692	0.170201	0.861514	-0.103292	0.982707	-0.253082	0.766028	0.257555	0.55264	0.175884	0.745198	0.210414	0.660088
FBgn0005198	CG6975	3L	5795	1124	1156	1425	1333	1665	1520	1325	1371	1501	1542	1544	1432	0.136336	0.517519	0.364548	0.0509312	0.230534	0.127996	0.1448	0.794234	0.0174368	0.998294	0.219638	0.422669	-0.129524	0.786321	0.122184	0.719314	-0.104244	0.874392	0.0679959	0.920283	0.100239	0.970023	0.0224773	0.981447	0.259677	0.26635	0.0889884	0.744441	-0.208683	0.423153
FBgn0005278	CG2674	2L	2429	3118	3052	2956	2984	3144	2611	3294	2899	3527	3641	3019	2738	-0.18509	0.246354	-0.203826	0.340723	-0.0196263	0.934723	-0.0721689	0.918598	0.100878	0.992359	0.0299354	0.932822	0.228684	0.47495	-0.0203853	0.96896	-0.0120576	0.99366	0.103591	0.84551	-0.121615	0.931603	-0.239781	0.4705	-0.206348	0.378781	0.215944	0.186103	0.124184	0.728409
FBgn0005322	CG5395	2L	1719	1520	1713	1644	1622	1541	1640	1556	1539	1621	1689	1654	1805	-0.116926	0.609307	-0.122816	0.651208	-0.00643647	0.980838	-0.133366	0.82206	-0.023332	0.998294	-0.144897	0.637195	-0.018248	0.980394	0.0979173	0.789486	0.0911679	0.907426	-0.00401714	0.997616	0.11691	0.931343	0.11008	0.853628	-0.0170718	0.969359	-0.029035	0.918102	-0.0194207	0.970177
FBgn0005355	CG6054	3R	1596	354	380	400	391	433	402	368	427	460	500	394	347	-0.0254968	0.945434	0.0754561	0.822602	0.102074	0.706495	0.0278549	0.980573	0.0487179	0.998294	0.181642	0.652041	0.108087	0.896576	-0.0599112	0.932848	-0.160743	0.821607	0.143181	0.858262	-0.109972	0.978322	-0.257641	0.676197	-0.0941895	0.82189	0.208306	0.534839	-0.0442492	0.941859
FBgn0005386	CG8887	3L	7615	660	524	907	848	909	788	875	641	894	1418	743	805	0.41621	0.0466602	0.394221	0.102647	-0.0209928	0.940193	0.228825	0.708507	-0.128559	0.998294	0.685306	0.0318761	0.301487	0.548353	-0.142775	0.685094	-0.13247	0.837524	0.402844	0.436857	0.000164795	0.999771	-0.406944	0.383917	0.258601	0.390666	0.298976	0.380531	-0.13002	0.788007
FBgn0005391	CG2979	X	1616	2701	1438	9656	2615	4918	8140	3042	1558	1718	2602	2718	4786	0.604644	0.297797	1.07758	0.0364807	0.0543385	0.948426	0.0286902	0.987754	-0.179092	0.855672	-0.113331	0.840416	-1.33405	2.5269e-07	-0.111947	0.856741	-0.320725	0.605595	-0.150759	0.883038	0.241695	0.872287	0.631907	0.083537	0.478835	0.461472	-0.568285	0.258206	-0.86863	0.0838975
FBgn0005411	CG9998	X	1527	1351	1244	1647	1870	1534	1357	1672	1307	1632	2022	1487	1741	0.296117	0.103159	0.0472791	0.866724	-0.249126	0.134339	0.101634	0.892983	-0.157779	0.963419	0.287677	0.27466	0.238157	0.510131	-0.0908086	0.86153	0.128408	0.843249	0.169078	0.769603	0.0724677	0.994439	-0.104878	0.888513	0.192437	0.49439	-0.00013901	0.999633	0.0614194	0.904157
FBgn0005427	CG3114	X	4807	1070	779	1401	1393	1260	1209	1362	943	1213	1422	1176	1409	0.441733	0.0417993	0.298305	0.275303	-0.146182	0.393522	0.191875	0.801812	-0.179781	0.948017	0.298257	0.373163	0.0140203	0.984923	-0.0807245	0.88009	0.0429977	0.975089	0.077557	0.9309	0.108482	0.979419	0.0279869	0.976488	0.346176	0.253494	-0.13203	0.581204	-0.0734602	0.898929
FBgn0005533	CG3922	3L	535	16374	13502	16911	18055	15166	14984	16609	11822	16057	14942	15992	17174	0.0918185	0.69374	-0.0876455	0.741813	-0.1811	0.180145	-0.133853	0.863785	-0.204078	0.840273	-0.121052	0.688968	-0.0300222	0.962571	-0.050739	0.913946	0.111456	0.822349	0.0261789	0.979883	0.161931	0.90911	0.139704	0.766028	0.036695	0.921986	-0.211812	0.263261	-0.0615198	0.911801
FBgn0005536	CG32156	3L	5686	1219	1316	1253	1266	1349	1312	1265	1254	1184	1443	1127	1293	-0.13982	0.514171	-0.0348244	0.906499	0.106019	0.571098	-0.0845942	0.904221	0.0469474	0.998294	-0.132385	0.67848	-0.0905304	0.888287	-0.0321431	0.959493	-0.13984	0.805143	-0.0417031	0.958292	-0.0799174	0.982659	-0.0512555	0.954428	-0.173823	0.561454	0.00578802	0.983091	-0.0554465	0.893504
FBgn0005564	CG9262	3L	4097	42	44	33	36	23	30	36	37	27	22	37	34	-0.343381	0.541152	-0.607248	0.260465	-0.242075	0.699585	-0.184606	NA	0.0537135	0.998294	-0.522839	0.403979	-0.0572458	0.963424	0.0272962	NA	0.170578	0.89097	-0.249723	NA	-0.0349511	0.996169	0.177644	0.858957	-0.290759	0.663073	-0.237868	0.71706	0.321646	0.673618
FBgn0005585	CG9429	3R	1677	16930	18824	18436	19831	15295	14482	15948	23197	15396	15189	17648	17509	-0.0360019	0.886566	-0.361052	0.0425553	-0.328118	0.00371597	0.0416902	0.970836	0.0685684	0.998294	-0.394156	0.0529923	-0.0327345	0.954841	-0.0943463	0.739801	0.209802	0.322218	-0.400047	0.317387	-0.153897	0.932372	0.242123	0.345328	-0.134659	0.613695	-0.360926	0.00788301	0.385704	0.204427
FBgn0005592	CG32134	3L	3905	112	103	89	110	56	64	111	126	74	87	52	113	-0.21485	0.635084	-0.823718	0.0240306	-0.588103	0.117604	0.0445064	0.974537	0.189911	0.978811	-0.454267	0.403305	0.184252	0.872401	-0.118893	0.901109	0.210415	0.844994	-0.425642	NA	-0.298363	0.795393	0.0381835	0.981622	-0.385212	0.50598	-0.24883	0.672852	0.830471	0.018349
FBgn0005593	CG4897	2L	1167	24843	25043	26134	26214	24290	23421	24773	24591	24635	24403	25374	26161	-0.0636649	0.734616	-0.16627	0.391212	-0.103236	0.454222	-0.0919362	0.871938	-0.0306464	0.998294	-0.202099	0.350684	-0.032358	0.954841	0.000228825	0.999971	0.0882236	0.867901	-0.103588	0.812961	0.0285619	0.994746	0.120121	0.768439	-0.0654975	0.810865	-0.138653	0.404418	0.068412	0.837305
FBgn0005596	CG14513	3R	4239	258	225	264	296	290	273	267	231	329	1018	285	325	0.0751713	0.849929	0.109039	0.766108	0.0341046	0.928287	-0.0325767	0.978981	-0.0909726	0.998294	0.925872	0.0463094	0.673627	0.15839	0.118499	0.855988	0.0818453	0.954029	0.773945	0.101106	0.212524	0.837839	-0.5425	0.329557	0.20663	0.594177	0.794275	0.0692938	-0.143017	0.768214
FBgn0005612	CG3090	2R	3579	1419	1680	1485	1667	1442	1914	1433	1365	1218	1329	1174	1712	-0.106633	0.693303	0.0151677	0.972174	0.120458	0.693023	-0.207868	0.650942	-0.106805	0.992359	-0.444191	0.0796949	-0.415628	0.255937	-0.0864044	0.913946	-0.188086	0.823633	-0.220395	0.568136	0.00998891	0.996482	0.194445	0.792024	-0.201824	0.611883	-0.341921	0.0849559	-0.229213	0.566955
FBgn0005616	CG3241	2L	3843	641	588	677	692	762	726	699	571	719	707	696	668	0.021336	0.947032	0.164474	0.524353	0.144727	0.480475	-0.0320395	0.976339	-0.0479424	0.998294	0.0289305	0.955365	-0.119931	0.866385	0.0159417	0.978776	-0.127897	0.844994	0.059921	0.948242	0.0624227	0.994439	-0.00748627	0.995667	0.0353095	0.93196	0.0103869	0.977181	-0.195313	0.589385
FBgn0005617	CG10385	2L	5021	756	837	1050	980	977	1002	1011	976	951	1729	1003	1114	0.207444	0.338914	0.200516	0.431661	-0.00596515	0.983719	0.211072	0.626176	0.0186883	0.998294	0.480328	0.204361	0.275188	0.645871	0.0754638	0.8865	0.0700872	0.94921	0.253085	0.707788	0.0535632	0.994746	-0.201989	0.813397	0.281129	0.277561	0.287775	0.466079	0.0245897	0.962065
FBgn0005624	CG3886	2R	6332	105	137	205	137	90	94	111	192	82	186	183	214	0.314454	0.465737	-0.44326	0.274115	-0.749974	0.0198294	0.163706	0.884353	-0.0636067	0.998294	-0.0444825	0.960005	0.232188	0.811906	0.162439	0.820378	0.801928	0.00138324	-0.161926	0.892325	0.229831	0.885861	0.331937	0.679001	0.527211	0.143517	-0.270574	0.655428	0.597025	0.16936
FBgn0005631	CG13521	2R	6698	377	227	510	527	627	541	450	371	513	482	612	592	0.591354	0.0420123	0.776349	0.00834499	0.191288	0.377858	0.279749	0.660911	-0.234285	0.722315	0.457582	0.29658	-0.25861	0.609746	0.211396	0.458562	0.0253486	0.986464	0.151316	0.84969	0.443426	0.105983	0.276776	0.594674	0.794101	0.0068711	-0.0962113	0.812535	-0.452762	0.0743212
FBgn0005632	CG1945	3R	9837	9318	7881	9088	8394	9680	9108	9353	8369	8889	9426	8906	8330	-0.106617	0.625719	0.0218503	0.940594	0.130549	0.370464	-0.035874	0.968984	0.0647545	0.998294	-0.0907366	0.747815	-0.107341	0.757673	0.00267926	0.996745	-0.131747	0.750269	-0.0507116	0.93047	-0.0643664	0.993484	-0.0282754	0.967033	-0.105329	0.724993	0.0169201	0.939535	-0.0606389	0.869593
FBgn0005636	CG3385	2R	3426	732	810	585	607	895	717	776	906	941	833	757	766	-0.48745	0.00826147	-0.0446871	0.895801	0.44377	0.0114306	0.0373643	0.970836	0.464531	0.0229548	0.0193569	0.970562	0.0618955	0.943091	0.338552	0.0638916	-0.0842471	0.937036	-0.0176845	0.988984	-0.152534	0.908345	-0.143418	0.850888	-0.126629	0.701589	0.484673	0.0590889	0.0823618	0.866662
FBgn0005640	CG10579	3L	4914	3053	2954	3390	3394	2608	2938	3515	3497	2755	3190	3071	3470	0.0407575	0.856785	-0.209429	0.380978	-0.25074	0.142071	0.130154	0.799609	0.0922555	0.992292	-0.196584	0.400836	0.0171106	0.981659	-0.0280448	0.959493	0.192854	0.655436	-0.323219	0.186998	-0.120071	0.922167	0.1821	0.657821	0.00847927	0.985766	-0.236919	0.126877	0.33894	0.140295
FBgn0005642	CG1454	3R	3184	644	687	738	786	740	828	723	736	716	1062	627	849	0.0587096	0.843189	0.128144	0.669457	0.0706459	0.797962	0.0438969	0.962998	-0.00950052	0.998294	0.200138	0.613273	0.0774612	0.938091	-0.0202389	0.977541	-0.0894078	0.947161	0.147754	0.84551	-0.0130049	0.996169	-0.157124	0.866183	0.0315857	0.955749	0.145579	0.710795	-0.0805414	0.864
FBgn0005648	CG2163	2R	1869	789	730	620	711	853	790	706	785	806	922	1097	666	-0.311709	0.132269	0.00690377	0.983897	0.320718	0.0767535	-0.097105	0.894955	0.182045	0.881106	-0.00210025	0.996843	-0.00401775	0.99441	0.316077	0.40325	0.065862	0.972785	0.0965899	0.896865	0.156272	0.957891	0.0674749	0.955883	0.092256	0.859258	0.301501	0.252423	-0.11084	0.78497
FBgn0005649	CG5422	3R	3370	3799	3204	3460	3444	3951	3777	3341	3792	3867	5183	3828	3645	-0.149377	0.463297	0.0364007	0.900238	0.188613	0.14982	-0.0488639	0.957938	0.0894667	0.998294	0.16748	0.586812	0.133699	0.786916	0.129656	0.580423	-0.061033	0.944592	0.212001	0.641981	0.031683	0.994746	-0.190738	0.69731	-0.0180855	0.966292	0.318196	0.10249	-0.0890528	0.814727
FBgn0005666	CG32019	4	27666	652	546	700	734	888	874	739	650	714	558	485	672	0.121482	0.656192	0.434588	0.0478359	0.317293	0.0544971	0.115005	0.883261	0.00463071	0.998294	-0.0790483	0.881133	-0.450309	0.246875	-0.235714	0.525638	-0.518771	0.0336288	-0.181797	0.806183	-0.238496	0.792559	-0.0667208	0.956497	-0.150674	0.724328	-0.188589	0.636212	-0.30603	0.227721
FBgn0005671	CG17369	3R	2722	85733	103830	100605	96024	109345	109944	97506	101498	107411	100605	101723	97282	-0.0804562	0.752523	0.100755	0.713975	0.184806	0.155144	-0.0129284	0.989825	0.064682	0.998294	-0.0470068	0.901543	-0.140119	0.716932	0.038588	0.928203	-0.148	0.677561	-0.0320292	0.963949	-0.0290685	0.994746	-0.00935279	0.992539	-0.0436498	0.907394	0.0345812	0.890658	-0.115173	0.705738
FBgn0005672	CG10334	2L	1653	998	605	946	918	919	1006	1162	591	949	1054	777	1138	0.08045	0.852082	0.152292	0.704879	0.0759332	0.763579	0.0317352	0.983784	-0.0254839	0.998294	0.121334	0.806271	-0.0200795	0.980585	0.0491603	0.952276	-0.0234038	0.992004	0.070432	0.954864	0.0641268	0.994746	-0.00647785	0.99758	0.128927	0.810865	0.049714	0.876373	-0.10291	0.888047
FBgn0005674	CG5394	3R	5405	2766	3143	2962	2911	3025	2797	2751	3017	2975	2973	3068	2874	-0.140105	0.50543	-0.125063	0.610379	0.0153546	0.942659	-0.106893	0.877857	0.0239675	0.998294	-0.167565	0.552242	-0.0396157	0.947945	0.037563	0.938981	0.0121525	0.993536	-0.0522285	0.938979	0.0101308	0.996169	0.0504468	0.945222	-0.102754	0.744818	-0.0287696	0.911729	0.00928264	0.98492
FBgn0005677	CG4952	2L	4982	58	60	91	95	115	71	70	95	96	41	109	63	0.445069	0.282518	0.457064	0.332733	0.0170946	0.978326	0.266743	0.748701	-0.0682132	0.998294	0.0319304	0.975103	-0.202272	0.846623	-0.0479066	0.964062	-0.0646054	0.976538	-0.152492	NA	0.0158067	0.996169	0.125084	0.928371	0.336442	0.575162	-0.247443	0.706259	-0.111233	0.897501
FBgn0005694	CG5683	3L	3826	1119	1171	1200	1123	1266	1114	1175	1197	1187	1657	1221	1032	-0.110739	0.62685	-0.0508738	0.858601	0.0606059	0.786417	-0.0297393	0.974537	0.0735953	0.998294	0.108993	0.77292	0.154561	0.796824	-0.0182682	0.977541	-0.0831284	0.937506	0.134423	0.839847	-0.0921028	0.978322	-0.226604	0.713617	-0.131058	0.693009	0.216542	0.462232	0.0180716	0.97168
FBgn0005695	CG8411	2R	2506	833	833	723	783	823	1055	722	835	889	1549	795	1017	-0.270681	0.164633	0.0701694	0.850345	0.3354	0.157218	-0.160002	0.79483	0.0853159	0.998294	0.30877	0.438461	0.218969	0.763665	0.246902	0.419013	-0.0614532	0.972172	0.426186	0.406029	0.154783	0.925014	-0.267119	0.716088	0.00622515	0.991398	0.545328	0.0891726	-0.233159	0.575866
FBgn0005771	CG4491	2L	2859	981	604	1533	1417	2296	1475	1517	1070	1878	1710	1945	1909	0.710561	0.00425278	1.03887	0.000272932	0.353592	0.133579	0.488951	0.207185	-0.110842	0.998294	0.88988	0.00340552	-0.113464	0.896576	0.379399	0.00580725	0.0189646	0.993536	0.323237	0.516746	0.45181	0.130115	0.140213	0.817248	1.07166	1.56758e-05	0.224085	0.382495	-0.46002	0.173949
FBgn0005777	CG8402	3R	2509	1658	1925	1680	1753	1773	1715	1539	1808	1732	2118	1945	1810	-0.190648	0.370922	-0.140402	0.585234	0.051016	0.802203	-0.160359	0.801812	0.0140836	0.998294	-0.0835755	0.815071	0.0577442	0.932969	0.141199	0.611553	0.0818333	0.916689	0.085703	0.903969	0.117698	0.957537	0.0233275	0.980357	-0.0454783	0.905318	0.106181	0.674391	-0.0351729	0.945396
FBgn0008635	CG6223	X	3203	4043	4562	3592	3711	3648	3719	3298	3747	3460	3556	3687	3683	-0.36209	0.0232423	-0.319032	0.115968	0.042236	0.836148	-0.334727	0.257449	0.000657381	0.999767	-0.460299	0.0260844	-0.137866	0.723126	0.0341482	0.940246	-0.0168141	0.990136	-0.0999028	0.862499	0.0297261	0.995514	0.119793	0.795005	-0.326121	0.115705	-0.103913	0.59942	-0.0414723	0.929043
FBgn0010015	CG1455	3R	3064	30	28	65	39	159	216	33	32	100	79	226	200	0.515646	0.330042	2.20742	2.95494e-11	1.56547	8.80953e-07	0.0424054	NA	-0.242699	0.884407	0.908994	0.0828796	-0.705101	0.115825	1.26037	1.08851e-08	0.116319	0.937036	0.690303	NA	1.80569	8.31722e-16	0.805619	0.0243402	2.34	1.10413e-15	0.431875	0.443207	-2.02183	2.93201e-11
FBgn0010019	CG3972	X	2279	1070	280	1989	185	2337	552	99	155	469	187	1618	666	0.116925	0.861354	0.343785	0.620172	0.0801297	0.898705	-0.533149	0.162704	-0.158485	0.682035	-0.3904	0.531187	-0.389924	0.422899	0.00711287	0.987984	-0.0484256	0.975089	0.677973	0.210397	0.830216	0.00257711	0.389184	0.453805	0.233857	0.766201	-0.266471	0.543757	-1.09579	0.013766
FBgn0010038	CG4181	3R	734	528	545	100	196	37	34	86	126	57	50	79	71	-1.75026	5.42529e-10	-3.69504	3.36953e-53	-1.58204	8.46917e-06	-1.94252	1.05456e-18	-0.202896	0.973119	-3.01668	2.34507e-28	0.22565	0.816108	-0.496342	0.129684	0.597682	0.0916853	-0.597121	NA	-0.330314	0.705115	0.253138	0.793259	-2.71385	2.78947e-36	-0.912566	0.0381471	1.23683	0.000558041
FBgn0010041	CG12242	3R	840	400	571	441	584	1130	776	226	383	720	570	895	1116	-0.0533039	0.910572	0.791506	0.00467592	0.853575	0.000107052	-0.550476	0.16911	-0.439263	0.243544	0.199081	0.681016	-0.501137	0.220018	0.805907	1.69025e-05	0.0541385	0.975089	0.714476	0.0949643	1.20385	3.36729e-07	0.546433	0.122804	0.850687	0.00134888	0.248476	0.553351	-1.38579	7.36662e-07
FBgn0010051	CG1063	3R	10304	2016	1850	2235	2170	2093	2084	2119	1885	1962	1849	2052	1920	0.0534566	0.820061	0.00719632	0.981651	-0.045834	0.822092	-0.029877	0.974537	-0.0777284	0.998294	-0.192266	0.500937	-0.188788	0.640214	-0.11754	0.699689	-0.083131	0.912831	-0.154261	0.766806	-0.0378649	0.994746	0.102964	0.881763	-0.0715711	0.820444	-0.243688	0.255645	-0.0392327	0.930798
FBgn0010053	CG15101	2R	1486	2561	4102	6746	8033	2020	2156	4414	3728	2257	2112	3466	3951	0.937224	9.47338e-05	-0.724354	0.00867617	-1.73788	1.88606e-37	0.162725	0.848308	-0.698044	8.17665e-06	-0.712563	0.0215788	-0.00794759	0.989259	-0.876574	4.194e-11	0.728947	3.03968e-06	-0.909325	1.33412e-06	-0.146563	0.903464	0.739043	3.07991e-05	0.0328554	0.958754	-1.7139	1.9699e-30	0.931721	9.32972e-08
FBgn0010078	CG3661	2R	542	20760	16291	23640	24108	17684	18568	21849	15775	19733	19066	19992	22039	0.22638	0.260882	-0.12816	0.642167	-0.359373	0.00341893	-0.05256	0.961861	-0.24421	0.650897	-0.109032	0.733094	0.0220679	0.974216	-0.152782	0.444201	0.178085	0.607405	-0.046726	0.957489	0.109729	0.977672	0.158403	0.694671	0.0666146	0.852908	-0.337137	0.0139556	0.0660981	0.903454
FBgn0010100	CG9244	2L	3102	45351	51886	58162	54452	44616	47195	52714	54117	45103	46991	53919	52849	0.0744877	0.748694	-0.181053	0.445922	-0.257838	0.0620514	0.0472343	0.953935	-0.0221184	0.998294	-0.255253	0.258409	-0.0690435	0.895314	-0.0512427	0.898002	0.1835	0.547786	-0.301369	0.155448	-0.0300054	0.994746	0.258213	0.178456	0.0188957	0.963627	-0.332936	0.00301705	0.228893	0.335754
FBgn0010105	CG17943	3L	2495	100	131	72	54	54	48	62	101	59	52	53	64	-0.852626	0.0184439	-1.11055	0.00191366	-0.22274	0.677918	-0.386178	0.517702	0.199547	0.978811	-0.87822	0.0725782	0.0252168	0.984944	-0.0442357	NA	0.102644	0.956629	-0.331748	NA	-0.282941	0.817915	0.0561464	0.970423	-0.911047	0.0137462	-0.134402	0.851693	0.533509	0.300045
FBgn0010113	CG15532	3R	14807	488	337	831	758	926	919	670	552	575	1267	575	1029	0.762558	0.000838529	0.995818	2.11551e-05	0.238154	0.1895	0.398941	0.309068	-0.274192	0.486322	0.770478	0.0673184	-0.0735623	0.948765	0.0248433	0.977541	-0.162981	0.877291	0.338992	0.628688	0.25393	0.824182	-0.0740602	0.956838	0.732351	0.0358697	0.111633	0.847472	-0.5407	0.0130891
FBgn0010173	CG9633	3R	2135	1486	1546	1704	1630	1045	1009	1622	1575	1305	2371	1632	1520	0.00239048	0.992057	-0.648109	0.000134824	-0.65477	1.38697e-07	-0.00663585	0.993801	-0.00784065	0.998294	0.0656943	0.903355	0.604736	0.0839372	-0.0534224	0.921909	0.547261	0.000592098	0.0680548	0.948302	-0.0465964	0.994746	-0.114194	0.92543	-0.0561169	0.865092	0.0640733	0.894732	0.632838	0.000138737
FBgn0010198	CG2033	X	877	17199	16395	21257	21587	15921	15341	18998	15742	17278	16901	18910	19631	0.213458	0.124053	-0.204491	0.268245	-0.419792	2.64626e-05	-0.0326131	0.970836	-0.224524	0.512019	-0.152977	0.518846	0.05285	0.925378	-0.124324	0.525638	0.267693	0.125489	-0.112679	0.83472	0.107202	0.958442	0.215122	0.453805	0.0820972	0.756805	-0.363998	0.00454982	0.164953	0.596771
FBgn0010213	CG8905	2R	1015	4151	4456	3207	3254	2399	2621	3585	3806	3144	3262	2872	3135	-0.536322	6.96785e-05	-0.852277	7.13689e-07	-0.323762	0.0306649	-0.278181	0.330175	0.22569	0.368505	-0.588984	0.00109836	0.254513	0.418138	-0.077412	0.842665	0.215296	0.522293	-0.289252	0.308631	-0.301321	0.240147	-0.0340306	0.961648	-0.611269	0.000309931	-0.0599658	0.788557	0.550017	0.00339028
FBgn0010215	CG17947	3L	3487	2367	2460	2573	2597	2505	2363	2560	2309	2533	3054	2450	2459	-0.0346381	0.884719	-0.0917921	0.698365	-0.0572175	0.755763	-0.0658044	0.923491	-0.0318506	0.998294	0.0192697	0.95966	0.11202	0.81298	-0.0489076	0.919173	-0.00456624	0.995323	0.0867745	0.887911	-0.0173139	0.996169	-0.116239	0.831251	-0.087203	0.764755	0.0558413	0.822909	0.0208609	0.965042
FBgn0010217	CG11154	4	2048	93735	104338	81094	79149	75279	77770	82213	84727	81521	83004	79225	80943	-0.43111	0.00204658	-0.463037	0.00935136	-0.034695	0.860759	-0.30405	0.254614	0.103892	0.969207	-0.437473	0.0196979	0.0271161	0.962503	0.0213244	0.96055	0.043299	0.964454	-0.115946	0.767268	-0.0849473	0.970023	0.0164931	0.981031	-0.407535	0.0237431	-0.0102521	0.960226	0.140113	0.63088
FBgn0010220	CG12759	2R	1670	285	324	299	311	428	303	371	313	394	399	359	375	-0.12495	0.708847	0.139944	0.71077	0.265064	0.353209	0.0696994	0.940249	0.172092	0.963419	0.174021	0.693322	0.0392492	0.972774	0.245098	0.443469	-0.00440532	0.995599	0.0950094	0.920283	0.0594112	0.994746	-0.0454389	0.969331	0.143836	0.716809	0.293687	0.401446	-0.0621226	0.923593
FBgn0010222	CG18466	3R	1257	271	445	165	187	86	84	170	215	102	95	120	130	-1.03008	0.00050004	-1.9349	8.97165e-11	-0.916254	0.00071127	-0.722277	0.0304116	0.126907	0.998294	-1.62668	4.75761e-06	0.0845691	0.944958	-0.343289	0.334966	0.378001	0.402211	-0.734103	0.0989144	-0.481752	0.2064	0.238438	0.806251	-1.41366	2.34462e-06	-0.677241	0.0912507	1.03838	0.000381003
FBgn0010223	CG12232	3L	1825	1278	1483	2095	2353	1338	1656	1809	1310	1105	1240	1680	2027	0.533585	0.00228359	0.0156017	0.968887	-0.513024	0.00647358	0.0762529	0.931905	-0.373525	0.196718	-0.400406	0.12474	-0.383131	0.276925	-0.214782	0.428267	0.239654	0.605741	-0.448408	0.213271	0.179553	0.899306	0.640183	0.00170323	0.292829	0.287521	-0.933262	1.87854e-10	0.0660715	0.918338
FBgn0010225	CG1106	3R	3030	2209	2305	7429	7221	6622	6244	4782	4402	4798	4235	6496	6885	1.53217	1.63716e-39	1.37066	1.92095e-22	-0.156398	0.228164	0.867047	6.00929e-08	-0.573624	1.96027e-06	0.77704	0.000136825	-0.535076	0.00822234	-0.102568	0.695693	0.0369453	0.973373	-0.109319	0.85871	0.470484	0.00483683	0.561007	0.0040363	1.40641	6.37777e-23	-0.708197	5.55386e-06	-0.448818	0.00650149
FBgn0010226	CG8938	2R	1764	1840	1009	100	60	49	62	571	620	554	766	58	104	-3.71497	5.78825e-41	-4.22004	3.2489e-50	-0.386901	0.431657	-1.03289	9.8914e-05	2.00143	1.25732e-27	-1.11677	0.000579689	2.5984	3.91006e-26	0.0185281	0.982578	0.26753	0.745701	0.0324152	0.977575	-2.04742	1.94961e-21	-1.89608	1.44026e-13	-3.55558	2.53097e-34	2.37105	2.69996e-17	3.07206	1.87943e-42
FBgn0010228	CG17921	2R	1188	2745	2097	2128	2166	2349	2224	2262	2493	2558	2235	2870	2620	-0.29374	0.163258	-0.17922	0.510379	0.117377	0.46409	-0.0936994	0.906194	0.179669	0.738791	-0.178576	0.617366	-0.00135006	0.998188	0.351033	0.0122995	0.227145	0.392568	-0.0764232	0.920283	0.15752	0.862266	0.219585	0.655874	0.0659881	0.864667	0.1086	0.72143	0.0756105	0.845426
FBgn0010235	CG5433	3L	1876	1772	1815	2387	2280	2538	2435	2112	2075	2233	2511	2218	2317	0.239715	0.138873	0.356019	0.045308	0.11853	0.462789	0.128728	0.812534	-0.0957842	0.992359	0.206301	0.401133	-0.137161	0.723126	-0.0173947	0.973079	-0.139844	0.73622	0.0719938	0.900132	0.076872	0.978322	-0.00578098	0.995433	0.216387	0.341298	-0.0273994	0.9141	-0.218472	0.347532
FBgn0010238	CG12369	2R	2156	50	49	37	48	64	52	63	55	40	373	63	64	-0.2759	0.628287	0.099454	0.874754	0.372614	0.451889	0.108466	0.928661	0.244346	0.887855	0.814382	0.148837	0.483884	0.36526	0.305199	NA	0.0688402	0.975089	0.498552	0.407621	0.0455513	0.996169	-0.368278	0.515602	0.196688	0.762262	0.752677	0.102096	0.0383515	0.970177
FBgn0010246	CG9155	3L	3592	1964	2606	2736	3476	1588	1973	2275	2393	1240	1641	1686	1998	0.289766	0.279246	-0.433373	0.122701	-0.728437	0.00017314	-0.04733	0.96437	-0.305945	0.315153	-0.793756	0.00202361	-0.341842	0.401471	-0.632589	0.000174737	0.0213615	0.991746	-0.732085	0.000451852	-0.331812	0.241288	0.363208	0.332912	-0.399673	0.150089	-1.0826	7.93259e-09	0.379582	0.159501
FBgn0010247	CG40411	3R	3112	421	485	679	601	374	399	564	507	450	853	501	514	0.34625	0.129769	-0.316076	0.259322	-0.665984	0.000213496	0.136297	0.852929	-0.173368	0.90645	0.269773	0.579068	0.486559	0.3311	-0.273477	0.267604	0.321943	0.293587	0.124992	0.903969	-0.0942569	0.978322	-0.200668	0.832372	0.0457845	0.918579	-0.0355309	0.950232	0.457003	0.0663455
FBgn0010265	CG13389	2L	899	21059	21523	25182	24600	21830	21119	23628	21448	21897	20704	22678	23347	0.0894186	0.614712	-0.0912018	0.676173	-0.181208	0.13113	-0.0017974	0.997631	-0.0847909	0.998294	-0.175187	0.471472	-0.0791824	0.881198	-0.0865403	0.736034	0.0773508	0.892452	-0.167647	0.676765	-0.000780156	0.998781	0.154707	0.701973	-0.00214443	0.995111	-0.262838	0.10195	0.0874393	0.794177
FBgn0010269	CG15793	X	1799	700	638	679	712	598	618	695	697	723	807	597	630	-0.074732	0.787307	-0.232014	0.364305	-0.157956	0.472627	-0.0227971	0.98257	0.0463571	0.998294	0.0057292	0.991172	0.22458	0.630372	-0.141612	0.704798	-0.00529517	0.995323	0.0296784	0.97483	-0.189135	0.798156	-0.227629	0.655874	-0.227243	0.412236	0.080429	0.810719	0.203604	0.531886
FBgn0010278	CG4817	2R	2507	203	213	378	356	392	328	345	326	415	905	365	380	0.645719	0.00371708	0.643699	0.00934129	-0.00146902	0.997581	0.516182	0.0735259	-0.0637811	0.998294	1.17335	0.00186137	0.540686	0.281145	0.0378954	0.960875	0.0292985	0.984855	0.602263	0.232909	0.101902	0.978322	-0.475787	0.401177	0.67634	0.00536236	0.599707	0.141634	-0.0719911	0.893081
FBgn0010280	CG5444	3L	5134	2253	1986	2260	2120	2489	2636	2222	2172	2346	2771	2490	2447	-0.0839041	0.713682	0.165938	0.49653	0.251959	0.107902	-0.0279614	0.97522	0.0516135	0.998294	0.0790014	0.802236	-0.0773983	0.901331	0.183432	0.357413	-0.0671444	0.944592	0.107415	0.832069	0.125823	0.903464	0.00820437	0.993147	0.103126	0.724993	0.165152	0.419547	-0.194242	0.491219
FBgn0010282	CG10281	3R	1938	535	482	441	423	530	535	381	531	506	855	514	507	-0.353373	0.0959333	-0.0358772	0.918872	0.319081	0.105493	-0.196545	0.791711	0.0987624	0.998294	0.192781	0.676758	0.208197	0.77752	0.231171	0.418449	-0.0695872	0.954265	0.348161	0.588315	0.102862	0.982707	-0.256616	0.736058	-0.102078	0.780283	0.502806	0.15032	-0.1826	0.706894
FBgn0010287	CG7562	2L	983	95	91	131	111	163	104	111	124	175	132	108	131	0.216906	0.622016	0.358404	0.411915	0.141665	0.766414	0.191485	0.831961	0.00665076	0.998294	0.415515	0.44777	0.087998	0.943091	0.00310931	0.999467	-0.112624	0.944592	0.192968	0.854665	-0.00570586	0.996482	-0.184094	0.867995	0.214459	0.683129	0.221612	0.70439	-0.129241	0.857875
FBgn0010288	CG4265	2L	1196	1072	1069	1518	1564	1659	1678	1146	1408	1405	1639	1513	1723	0.38161	0.0138846	0.520001	0.00343244	0.141649	0.421442	0.152686	0.813741	-0.185651	0.852053	0.302852	0.23271	-0.196521	0.60476	0.0850022	0.854496	-0.0572479	0.958544	0.131457	0.839847	0.264203	0.617314	0.133449	0.824507	0.461878	0.0192453	-0.0682432	0.798723	-0.342499	0.193426
FBgn0010292	CG1430	X	1518	418	351	387	313	413	309	381	401	445	410	409	399	-0.252446	0.389481	-0.18927	0.574334	0.0640177	0.868211	-0.0495676	0.962998	0.167698	0.971469	-0.0247775	0.966242	0.142727	0.877771	0.190072	0.661509	0.124244	0.893742	0.0258754	0.983417	0.0134098	0.996169	-0.0225848	0.987382	-0.0387531	0.935125	0.211572	0.605578	0.131059	0.792503
FBgn0010300	CG10719	2L	12088	644	610	494	433	551	496	877	506	812	2346	421	763	-0.546644	0.00407156	-0.353476	0.111942	0.195203	0.403281	0.043011	0.974537	0.41979	0.268821	0.877292	0.0404022	0.962601	0.00773894	0.257765	0.590823	0.113938	0.941807	0.661427	0.205956	-0.160074	0.970023	-0.371892	0.545624	-0.174341	0.735791	1.22825	0.000474719	0.369205	0.378517
FBgn0010303	CG4353	X	5689	1271	1209	1393	1321	1209	1269	1336	1367	1252	1634	1343	1352	-0.00371712	0.988742	-0.101051	0.703369	-0.0974712	0.646532	0.0380948	0.966157	0.0417075	0.998294	0.024513	0.957509	0.122244	0.850566	0.0119142	0.980694	0.0923304	0.899535	-0.0125882	0.992396	-0.0325164	0.994746	-0.0315394	0.97385	0.00601882	0.990204	0.030185	0.929781	0.138438	0.688893
FBgn0010309	CG10739	2L	3334	151	153	167	194	229	154	186	173	237	288	196	155	0.104233	0.80887	0.199744	0.632276	0.0962101	0.82732	0.12678	0.891725	0.0315865	0.998294	0.508763	0.223955	0.277296	0.696942	-0.0123633	0.987984	-0.0960641	0.954265	0.345962	0.572028	-0.0473472	0.994746	-0.362783	0.571214	0.0836096	0.877377	0.405372	0.303739	-0.0568104	0.941859
FBgn0010313	CG2530	3R	9294	1605	1263	1995	1832	2568	2491	2017	1988	2314	2613	2046	2340	0.272968	0.201799	0.68808	0.000372426	0.423222	0.000834077	0.357114	0.230904	0.106548	0.985295	0.560251	0.0171245	-0.109312	0.807683	0.200539	0.403144	-0.204564	0.522649	0.183293	0.622125	0.0895639	0.977672	-0.100327	0.872485	0.474388	0.0369307	0.301878	0.075911	-0.304216	0.12561
FBgn0010315	CG9096	X	2453	497	457	505	550	474	435	487	443	553	896	511	476	0.0112358	0.974231	-0.168691	0.546663	-0.179818	0.434771	-0.105849	0.891725	-0.109707	0.998294	0.357395	0.364446	0.469924	0.276919	-0.0636212	0.928203	0.0894966	0.932281	0.425467	0.404098	0.0475438	0.994746	-0.367992	0.515602	-0.0608358	0.877071	0.341542	0.358683	0.0517701	0.921091
FBgn0010316	CG1772	2R	2530	334	311	519	563	458	513	572	315	449	859	395	714	0.58524	0.00317928	0.463182	0.0661554	-0.118344	0.672767	0.280758	0.680633	-0.154538	0.998294	0.687125	0.0820246	0.246607	0.743295	0.0392845	0.968474	0.118806	0.937036	0.301645	0.705244	0.17847	0.956978	-0.101565	0.941039	0.583079	0.106963	0.167884	0.745198	-0.0994782	0.89134
FBgn0010328	CG5965	3R	6161	2160	2125	2502	2524	2519	2381	2574	2491	2647	3602	2458	2414	0.0940762	0.632852	0.0853504	0.718194	-0.00782268	0.974018	0.1462	0.759128	0.0579682	0.998294	0.331387	0.203072	0.244471	0.513609	-0.0206542	0.967529	-0.0234804	0.983608	0.176578	0.721489	-0.0801422	0.978322	-0.262384	0.532836	0.0690197	0.815535	0.24314	0.288914	0.0671168	0.853246
FBgn0010333	CG2248	3L	1805	2369	2723	2651	2665	2700	2871	2568	2575	2625	2929	2697	2845	-0.0710356	0.77691	0.0247	0.939985	0.0968586	0.616355	-0.0634133	0.929811	0.00394694	0.998294	-0.0608148	0.861426	-0.078238	0.895351	0.0780372	0.83352	-0.0250078	0.983646	0.00706139	0.996197	0.0700472	0.982707	0.0518779	0.941039	0.00645567	0.990204	0.0112089	0.962604	-0.0920159	0.80746
FBgn0010339	CG8340	2R	1304	784	834	634	704	685	697	738	729	743	823	759	743	-0.393708	0.0389267	-0.320128	0.154922	0.074126	0.779051	-0.202791	0.649606	0.159751	0.917896	-0.220781	0.478173	0.0915032	0.903762	0.169009	0.607872	0.0908267	0.918249	-0.0080013	0.996562	0.00248795	0.996705	-0.00135462	0.999341	-0.212107	0.438564	0.163768	0.585111	0.101044	0.806546
FBgn0010340	CG9852	3R	1200	297	347	403	352	364	401	347	346	375	372	370	380	0.0884827	0.807623	0.136362	0.698418	0.0483218	0.890783	0.0183634	0.989825	-0.0581218	0.998294	0.0254889	0.966059	-0.0914016	0.925967	0.0113645	0.985617	-0.0411114	0.976891	0.00705666	0.997471	0.0705633	0.994439	0.0498092	0.965524	0.0973803	0.819945	-0.056041	0.903478	-0.114778	0.813926
FBgn0010341	CG12530	X	2078	5637	5684	5258	5436	5992	5890	5278	5609	5362	5667	5191	5225	-0.212315	0.153865	-0.0345467	0.894632	0.178672	0.184228	-0.12878	0.807353	0.0717514	0.998294	-0.216851	0.309442	-0.17492	0.538407	-0.014393	0.975036	-0.194669	0.439707	-0.0788455	0.884035	-0.0878799	0.971685	-0.023982	0.970423	-0.227638	0.259374	-0.00529099	0.979783	-0.100895	0.761332
FBgn0010342	CG1825	2R	1814	187	127	188	184	181	147	205	194	194	806	171	187	0.101216	0.834	-0.0397412	0.940594	-0.143463	0.698237	0.204558	0.807514	0.114872	0.998294	0.93182	0.069767	0.718362	0.122126	-0.0251085	0.976957	0.0858529	0.956629	0.599421	0.320136	-0.148393	0.956978	-0.571207	0.262614	0.0684545	0.909728	0.771574	0.102133	0.276089	0.525952
FBgn0010348	CG8385	3L	1549	12392	12822	11437	11231	11399	11840	11151	11311	10559	11166	11575	11694	-0.282844	0.0367275	-0.215872	0.286264	0.0657733	0.718094	-0.232533	0.421788	0.0363212	0.998294	-0.389244	0.0264963	-0.165843	0.58839	0.0580649	0.865775	-0.0161422	0.990505	-0.143007	0.683633	0.0180673	0.996169	0.149126	0.634642	-0.223663	0.269607	-0.109127	0.477681	-0.0281709	0.950596
FBgn0010350	CG7962	3L	2609	2014	2005	1672	1817	2112	2042	1684	1921	1900	2069	2102	1672	-0.329711	0.0361254	-0.0563539	0.825811	0.274744	0.0558732	-0.216774	0.583283	0.0874724	0.998294	-0.197114	0.424314	-0.133703	0.743295	0.119741	0.80428	-0.136024	0.844994	0.032444	0.966749	0.0295263	0.996169	-0.011781	0.992539	-0.194151	0.526733	0.129981	0.563494	-0.173737	0.586898
FBgn0010352	CG11661	3L	4384	30856	35362	31095	30969	34824	31142	33805	32319	35095	32051	28252	27702	-0.223081	0.201463	-0.11073	0.64799	0.113756	0.40327	-0.0793093	0.908814	0.134006	0.829445	-0.15445	0.594215	-0.04095	0.947525	-0.121197	0.534939	-0.23796	0.22813	-0.0695972	0.911939	-0.252921	0.299531	-0.19452	0.608652	-0.345174	0.0878079	0.0664451	0.789176	0.0256671	0.951855
FBgn0010355	CG17603	3R	6873	1683	1614	2185	1971	2242	1970	1968	1731	1976	2146	1918	1853	0.194931	0.288833	0.239194	0.235712	0.0453903	0.839002	0.0751228	0.91813	-0.103212	0.998294	0.129873	0.638184	-0.0990226	0.849561	-0.108257	0.757715	-0.161108	0.678486	0.0505664	0.944401	-0.00245113	0.996705	-0.0651067	0.92945	0.0774019	0.798564	-0.0602084	0.821381	-0.157321	0.617195
FBgn0010356	CG7704	2R	2362	474	525	686	664	669	615	646	476	630	803	590	572	0.287723	0.184476	0.244459	0.341639	-0.0428632	0.873273	0.0688036	0.942145	-0.171735	0.963419	0.300602	0.378611	0.0685429	0.938288	-0.172886	0.581907	-0.14287	0.817677	0.207218	0.765643	0.017125	0.996169	-0.203657	0.750987	0.0977184	0.795164	0.0280231	0.943719	-0.160332	0.725647
FBgn0010379	CG4006	3R	4869	1729	1961	1849	1787	1989	2138	1745	1748	1771	2220	1892	2009	-0.151881	0.482099	0.055631	0.857054	0.209096	0.22189	-0.148052	0.796316	-0.00532479	0.998294	-0.0753376	0.835945	-0.120199	0.833074	0.116074	0.699689	-0.091854	0.901352	0.078602	0.903969	0.116704	0.925658	0.0262217	0.975894	-0.0336446	0.931685	0.0756288	0.785123	-0.211583	0.453459
FBgn0010380	CG12532	X	3228	3336	3641	3265	3296	3685	3712	3186	3486	3295	3608	3356	3467	-0.218282	0.199089	-0.0201745	0.944467	0.199575	0.154876	-0.13455	0.816581	0.0696127	0.998294	-0.195579	0.423114	-0.167895	0.608041	0.0750995	0.83346	-0.125494	0.787531	-0.0509064	0.937109	0.000276122	0.999362	0.0389147	0.953311	-0.142033	0.599789	0.0217071	0.925129	-0.122469	0.716718
FBgn0010382	CG3938	2L	3946	240	182	459	422	110	126	328	341	193	1966	274	303	0.868254	0.000143153	-0.851435	0.00572054	-1.74245	8.11965e-18	0.48263	0.15073	-0.284728	0.471811	0.48506	0.364084	0.357223	0.398065	-0.495681	0.0128023	0.980926	9.17842e-06	0.229435	0.718423	-0.204879	0.828445	-0.197767	0.720852	0.309009	0.406536	0.231744	0.644986	1.37181	4.74904e-09
FBgn0010387	CG8627	3L	420	169	167	362	286	437	336	296	264	246	203	186	419	0.752538	0.00268931	1.0223	2.2568e-05	0.260657	0.366553	0.545377	0.0688605	-0.120615	0.998294	0.198882	0.715718	-0.64712	0.087881	-0.0446143	0.965584	-0.22406	0.81695	-0.316909	0.633132	0.0466392	0.995876	0.253809	0.79163	0.595094	0.183722	-0.467909	0.237289	-0.40305	0.186362
FBgn0010389	CG7223	3R	3838	46	46	34	44	40	49	53	58	38	35	29	51	-0.285686	0.621066	-0.119712	0.855769	0.168003	0.788388	0.117955	0.922288	0.253455	0.87049	-0.299758	0.665802	-0.147775	0.90232	0.0225943	NA	-0.0796237	0.971849	-0.32979	NA	-0.248436	0.879618	0.059381	0.965689	-0.228787	0.752372	-0.0707846	0.925088	0.254203	0.733062
FBgn0010391	CG2522	X	2056	1365	1597	1317	1402	1076	1118	1196	1377	1140	1313	1279	1235	-0.249804	0.230815	-0.517154	0.0129068	-0.271309	0.101402	-0.252991	0.546133	-0.0235004	0.998294	-0.435409	0.0865731	0.0742086	0.916435	-0.0830333	0.852886	0.160578	0.734426	-0.157763	0.772159	-0.0578174	0.994439	0.0864034	0.907744	-0.335642	0.155539	-0.192378	0.404418	0.236885	0.436321
FBgn0010395	CG1762	2L	3340	3287	3092	3719	3610	3253	2906	3764	3482	3358	3107	3152	3410	0.0651938	0.753729	-0.15381	0.467702	-0.219782	0.0918354	0.0930614	0.88345	0.0323519	0.998294	-0.154502	0.58884	9.12967e-05	0.99961	-0.128698	0.6033	0.0698056	0.933676	-0.241677	0.521079	-0.159237	0.817915	0.0679012	0.931499	-0.0705645	0.813224	-0.217062	0.30166	0.247925	0.257873
FBgn0010397	CG10119	2R	2450	2074	3025	2011	2174	2679	2541	2079	2452	1828	1764	1845	2141	-0.39705	0.11679	-0.0705374	0.853874	0.340605	0.00889474	-0.212149	0.748701	0.145551	0.958034	-0.630863	0.030202	-0.568743	0.00205782	-0.0436708	0.940246	-0.370227	0.0556785	-0.393865	0.217976	-0.189328	0.821201	0.183208	0.722838	-0.436092	0.145825	-0.25538	0.231855	-0.172375	0.600682
FBgn0010398	CG6098	2L	1874	70	71	75	72	114	76	76	56	63	199	63	74	-0.0629704	0.917549	0.273043	0.578903	0.331042	0.449473	-0.120234	0.921791	-0.0555587	0.998294	0.408483	0.527194	0.159987	0.89171	-0.0463087	0.964345	-0.294688	0.672027	0.380085	NA	0.0138461	0.996482	-0.311771	0.68966	-0.128737	0.842284	0.398297	0.488387	-0.395774	0.479559
FBgn0010406	CG8194	3L	1663	1122	1175	1883	1765	1809	1552	1850	1386	1905	1800	1436	1825	0.518717	0.000524677	0.427035	0.0233137	-0.0896015	0.648969	0.356976	0.289734	-0.101445	0.998294	0.479283	0.0446564	0.0647314	0.930532	-0.122928	0.789486	-0.0517489	0.972219	0.0871541	0.915746	-0.0159187	0.996169	-0.113892	0.888513	0.369683	0.140757	-0.0226162	0.944223	-0.0300877	0.961142
FBgn0010408	CG3395	3L	917	24102	22607	25868	27055	22757	22407	24685	19488	24219	23235	24499	24971	0.0457617	0.827486	-0.149644	0.460199	-0.196092	0.117323	-0.148536	0.801812	-0.182912	0.830985	-0.153923	0.527785	-0.00148218	0.997952	-0.0711988	0.825808	0.106597	0.822531	0.00590856	0.997384	0.117659	0.956978	0.107431	0.824507	-0.0298917	0.925075	-0.198241	0.242888	-0.0119096	0.98243
FBgn0010409	CG6510	2R	635	20767	23768	22592	22532	22343	21767	22324	21807	22788	21819	22156	22229	-0.113423	0.585001	-0.116673	0.628718	-0.00327981	0.98619	-0.0893464	0.892616	0.0185403	0.998294	-0.173672	0.516903	-0.0534745	0.926801	-0.000859492	0.999467	-0.00826819	0.993685	-0.0781678	0.888248	-0.0213943	0.996169	0.0442227	0.946911	-0.115838	0.68945	-0.06134	0.783298	0.021114	0.961248
FBgn0010411	CG8900	2R	606	26293	18811	25344	26755	23427	23108	25733	16738	25485	24399	24906	25330	0.0732761	0.816848	-0.0549823	0.874287	-0.131199	0.35927	-0.138468	0.881656	-0.191418	0.92193	-0.0327319	0.945016	0.0259014	0.965045	-0.0283668	0.951102	0.0868225	0.877291	0.118363	0.883391	0.172237	0.911391	0.060465	0.92945	0.0418356	0.925075	-0.10605	0.59942	-0.104171	0.847553
FBgn0010412	CG4464	X	949	19817	19665	20713	20962	15750	14993	20017	18945	18092	17884	17915	18236	-0.0551847	0.774547	-0.456848	0.00241378	-0.40467	4.45656e-05	-0.0957718	0.865381	-0.0423681	0.998294	-0.307776	0.117929	0.146328	0.645871	-0.174677	0.230207	0.204154	0.344931	-0.202998	0.521616	-0.129331	0.871906	0.0588174	0.929098	-0.234736	0.21617	-0.253672	0.0709616	0.351799	0.0383064
FBgn0010415	CG10497	2R	3982	2250	1945	2475	2322	2513	2411	2458	2321	2495	2586	2434	2402	0.0586467	0.816848	0.122732	0.614997	0.0655697	0.728437	0.0964531	0.885744	0.0422602	0.998294	0.0878296	0.778591	-0.0279089	0.963639	0.0325904	0.951102	-0.0402994	0.972119	-0.0115527	0.991137	-0.0127468	0.996169	-0.013552	0.98768	0.0888979	0.77689	0.0327167	0.898989	-0.0210274	0.963134
FBgn0010416	CG9984	X	2297	686	784	798	824	784	744	802	769	791	972	828	747	0.0066424	0.984624	-0.0490643	0.881406	-0.0558425	0.815041	0.0101458	0.991676	0.00502584	0.998294	0.0651488	0.881561	0.113347	0.871792	-0.017211	0.977541	0.0240106	0.986582	0.0541673	0.948074	-0.0239467	0.996169	-0.0871573	0.929098	-0.0146545	0.978842	0.06149	0.862938	0.0588236	0.894595
FBgn0010417	CG32211	3L	2056	394	413	508	560	632	540	514	574	605	700	510	541	0.258124	0.279492	0.411509	0.0738651	0.154354	0.513046	0.304844	0.405969	0.0661725	0.998294	0.464209	0.123667	0.0695036	0.938091	-0.000464161	0.999971	-0.151402	0.812538	0.137756	0.84551	-0.0707666	0.994439	-0.217413	0.703894	0.252192	0.387239	0.218088	0.476986	-0.0773926	0.870713
FBgn0010421	CG6538	3R	1118	235	224	247	271	272	242	257	291	285	428	295	262	0.0381953	0.928205	0.0528995	0.895801	0.0151974	0.971521	0.145923	0.855228	0.103427	0.998294	0.376547	0.385247	0.297857	0.633228	0.103069	0.885557	0.0824316	0.954265	0.207135	0.797861	-0.00656258	0.996482	-0.208759	0.814391	0.153186	0.713077	0.335056	0.422036	0.106666	0.84047
FBgn0010422	CG3710	2L	1773	455	414	511	502	524	394	483	505	542	664	494	497	0.0840552	0.778295	-0.0299249	0.939859	-0.112603	0.699921	0.0908149	0.909922	0.0137745	0.998294	0.259168	0.463853	0.266994	0.62117	-0.00771169	0.990369	0.0825783	0.951102	0.158012	0.812961	-0.0237138	0.996169	-0.187903	0.780405	0.0721344	0.851705	0.181284	0.577517	0.123517	0.798051
FBgn0010424	CG7930	3L	1059	94	106	157	194	126	182	145	167	167	104	155	171	0.604458	0.0588225	0.460812	0.267679	-0.13254	0.780032	0.427249	0.334088	-0.0807356	0.998294	0.192658	0.775214	-0.144125	0.907179	-0.0615179	0.948189	0.0387014	0.984855	-0.181225	0.870588	0.023485	0.996169	0.172482	0.881763	0.521216	0.145719	-0.284006	0.613563	0.0276085	0.975039
FBgn0010434	CG11949	2R	5899	1717	1619	2260	2303	2369	1947	2411	1816	2177	2071	1588	1981	0.311042	0.0387651	0.254509	0.234692	-0.0536431	0.804541	0.225977	0.630491	-0.0501431	0.998294	0.158252	0.589404	-0.0840625	0.903121	-0.296814	0.153186	-0.25247	0.480053	-0.0791656	0.92166	-0.227029	0.795033	-0.173819	0.775544	-0.015843	0.975397	-0.143357	0.547286	-0.00610426	0.990994
FBgn0010435	CG2727	2R	2694	670	643	985	884	658	668	1014	963	768	695	758	856	0.362757	0.0502283	-0.0867005	0.768882	-0.449819	0.00604411	0.459648	0.0420812	0.116738	0.992292	-0.0229759	0.963907	0.0607597	0.943091	-0.168178	0.614739	0.23404	0.517021	-0.470749	0.141206	-0.287287	0.405545	0.164672	0.819669	0.17515	0.567849	-0.366712	0.171285	0.567245	0.00298007
FBgn0010438	CG4337	3R	575	111	103	111	93	156	164	96	109	154	250	133	145	-0.17888	0.69901	0.434361	0.219772	0.609733	0.0407098	-0.107821	0.921791	0.0369483	0.998294	0.56154	0.252837	0.16724	0.877771	0.321953	0.426413	-0.167567	0.860429	0.57314	0.308599	0.293715	0.74535	-0.291344	0.726427	0.233116	0.624049	0.677368	0.109825	-0.542125	0.125679
FBgn0010441	CG5974	3R	1931	376	363	414	386	500	459	325	320	390	476	418	465	-0.0187072	0.958611	0.257994	0.323822	0.278143	0.184228	-0.243573	0.600929	-0.213157	0.807695	0.0346697	0.952319	-0.193306	0.752251	0.141531	0.763065	-0.118102	0.885049	0.269445	0.638095	0.358364	0.289261	0.0727073	0.946698	0.134545	0.71641	0.0540566	0.900771	-0.51557	0.0240486
FBgn0010470	CG9847	2R	1350	1746	1755	2033	2004	1920	2045	1711	1828	1721	1741	2058	2114	0.0697015	0.748001	0.0740215	0.786878	0.00540972	0.984115	-0.0615386	0.929778	-0.124598	0.963419	-0.192067	0.468914	-0.250745	0.460608	0.0660796	0.871934	0.0489155	0.964768	-0.122512	0.818816	0.18689	0.749093	0.300151	0.289083	0.13418	0.611202	-0.260269	0.160772	-0.137578	0.695903
FBgn0010482	CG9432	2R	6271	162	105	127	148	111	129	143	140	135	127	92	139	-0.0771848	0.887627	-0.221991	0.64183	-0.145912	0.739839	0.00270486	0.997631	0.0639813	0.998294	-0.157654	0.813009	0.0331822	0.979848	-0.145199	0.857486	-0.0500457	0.979981	-0.147481	0.892325	-0.220015	0.896388	-0.0732363	0.9595	-0.265109	0.639352	-0.0888524	0.887323	0.222517	0.68758
FBgn0010488	CG3845	2R	5618	9422	10366	8758	8637	10845	10160	8737	9781	9126	11527	9491	8610	-0.313832	0.0352656	-0.0203377	0.942195	0.296508	0.00538726	-0.162697	0.747371	0.129735	0.936154	-0.125806	0.652604	-0.0990681	0.833811	0.0758144	0.847875	-0.21441	0.402211	0.0457118	0.948302	-0.0579819	0.994439	-0.116932	0.837531	-0.234359	0.318182	0.186247	0.292591	-0.152624	0.608468
FBgn0010497	CG5304	2L	2426	7977	9185	11211	14021	12974	13577	10024	10306	9347	10093	11085	13058	0.404858	0.0391945	0.508192	0.00675756	0.101076	0.67063	0.146046	0.793528	-0.225388	0.633435	-0.00784511	0.986319	-0.50176	0.00105063	-0.0367646	0.958896	-0.142245	0.789286	-0.159339	0.630904	0.194595	0.74826	0.343899	0.122469	0.359683	0.113429	-0.408697	0.021451	-0.35152	0.0672671
FBgn0010501	CG5370	2R	1749	57	34	66	51	41	62	47	39	62	150	71	62	0.17707	0.781656	0.065489	0.930234	-0.112459	0.862967	-0.0902218	0.947034	-0.181044	0.985295	0.593582	0.322982	0.398431	0.557979	0.112529	NA	0.182913	0.877291	0.53904	NA	0.340734	0.692832	-0.241083	0.805861	0.333915	0.591708	0.431371	0.4479	-0.178582	0.836414
FBgn0010504	CG11546	2R	2078	2022	2122	2548	2443	2419	2494	2217	2437	2191	1965	2423	2662	0.13062	0.501443	0.137223	0.563764	0.007902	0.975502	0.0770736	0.916008	-0.0435363	0.998294	-0.167159	0.591329	-0.285059	0.410606	0.0462695	0.928203	0.0277567	0.981149	-0.235847	0.593197	0.0859356	0.978322	0.306813	0.394169	0.173943	0.502097	-0.292571	0.188171	-0.0549911	0.902035
FBgn0010516	CG8996	2R	1579	13385	13885	14452	15221	16891	15532	13558	12928	15046	14466	15066	15999	-0.0123018	0.958611	0.13949	0.494307	0.153569	0.24116	-0.117107	0.821519	-0.10416	0.977693	-0.0667333	0.821092	-0.196315	0.506438	0.0842663	0.785891	-0.0736024	0.907426	0.0544633	0.929869	0.184133	0.670824	0.120051	0.803605	0.0712091	0.803822	-0.0529323	0.823322	-0.260955	0.172858
FBgn0010520	CG4539	2L	758	203	143	176	173	223	148	167	206	237	209	218	188	-0.107705	0.816858	-0.00996333	0.986275	0.0988947	0.820682	0.0221823	0.989825	0.105739	0.998294	0.153167	0.79787	0.141125	0.900218	0.184186	0.734096	0.0874411	0.958544	0.118165	0.915746	0.068353	0.994746	-0.0576126	0.966368	0.105985	0.844718	0.252499	0.589442	0.033117	0.969244
FBgn0010531	CG17753	2R	959	1446	1622	1969	1880	1879	2038	1700	1548	1899	1486	1894	1834	0.18655	0.355516	0.239909	0.324103	0.0557606	0.809853	-0.00224193	0.997631	-0.174381	0.761514	-0.0323254	0.952869	-0.241272	0.635131	-0.0214584	0.968164	-0.0825388	0.925775	-0.0277842	0.980086	0.152439	0.856721	0.158589	0.83359	0.159332	0.580187	-0.206201	0.527039	-0.239751	0.383491
FBgn0010548	CG11140	2R	2923	2250	2708	3611	3606	3705	4129	2974	2840	2788	2965	3444	4034	0.392901	0.0277987	0.533762	0.0131477	0.147184	0.438841	0.129897	0.83987	-0.240126	0.255996	0.0253851	0.954428	-0.486481	0.0164888	0.0679022	0.889214	-0.0784913	0.944529	-0.11016	0.812587	0.297819	0.305078	0.400005	0.0681693	0.452369	0.0474981	-0.367671	0.00464932	-0.393012	0.0639082
FBgn0010549	CG8799	2R	4499	64	81	100	122	193	240	78	72	180	197	246	251	0.409913	0.327499	1.3145	2.19721e-05	0.891722	0.00132033	-0.0247399	0.989825	-0.307854	0.688307	0.927058	0.0296111	-0.205212	0.81298	0.881555	2.55751e-05	0.136753	0.894545	0.851942	0.031649	1.2823	3.80528e-09	0.338977	0.586783	1.47114	6.89788e-08	0.556131	0.178505	-1.30014	4.21542e-06
FBgn0010551	CG15081	2R	1614	5790	6507	5478	5652	4490	4693	5215	5293	4545	5467	5162	5517	-0.271978	0.100412	-0.50927	0.00568271	-0.24146	0.0863093	-0.284588	0.323015	-0.0286518	0.998294	-0.467846	0.0210272	0.0406658	0.947176	-0.0350341	0.939557	0.182577	0.572967	-0.16563	0.657373	-0.00773519	0.996427	0.143526	0.745424	-0.306987	0.146171	-0.201521	0.216945	0.205814	0.420103
FBgn0010575	CG5580	2R	10397	1041	974	1218	1094	1204	1171	1212	1319	1128	1719	1111	1032	0.062548	0.815472	0.12818	0.602711	0.0664569	0.771233	0.22367	0.56467	0.160466	0.89149	0.276286	0.426857	0.150414	0.829804	-0.0779473	0.882229	-0.150339	0.759513	0.0482915	0.961956	-0.241703	0.591622	-0.281236	0.613545	-0.0235662	0.956844	0.216575	0.522019	0.108478	0.770396
FBgn0010583	CG3727	2L	3735	1040	1172	1016	954	1129	1128	947	1060	1001	1229	996	992	-0.292157	0.134588	-0.0738136	0.801044	0.220319	0.200155	-0.198978	0.693465	0.0691998	0.998294	-0.169187	0.608549	-0.0892336	0.898256	0.0330861	0.957521	-0.183083	0.627453	0.040359	0.963949	-0.0404831	0.994746	-0.0927818	0.907856	-0.257152	0.316795	0.117369	0.691721	-0.140454	0.701671
FBgn0010590	CG8392	2R	852	2506	2384	2177	2178	1566	1600	1851	1971	1793	1941	1722	1933	-0.294622	0.045034	-0.710608	1.28594e-05	-0.420364	0.00125525	-0.402359	0.0678801	-0.123516	0.963419	-0.553424	0.00294005	0.149376	0.725003	-0.21319	0.287858	0.170502	0.69275	-0.127054	0.795621	-0.0867047	0.978322	0.0243203	0.975931	-0.5144	0.00407001	-0.264189	0.113256	0.279513	0.233438
FBgn0010591	CG8946	2R	2077	2240	2868	2611	2800	2306	2043	2477	3101	2342	2411	2521	2377	-0.0506463	0.876284	-0.327111	0.17941	-0.282364	0.0390178	0.0370915	0.974537	0.0824163	0.998294	-0.272982	0.360706	0.0515538	0.938091	-0.112348	0.722317	0.143827	0.745865	-0.300826	0.446069	-0.190017	0.826088	0.0927747	0.879389	-0.167046	0.620651	-0.228249	0.21415	0.361641	0.154291
FBgn0010602	CG3018	2L	1363	1389	1404	1269	1341	1279	1236	1219	1338	1233	1611	1322	1209	-0.225944	0.205907	-0.249633	0.226082	-0.0238394	0.921456	-0.190732	0.669166	0.0201859	0.998294	-0.157706	0.621302	0.0861186	0.9062	-0.0193642	0.974776	-0.0073049	0.995323	0.0400269	0.964213	-0.0411008	0.994746	-0.0915267	0.919788	-0.246188	0.303168	0.0631877	0.852114	0.0438661	0.923759
FBgn0010607	CG8886	2L	1089	116	187	288	243	283	170	272	207	284	365	233	224	0.593055	0.0788999	0.399606	0.374043	-0.188589	0.634992	0.415923	0.39663	-0.0706893	0.998294	0.728332	0.0902848	0.318462	0.634852	-0.15332	0.789486	0.00346463	0.996908	0.258634	0.722079	-0.0759039	0.994439	-0.335251	0.580668	0.411382	0.338399	0.200097	0.650764	0.0947256	0.899089
FBgn0010611	CG4311	2R	2570	689	818	668	775	836	759	622	775	693	771	742	739	-0.188521	0.488622	-0.0252033	0.942838	0.166144	0.450707	-0.164207	0.817163	0.00497417	0.998294	-0.213749	0.538507	-0.179696	0.71778	0.0531493	0.932848	-0.111052	0.875441	-0.0321664	0.976275	0.0437638	0.994746	0.0664935	0.941389	-0.133066	0.705862	-0.0286686	0.941271	-0.155853	0.709339
FBgn0010612	CG6105	2L	733	9965	8812	7116	7483	7363	7522	7618	6004	8117	7830	6886	7657	-0.485327	0.000377304	-0.426365	0.0161179	0.0574687	0.762239	-0.489112	0.0391802	-0.0426295	0.998294	-0.401247	0.0523305	0.02401	0.972367	0.0158841	0.975036	-0.0485817	0.963162	0.118882	0.843705	0.0558643	0.994746	-0.073281	0.917	-0.464944	0.00974719	0.0781503	0.734215	-0.103469	0.806974
FBgn0010620	CG10939	2R	1717	2740	2690	1752	1787	1690	1548	2379	2582	2306	2323	1944	1949	-0.735675	4.65985e-09	-0.831198	2.83893e-08	-0.0983373	0.578901	-0.195427	0.61491	0.487305	0.000817801	-0.398282	0.0543179	0.412712	0.0521726	0.150363	0.514198	0.230839	0.344931	-0.18631	0.650609	-0.346451	0.129427	-0.179525	0.660486	-0.575362	0.000316851	0.326783	0.0574083	0.612498	0.00028382
FBgn0010621	CG8439	2R	1948	2993	4154	3037	3015	2821	3215	2177	2862	2266	3100	2838	2818	-0.357995	0.126765	-0.3277	0.262917	0.0285789	0.915412	-0.486169	0.145267	-0.175749	0.912781	-0.560493	0.0543751	-0.229609	0.608339	-0.0706198	0.850927	-0.103041	0.891953	-0.0183007	0.987528	0.113616	0.974662	0.125193	0.853628	-0.425069	0.115372	-0.220329	0.358019	-0.22304	0.572897
FBgn0010622	CG9893	2R	1174	513	547	535	584	642	613	541	605	645	612	607	554	-0.0540273	0.867629	0.132086	0.636785	0.187561	0.380429	0.0260791	0.980573	0.0729492	0.998294	0.0575827	0.903462	-0.0612212	0.942043	0.0666111	0.923325	-0.114117	0.883522	0.0296442	0.977885	-0.0110802	0.996169	-0.050475	0.961648	0.0159767	0.9762	0.11081	0.772669	-0.10239	0.814622
FBgn0010638	CG10130	2R	792	3077	3396	2269	2333	2180	2497	2258	2257	2099	2271	2351	2439	-0.611211	1.71465e-05	-0.549116	0.0070351	0.054869	0.830169	-0.552575	0.00397464	0.0224236	0.998294	-0.723037	6.29261e-05	-0.162754	0.726461	0.0757261	0.846564	0.0116048	0.993685	-0.140459	0.750188	0.049441	0.994439	0.177545	0.635366	-0.529369	0.00295508	-0.121571	0.547963	-0.0316576	0.953245
FBgn0010651	CG15095	2R	2999	16716	14203	9441	12367	15754	9756	11876	17123	13773	10802	15381	6744	-0.609381	0.001285	-0.369905	0.199513	0.228271	0.440153	-0.145217	0.854063	0.351475	0.363012	-0.471972	0.0835668	-0.0923126	0.921817	0.0142057	0.985887	-0.067824	0.973819	-0.280651	0.618625	-0.140147	0.977793	-0.0376265	0.981622	-0.504954	0.231923	0.121014	0.7488	0.194602	0.717117
FBgn0010660	CG3820	2R	5334	525	447	599	552	625	465	539	626	657	1199	629	523	0.105855	0.720834	0.0517595	0.893761	-0.0524075	0.875	0.156345	0.821061	0.0584664	0.998294	0.632072	0.0889351	0.518418	0.25174	0.021228	0.976957	0.0563382	0.973819	0.430467	0.430269	-0.039736	0.994746	-0.439769	0.414176	0.124207	0.75325	0.525069	0.137407	0.114549	0.819126
FBgn0010741	CG6302	3L	993	868	792	793	898	707	729	813	694	808	846	720	854	-0.10284	0.696855	-0.301244	0.186643	-0.198261	0.350858	-0.198886	0.690006	-0.0972296	0.998294	-0.178961	0.57973	0.113884	0.871792	-0.0707436	0.919291	0.0985587	0.918249	0.030163	0.97488	0.0270991	0.996169	-0.0132831	0.992539	-0.180776	0.569364	-0.076433	0.826598	0.0836059	0.855291
FBgn0010747	CG4659	3L	2015	2220	2672	2426	2547	2330	2124	2318	2539	2173	2462	2342	2300	-0.108024	0.669675	-0.234929	0.329543	-0.128811	0.423864	-0.0839983	0.91813	0.0165342	0.998294	-0.25358	0.359813	-0.0180203	0.978966	-0.0717285	0.860533	0.0403485	0.972172	-0.160083	0.717376	-0.0880139	0.977672	0.0572737	0.935461	-0.182557	0.54076	-0.149079	0.447977	0.142286	0.654686
FBgn0010750	CG2503	3R	2040	298	316	403	434	372	328	385	434	386	551	407	395	0.297034	0.231488	0.0770726	0.827752	-0.220414	0.358393	0.286215	0.507936	0.0172763	0.998294	0.365667	0.353587	0.273745	0.640726	-0.0332906	0.964062	0.155095	0.826548	0.0676444	0.94923	-0.0526107	0.994746	-0.124068	0.905218	0.254277	0.422138	0.0907115	0.848215	0.233004	0.527178
FBgn0010762	CG32067	3L	5110	867	730	727	754	864	835	912	862	765	1110	731	743	-0.232672	0.294418	-0.0145527	0.966747	0.220864	0.218703	0.062024	0.936881	0.275285	0.316901	0.0330899	0.952869	0.0489955	0.959347	0.0144617	0.979186	-0.20091	0.571266	-0.0270295	0.98067	-0.266865	0.457857	-0.232148	0.716907	-0.217268	0.452285	0.254447	0.438918	0.0796758	0.844153
FBgn0010768	CG5557	3R	3258	83	59	105	119	90	81	131	77	115	141	73	92	0.448905	0.274533	0.140039	0.800044	-0.317567	0.416977	0.297206	0.70997	-0.0311038	0.998294	0.484979	0.377649	0.319799	0.663172	-0.265363	0.598531	-0.0442398	0.983608	0.118838	0.926178	-0.212825	0.91613	-0.32797	0.679001	0.0852433	0.905318	0.103626	0.871787	0.241774	0.723525
FBgn0010770	CG5786	3R	1477	174	127	97	109	147	103	126	163	137	226	128	113	-0.599371	0.0751992	-0.336671	0.425251	0.264265	0.518802	-0.102929	0.92467	0.342094	0.547227	0.0560767	0.945202	0.285835	0.723126	0.168087	0.809462	-0.0440749	0.982683	0.140121	0.902992	-0.207291	0.907019	-0.307419	0.703993	-0.377161	0.379566	0.547469	0.231981	0.20215	0.748214
FBgn0010772	CG2179	3R	3307	1944	1455	2308	2203	2405	2374	2278	1487	2218	2343	2190	2332	0.264885	0.246354	0.371912	0.119493	0.110856	0.513046	0.0518788	0.966734	-0.162472	0.978841	0.224869	0.477285	-0.134886	0.737968	0.0246249	0.961278	-0.09055	0.89097	0.151991	0.836002	0.187806	0.897074	0.0414513	0.954428	0.283773	0.314408	-0.0328624	0.897124	-0.297458	0.426542
FBgn0010774	CG1101	3R	1328	1836	1503	1738	1845	1643	1475	1716	1667	1599	2371	1921	1788	-0.0298023	0.923455	-0.197588	0.42629	-0.169444	0.299263	-0.056619	0.942333	-0.0281696	0.998294	0.0496379	0.917655	0.231871	0.631538	0.0674235	0.887489	0.215016	0.462055	0.104685	0.892325	0.0924044	0.974662	-0.026097	0.981893	0.0375891	0.925664	0.080291	0.830532	0.135231	0.664153
FBgn0010786	CG9165	3L	2556	747	1041	527	563	515	525	536	838	564	1039	536	478	-0.797482	0.000400334	-0.834164	0.000657671	-0.0361824	0.904556	-0.356924	0.483913	0.27652	0.718928	-0.310643	0.502174	0.407356	0.432845	-0.0703312	0.92043	-0.047335	0.975089	0.0732418	0.954134	-0.352563	0.532986	-0.417947	0.458376	-0.860107	0.000602825	0.409018	0.293836	0.377398	0.331446
FBgn0010803	CG9735	3R	1683	622	723	450	454	492	432	431	489	486	582	418	459	-0.677244	0.00039316	-0.621442	0.00421437	0.0564306	0.84707	-0.547337	0.0353044	0.0646049	0.998294	-0.481207	0.114326	0.113259	0.888471	-0.0182982	0.977541	-0.0790016	0.948438	0.0934791	0.915746	-0.0858673	0.98682	-0.186935	0.795005	-0.689346	0.00185709	0.170884	0.618066	0.0168759	0.975906
FBgn0010808	CG1715	3R	940	2971	3054	2875	3066	2802	2655	2784	2892	2895	2970	2895	2920	-0.151097	0.406977	-0.242936	0.201663	-0.0922299	0.593314	-0.156145	0.73145	-0.0124892	0.998294	-0.215748	0.360878	0.0280052	0.963634	-0.00763325	0.985167	0.0695625	0.926658	-0.0504481	0.937109	0.00303227	0.996482	0.041194	0.952798	-0.160361	0.507534	-0.0654302	0.785827	0.0760913	0.831286
FBgn0010812	CG2708	3R	3987	696	910	665	713	668	622	610	801	534	648	678	578	-0.33796	0.174459	-0.40249	0.122706	-0.0648561	0.797297	-0.222757	0.730813	0.0696326	0.998294	-0.576079	0.0626309	-0.180588	0.746949	-0.0958709	0.865775	-0.0476468	0.973858	-0.305981	0.56969	-0.161829	0.927218	0.124615	0.889038	-0.436365	0.128885	-0.255294	0.378619	0.141707	0.763061
FBgn0010825	CG6964	3L	8713	3219	2689	3282	3084	3570	3600	3133	2917	2888	3537	3329	3166	-0.0244742	0.93237	0.170451	0.481155	0.19804	0.176799	-0.043542	0.961258	-0.01986	0.998294	-0.0654156	0.853404	-0.224082	0.477504	0.0489101	0.921909	-0.14884	0.709992	-0.0178406	0.98337	0.0655359	0.988669	0.0713251	0.92728	0.0232579	0.957305	-0.0399683	0.880371	-0.216478	0.372098
FBgn0010830	CG11238	3L	2469	509	542	612	584	527	468	567	622	528	698	530	556	0.0498205	0.87365	-0.179289	0.515381	-0.229752	0.258925	0.0838814	0.920243	0.0375678	0.998294	0.0259411	0.961539	0.188397	0.760326	-0.103302	0.83943	0.0970964	0.915685	-0.0558892	0.954864	-0.141513	0.920595	-0.0928694	0.92945	-0.0639821	0.867476	-0.0193693	0.962781	0.26438	0.377615
FBgn0010877	CG7129	3R	3277	1600	2391	2374	2265	2359	2292	2009	1867	1834	2315	1827	2153	0.0748039	0.847805	0.105812	0.778748	0.0324986	0.877312	-0.107591	0.906194	-0.188774	0.645051	-0.126182	0.772672	-0.227695	0.514865	-0.181081	0.489041	-0.21972	0.495267	-0.0078984	0.996335	0.00595164	0.996482	0.00136136	0.999341	-0.111795	0.81007	-0.207707	0.334347	-0.232809	0.322091
FBgn0010894	CG10624	3L	2065	161	133	187	162	201	159	160	126	180	232	183	191	0.10382	0.817484	0.167953	0.685179	0.0641314	0.881374	-0.0949362	0.928661	-0.16089	0.992292	0.243767	0.647752	0.0852473	0.941187	0.0933018	0.914525	0.0319115	0.987176	0.303765	0.685293	0.268134	0.776607	-0.0545137	0.96879	0.211209	0.635928	0.149054	0.78143	-0.269863	0.587843
FBgn0010905	CG16757	3L	10136	10639	11434	13841	13890	13644	11781	13479	11024	11631	11336	8924	11007	0.190569	0.234934	0.0926384	0.695765	-0.097263	0.52667	0.0591659	0.936881	-0.11316	0.992292	-0.121941	0.647752	-0.205087	0.498534	-0.413906	0.00651599	-0.328797	0.165336	-0.176601	0.69149	-0.283581	0.520314	-0.13691	0.811881	-0.250764	0.334714	-0.310778	0.0267557	-0.0289567	0.955482
FBgn0010909	CG16973	3L	6418	4201	3436	3206	3253	3217	2760	3480	3007	2913	3507	2739	2973	-0.363336	0.0334048	-0.445107	0.0250244	-0.0839144	0.637061	-0.285225	0.393155	0.0517027	0.998294	-0.418163	0.0701708	0.0241521	0.972774	-0.145268	0.531691	-0.0740659	0.932119	-0.111121	0.837706	-0.192655	0.763287	-0.099773	0.865649	-0.508898	0.00986236	-0.0610476	0.795609	0.135231	0.690515
FBgn0010926	CG5824	3R	4315	575	478	533	536	525	429	544	593	593	686	607	474	-0.106257	0.720834	-0.238493	0.407903	-0.133067	0.599092	0.0257802	0.982079	0.120481	0.992359	0.0851875	0.847961	0.300674	0.503779	0.0331453	0.967209	0.137497	0.879404	0.0570278	0.94923	-0.0855377	0.994121	-0.147379	0.865358	-0.068897	0.878704	0.191156	0.530371	0.260922	0.420103
FBgn0011016	CG5474	3L	950	1736	1835	1568	1602	1359	1365	1414	1685	1417	1555	1622	1504	-0.298779	0.0650487	-0.480897	0.00796436	-0.184529	0.261431	-0.256163	0.505211	0.0174664	0.998294	-0.432529	0.0467335	0.0445946	0.94619	0.00275292	0.996789	0.164236	0.7027	-0.148855	0.790811	-0.017064	0.996169	0.120103	0.838262	-0.29478	0.177131	-0.138932	0.530147	0.196315	0.563213
FBgn0011202	CG1768	2L	5260	3944	3492	3672	3956	4244	3940	3990	3146	3612	3917	3304	3538	-0.0939846	0.661956	0.0317473	0.907748	0.127374	0.416835	-0.127773	0.850419	-0.0390751	0.998294	-0.161928	0.517159	-0.186514	0.513609	-0.125684	0.643708	-0.256511	0.213005	-0.0215796	0.980752	-0.0794583	0.98682	-0.0755848	0.898238	-0.225213	0.324167	-0.0677875	0.757019	-0.167533	0.629686
FBgn0011204	CG12086	3L	2801	2198	2562	2206	2148	2558	2556	2275	3030	2571	3048	2352	2067	-0.255964	0.181281	-0.0021887	0.995286	0.257105	0.0592561	0.0634511	0.947034	0.279159	0.499618	0.0457941	0.903462	0.0524749	0.93611	0.0411046	0.941706	-0.207226	0.538668	-0.0215478	0.984639	-0.24634	0.741771	-0.259133	0.489249	-0.211824	0.464493	0.304416	0.059625	0.070256	0.89445
FBgn0011205	CG5725	3L	2386	2253	2387	1946	2227	2057	2184	1778	2463	1824	1767	1919	1741	-0.279056	0.124033	-0.226076	0.313824	0.0530082	0.832499	-0.180726	0.793208	0.0608984	0.998294	-0.527273	0.0136683	-0.289064	0.370123	-0.150366	0.644409	-0.208885	0.547947	-0.295339	0.553681	-0.201193	0.857379	0.0746142	0.92945	-0.43921	0.0223846	-0.250474	0.277468	0.0196216	0.975039
FBgn0011206	CG4760	3L	6538	1051	1052	943	772	1314	1238	1090	868	1203	1160	911	874	-0.412361	0.0337313	0.168026	0.46131	0.581816	0.000282801	-0.166386	0.78875	0.196092	0.881106	-0.0142346	0.977014	-0.167384	0.723064	0.0709394	0.916285	-0.485466	0.00343589	0.153531	0.811263	-0.140455	0.931343	-0.310305	0.410466	-0.336725	0.114443	0.384554	0.134324	-0.340771	0.187261
FBgn0011207	CG3959	2L	2045	1320	1245	1299	1207	1293	1094	1345	1344	1431	1444	1346	1219	-0.162964	0.415415	-0.205525	0.371115	-0.0427491	0.863395	-0.0133846	0.989825	0.138042	0.930009	-0.0187229	0.963875	0.179705	0.683313	0.0517694	0.929203	0.0801704	0.935836	-0.00350719	0.997908	-0.0889471	0.978322	-0.097204	0.89607	-0.108911	0.724993	0.142872	0.569416	0.187653	0.527178
FBgn0011211	CG3612	2R	2252	92286	100102	76017	79461	71081	72693	77808	93684	79241	80380	75294	80366	-0.432861	0.00133304	-0.511006	0.00221868	-0.080911	0.630248	-0.223201	0.590446	0.171259	0.840555	-0.439649	0.0150976	0.0718276	0.883397	0.0231393	0.96055	0.0889554	0.883657	-0.190044	0.648716	-0.15294	0.885861	0.0184522	0.977018	-0.407038	0.0214041	-0.0103065	0.960767	0.26178	0.331446
FBgn0011217	CG7425	3R	2084	12774	11796	14996	14557	14492	15519	15200	13700	13596	15010	14828	15953	0.130381	0.436969	0.181057	0.413973	0.0529623	0.794955	0.139658	0.780046	0.0177425	0.998294	0.0314217	0.91745	-0.140599	0.688249	0.0774477	0.809534	0.0150436	0.99258	-0.111337	0.787895	0.0549474	0.994439	0.15596	0.621564	0.205196	0.341646	-0.0966456	0.51712	-0.0346022	0.941859
FBgn0011224	CG31000	3R	7770	35	39	61	69	195	352	34	56	129	923	141	218	0.539366	0.244169	2.32932	1.92653e-11	1.75636	2.10417e-08	0.108317	NA	-0.21014	0.963492	0.890844	0.0695777	0.131298	0.878976	0.894559	0.000206303	-0.380467	0.462055	0.492815	0.26589	1.10951	4.753e-05	-0.197659	0.754586	1.76129	1.16527e-07	1.27096	0.0015907	-1.96034	4.9676e-09
FBgn0011225	CG5695	3R	5025	20774	19421	20426	20396	18783	17295	19776	19808	18352	17055	18512	19004	-0.109409	0.517656	-0.256443	0.141176	-0.14824	0.230226	-0.0976111	0.863785	0.00710834	0.998294	-0.350027	0.100394	-0.0917855	0.862398	-0.0948723	0.691528	0.0375639	0.971672	-0.242147	0.461354	-0.101356	0.931603	0.127268	0.797619	-0.20717	0.308931	-0.242743	0.161645	0.1516	0.552515
FBgn0011227	CG8764	2R	331	2569	2502	2475	2404	1838	1971	2415	2340	2077	1992	1910	2212	-0.185794	0.258046	-0.500066	0.00593812	-0.317594	0.0332801	-0.162957	0.707214	0.0135413	0.998294	-0.477955	0.0238797	0.0187637	0.980481	-0.202859	0.370027	0.0835855	0.932281	-0.299523	0.354793	-0.213695	0.670661	0.0650963	0.93984	-0.397184	0.0460436	-0.296045	0.121002	0.323929	0.14121
FBgn0011230	CG14472	2L	16216	12206	10303	12749	11786	15179	12347	12671	10971	13023	10864	11339	10469	-0.0084262	0.976459	0.175724	0.467236	0.186916	0.242745	-0.0108412	0.991485	-0.00193306	0.998808	-0.0857226	0.817982	-0.242899	0.546102	-0.13757	0.570987	-0.318319	0.136056	-0.0705966	0.928237	-0.132452	0.90911	-0.0717469	0.934338	-0.152125	0.584682	-0.0758964	0.809439	-0.185808	0.542271
FBgn0011232	CG3766	2L	3558	1883	1773	1746	1833	1296	1159	1654	1986	1565	1727	1456	1284	-0.160475	0.387703	-0.662665	5.15585e-05	-0.505216	7.50414e-05	-0.0784904	0.921791	0.0667119	0.998294	-0.324281	0.154916	0.32257	0.232449	-0.329659	0.0536703	0.128595	0.841301	-0.22605	0.612177	-0.380559	0.200136	-0.185364	0.707428	-0.508184	0.00758529	-0.165842	0.430166	0.560085	0.00655515
FBgn0011236	CG5575	2R	3070	374	543	469	462	323	430	504	454	356	567	407	419	-0.106521	0.789093	-0.349896	0.353983	-0.251583	0.398751	-0.019238	0.989825	0.0782854	0.998294	-0.163051	0.763311	0.147937	0.88404	-0.130583	0.78101	0.0864102	0.954265	-0.133852	0.889781	-0.210874	0.78986	-0.0682713	0.955557	-0.243573	0.556885	-0.0647774	0.89884	0.326367	0.390685
FBgn0011241	CG10536	2R	1036	297	252	300	307	337	348	328	241	324	375	325	347	0.011141	0.979352	0.20396	0.526068	0.194503	0.462624	-0.0262808	0.983784	-0.0316896	0.998294	0.142163	0.76511	-0.0417667	0.967035	0.142453	0.782426	-0.0393972	0.978881	0.154022	0.866312	0.165434	0.931343	0.00208299	0.999341	0.166195	0.672941	0.133798	0.754516	-0.225418	0.621353
FBgn0011259	CG18405	2L	9751	98	59	163	131	53	58	117	97	61	152	74	119	0.655038	0.0843178	-0.494432	0.316423	-1.18575	7.60771e-05	0.245348	0.79026	-0.261251	0.831209	0.142745	0.859731	0.375416	0.603537	-0.351649	0.402773	0.43936	0.337393	-0.0681423	0.963071	-0.11192	0.990325	-0.0258869	0.98768	0.146172	0.834604	-0.331257	0.568529	0.791833	0.0315661
FBgn0011260	CG4700	2R	3580	65	71	99	90	77	74	73	94	53	586	60	96	0.291775	0.520783	0.0386099	0.949751	-0.254856	0.555776	0.145918	0.895967	-0.0729349	0.998294	0.443244	0.409183	0.246632	0.630372	-0.143491	0.864524	0.0164815	0.993685	0.24566	0.677486	-0.0763125	0.994746	-0.432459	0.38339	0.0657499	0.933579	0.614767	0.214959	0.137573	0.856474
FBgn0011272	CG4651	2L	1186	24542	24194	25849	26367	23674	23393	24448	23529	23817	22828	24699	25647	-0.0339602	0.869947	-0.151683	0.446148	-0.118268	0.402118	-0.0990125	0.854469	-0.0657911	0.998294	-0.237459	0.282591	-0.0813557	0.877771	-0.0285632	0.947438	0.0741651	0.905724	-0.131047	0.763887	0.0355949	0.994746	0.154316	0.68966	-0.0653603	0.810865	-0.20359	0.220242	0.0467365	0.90293
FBgn0011274	CG6794	2L	4306	637	850	805	735	822	821	897	799	724	635	761	819	-0.0811299	0.822141	0.0352629	0.929797	0.119615	0.589482	0.0881201	0.921791	0.16497	0.89898	-0.279334	0.482353	-0.299066	0.500014	0.0536588	0.929443	-0.0671152	0.953405	-0.360676	0.412719	-0.117629	0.956978	0.226765	0.707305	-0.0271375	0.961356	-0.204277	0.545272	0.0625539	0.890978
FBgn0011284	CG11276	3L	1305	30595	32536	34474	35491	31214	29942	32248	31595	32252	31705	33350	34165	0.0134027	0.955908	-0.148457	0.471645	-0.162898	0.186417	-0.0628328	0.922076	-0.0750634	0.998294	-0.159689	0.50476	-0.00814172	0.988682	-0.0274074	0.950471	0.118149	0.767001	-0.091674	0.848621	0.0460002	0.994439	0.125924	0.756674	-0.0173359	0.96352	-0.172715	0.279212	0.0809744	0.800738
FBgn0011286	CG10844	2R	16056	81	60	86	101	117	91	110	88	83	64	94	120	0.232831	0.640101	0.39224	0.384408	0.155124	0.743036	0.281427	0.717858	0.0799427	0.998294	-0.0765221	0.932272	-0.316757	0.683313	0.137046	0.865775	0.0180331	0.993685	-0.301923	NA	0.0542433	0.994746	0.301459	0.723251	0.407168	0.404677	-0.253771	0.676383	-0.0391042	0.965477
FBgn0011289	CG5930	3R	1595	2227	2400	3497	3457	3043	2959	3446	2877	2760	3078	2606	3295	0.442558	0.0019163	0.262132	0.186467	-0.179989	0.190243	0.329781	0.259999	-0.0764286	0.998294	0.140968	0.599016	-0.111143	0.791466	-0.192087	0.505913	-0.0380886	0.976538	-0.201213	0.620162	-0.111801	0.974662	0.0653897	0.941039	0.223719	0.446045	-0.296489	0.0325818	0.0909638	0.816748
FBgn0011290	CG17358	3R	1234	433	447	486	426	443	470	418	439	463	578	389	491	-0.0792658	0.805886	-0.0483018	0.892817	0.0313488	0.927521	-0.106731	0.891725	-0.0309238	0.998294	0.046268	0.931105	0.0907901	0.920036	-0.0239464	0.975663	-0.0607676	0.971672	0.149007	0.838742	0.00485079	0.996482	-0.144807	0.876331	-0.107041	0.799723	0.122623	0.758594	-0.066803	0.899073
FBgn0011291	CG4079	2L	777	155	127	166	158	180	147	162	178	172	197	181	162	0.0611281	0.898337	0.0964318	0.833956	0.0358788	0.938499	0.148923	0.876004	0.0879195	0.998294	0.16461	0.774963	0.0723324	0.950187	0.0791121	0.928203	0.0418283	0.981149	0.0100504	0.997149	-0.0144375	0.996169	-0.0316258	0.982027	0.151975	0.762377	0.110431	0.843441	0.0726891	0.917941
FBgn0011296	CG4533	2R	741	220	271	270	330	158	160	332	400	180	229	166	253	0.142206	0.709771	-0.677016	0.0192514	-0.820362	0.000424055	0.404379	0.30023	0.256826	0.74006	-0.386608	0.391825	0.205619	0.812452	-0.34822	0.350027	0.26693	0.69275	-0.748954	0.0335282	-0.609282	0.0553326	0.061078	0.965524	-0.302806	0.507047	-0.509361	0.163983	1.10923	2.88392e-06
FBgn0011297	CG4084	2R	1704	200	246	381	431	408	374	296	305	326	417	404	456	0.680551	0.00464603	0.659789	0.00974858	-0.025248	0.942659	0.286831	0.570388	-0.309152	0.411025	0.47029	0.245583	-0.127984	0.883397	0.0888884	0.894812	0.103415	0.916689	0.163723	0.836002	0.409001	0.178814	0.217982	0.764085	0.765893	0.00268621	-0.162938	0.695209	-0.33296	0.253913
FBgn0011300	CG8224	2R	4839	3314	3019	3077	3023	3243	3539	3266	3085	3293	3515	3167	3225	-0.183566	0.275789	-0.00291488	0.993641	0.180617	0.299233	-0.0726694	0.915391	0.101233	0.980694	-0.0785062	0.78093	-0.0680317	0.916435	0.0855533	0.787335	-0.0962695	0.892185	-0.00131071	0.999109	-0.0201016	0.996169	-0.0315702	0.961648	-0.096773	0.730184	0.105497	0.574533	-0.0730773	0.857875
FBgn0011305	CG5655	2L	1760	340	289	504	550	394	363	489	368	416	498	501	465	0.581367	0.00575618	0.153289	0.631735	-0.431321	0.0221455	0.301808	0.522349	-0.194243	0.912781	0.314418	0.409072	0.164223	0.814839	-0.0892652	0.882516	0.290484	0.375008	-0.00891853	0.997149	0.116455	0.977672	0.116951	0.902436	0.4745	0.0625126	-0.236551	0.469723	0.183318	0.685936
FBgn0011327	CG3431	3L	1394	425	438	470	524	395	432	449	465	401	916	513	476	0.0666293	0.840037	-0.156564	0.61334	-0.222718	0.368855	-0.000285669	0.999718	-0.0577877	0.998294	0.324027	0.53022	0.388485	0.537656	0.0135849	0.981974	0.203305	0.7027	0.281513	0.730684	0.0712453	0.994439	-0.209641	0.834127	0.0779433	0.84012	0.254554	0.626509	0.152333	0.722836
FBgn0011335	CG6801	3L	1513	248	236	316	301	285	260	357	271	323	387	293	274	0.204162	0.493241	0.0610647	0.874287	-0.143156	0.621784	0.240796	0.692341	0.0578868	0.998294	0.321622	0.424247	0.247924	0.683313	-0.0819119	0.914525	0.0341023	0.983646	0.058852	0.958292	-0.140392	0.962529	-0.207316	0.793259	0.106567	0.806406	0.13176	0.758286	0.204986	0.657156
FBgn0011336	CG7748	3R	2703	5060	5773	4353	4266	4390	4201	4241	5150	4144	4436	4645	4725	-0.452926	0.00301841	-0.42832	0.0201247	0.0239482	0.901939	-0.256111	0.524454	0.154233	0.922189	-0.502544	0.0112889	-0.0740051	0.880649	0.136392	0.499077	0.101066	0.844994	-0.214704	0.608286	-0.0315424	0.995535	0.174801	0.582748	-0.312398	0.141636	-0.0555389	0.785827	0.143672	0.693896
FBgn0011361	CG9160	3L	740	5953	5981	5302	5646	4350	4520	5230	5240	4861	4815	4789	5210	-0.253394	0.084532	-0.517912	0.00178651	-0.267187	0.0565791	-0.253053	0.345597	-0.0114837	0.998294	-0.469302	0.0114596	0.0472695	0.940815	-0.101615	0.745377	0.141071	0.759513	-0.201152	0.554671	-0.0901989	0.970023	0.0954357	0.862827	-0.358013	0.0465884	-0.219151	0.206676	0.249141	0.26847
FBgn0011455	CG9762	3L	888	4595	4639	4512	4272	3246	3180	4623	4006	3836	3581	3669	3972	-0.202366	0.192743	-0.613191	6.16675e-05	-0.414052	0.000336185	-0.167067	0.717858	0.0230862	0.998294	-0.476815	0.0210896	0.125411	0.793356	-0.167687	0.411833	0.21493	0.401362	-0.290107	0.409665	-0.186018	0.773054	0.0881182	0.898238	-0.375276	0.0357532	-0.278366	0.141482	0.427041	0.0236408
FBgn0011474	CG3307	3R	4183	402	344	543	487	542	417	531	424	553	1361	502	467	0.316067	0.186331	0.238916	0.433877	-0.0749099	0.808514	0.232522	0.674681	-0.0466596	0.998294	0.91846	0.0246292	0.604677	0.206102	-0.0561184	0.932848	0.00197605	0.997259	0.598642	0.260579	-0.00747959	0.996482	-0.551898	0.287301	0.248684	0.429218	0.620876	0.135993	0.017622	0.976909
FBgn0011476	CG14865	3R	627	153	128	240	211	163	168	168	147	166	184	181	205	0.503479	0.0838411	0.121843	0.780691	-0.384606	0.171091	0.0646227	0.959682	-0.340227	0.444605	0.10675	0.86775	0.00164177	0.998203	-0.156231	0.793227	0.157463	0.868028	0.0367741	0.97921	0.201917	0.885861	0.140454	0.903597	0.309997	0.442617	-0.346306	0.413257	-0.0461596	0.950946
FBgn0011481	CG7187	3R	5521	2737	2626	3263	2963	3522	3333	3031	3367	3386	3932	3466	3163	0.0793793	0.712066	0.24242	0.193932	0.164515	0.284167	0.157899	0.747588	0.0820262	0.998294	0.250066	0.261512	0.0152793	0.979955	0.105244	0.773358	-0.0600936	0.951797	0.0824644	0.892325	0.0175055	0.996169	-0.07613	0.914526	0.185644	0.4442	0.174656	0.359085	-0.0737516	0.848651
FBgn0011509	CG33162	3L	1135	518	543	478	471	420	473	438	496	418	515	505	469	-0.283823	0.19179	-0.334254	0.203484	-0.0527903	0.872706	-0.233616	0.618196	0.0246274	0.998294	-0.345253	0.305471	-0.0167294	0.987043	0.0529647	0.937132	0.0889492	0.944529	-0.0924606	0.919777	0.0244523	0.996169	0.102399	0.925357	-0.225248	0.453582	-0.0720905	0.864996	0.0774182	0.886156
FBgn0011566	CG13761	X	1762	212	248	313	326	463	330	277	312	326	420	367	347	0.317627	0.259091	0.624988	0.0261795	0.313208	0.238721	0.226789	0.719161	-0.0517798	0.998294	0.439697	0.273722	-0.129793	0.893752	0.154585	0.740098	-0.131601	0.892185	0.189562	0.805298	0.204282	0.837814	-0.000267912	0.999519	0.480272	0.0906756	0.147253	0.734215	-0.362811	0.301844
FBgn0011570	CG17158	2L	1713	2195	2300	1898	2020	2259	2203	1795	2078	1957	2114	2014	2057	-0.324513	0.0387651	-0.113165	0.627983	0.212521	0.151469	-0.26824	0.429047	0.0315826	0.998294	-0.31685	0.158237	-0.196318	0.540516	0.0728568	0.863821	-0.139202	0.745006	-0.0288497	0.973231	0.0353225	0.994746	0.0537958	0.941039	-0.248771	0.251142	0.00441433	0.98529	-0.173309	0.59488
FBgn0011571	CG3606	X	1666	1130	1187	1107	1080	1228	1261	1110	1159	1092	1336	1230	1193	-0.211843	0.264354	-0.00108402	0.997478	0.211651	0.217702	-0.103114	0.879668	0.0942158	0.998294	-0.11704	0.724086	-0.10657	0.871792	0.157631	0.55439	-0.0521698	0.963162	-0.00800277	0.996335	0.0570277	0.994439	0.0524357	0.95208	-0.0479918	0.887405	0.0914108	0.757019	-0.107907	0.773282
FBgn0011573	CG12019	3L	1611	1219	1358	1439	1338	1532	1468	1452	1420	1444	1438	1392	1223	-0.0264092	0.930591	0.109201	0.675879	0.13739	0.438397	0.0654441	0.929024	0.0905051	0.998294	-0.0223712	0.95966	-0.121555	0.814839	-0.0571548	0.926353	-0.193892	0.613994	-0.087381	0.892325	-0.147969	0.890826	-0.0748346	0.931499	-0.0892471	0.802505	0.00538948	0.984512	-0.0397229	0.925203
FBgn0011576	CG3466	X	2467	5385	5755	7408	7773	5700	4998	6576	6896	5954	4988	6280	6545	0.30522	0.038534	-0.162566	0.448031	-0.470174	2.14429e-05	0.175892	0.674994	-0.110671	0.971469	-0.19293	0.531088	-0.0305367	0.970802	-0.209328	0.161393	0.229506	0.312548	-0.357495	0.301748	-0.0947656	0.958442	0.248821	0.565866	0.0855801	0.766588	-0.486236	0.012416	0.343829	0.0663455
FBgn0011584	CG4758	2L	2093	3961	3761	3774	3847	4434	3948	4129	3748	4420	4181	3991	3953	-0.149786	0.370189	0.0108433	0.968887	0.161872	0.246011	-0.0506071	0.941159	0.0907845	0.998294	-0.0254432	0.948571	-0.0310454	0.963241	0.0785503	0.812576	-0.086864	0.887722	0.0272698	0.972548	-0.0170173	0.996169	-0.0559969	0.941039	-0.0705946	0.805565	0.123742	0.580452	-0.0643518	0.864501
FBgn0011586	CG1871	X	1381	709	677	817	840	717	727	768	879	772	1070	778	751	0.119979	0.61325	-0.0434344	0.892255	-0.163376	0.420273	0.14861	0.814845	0.0377386	0.998294	0.198991	0.583015	0.230854	0.652608	-0.0842829	0.864524	0.0573789	0.960529	0.0436223	0.965926	-0.121487	0.956978	-0.171272	0.813536	0.026789	0.952684	0.0865003	0.821967	0.198871	0.567036
FBgn0011591	CG10580	3L	1959	76	72	122	114	120	201	92	96	81	76	203	225	0.472498	0.201709	0.870903	0.026346	0.410576	0.317346	0.189152	0.841643	-0.177699	0.981193	-0.0688057	0.93615	-0.630751	0.215587	0.658286	0.00393907	0.252879	0.748616	-0.219937	NA	0.870595	0.000411297	0.968806	0.00202108	1.25861	5.65607e-06	-0.453952	0.358213	-0.612711	0.15327
FBgn0011603	CG15444	2L	3664	4748	5340	6849	6883	7255	6216	6555	7248	6998	5920	6786	7163	0.302255	0.0585044	0.29876	0.137917	-0.00137197	0.995825	0.334564	0.230538	0.0546293	0.998294	0.1667	0.607492	-0.11496	0.854874	0.0431573	0.923325	0.0327447	0.976538	-0.17252	0.752197	-0.0154281	0.996169	0.144212	0.812816	0.339336	0.0954701	-0.123647	0.659083	0.0576483	0.888841
FBgn0011604	CG8625	2R	3647	800	784	831	906	990	860	789	963	892	1467	989	865	-0.000831538	0.997045	0.11222	0.669988	0.114169	0.600675	0.0560764	0.952119	0.0543885	0.998294	0.336752	0.36435	0.218283	0.731156	0.103916	0.84009	-0.0103478	0.993685	0.255334	0.695471	0.0419195	0.994746	-0.216137	0.780405	0.10812	0.750844	0.333187	0.336259	-0.0500161	0.924728
FBgn0011606	CG8590	X	4527	30	28	37	30	43	31	30	45	43	589	37	38	0.053087	0.946348	0.181565	0.790413	0.121402	0.859538	0.148361	NA	0.0798921	0.998294	0.573437	0.241785	0.294597	0.490769	0.0787331	NA	0.00326968	0.996908	0.313764	0.512727	-0.0155692	0.996169	-0.555353	0.126817	0.183626	0.80934	0.960568	0.0207025	0.0331747	0.975255
FBgn0011638	CG10922	2L	1549	961	1040	674	743	557	558	685	778	583	1094	808	751	-0.610323	0.000361505	-0.914328	4.95622e-07	-0.30494	0.106592	-0.475391	0.0561051	0.0835052	0.998294	-0.401462	0.323951	0.379106	0.492686	0.142967	0.710289	0.412702	0.0542288	0.0595562	0.960184	0.0520548	0.994746	-0.0227368	0.988798	-0.453277	0.0315979	0.146117	0.772317	0.388866	0.118559
FBgn0011640	CG8597	3L	2087	1344	1376	1706	1719	1942	1825	1560	1460	1711	1905	1624	1661	0.193406	0.278834	0.353623	0.0531491	0.162706	0.289483	0.0615014	0.929778	-0.117815	0.973119	0.212917	0.409423	-0.127209	0.768979	-0.0349458	0.94581	-0.198618	0.481006	0.146109	0.759661	0.082202	0.978322	-0.0739103	0.918192	0.152374	0.568189	0.0257993	0.924195	-0.285604	0.179971
FBgn0011642	CG32018	4	2180	1688	1537	2106	2069	2419	2517	1922	1653	2154	2121	2373	2431	0.233267	0.165481	0.495547	0.00642671	0.266632	0.0669134	0.0590676	0.936881	-0.153609	0.887855	0.212903	0.428651	-0.261753	0.403058	0.212131	0.205252	-0.0536147	0.958544	0.146268	0.777596	0.355613	0.142605	0.206311	0.586783	0.445786	0.0126129	-0.0129007	0.963511	-0.425163	0.0415531
FBgn0011648	CG12399	2L	3262	1329	1385	1487	1562	1780	2035	1492	1376	1480	2007	1466	1914	0.0326559	0.900958	0.37484	0.0899935	0.344975	0.0470736	-0.00403854	0.996321	-0.0330058	0.998294	0.156795	0.637358	-0.191811	0.714026	0.14836	0.72562	-0.166436	0.815796	0.155609	0.786251	0.174928	0.88187	0.0152367	0.992263	0.1903	0.568173	0.127487	0.671916	-0.372928	0.121537
FBgn0011655	CG1775	3R	3425	886	949	893	936	999	897	912	970	970	1068	895	912	-0.134924	0.560356	-0.0585743	0.843769	0.0773101	0.727958	-0.0421483	0.964339	0.0824121	0.998294	-0.0345983	0.93675	0.0262245	0.974216	0.00487988	0.993378	-0.0775088	0.933102	0.0104827	0.994336	-0.0808482	0.980613	-0.103707	0.881779	-0.131106	0.673076	0.0995197	0.734215	0.0122366	0.980738
FBgn0011656	CG1429	2R	6040	1797	1804	1772	1873	2026	2272	1918	1706	1665	1937	1747	2028	-0.113834	0.573426	0.148095	0.566997	0.262398	0.140313	-0.0684718	0.921791	0.0385211	0.998294	-0.180965	0.490514	-0.307859	0.335142	0.0664645	0.904604	-0.183881	0.705523	-0.10428	0.858262	0.0245386	0.996169	0.114857	0.856618	-0.0445015	0.90292	-0.0676081	0.795609	-0.216652	0.491219
FBgn0011659	CG11482	2R	2071	50	43	51	36	71	60	66	58	66	179	78	69	-0.176649	0.781415	0.322571	0.536177	0.489145	0.28268	0.211132	0.833906	0.260854	0.850859	0.712611	0.212526	0.364617	0.615678	0.399124	NA	0.0935882	0.958544	0.403666	NA	0.133357	0.978393	-0.260744	0.774526	0.439588	0.393727	0.728667	0.134324	-0.0446122	0.963803
FBgn0011660	CG8169	2R	3040	27	36	50	43	65	47	46	41	71	321	49	48	0.317647	0.585001	0.562875	0.281558	0.230302	0.675905	0.208399	NA	-0.0201248	0.998294	1.26253	0.0113946	0.63388	0.197208	0.0415283	NA	-0.120138	0.944592	0.782676	0.0957905	0.0687474	0.994746	-0.590031	0.172996	0.372121	0.558938	0.909129	0.0455611	-0.254781	0.733008
FBgn0011661	CG10701	X	3064	20762	18958	15967	16155	17740	19613	17755	17997	17806	18142	17408	17400	-0.431653	0.000596842	-0.184241	0.428735	0.244549	0.112334	-0.217646	0.483913	0.192983	0.424127	-0.317751	0.0991237	-0.124459	0.773517	0.132914	0.465205	-0.111825	0.852972	-0.0882547	0.849619	-0.0651567	0.982707	0.00918997	0.992263	-0.295038	0.104238	0.111471	0.490151	-0.0429677	0.923593
FBgn0011672	CG3671	3R	4782	5815	7445	4371	4380	5666	4930	4179	4283	5392	4439	5394	3226	-0.707608	5.35702e-05	-0.41591	0.0635065	0.297665	0.0135835	-0.647889	0.00308234	0.00340822	0.998294	-0.565333	0.0402962	-0.156393	0.770159	0.00161251	0.999665	-0.240507	0.702065	0.110247	0.874234	-0.00230879	0.997419	-0.104311	0.92945	-0.660501	0.0328122	0.118971	0.701832	-0.289472	0.150657
FBgn0011674	CG11312	2R	3887	117	130	164	151	289	207	97	105	122	129	169	184	0.195452	0.627747	0.816308	0.00602042	0.620156	0.019913	-0.28296	0.6696	-0.397428	0.322629	-0.129592	0.845008	-0.750509	0.0491735	0.140861	0.840309	-0.383396	0.322218	0.141901	0.899663	0.574962	0.0709816	0.368204	0.577032	0.358151	0.357254	-0.296524	0.541656	-1.10923	5.40748e-05
FBgn0011695	CG11390	2R	836	98	121	137	159	58	61	95	138	56	92	81	100	0.266099	0.51528	-0.856397	0.0200803	-1.1205	0.000125153	0.00495919	0.997214	-0.177802	0.985295	-0.542075	0.329156	0.112138	0.932275	-0.45975	0.140936	0.364049	0.490772	-0.433704	NA	-0.252712	0.856721	0.173266	0.881763	-0.332395	0.501398	-0.7375	0.0912507	0.797623	0.0378613
FBgn0011703	CG5371	2L	2577	117	137	93	81	43	76	57	109	63	1560	64	115	-0.598938	0.0799144	-0.99324	0.0129967	-0.400212	0.40954	-0.445978	0.398942	-0.00607515	0.998294	0.371111	0.443719	0.245907	0.53314	0.0329346	0.975036	0.26412	0.750269	0.248538	0.582931	0.0351713	0.996169	-0.183468	0.655918	-0.506148	0.28778	0.340684	0.369027	0.341741	0.637205
FBgn0011704	CG8975	2R	1593	982	1307	548	432	441	549	699	695	711	2169	430	410	-1.27334	2.2656e-09	-1.22361	3.83481e-07	0.0465375	0.907164	-0.686675	0.004592	0.457531	0.0489798	0.0574838	0.954036	0.880565	0.0241178	-0.164701	0.730181	-0.212458	0.729515	0.589486	0.298019	-0.667851	0.000400634	-0.931463	0.00596979	-1.45265	1.04019e-11	1.04108	0.00596032	0.470436	0.0828781
FBgn0011705	CG9552	2L	1613	1677	1411	1311	1404	2999	3106	1373	1986	2386	2181	2353	2284	-0.308263	0.100728	0.85089	1.35801e-06	1.17171	6.71437e-22	0.0352177	0.976339	0.279878	0.625117	0.36147	0.186017	-0.450416	0.0564576	0.738586	1.37612e-10	-0.382312	0.0282639	0.291351	0.590349	0.349417	0.426304	0.0678911	0.934327	0.454747	0.0211194	0.666785	0.000163262	-0.769019	0.00153574
FBgn0011708	CG4214	2L	1861	2309	2842	2462	2356	2110	2114	2005	2600	2011	2128	2576	2212	-0.223912	0.309649	-0.377122	0.0917874	-0.15655	0.329059	-0.209082	0.726653	-0.00992156	0.998294	-0.47499	0.0516857	-0.0990665	0.849288	0.013216	0.980272	0.14663	0.787531	-0.22959	0.63879	0.0200057	0.996169	0.242719	0.543473	-0.208886	0.509472	-0.26064	0.121367	0.137349	0.751326
FBgn0011710	CG1403	X	2026	1626	1610	1830	1854	1916	1623	1801	1887	1905	2067	1807	1905	0.0517871	0.825319	0.0198618	0.945383	-0.0310918	0.893005	0.0972301	0.881656	0.0488725	0.998294	0.104189	0.717554	0.0860956	0.885107	0.0314822	0.95176	0.0493391	0.964094	0.0039091	0.997616	-0.020414	0.996169	-0.0370381	0.961648	0.0809957	0.787962	0.0559593	0.822909	0.0807002	0.836932
FBgn0011715	CG1064	3R	1335	442	436	460	507	460	384	440	483	469	718	478	430	0.00514811	0.988614	-0.158368	0.591398	-0.162882	0.520636	-0.00909939	0.992092	-0.0123403	0.998294	0.211013	0.626897	0.328255	0.539898	-0.0580184	0.932848	0.0778092	0.953878	0.203548	0.780157	-0.0468586	0.994746	-0.244039	0.745424	-0.0616669	0.878072	0.203968	0.619719	0.143946	0.741739
FBgn0011725	CG31137	3R	3548	1294	1133	1421	1430	1439	1186	1417	1276	1342	2313	1444	1296	0.0962898	0.680663	0.00447638	0.990337	-0.0911819	0.668886	0.0607614	0.936049	-0.027545	0.998294	0.349873	0.345783	0.321277	0.533299	-0.0311197	0.959493	0.0429165	0.975089	0.269623	0.652874	-0.00485471	0.996482	-0.269023	0.68775	0.0595067	0.867476	0.259534	0.475284	0.0583898	0.898965
FBgn0011726	CG4254	2R	735	7757	6946	6267	6685	6175	6057	6376	6258	6099	7581	5744	6696	-0.30918	0.038534	-0.360463	0.039389	-0.0521081	0.779119	-0.278857	0.295613	0.0147707	0.998294	-0.283401	0.20917	0.0756702	0.890393	-0.033114	0.953843	0.00538714	0.995323	0.00753366	0.996197	-0.0489497	0.994746	-0.0693456	0.92945	-0.340909	0.103754	0.0227544	0.929781	0.065395	0.852493
FBgn0011737	CG4488	2L	2652	1044	998	667	749	1042	906	950	956	1086	1205	943	773	-0.639841	0.00010228	-0.17024	0.47594	0.471329	0.00334543	-0.166049	0.732191	0.41824	0.0304422	-0.0203887	0.961539	0.145083	0.775874	0.257436	0.381697	-0.171451	0.772121	0.148756	0.772159	-0.157	0.907019	-0.308249	0.489249	-0.345421	0.169771	0.604837	0.00140267	-0.00718497	0.989649
FBgn0011739	CG12072	3R	5803	2832	2741	4311	4259	4144	3948	4084	3396	3630	4034	3827	4739	0.477543	0.000161932	0.422195	0.00940344	-0.0530779	0.761278	0.309258	0.289332	-0.12887	0.973119	0.262713	0.217282	-0.14782	0.645871	0.0194807	0.975036	0.0574592	0.96007	-0.0621566	0.927587	0.141778	0.92738	0.197732	0.666706	0.48342	0.0184174	-0.207962	0.152752	-0.0886299	0.819923
FBgn0011740	CG18802	3R	4002	1804	1258	1912	1992	1319	1383	1824	2109	1947	1830	1991	1754	0.207958	0.453685	-0.266143	0.376615	-0.487689	0.00037846	0.239144	0.66228	0.055773	0.998294	0.112986	0.785206	0.372392	0.20068	-0.0335619	0.957521	0.404249	0.0505751	-0.142291	0.807454	-0.0895435	0.979419	0.0376169	0.968684	0.167437	0.664987	-0.0894009	0.754516	0.53211	0.00979101
FBgn0011741	CG11678	X	1347	651	679	621	670	558	506	608	632	575	633	593	560	-0.1709	0.472135	-0.413287	0.0528036	-0.242708	0.22061	-0.165026	0.77383	-0.00520707	0.998294	-0.304206	0.324085	0.0945699	0.907179	-0.123945	0.784016	0.0881458	0.930561	-0.125171	0.858262	-0.119564	0.956978	-0.00737228	0.995935	-0.305043	0.225315	-0.136795	0.676383	0.230851	0.448906
FBgn0011742	CG9901	X	2475	3225	3045	3815	3862	3754	3319	3578	3463	3361	3809	3269	3460	0.155237	0.354256	0.0648721	0.791669	-0.0896185	0.585705	0.0782558	0.900985	-0.0675029	0.998294	0.00522802	0.990711	-0.0533128	0.927606	-0.158278	0.423905	-0.0814205	0.900541	-0.0733062	0.892325	-0.0891223	0.970023	-0.0306159	0.965524	-0.0114342	0.978842	-0.147172	0.383395	0.0162438	0.971824
FBgn0011745	CG6174	3R	1469	3030	3096	2508	2641	2527	2515	2390	2743	2522	2665	2396	2644	-0.37655	0.00813477	-0.37597	0.0319321	-0.000461531	0.998889	-0.306443	0.29825	0.0426641	0.998294	-0.410713	0.0357557	-0.0332806	0.959347	-0.00776105	0.985908	-0.0175465	0.990136	-0.0808483	0.899384	-0.0522893	0.994746	0.0141841	0.98768	-0.382323	0.0420698	-0.0381609	0.880267	0.0452439	0.923116
FBgn0011747	CG1651	4	5777	5790	5232	7750	7342	8088	7479	7099	5930	7115	7858	7410	7080	0.313258	0.0297356	0.382746	0.0227803	0.0718676	0.656308	0.1433	0.801812	-0.14325	0.925915	0.246711	0.24518	-0.126677	0.688673	-0.0336542	0.941621	-0.112192	0.815796	0.0922456	0.872734	0.110361	0.95742	0.0108491	0.990057	0.272672	0.16922	-0.0614202	0.745858	-0.225219	0.389156
FBgn0011754	CG1830	X	3111	42480	38473	47658	46644	47739	45591	46839	45362	46715	41742	47384	46169	0.085163	0.647686	0.0978522	0.656096	0.0138713	0.941797	0.097767	0.865381	0.0181368	0.998294	-0.0495024	0.889125	-0.137557	0.751184	0.0110652	0.977541	-0.0129479	0.99258	-0.144884	0.763887	-0.00938319	0.996169	0.122485	0.8265	0.0927337	0.730184	-0.131235	0.56012	0.00385968	0.990994
FBgn0011760	CG6998	X	4416	6288	6184	6767	6753	7900	7795	6542	7078	6853	7755	6786	8001	-0.0173413	0.939428	0.221532	0.237531	0.241252	0.0439213	0.0411807	0.96065	0.05786	0.998294	0.03851	0.896155	-0.173648	0.535476	0.140143	0.626367	-0.0953841	0.892185	-0.00318841	0.997908	0.0770076	0.982745	0.0703619	0.926045	0.126416	0.663073	0.0583778	0.752994	-0.176222	0.517632
FBgn0011762	CG7108	3L	1569	37	23	62	58	70	52	40	52	50	200	57	43	0.656294	0.165304	0.713641	0.149471	0.0392603	0.953734	0.282046	NA	-0.157243	0.998294	0.922608	0.0901512	0.348044	0.626084	-0.122425	NA	-0.162172	0.894588	0.494009	NA	0.0460324	0.996169	-0.372279	0.560306	0.445338	0.470311	0.454526	0.421574	-0.286969	0.683307
FBgn0011763	CG4654	2R	2526	2528	2132	2325	2382	2329	2263	2511	2446	2725	3051	2269	2239	-0.115054	0.607755	-0.121509	0.630755	-0.0062801	0.978438	0.00651759	0.994154	0.11625	0.963419	0.117359	0.689834	0.239195	0.378914	-0.0370391	0.938981	-0.0410481	0.971849	0.110532	0.812587	-0.154583	0.817915	-0.279221	0.287301	-0.154171	0.586081	0.236709	0.140408	0.126777	0.678307
FBgn0011766	CG6376	3R	4778	3454	2975	3145	3359	3265	3171	3459	3459	3266	3755	3102	3125	-0.113127	0.60105	-0.0998402	0.689555	0.0138197	0.953003	0.0218125	0.981495	0.129328	0.915549	-0.058296	0.860175	0.0446237	0.940815	-0.0376038	0.937132	-0.0609123	0.944592	-0.0784324	0.886235	-0.169174	0.767275	-0.10651	0.831165	-0.153193	0.569364	0.0559646	0.809087	0.121186	0.687935
FBgn0011768	CG6598	3R	1337	4487	4465	5876	6166	5927	5823	5305	5848	5781	5933	5325	6913	0.288091	0.0394135	0.280596	0.114472	-0.00575057	0.979137	0.215873	0.537421	-0.0528001	0.998294	0.196038	0.379783	-0.0756003	0.879921	0.0401211	0.95176	0.0350705	0.979327	-0.0287126	0.966749	0.086863	0.982745	0.105598	0.883843	0.319796	0.204967	-0.0865906	0.658513	-0.0514097	0.90293
FBgn0011769	CG4205	3L	723	221	259	230	246	258	268	206	213	228	223	233	258	-0.136947	0.707698	0.0252841	0.955409	0.163878	0.596633	-0.231431	0.7171	-0.101347	0.998294	-0.23539	0.629517	-0.231582	0.744589	0.0540197	0.950471	-0.0967545	0.943631	0.0050459	0.997908	0.159079	0.931343	0.131765	0.905139	-0.0758867	0.875456	-0.106271	0.837173	-0.281329	0.463512
FBgn0011770	CG2227	X	996	37534	29692	35750	36113	30591	31999	37639	40304	35940	32665	32642	35852	-0.0349925	0.901328	-0.197497	0.433877	-0.165104	0.260208	0.119256	0.858418	0.156842	0.743901	-0.141901	0.65388	0.0557791	0.934988	-0.0442797	0.923325	0.101722	0.867495	-0.261413	0.443675	-0.199914	0.660601	0.0459554	0.952358	-0.081494	0.813729	-0.107713	0.636808	0.323132	0.11483
FBgn0011771	CG5837	3L	3777	991	1003	1153	1104	1253	1096	1051	1055	1091	1230	1072	1119	0.0432048	0.871338	0.124451	0.616039	0.0825859	0.694532	-0.00400382	0.996321	-0.0428683	0.998294	0.0291008	0.946608	-0.0852627	0.898256	-0.0183705	0.974776	-0.105544	0.877291	0.0335581	0.966749	0.0230932	0.996169	-0.0220238	0.981893	0.020801	0.960904	-0.011062	0.970726	-0.127906	0.709301
FBgn0011774	CG5247	3R	2149	485	347	332	339	550	438	345	353	388	573	398	422	-0.412028	0.130238	0.130887	0.728744	0.555637	0.00436355	-0.277289	0.590703	0.0895617	0.998294	0.0115843	0.988268	-0.0983	0.921538	0.266986	0.351343	-0.241065	0.568866	0.283876	0.648716	0.171599	0.884602	-0.125627	0.905799	-0.121951	0.785369	0.396606	0.263768	-0.442403	0.0898416
FBgn0011785	CG31132	3R	7244	1360	1355	1598	1622	1633	1319	1547	1355	1560	1834	1396	1323	0.109326	0.594046	0.0105204	0.975265	-0.0976662	0.64608	0.0109576	0.991485	-0.087879	0.998294	0.126335	0.666928	0.114866	0.849561	-0.204806	0.317049	-0.118329	0.861794	0.111866	0.85245	-0.111131	0.957537	-0.236032	0.543713	-0.10777	0.716809	0.0217242	0.939535	0.000169643	0.999856
FBgn0011787	CG5012	3L	738	970	1202	915	890	845	849	877	836	887	1028	972	980	-0.385772	0.0656978	-0.444063	0.0562124	-0.059853	0.799683	-0.375282	0.235059	-0.0210031	0.998294	-0.345819	0.26222	0.0884273	0.902045	0.124543	0.715639	0.168435	0.7027	0.0514282	0.948074	0.141423	0.896388	0.0783114	0.929098	-0.255136	0.386821	0.0308402	0.926196	0.0347364	0.94476
FBgn0011802	CG6539	3L	3963	186	131	176	192	201	134	184	149	210	543	175	124	0.0750929	0.877773	-0.0284552	0.960756	-0.102747	0.812873	-0.00833885	0.994154	-0.0660368	0.998294	0.75346	0.132131	0.612941	0.236494	-0.190483	0.756722	-0.115591	0.944529	0.631138	0.258025	-0.12867	0.978322	-0.619274	0.190661	-0.167289	0.771312	0.651119	0.155359	0.0166969	0.984303
FBgn0011817	CG7892	3L	6235	325	181	252	208	216	257	231	272	291	625	207	263	-0.234465	0.599025	-0.171729	0.726338	0.067944	0.873969	-0.0631461	0.964331	0.133693	0.998294	0.49357	0.34933	0.561146	0.275151	0.0402134	0.964345	-0.0239567	0.99258	0.503311	0.405658	-0.100875	0.986488	-0.527862	0.334355	-0.185014	0.743735	0.686155	0.0989024	0.095676	0.877066
FBgn0011818	CG9884	2L	3223	715	579	705	690	621	615	713	656	706	1113	624	696	-0.0232646	0.94722	-0.162266	0.579331	-0.140418	0.513046	-0.000727275	0.998835	0.0213559	0.998294	0.262105	0.521493	0.388013	0.391787	-0.0508977	0.933249	0.0676305	0.954494	0.247445	0.691762	-0.0734457	0.994439	-0.310256	0.5936	-0.0790581	0.842183	0.284056	0.427311	0.159142	0.655884
FBgn0011824	CG4038	2R	957	209	310	273	273	203	194	239	276	226	236	263	261	-0.0578721	0.904486	-0.450413	0.199017	-0.404859	0.0958963	-0.0746509	0.94811	-0.0246138	0.998294	-0.2958	0.556166	0.110666	0.916435	-0.0299812	0.96896	0.313213	0.419458	-0.204455	0.795621	-0.00570226	0.996482	0.181583	0.838262	-0.0921435	0.864812	-0.250772	0.537473	0.361574	0.297598
FBgn0011826	CG9842	X	5390	2536	2499	2552	2511	2534	2645	2663	2491	2418	3037	2460	2594	-0.123515	0.500251	-0.0610849	0.817252	0.0623824	0.762104	-0.0460575	0.950805	0.0709397	0.998294	-0.072921	0.819996	-0.00712649	0.990027	0.0190273	0.96896	-0.0501354	0.96257	-0.0229944	0.97766	-0.0544247	0.994439	-0.0440655	0.955557	-0.105195	0.70175	0.050087	0.857958	0.0117553	0.980447
FBgn0011836	CG6711	3L	3972	400	459	521	501	521	450	468	468	491	716	499	474	0.110177	0.717399	0.064602	0.85431	-0.0452516	0.877877	0.0345819	0.974558	-0.063793	0.998294	0.261351	0.524592	0.190772	0.785435	-0.0418989	0.95176	-0.01056	0.993982	0.213407	0.759661	0.0214887	0.996169	-0.193708	0.810912	0.0608101	0.884369	0.159912	0.695741	-0.0273227	0.962065
FBgn0011837	CG4070	X	5009	3585	4110	3875	3845	4297	4092	4104	3964	3902	4103	3518	3418	-0.127042	0.554009	0.0172029	0.956378	0.146492	0.291013	-0.0147944	0.989825	0.106986	0.971741	-0.124451	0.662695	-0.135795	0.689595	-0.124481	0.592902	-0.272295	0.152554	-0.106659	0.81194	-0.229881	0.470487	-0.140695	0.728839	-0.254657	0.284483	0.00253565	0.990897	-0.0335192	0.935111
FBgn0012034	CG9390	3L	3454	17086	24340	17826	17885	27800	24115	17304	23763	22337	18807	21080	18355	-0.333373	0.168462	0.203704	0.509722	0.557876	4.42961e-08	-0.0786379	0.936703	0.209956	0.825775	-0.175104	0.652041	-0.367046	0.195155	0.154794	0.534677	-0.375317	0.0461219	-0.0814065	0.927587	-0.0754335	0.994439	-0.00885319	0.993618	-0.174778	0.653064	0.154366	0.546354	-0.290069	0.371379
FBgn0012036	CG3752	2L	2070	21141	25484	26082	24655	16376	18553	23612	25021	18613	20559	23902	22797	-0.0134051	0.964542	-0.498339	0.0211651	-0.492239	0.00048198	-0.0211189	0.983725	-0.00805778	0.998294	-0.421377	0.0497944	0.0795935	0.889898	-0.0916114	0.751411	0.359416	0.0874523	-0.395929	0.0297923	-0.0829285	0.974662	0.297515	0.0977845	-0.108519	0.740106	-0.417165	2.67479e-05	0.471553	0.0191895
FBgn0012037	CG8827	2L	2062	42	45	94	85	112	114	99	171	76	264	201	73	0.752991	0.0505906	1.09937	0.00199525	0.322752	0.401808	0.973116	0.00314027	0.342209	0.599696	1.01202	0.0523305	0.218048	0.829642	0.273303	0.596682	0.125655	0.942436	0.0881618	0.948302	-0.00443529	0.996705	-0.0699842	0.957412	1.08515	0.0161604	0.44957	0.426634	0.226772	0.740234
FBgn0012051	CG7563	2R	2934	577	627	586	617	793	779	649	637	842	809	656	648	-0.130644	0.618196	0.268655	0.262182	0.402564	0.0137621	0.00994561	0.991676	0.128557	0.980694	0.251819	0.45136	-0.00213574	0.997952	0.124351	0.76459	-0.257939	0.377818	0.232871	0.638095	-0.00990578	0.996169	-0.248127	0.615381	0.000347504	0.999257	0.379934	0.133268	-0.255465	0.341305
FBgn0012058	CG8610	3L	3713	974	1052	1028	1052	1192	1105	1053	1130	1098	1412	1214	1160	-0.0938198	0.701381	0.0717102	0.796695	0.167381	0.335923	0.0219869	0.983004	0.108325	0.992359	0.108708	0.763358	0.0426175	0.958641	0.196474	0.398875	0.0284037	0.981149	0.0837873	0.91202	0.0800746	0.980613	-0.0153116	0.990294	0.109292	0.731038	0.202457	0.447628	-0.0482897	0.917941
FBgn0013263	CG33261	3L	4441	1611	1467	1839	1858	2284	1860	1876	1661	2135	2099	1983	1825	0.127702	0.525788	0.309636	0.141208	0.185208	0.28567	0.106756	0.869152	-0.0111532	0.998294	0.263692	0.309442	-0.0356893	0.96169	0.0610718	0.903936	-0.121865	0.848385	0.148145	0.766806	0.0681473	0.994439	-0.0886723	0.902436	0.186564	0.473554	0.142336	0.534288	-0.193819	0.535119
FBgn0013269	CG6226	3R	1299	690	668	595	542	545	622	575	576	571	1546	670	751	-0.376293	0.0495149	-0.305964	0.235264	0.0673324	0.825823	-0.289012	0.372121	0.0597483	0.998294	0.337747	0.527194	0.490255	0.388809	0.303029	0.177992	0.225131	0.624181	0.501017	0.417533	0.238654	0.653268	-0.292029	0.730261	-0.0463466	0.905318	0.604106	0.164658	-0.00190288	0.997505
FBgn0013272	CG5820	2R	4422	47753	46982	59807	57831	57077	49325	58425	54709	52834	49700	52767	51406	0.175356	0.224467	0.0579671	0.806232	-0.116529	0.424216	0.161048	0.68637	-0.00430243	0.998294	-0.0654823	0.824753	-0.115604	0.795312	-0.145677	0.404788	-0.0424402	0.965006	-0.224979	0.500224	-0.139091	0.844692	0.0717531	0.91459	0.0224685	0.948848	-0.236889	0.152122	0.108406	0.729287
FBgn0013275	CG31366	3R	2382	1253	11655	1307	1291	5389	12902	676	3717	596	270	2037	1492	-0.601001	0.235841	0.110519	0.88427	1.67743	9.29117e-05	-0.153943	0.79483	0.0868545	0.998294	-0.681152	0.147459	-0.957315	0.00408664	0.393144	0.0804925	-0.68111	0.018249	-0.41415	0.423226	-0.050396	0.994746	1.22927	3.3184e-05	-0.46544	0.412236	-1.20821	0.000389329	-0.510117	0.359157
FBgn0013276	CG18743	3R	2375	764	6873	739	755	4897	12398	354	2163	632	284	1806	1547	-0.619474	0.220991	0.2899	0.657037	1.97457	3.05401e-06	-0.140998	0.80643	0.079382	0.998294	-0.604416	0.216702	-0.889372	0.00848888	1.06356	2.58068e-15	-0.676612	0.0192449	-0.251282	0.691762	0.0502648	0.994746	1.16082	0.000110035	-0.327067	0.611696	-0.532124	0.245518	-0.612024	0.210722
FBgn0013277	CG31449	3R	2324	133	2269	224	205	2372	5221	85	525	81	53	466	426	-0.481265	0.318909	0.332957	0.574632	2.58235	7.91561e-11	-0.135059	0.793208	0.0554104	0.998294	-0.567609	0.211455	-1.74615	9.41514e-09	0.895105	2.5917e-07	-1.04187	6.38071e-05	-0.789759	0.0816419	0.0679004	0.994439	1.7862	4.79305e-12	-0.290119	0.622271	-1.21264	0.000784917	-0.779862	0.0815435
FBgn0013278	CG31359	3R	2347	79	1533	107	115	1455	3333	51	308	49	55	293	246	-0.502562	0.280692	0.300904	0.610379	2.53614	4.38799e-10	-0.139627	0.772712	0.0741184	0.998294	-0.543451	0.233016	-3.51897	3.43341e-40	0.969556	2.03773e-06	-0.976047	0.000174725	-0.630995	0.23105	0.0737963	0.994439	1.55395	5.79202e-09	-0.299458	0.601337	-0.7803	0.0725444	-0.789002	0.0762102
FBgn0013303	CG7641	3L	899	952	903	983	960	858	945	1025	834	983	1128	930	895	-0.0650782	0.79743	-0.137714	0.617297	-0.0732693	0.774061	-0.0720208	0.927867	-0.0108264	0.998294	-0.00188492	0.997019	0.131544	0.832869	-0.0615309	0.914525	-0.0023143	0.996908	0.0717789	0.930247	-0.0491395	0.994746	-0.134585	0.831473	-0.131625	0.66107	0.0638717	0.836622	0.0573452	0.918338
FBgn0013305	CG3798	2R	2118	5982	7427	5911	6248	9175	7290	4890	5222	5740	4977	6242	5990	-0.267237	0.194997	0.176589	0.524886	0.450767	0.000945535	-0.437313	0.0949542	-0.195442	0.574174	-0.471576	0.0779507	-0.619707	0.00432053	0.0298722	0.951334	-0.401126	0.0312163	-0.0108965	0.993936	0.222617	0.546332	0.218274	0.620557	-0.23662	0.392033	-0.214168	0.370699	-0.645524	0.000292632
FBgn0013323	CG13687	2L	1019	83	127	95	97	451	576	110	121	266	208	191	147	-0.226068	0.647686	1.97004	1.97768e-12	2.24801	4.09937e-24	0.0365228	0.980573	0.204843	0.963419	0.762283	0.101337	-0.89352	0.00557885	0.568048	0.0366203	-1.22553	1.6648e-08	0.662365	0.157967	0.36979	0.523575	-0.280338	0.740946	0.480505	0.277715	0.963875	0.0066667	-1.90156	1.08907e-15
FBgn0013325	CG7726	2R	1017	20453	17209	22544	23948	21074	19918	21325	16922	21346	20514	22626	22762	0.16681	0.386079	0.0168992	0.955551	-0.150797	0.256999	-0.054473	0.950762	-0.201188	0.738433	-0.027911	0.94244	-0.0397214	0.94329	-0.0112916	0.978776	0.122592	0.748616	0.0304753	0.97174	0.191806	0.795109	0.160879	0.667423	0.151115	0.571305	-0.192371	0.270243	-0.07559	0.859606
FBgn0013334	CG8884	3R	5972	2798	2348	3656	3360	3482	2868	3857	2884	3277	3320	3218	3183	0.305109	0.0843178	0.188344	0.443853	-0.115645	0.538977	0.266276	0.537421	-0.00591053	0.998294	0.166733	0.553667	-0.0148813	0.983233	-0.102546	0.739801	-0.00219762	0.996908	-0.116338	0.864874	-0.089357	0.982707	0.0117679	0.990294	0.19447	0.453337	-0.132773	0.52063	0.102453	0.828193
FBgn0013342	CG17248	3L	3570	89	99	176	262	47	28	172	182	59	48	101	114	0.952268	0.00233764	-1.19405	0.00228246	-2.09437	8.89868e-12	0.645565	0.0463655	-0.167866	0.992292	-0.684009	0.204115	0.183797	0.871792	-0.66084	0.0103751	0.858772	0.00279433	-1.17248	0.000858919	-0.561211	0.080923	0.534305	0.34161	0.0678388	0.916748	-1.44262	3.98767e-05	1.85407	5.99231e-10
FBgn0013343	CG31136	3R	4164	738	713	700	656	1123	1115	598	617	653	812	686	762	-0.224084	0.282085	0.503784	0.00726391	0.731686	1.41695e-07	-0.304768	0.330065	-0.0920053	0.998294	-0.16531	0.637577	-0.622032	0.00603398	0.10455	0.83352	-0.580363	0.00063985	0.144088	0.827959	0.194242	0.798317	0.0381457	0.970423	-0.111657	0.740011	0.0525086	0.890069	-0.818908	2.31959e-06
FBgn0013347	CG5163	3R	617	846	796	897	879	903	829	915	858	956	941	794	837	-0.0199847	0.946348	-0.0284521	0.92734	-0.00792303	0.977504	0.0250217	0.979006	0.0437016	0.998294	0.0232425	0.95966	0.0530066	0.94329	-0.0911229	0.846564	-0.0933711	0.899535	-0.00146706	0.999109	-0.135491	0.910624	-0.144033	0.827269	-0.118235	0.705862	0.0446982	0.895868	0.0534675	0.906111
FBgn0013432	CG3717	X	748	983	1073	696	700	482	507	858	874	714	689	715	623	-0.670651	3.5058e-05	-1.11435	1.67613e-09	-0.449708	0.00976552	-0.298642	0.338158	0.320527	0.154775	-0.686355	0.00480876	0.372716	0.340729	-0.0333627	0.961278	0.35951	0.192791	-0.360162	0.341231	-0.352368	0.233022	-0.0110242	0.993164	-0.697206	0.000565917	-0.037024	0.924088	0.782951	3.21847e-05
FBgn0013435	CG1362	2R	1251	222	226	224	218	295	281	204	267	278	313	277	251	-0.14381	0.677787	0.2421	0.43657	0.387407	0.102957	-0.00757895	0.994154	0.104392	0.998294	0.185362	0.690459	-0.0327026	0.975281	0.224712	0.578755	-0.118039	0.902791	0.172201	0.84969	0.101895	0.986488	-0.0795519	0.946698	0.11364	0.798564	0.317827	0.406335	-0.240462	0.598176
FBgn0013531	CG18780	2L	1037	111	116	86	106	92	112	128	122	149	162	99	84	-0.3301	0.415392	-0.227154	0.615755	0.10407	0.8419	0.0428931	0.974939	0.274828	0.79346	0.214271	0.708926	0.346907	0.615678	-0.0287639	0.976957	-0.116529	0.944529	0.152263	0.888921	-0.337947	0.633976	-0.435015	0.489249	-0.367423	0.412963	0.484896	0.285962	0.264936	0.631444
FBgn0013548	CG11295	2R	2653	69	92	150	155	113	92	153	89	142	658	85	165	0.689777	0.0385644	0.20723	0.677081	-0.491836	0.113615	0.325434	0.643176	-0.163677	0.99616	1.24416	0.0108903	0.797156	0.0625012	-0.15138	0.854952	0.155032	0.902791	0.692949	0.187977	0.00863076	0.996482	-0.539683	0.289083	0.405005	0.470645	0.698233	0.154745	0.21114	0.762865
FBgn0013563	CG6760	3L	3275	916	1110	1274	1279	1313	1289	1203	1061	1235	1250	1302	1387	0.190392	0.427224	0.244349	0.340717	0.0556646	0.794973	0.0656979	0.936881	-0.108057	0.992359	0.101099	0.790442	-0.129749	0.802521	0.0903215	0.825808	0.0268991	0.982024	0.0316838	0.97174	0.194122	0.771555	0.15386	0.775544	0.277401	0.314408	-0.0835476	0.767934	-0.172006	0.589683
FBgn0013576	CG32464	3R	8072	24540	22306	32480	30855	35588	28958	31073	27195	32896	28998	25772	27844	0.295789	0.033003	0.343332	0.0674181	0.0513043	0.799683	0.213007	0.546133	-0.0627899	0.998294	0.212324	0.424314	-0.116341	0.834997	-0.206486	0.172828	-0.257956	0.296131	-0.00715661	0.996562	-0.137341	0.885861	-0.142158	0.795005	0.0788066	0.783006	-0.0735764	0.786953	-0.117398	0.743722
FBgn0013672	CG34073	mitochondrion_genome	675	159434	109180	86501	85455	84836	92651	119087	61107	91580	96755	91608	98275	-0.73792	0.000171089	-0.660428	0.00545515	0.0763857	0.698284	-0.490708	0.252211	0.0782965	0.998294	-0.650588	0.00733964	0.00697711	0.989259	0.15821	0.352978	0.0702341	0.942406	-0.0268706	0.984709	0.0339593	0.996169	0.0655648	0.899795	-0.572892	0.017523	0.0802251	0.588714	0.0312315	0.970729
FBgn0013673	CG34072	mitochondrion_genome	162	16017	8629	6296	6014	5171	6065	11140	4542	6689	7165	6040	6223	-1.03544	4.58797e-05	-1.12048	8.28295e-05	-0.0946258	0.685679	-0.259441	0.770868	0.112228	0.998294	-0.901389	0.00281547	0.204925	0.58839	0.0165265	0.970127	0.0927909	0.916689	-0.199949	0.828234	-0.138327	0.978322	-0.112685	0.780405	-0.999971	0.000346996	0.117728	0.473537	0.281605	0.744012
FBgn0013674	CG34067	mitochondrion_genome	1536	599696	529779	501419	467209	475285	508969	535103	375521	506383	522263	519738	516867	-0.347427	0.0151053	-0.291744	0.147658	0.0539168	0.793862	-0.342315	0.338158	-0.0317459	0.998294	-0.309052	0.114953	-0.0126851	0.984166	0.11528	0.6033	0.0506868	0.95925	0.0692566	0.93047	0.132219	0.957537	0.0647008	0.899128	-0.229602	0.270087	0.0371204	0.856068	-0.0885268	0.864614
FBgn0013675	CG34069	mitochondrion_genome	685	233879	134726	157738	150907	130220	145028	194339	90502	148970	144164	152642	158756	-0.358044	0.225801	-0.479942	0.125167	-0.129203	0.485824	-0.314004	0.650619	-0.0427177	0.998294	-0.460028	0.175349	0.0140346	0.984397	0.0341292	0.932848	0.143198	0.773654	-0.040358	0.975436	0.068478	0.994746	0.133602	0.743397	-0.320647	0.387687	-0.118042	0.520321	0.0529066	0.951891
FBgn0013676	CG34074	mitochondrion_genome	789	315764	281756	287754	274013	253196	286795	298508	236912	288352	292226	299743	301245	-0.217981	0.153035	-0.238474	0.300341	-0.023095	0.929019	-0.217776	0.607685	-0.0161338	0.998294	-0.21807	0.311451	0.0251792	0.971787	0.11524	0.570987	0.120813	0.844994	0.0167474	0.985511	0.120955	0.94518	0.100933	0.810708	-0.101662	0.701274	-0.000756173	0.996932	0.00357481	0.992937
FBgn0013678	CG34090	mitochondrion_genome	1137	362208	281156	357032	334864	266303	291192	422365	208034	346202	357361	366098	351908	-0.0264736	0.932069	-0.29488	0.227929	-0.272907	0.0632188	-0.0862521	0.937881	-0.0562144	0.998294	-0.0518558	0.885214	0.243878	0.362791	0.0728852	0.830804	0.315754	0.126125	0.0491576	0.966749	0.111767	0.984777	0.082027	0.856999	0.0445208	0.906861	-0.0243052	0.903465	0.16402	0.800614
FBgn0013679	CG34092	mitochondrion_genome	939	97896	68647	66768	62277	57616	65691	76169	41776	61976	75073	71118	72167	-0.476942	0.021925	-0.504138	0.0446708	-0.0312342	0.902222	-0.445269	0.303525	-0.0566854	0.998294	-0.439867	0.0983848	0.06414	0.920806	0.165896	0.318169	0.176633	0.673934	0.0939449	0.924603	0.186814	0.918373	0.118546	0.780405	-0.308843	0.280066	0.031651	0.885624	-0.0443216	0.95624
FBgn0013680	CG34063	mitochondrion_genome	1026	25775	11902	13102	12297	10240	10463	18335	6723	12946	13112	12340	12263	-0.491385	0.375367	-0.860845	0.00890896	-0.259504	0.0453832	-0.209576	0.827686	0.00655337	0.998294	-0.611728	0.112147	0.243562	0.325631	-0.02177	0.961278	0.214691	0.371838	-0.0155956	0.996197	-0.0160502	0.996169	-0.025513	0.969752	-0.627164	0.0837139	-0.0110724	0.960767	0.166104	0.866662
FBgn0013681	CG34076	mitochondrion_genome	354	10493	4204	7143	6477	3671	4860	8143	2332	4350	5345	5769	6652	-0.148832	0.849929	-0.559556	0.380844	-0.607961	0.001401	-0.121034	0.904221	-0.0572295	0.998294	-0.476151	0.446173	0.0859509	0.916435	-0.101713	0.789486	0.43258	0.107218	-0.0681841	0.959591	0.0501452	0.994746	0.383758	0.100249	-0.22004	0.783006	-0.527672	0.000115148	0.125136	0.906369
FBgn0013683	CG34086	mitochondrion_genome	291	11558	4896	6038	5030	4127	4466	9817	2851	4803	4778	4715	4622	-0.456916	0.444885	-0.715045	0.208569	-0.322613	0.0602843	-0.10174	0.921848	0.04172	0.998294	-0.607028	0.298562	0.0754518	0.902955	-0.202944	0.394997	0.0912228	0.894588	-0.170048	0.878014	-0.113966	0.980613	0.0172155	0.981893	-0.597378	0.314408	-0.244742	0.240621	0.256443	0.77248
FBgn0013684	CG34083	mitochondrion_genome	1717	154553	112295	114382	107449	93456	101891	135350	83009	111197	122028	122070	114549	-0.382194	0.0618923	-0.524528	0.0232644	-0.147701	0.393465	-0.299151	0.577726	0.0202132	0.998294	-0.358503	0.168632	0.166943	0.608339	0.110213	0.670939	0.234302	0.394575	-0.00391713	0.997908	0.0684501	0.994746	0.0757166	0.879389	-0.269141	0.347775	0.0208829	0.911742	0.158644	0.765524
FBgn0013685	CG34089	mitochondrion_genome	525	3042	1300	1617	1433	937	975	2476	998	1362	1356	1448	1383	-0.423207	0.485928	-0.895799	0.0915748	-0.623666	2.16117e-05	-0.114771	0.921791	0.0631779	0.998294	-0.706135	0.0859103	0.392502	0.162823	-0.0769145	0.875743	0.494406	0.00457853	-0.312292	0.684336	-0.111119	0.990049	0.103846	0.87872	-0.613372	0.121207	-0.203161	0.412525	0.508104	0.444341
FBgn0013717	CG4166	3L	2989	296	263	293	321	228	165	287	315	242	568	272	198	0.00201467	0.99547	-0.575096	0.0465954	-0.575102	0.0207148	0.0214049	0.987326	0.0189317	0.998294	0.25342	0.662695	0.584691	0.261486	-0.272453	0.498019	0.178711	0.85212	0.199208	0.844252	-0.295788	0.684795	-0.38646	0.585843	-0.327874	0.390528	0.236966	0.676287	0.578617	0.0509949
FBgn0013718	CG33991	3L	3533	2276	2183	3353	3600	4056	5129	2925	2711	3106	3997	3277	4531	0.495936	0.000285771	0.901404	1.12558e-05	0.419413	0.0286917	0.235087	0.446922	-0.228796	0.389198	0.457584	0.0334731	-0.406353	0.211391	0.16188	0.704694	-0.210017	0.745691	0.209228	0.604574	0.367798	0.291255	0.168497	0.811881	0.652188	0.00402528	-0.0247044	0.933963	-0.644079	0.00374027
FBgn0013720	CG14779	X	1399	189	163	192	170	217	195	163	232	205	314	202	191	-0.0853977	0.84716	0.112261	0.781167	0.198789	0.541965	0.066308	0.959682	0.11894	0.998294	0.300702	0.550016	0.181253	0.847369	0.108788	0.8865	-0.0671825	0.966918	0.19515	0.840314	-0.0292688	0.996169	-0.227007	0.806251	0.0418744	0.944449	0.366451	0.418681	-0.0312864	0.969714
FBgn0013726	CG8705	2R	3027	812	801	1156	1266	1299	977	938	1155	904	1540	1148	1098	0.438861	0.0086734	0.369322	0.114975	-0.0639375	0.818658	0.258597	0.538946	-0.132068	0.991776	0.355769	0.34598	0.0141053	0.988682	-0.0783068	0.872958	-0.0271067	0.984855	0.0856503	0.93327	0.0596246	0.994746	-0.0396609	0.97464	0.349277	0.0992953	-0.0464132	0.924195	-0.0854778	0.869593
FBgn0013733	CG18076	2R	27842	12620	8556	13482	11589	18830	17886	12775	8984	13569	9993	13682	12154	0.106178	0.748745	0.655787	0.00457171	0.567405	3.39019e-06	-0.0354852	0.977386	-0.123854	0.998294	-0.0152988	0.982031	-0.618124	0.0156484	0.0611369	0.914525	-0.48356	0.00144514	0.0227935	0.985901	0.181317	0.885861	0.151545	0.847016	0.164623	0.669746	-0.116202	0.756909	-0.684554	0.00210239
FBgn0013746	CG9556	2L	3172	777	866	998	1058	1023	964	893	1013	1028	1115	1054	986	0.182226	0.419415	0.161532	0.529332	-0.0202066	0.938796	0.116101	0.876004	-0.0491972	0.998294	0.183633	0.56489	0.0303319	0.967175	0.010719	0.982578	0.0192485	0.990136	0.059326	0.94024	0.0581199	0.994439	-0.0114479	0.992539	0.188171	0.526096	0.00852448	0.978244	-0.0352888	0.945396
FBgn0013749	CG11027	4	930	2439	2233	2710	2688	2133	2253	2414	1990	2146	2321	2712	2696	0.0732147	0.733665	-0.187982	0.415427	-0.262217	0.0779525	-0.152432	0.794636	-0.213215	0.650897	-0.241102	0.309878	-0.0482342	0.941187	0.0242166	0.961131	0.258908	0.295343	-0.0740645	0.915423	0.236292	0.619181	0.312281	0.165666	0.0945277	0.740268	-0.314707	0.0327754	0.0227725	0.967281
FBgn0013750	CG8156	2R	1939	4117	4056	3973	3893	3751	3736	3954	3861	3819	4029	3681	3780	-0.185778	0.230766	-0.22552	0.243297	-0.0405646	0.834456	-0.137431	0.774452	0.0394065	0.998294	-0.236418	0.274231	-0.00784679	0.988682	-0.0506584	0.908279	-0.0217127	0.984631	-0.0903691	0.856165	-0.090797	0.963688	-0.0149933	0.983809	-0.238295	0.235193	-0.0518275	0.807874	0.0795505	0.817539
FBgn0013753	CG7959	3L	1242	38	46	64	56	55	54	60	35	70	174	44	65	0.301105	0.575188	0.219443	0.708602	-0.0890695	0.882087	0.0495487	0.976339	-0.124596	0.998294	0.805811	0.142978	0.489618	0.420137	-0.0586027	NA	-0.0101217	0.995323	0.551175	NA	0.0809895	0.994746	-0.416101	0.524057	0.195029	0.785369	0.534749	0.310947	-0.131336	0.884893
FBgn0013756	CG8274	2R	7780	2136	1933	2316	2110	2084	1684	2230	2266	2200	3385	2022	1835	-0.0119399	0.965212	-0.212975	0.362932	-0.201487	0.26322	0.0567204	0.93545	0.0677245	0.998294	0.239902	0.477607	0.418887	0.243228	-0.16067	0.560689	0.0182764	0.991259	0.174773	0.777286	-0.228187	0.58317	-0.389751	0.349515	-0.183003	0.486648	0.251598	0.406335	0.267815	0.279076
FBgn0013759	CG6703	3R	6544	2495	2451	2810	2577	2600	2395	2769	2573	2701	2709	2289	2463	-0.010721	0.966703	-0.090121	0.696577	-0.0792316	0.669148	0.0254856	0.976339	0.0359111	0.998294	-0.0527845	0.871973	0.0394986	0.949374	-0.147076	0.565644	-0.082141	0.901775	-0.0760273	0.898543	-0.182495	0.754888	-0.121926	0.815442	-0.166173	0.501739	-0.0403794	0.88254	0.114686	0.719407
FBgn0013762	CG8203	2R	1604	624	559	689	643	741	676	696	677	732	697	747	677	0.036235	0.910334	0.148477	0.579461	0.113643	0.612215	0.118484	0.863785	0.0833269	0.998294	0.0835513	0.847053	-0.0523516	0.949836	0.106116	0.83352	-0.00788105	0.995323	-0.036092	0.970411	0.0191006	0.996169	0.0425718	0.968684	0.146744	0.659673	0.050735	0.895647	-0.0217657	0.967281
FBgn0013763	CG5210	2R	1811	184	105	276	137	194	290	142	135	55	768	99	214	0.309651	0.553735	0.560475	0.185242	0.222019	0.663442	-0.0994371	0.929811	-0.277183	0.815731	0.256928	0.653083	0.0746212	0.930988	-0.176005	0.814961	-0.364051	0.51539	0.180874	0.777596	0.0813083	0.994746	-0.115835	0.854125	0.00315837	0.997362	0.141506	0.780139	-0.675204	0.056026
FBgn0013764	CG3924	2R	2156	903	803	853	872	831	853	821	871	840	1125	850	878	-0.113581	0.640013	-0.117688	0.67086	-0.00415174	0.987938	-0.0842507	0.911343	0.0214846	0.998294	0.0100962	0.986889	0.121868	0.871792	0.0230824	0.96896	0.0165196	0.99258	0.0939427	0.904678	-0.00124751	0.998781	-0.104526	0.905218	-0.0906348	0.788062	0.121076	0.721483	0.025976	0.961248
FBgn0013765	CG4832	2R	5012	176	159	277	283	260	233	192	167	212	583	223	291	0.567185	0.0234832	0.421166	0.156887	-0.147542	0.622808	0.0133774	0.991676	-0.450644	0.104172	0.753306	0.130088	0.347082	0.633228	-0.0792	0.926612	0.0341318	0.984855	0.603827	0.298091	0.37042	0.456828	-0.281029	0.754985	0.454469	0.181396	0.291385	0.606337	-0.395192	0.233438
FBgn0013770	CG6692	2R	1662	11146	9775	10844	11582	11463	9523	11404	11068	11928	11973	9836	11142	-0.0320632	0.896937	-0.100959	0.68547	-0.068939	0.72121	0.0192904	0.983513	0.050699	0.998294	0.00837429	0.984348	0.109982	0.810067	-0.0689236	0.873572	-0.0137696	0.993536	-0.0103248	0.99129	-0.11962	0.917254	-0.124395	0.79537	-0.105256	0.72495	0.0426271	0.852974	0.118964	0.709853
FBgn0013771	CG10246	2R	1964	2991	2666	7002	5981	6357	5723	5820	4690	5412	5621	5731	6154	1.03442	4.37899e-13	0.962476	1.31192e-10	-0.0745445	0.715713	0.726997	0.000174094	-0.216937	0.712182	0.749759	8.37701e-06	-0.194562	0.483431	-0.0962308	0.81236	-0.0370093	0.973819	-0.027317	0.974004	0.129856	0.931343	0.154449	0.675284	0.925326	1.49702e-09	-0.273896	0.123546	-0.170334	0.605731
FBgn0013772	CG10248	2R	1781	1880	2640	27285	35407	330	514	9849	12763	571	673	11197	10885	3.43438	6.0901e-69	-2.2877	6.55671e-18	-4.76112	1.11094e-48	1.85566	7.23442e-19	-1.13319	1.73271e-11	-1.8775	1.43652e-16	0.359118	0.53314	-1.31389	4.61972e-22	3.67535	3.87039e-89	-3.84977	7.4816e-107	-0.0576163	0.994746	3.93421	2.40072e-232	2.0304	1.75762e-24	-5.39864	2.63634e-285	4.19864	1.3499e-72
FBgn0013773	CG10240	2R	1951	1791	1899	4991	4806	3138	2745	3507	3426	2979	3099	3771	4099	1.24581	4.51723e-24	0.549017	0.00113356	-0.696609	1.06052e-10	0.760958	4.11318e-06	-0.413684	0.00169319	0.511977	0.00953391	-0.0245522	0.971091	-0.276223	0.0456474	0.373213	0.0285024	-0.274616	0.322899	0.138953	0.871329	0.401399	0.028263	0.94323	1.73961e-09	-0.719298	2.16517e-10	0.251185	0.244263
FBgn0013799	CG8567	3L	3588	590	655	702	737	743	714	665	672	659	845	627	765	0.0713126	0.80887	0.115874	0.68547	0.0454956	0.862629	0.0168826	0.989339	-0.0472367	0.998294	0.0732787	0.870417	-0.0313591	0.972774	-0.0222876	0.975036	-0.0729389	0.954265	0.0548484	0.950444	0.0224081	0.996169	-0.0415721	0.970423	0.0429337	0.925664	0.00705181	0.983309	-0.0972656	0.809876
FBgn0013811	CG15804	3L	12090	155	119	223	222	167	232	228	149	154	127	143	191	0.517618	0.0809402	0.397649	0.326254	-0.108931	0.798818	0.276464	0.703063	-0.12563	0.998294	-0.109239	0.877186	-0.379703	0.56463	-0.289208	0.469311	-0.193512	0.844994	-0.341695	0.650586	-0.13837	0.978322	0.182694	0.866662	0.151028	0.784337	-0.560304	0.160633	-0.059058	0.945396
FBgn0013954	CG11001	2R	633	6119	5965	5237	5489	5266	5531	4960	5600	5235	5465	5177	5884	-0.300117	0.0288802	-0.258664	0.186377	0.0398956	0.853273	-0.253372	0.417419	0.0270547	0.998294	-0.349619	0.0614962	-0.0849439	0.873571	0.0621766	0.894812	0.0136181	0.993536	-0.0776863	0.896865	0.030664	0.995535	0.0971126	0.857084	-0.23354	0.295952	-0.0517518	0.807874	-0.0112251	0.98243
FBgn0013981	CG3379	3R	753	11872	8803	10479	11088	9791	10197	11378	8897	10870	9852	9573	10107	-0.0680353	0.823191	-0.143808	0.623517	-0.0771545	0.677721	-0.0953531	0.913182	-0.0332135	0.998294	-0.164237	0.628173	-0.0187929	0.979848	-0.10375	0.699689	-0.0387642	0.973785	-0.0574312	0.944557	-0.0640607	0.994439	-0.0202476	0.981893	-0.173281	0.594158	-0.0983268	0.696257	0.0364671	0.945464
FBgn0013983	CG5576	2R	1518	423	430	254	234	573	568	360	340	459	477	455	384	-0.892222	6.45907e-06	0.301852	0.215482	1.19914	1.45952e-12	-0.323444	0.352198	0.45835	0.0584677	-0.0474593	0.927172	-0.314793	0.456337	0.656126	0.000845085	-0.393912	0.138265	0.272557	0.613095	0.192273	0.862266	-0.0812853	0.941039	-0.129153	0.740268	0.79229	0.0017439	-0.643182	0.00203262
FBgn0013987	CG3086	X	2060	2425	2696	2223	2270	2223	2106	2277	2297	2348	2381	2050	2096	-0.315206	0.0564945	-0.338987	0.0790869	-0.0244943	0.908158	-0.225424	0.531817	0.0713727	0.998294	-0.28681	0.24864	0.0501824	0.93923	-0.0875511	0.799795	-0.0738301	0.922527	-0.0490089	0.940365	-0.159024	0.815557	-0.124197	0.810902	-0.403926	0.0385656	0.0244381	0.927578	0.0977487	0.769015
FBgn0013995	CG5685	3R	7361	7706	7432	4396	4707	2934	3031	4878	6459	3897	4309	4580	3420	-0.850355	1.06451e-12	-1.40997	2.20252e-22	-0.566971	3.84177e-06	-0.436803	0.123109	0.307449	0.361686	-1.03815	2.39915e-13	0.360075	0.0786767	-0.140257	0.760695	0.346325	0.245505	-0.512648	0.0681763	-0.427835	0.226109	0.0203337	0.986018	-0.976412	8.74227e-07	-0.196041	0.223004	0.884068	1.90376e-05
FBgn0013997	CG6827	3L	4940	588	469	660	573	1032	762	626	453	709	789	627	616	0.0848852	0.801056	0.61719	0.0114753	0.537691	0.00606673	-0.0446954	0.96999	-0.109227	0.998294	0.291005	0.394217	-0.28816	0.525866	0.0305802	0.964345	-0.462438	0.050964	0.313983	0.554669	0.142169	0.956978	-0.184383	0.75621	0.114502	0.765888	0.21272	0.477972	-0.6429	0.0170117
FBgn0014002	CG6988	3L	2328	12618	12889	11192	11468	13400	12661	10980	13146	12477	13070	11995	12703	-0.29961	0.0242333	-0.07359	0.745424	0.227268	0.0455397	-0.146743	0.801812	0.126523	0.978811	-0.178312	0.402872	-0.0994036	0.786321	0.139934	0.470446	-0.0890143	0.874392	-0.0185918	0.98337	0.0010627	0.998781	0.00753448	0.992539	-0.156237	0.502303	0.1211	0.434997	-0.0839399	0.837305
FBgn0014006	CG4720	3R	5168	1179	931	1448	1510	1214	1102	1411	1391	1183	1558	1129	1188	0.341503	0.0920061	0.0277401	0.937205	-0.318029	0.0246514	0.291217	0.404071	-0.0237759	0.998294	0.172052	0.637409	0.145755	0.796127	-0.304709	0.0541132	-0.0143745	0.993536	-0.126858	0.836002	-0.277329	0.341709	-0.157402	0.810719	0.021627	0.964805	-0.157616	0.567528	0.285572	0.194394
FBgn0014007	CG10975	3L	5168	1044	878	920	952	1359	1179	977	844	1254	1941	1080	940	-0.164949	0.48375	0.283449	0.221197	0.454072	0.00129213	-0.142552	0.827819	0.00994766	0.998294	0.488167	0.125354	0.21182	0.709348	0.118971	0.784968	-0.306167	0.248337	0.594996	0.0712256	0.103554	0.975223	-0.480231	0.203088	-0.0385366	0.928651	0.642474	0.00890375	-0.432853	0.0432773
FBgn0014009	CG3269	2R	1712	3619	3427	4228	4088	4085	3485	4236	3862	4354	3971	3853	3947	0.10321	0.574572	-0.00464624	0.98788	-0.107294	0.520698	0.108497	0.850884	0.0121448	0.998294	0.0570353	0.871541	0.0633355	0.927858	-0.0659423	0.860247	0.0262276	0.981149	-0.0520729	0.944557	-0.078033	0.978322	-0.0376275	0.961648	0.0319923	0.923233	-0.041463	0.888375	0.116328	0.728705
FBgn0014010	CG3664	2L	2491	11924	10641	13248	13157	15862	14766	13751	11631	14136	13305	13752	13872	0.0915628	0.635084	0.327055	0.0593356	0.239219	0.0287426	0.0786368	0.913123	-0.0052712	0.998294	0.0967799	0.739026	-0.216566	0.460608	0.0843099	0.751541	-0.1562	0.57977	0.0145702	0.986767	0.0829326	0.978322	0.0591177	0.932419	0.17328	0.45334	0.00937905	0.970726	-0.239542	0.325253
FBgn0014011	CG8556	3L	2429	1915	2661	1973	1855	2817	2401	1995	2127	1968	1994	2152	2131	-0.373776	0.117514	0.074361	0.840199	0.463065	0.000306694	-0.20164	0.742841	0.143586	0.898384	-0.364587	0.251663	-0.436282	0.0391826	0.173087	0.41648	-0.275648	0.214233	-0.146573	0.763887	0.0214835	0.996169	0.155939	0.731555	-0.19835	0.585004	0.00114861	0.99633	-0.301981	0.170849
FBgn0014018	CG11992	3R	3499	5467	7793	4444	4661	4885	4954	4932	5964	4610	4491	3854	5000	-0.643551	0.00250561	-0.508608	0.0432422	0.139575	0.375379	-0.308161	0.499567	0.272251	0.366012	-0.674117	0.0105259	-0.175173	0.615678	-0.0162748	0.979186	-0.150596	0.817656	-0.328889	0.339517	-0.279438	0.606777	0.0122234	0.992539	-0.644071	0.0171303	-0.0462892	0.858665	0.159931	0.653087
FBgn0014020	CG8416	2R	2028	14468	13212	12834	13230	16130	14969	13968	13576	14720	13669	13932	14070	-0.216022	0.146883	0.0607092	0.798443	0.279177	0.0099728	-0.0834392	0.891725	0.122719	0.887855	-0.138729	0.609344	-0.190073	0.561564	0.120729	0.556221	-0.158402	0.567177	-0.05029	0.937652	-0.00692722	0.996482	0.0311866	0.967938	-0.093852	0.724328	0.0752581	0.756703	-0.148137	0.566461
FBgn0014022	CG8161	3R	1444	175	110	175	158	203	137	170	149	210	213	158	149	0.0819858	0.877773	0.126131	0.809283	0.0466874	0.924136	0.0602006	0.966157	-0.00742221	0.998294	0.30776	0.571474	0.174497	0.868021	-0.0700457	0.936036	-0.113441	0.941807	0.23201	0.772159	-0.0654265	0.994746	-0.285713	0.703894	-0.00276281	0.997108	0.24401	0.597389	-0.0554525	0.944318
FBgn0014023	CG9378	3R	905	559	581	575	595	415	479	510	519	474	519	526	509	-0.0933413	0.734916	-0.430265	0.0844657	-0.338789	0.119473	-0.20589	0.6696	-0.114617	0.99616	-0.357434	0.258409	0.0600701	0.949259	-0.136296	0.739525	0.161122	0.825471	-0.135192	0.850707	-0.0200612	0.996169	0.100475	0.918098	-0.24119	0.390528	-0.26597	0.358683	0.205032	0.601437
FBgn0014024	CG3312	X	3323	722	639	827	833	925	786	806	860	884	1040	881	813	0.148044	0.530588	0.214056	0.399005	0.0679757	0.777422	0.187755	0.716897	0.0505583	0.998294	0.290741	0.331506	0.0835284	0.915645	0.0473504	0.936857	-0.0257786	0.984855	0.0923605	0.896905	-0.00653439	0.996482	-0.108497	0.888513	0.193241	0.513216	0.150919	0.578908	-0.0129731	0.980447
FBgn0014026	CG3314	X	1130	41301	42754	46207	46581	45518	43212	43776	41816	46949	45497	46428	46454	0.00801915	0.97172	-0.0275062	0.913648	-0.0352602	0.83274	-0.0537058	0.932818	-0.0605489	0.998294	-0.0446145	0.885817	-0.012629	0.983233	0.0233965	0.957521	0.0461135	0.956629	0.011915	0.988424	0.0808624	0.974662	0.0579586	0.92945	0.0287993	0.928504	-0.0508736	0.81645	-0.0294165	0.941859
FBgn0014028	CG3283	2R	1219	7878	8511	6520	6739	5331	5547	6732	7553	5949	5670	5444	6295	-0.431018	0.00172532	-0.675878	4.18112e-05	-0.249695	0.0681131	-0.256294	0.429047	0.144816	0.887855	-0.651452	0.000412703	0.0197687	0.976888	-0.142319	0.596838	0.0818882	0.924501	-0.36804	0.179275	-0.281216	0.411045	0.0625188	0.935461	-0.573401	0.00154961	-0.229216	0.200375	0.39506	0.0534221
FBgn0014029	CG4173	3R	1688	1530	1613	1048	1137	1437	1256	1112	1225	1187	1306	1046	1142	-0.640164	2.25147e-05	-0.321458	0.104878	0.319963	0.0377393	-0.461981	0.0420812	0.130855	0.978811	-0.497594	0.0211616	-0.171674	0.683313	0.0222587	0.970016	-0.285858	0.244049	-0.00946968	0.995413	-0.112907	0.957884	-0.117868	0.853628	-0.611949	0.00071857	0.13236	0.609304	-0.171605	0.596695
FBgn0014031	CG3926	X	1410	11946	11326	13396	14108	11194	10859	15156	13695	13294	12250	11023	14170	0.105404	0.553656	-0.17859	0.358851	-0.285026	0.013324	0.21014	0.521901	0.110532	0.978285	-0.0448347	0.89499	0.131846	0.753439	-0.0935088	0.856543	0.153819	0.789286	-0.253286	0.462459	-0.197453	0.812622	0.0282835	0.975894	0.000249241	0.999257	-0.146494	0.490652	0.394032	0.0236773
FBgn0014032	CG12117	X	1143	290	347	1607	1688	846	755	1198	1231	544	690	1296	1272	2.14622	3.55581e-40	1.16413	6.88874e-09	-0.989625	1.88924e-15	1.62208	4.01939e-19	-0.349549	0.0517981	0.683291	0.0277338	-0.400637	0.239096	-0.312273	0.0395146	0.605594	0.000102156	-0.972188	2.09271e-06	0.044236	0.994746	0.981052	1.93815e-07	1.79235	1.76183e-22	-1.38881	8.77557e-18	0.596836	0.000839529
FBgn0014037	CG32217	3L	6621	3800	3643	4361	4304	4668	4923	4057	3999	4009	4867	4234	4394	0.0838265	0.657045	0.25555	0.203213	0.174254	0.267707	0.0290398	0.970893	-0.0493489	0.998294	0.0611813	0.841101	-0.181089	0.612743	0.0158168	0.973079	-0.158678	0.69135	0.0318386	0.963305	0.0624744	0.987767	0.0188141	0.981893	0.0963648	0.720794	-0.019203	0.938568	-0.223117	0.366051
FBgn0014075	CG6850	3L	5316	3083	2991	3108	2800	2819	2781	2645	3170	2817	3357	3074	3057	-0.170081	0.345574	-0.216525	0.272898	-0.04639	0.826676	-0.130044	0.835701	0.0260388	0.998294	-0.160164	0.523041	0.0572901	0.925967	0.0714496	0.865754	0.104879	0.844994	-0.0185357	0.985073	0.0388439	0.994746	0.0471213	0.946911	-0.0973337	0.719866	0.00948023	0.971813	0.0725605	0.869593
FBgn0014092	CG4278	2L	1063	452	393	450	444	450	494	448	406	462	515	479	494	-0.0495886	0.883346	0.0551283	0.882171	0.105462	0.709139	-0.0588738	0.949059	-0.0121213	0.998294	0.0204816	0.970401	-0.0257269	0.979848	0.127129	0.784968	0.0202459	0.992248	0.0790523	0.930247	0.135817	0.932372	0.0446392	0.967033	0.0853695	0.8268	0.0700712	0.864158	-0.117629	0.803744
FBgn0014127	CG10726	2L	2908	139	123	177	172	216	160	203	146	236	650	201	201	0.255748	0.479931	0.374641	0.302031	0.120166	0.762128	0.25177	0.726653	0.0343332	0.998294	1.12138	0.0117696	0.655755	0.183512	0.176357	0.744384	0.0645475	0.973373	0.711229	0.160211	0.129376	0.978322	-0.547541	0.320958	0.455999	0.173223	0.849558	0.0469151	-0.0713121	0.923593
FBgn0014133	CG1822	X	8842	2218	2031	2389	2365	2629	2242	2561	2472	2616	3838	2277	2407	0.0278442	0.913021	0.0865627	0.734183	0.0601343	0.76354	0.148972	0.759286	0.12335	0.930009	0.380321	0.177973	0.286587	0.481017	0.00128223	0.999467	-0.0656377	0.944592	0.220474	0.657746	-0.123883	0.90911	-0.342287	0.392399	0.0262257	0.945448	0.355577	0.139647	0.0685966	0.857875
FBgn0014135	CG4608	3R	4295	655	914	785	745	520	673	756	1315	790	626	1185	761	-0.162598	0.617108	-0.45813	0.149508	-0.305138	0.221905	0.237305	0.768836	0.33334	0.539655	-0.287287	0.501957	0.138532	0.883018	0.286488	0.440183	0.503371	0.123254	-0.483126	0.384302	-0.0813719	0.994746	0.368967	0.543713	0.172965	0.730184	-0.135719	0.745999	0.694943	0.0442953
FBgn0014141	CG3937	3R	8392	7628	7052	9797	10327	10600	9583	8758	8392	7842	7873	7858	9450	0.315281	0.0234768	0.34452	0.0392947	0.0312685	0.869612	0.131567	0.793528	-0.165918	0.678978	-0.0826303	0.761161	-0.412443	0.0138992	-0.178877	0.482237	-0.216437	0.493007	-0.214003	0.486941	-0.0165966	0.996169	0.17809	0.688888	0.118814	0.697712	-0.39477	0.00184518	-0.205289	0.353857
FBgn0014163	CG4609	3L	3988	172	218	461	495	288	293	356	287	268	1210	324	370	1.08236	8.26904e-07	0.435888	0.158301	-0.656765	0.000418167	0.512667	0.137949	-0.415924	0.120387	1.10445	0.0226565	0.306965	0.635131	-0.373469	0.0985857	0.198252	0.746696	0.540795	0.405635	0.0644627	0.994746	-0.20973	0.790925	0.651827	0.0221594	0.180438	0.78143	0.15159	0.756682
FBgn0014184	CG16747	2R	1909	122400	128496	107699	103534	103872	114093	114820	91072	99458	100043	103640	110112	-0.375876	0.00353449	-0.296493	0.143186	0.0760985	0.705984	-0.333648	0.258598	0.0121567	0.998294	-0.499298	0.00304085	-0.19234	0.548743	0.0380631	0.928203	-0.0446967	0.971849	-0.133066	0.795621	0.0210297	0.996169	0.147214	0.672006	-0.335533	0.059913	-0.127827	0.425642	-0.061654	0.902035
FBgn0014189	CG7269	2L	2270	1960	1697	1966	2035	2262	2063	1907	1679	2135	2925	2107	2213	-0.0032506	0.989696	0.13202	0.585188	0.137529	0.388974	-0.100566	0.885744	-0.0954948	0.998294	0.258209	0.383079	0.130589	0.819582	0.124904	0.644409	-0.0167758	0.990136	0.348831	0.34468	0.21459	0.653268	-0.144833	0.822659	0.122552	0.678535	0.264904	0.264216	-0.237844	0.339813
FBgn0014269	CG18608	2R	1597	260	266	302	292	218	225	282	254	253	418	278	296	0.0387777	0.921441	-0.331109	0.270772	-0.369791	0.13057	-0.0482969	0.966157	-0.0768603	0.998294	0.127379	0.824115	0.370734	0.537656	-0.0221268	0.976957	0.291336	0.480397	0.157632	0.875273	0.0560153	0.994746	-0.108558	0.932627	0.0108181	0.986881	0.0917811	0.871799	0.269547	0.49101
FBgn0014340	CG3025	X	3014	171	158	257	259	288	196	240	192	242	363	236	186	0.480316	0.0681777	0.406838	0.240881	-0.0649874	0.877045	0.249498	0.696104	-0.153994	0.992292	0.57198	0.174712	0.174328	0.862398	-0.20496	0.678069	-0.151619	0.89097	0.280743	0.705137	-0.0475133	0.994746	-0.305732	0.685971	0.221331	0.619457	0.140647	0.78305	-0.119903	0.849503
FBgn0014366	CG2925	3R	1859	411	470	508	500	505	453	438	508	533	697	479	486	0.0564927	0.868529	0.0121758	0.975457	-0.0441384	0.879404	0.0167489	0.989825	-0.0322363	0.998294	0.260609	0.491644	0.239702	0.649338	-0.0352303	0.96055	-0.00486749	0.995364	0.228692	0.711996	-0.00295257	0.996705	-0.23831	0.698195	0.0152542	0.979127	0.210057	0.530721	0.00543085	0.991015
FBgn0014380	CG9366	3R	1205	4406	4540	2790	3276	4525	4217	4105	4333	4654	3982	3831	3650	-0.674918	6.36474e-06	-0.136639	0.51742	0.541838	5.43533e-05	-0.154557	0.73366	0.467054	0.00521425	-0.21767	0.453617	-0.0782917	0.915645	0.296889	0.095548	-0.224996	0.328787	-0.0561299	0.944557	-0.187776	0.71568	-0.138873	0.828342	-0.360559	0.0460436	0.436737	0.0522707	-0.0273644	0.950946
FBgn0014388	CG1921	3L	4280	618	865	594	597	498	619	630	657	525	424	457	561	-0.424624	0.0996478	-0.472991	0.126025	-0.0547158	0.875449	-0.24262	0.673304	0.142244	0.968146	-0.719118	0.0386455	-0.243586	0.717471	-0.174742	0.665435	-0.127051	0.897053	-0.445244	0.320136	-0.314514	0.442571	0.115067	0.923365	-0.602621	0.0363229	-0.325571	0.356299	0.203397	0.625842
FBgn0014391	CG9032	X	450	4290	2997	3283	3274	2963	2966	3500	2328	3390	3105	2959	3367	-0.270184	0.275789	-0.379778	0.143186	-0.113134	0.486509	-0.328328	0.498622	-0.0942903	0.998294	-0.318271	0.326796	0.0550555	0.93951	-0.0271739	0.961131	0.068307	0.944592	0.0530174	0.958292	0.0713383	0.994439	0.0129665	0.992263	-0.29474	0.344257	-0.0562413	0.848215	-0.00621363	0.990994
FBgn0014395	CG14620	X	1358	88	70	95	86	57	68	81	108	100	78	93	85	0.0542066	0.928662	-0.372837	0.439719	-0.422417	0.306096	0.123118	0.91813	0.0670804	0.998294	-0.00240067	0.998929	0.231446	0.812702	-0.000521543	0.999971	0.304346	0.640833	-0.105229	NA	-0.0772912	0.994746	0.0259604	0.987773	0.0501899	0.949312	-0.0435206	0.950332	0.492595	0.310791
FBgn0014396	CG3234	2L	5641	27172	832	1124	2912	7493	11286	3054	16366	12230	10248	541	12131	-0.38851	0.386776	-0.126006	0.848324	1.17436	0.0125094	-0.0376631	0.96065	0.184414	0.678978	-0.0742374	0.907254	0.151426	0.84993	0.0799482	0.809462	-0.0396113	0.971849	0.0233084	0.986164	-0.0357847	0.994746	-0.0618076	0.934992	-0.125134	0.808369	1.15863	0.00532141	0.0200205	0.986366
FBgn0014411	CG14804	X	2543	1839	1953	2129	2023	2029	1946	2182	2053	1999	2308	1932	1957	-0.00376373	0.988614	-0.0370923	0.895783	-0.0331188	0.876981	0.0691041	0.921791	0.0731381	0.998294	-0.00558632	0.991033	0.0351665	0.958011	-0.0669292	0.873071	-0.0453969	0.964094	-0.0745747	0.899384	-0.141022	0.870265	-0.0811921	0.902436	-0.0754621	0.808252	0.000171375	0.999633	0.108467	0.743722
FBgn0014417	CG13397	2L	2741	139	119	152	152	67	69	136	136	87	302	107	105	0.0937944	0.841726	-0.911885	0.00656454	-1.00028	0.000403345	-0.00461206	0.997197	-0.0765378	0.998294	0.237878	0.735694	0.612925	0.239096	-0.354677	0.320724	0.414192	0.34519	0.187292	0.870483	-0.286602	0.752992	-0.308602	0.701973	-0.348264	0.416728	0.153906	0.826598	0.870569	0.00644881
FBgn0014427	CG11899	3R	1176	1747	1900	1856	1894	1255	1272	1606	2264	1753	1732	1462	1734	-0.0921331	0.680681	-0.614278	0.000580005	-0.527207	4.16176e-05	0.00355361	0.997631	0.0788469	0.998294	-0.237787	0.377933	0.357847	0.192658	-0.18896	0.476341	0.285019	0.311517	-0.217929	0.717376	-0.249299	0.771555	-0.0628711	0.942032	-0.291551	0.242316	-0.147312	0.522019	0.58549	0.0238252
FBgn0014455	CG11654	X	2119	8530	7770	8991	9202	5709	5855	8356	9605	7269	7197	7682	7692	0.0246137	0.916416	-0.582841	0.000330161	-0.612138	2.81901e-08	0.0533545	0.944102	0.0307018	0.998294	-0.342679	0.0918047	0.234053	0.402703	-0.209968	0.121592	0.364618	0.024675	-0.383485	0.136937	-0.231382	0.582544	0.134822	0.745626	-0.191808	0.379751	-0.36868	0.00494278	0.626012	0.000480887
FBgn0014469	CG2060	2R	1880	23685	22132	35155	32719	24817	23776	34536	31442	27448	25702	24575	28382	0.425071	0.000854274	-0.0199336	0.939341	-0.446242	1.95952e-05	0.411144	0.0385915	0.00985009	0.998294	0.0314179	0.931105	0.0544799	0.927606	-0.311949	0.0354681	0.0979377	0.878179	-0.382911	0.105539	-0.315155	0.223739	0.0438002	0.954428	0.0918184	0.757319	-0.385571	0.00973764	0.44675	0.00599516
FBgn0014857	CG5825	2L	926	1190	1286	1087	1204	1080	1113	1149	1267	1059	1214	1155	1183	-0.238772	0.233492	-0.270233	0.230011	-0.0316319	0.906006	-0.106702	0.880704	0.112556	0.992359	-0.296306	0.271516	-0.0252924	0.974216	0.0474215	0.932848	0.0666065	0.950765	-0.175743	0.728569	-0.0709001	0.990325	0.0907286	0.902436	-0.189658	0.478974	-0.060754	0.849695	0.152296	0.666632
FBgn0014861	CG7538	3R	2898	47	53	59	46	37	30	31	78	57	904	39	62	-0.0514599	0.941816	-0.546356	0.289742	-0.472907	0.336136	0.0227849	0.989825	0.0374034	0.998294	0.517108	0.288067	0.312053	0.425769	-0.015642	NA	0.268648	0.741949	0.273832	0.559169	-0.0583103	0.994746	-0.226341	0.582748	-0.0763454	0.926744	0.405183	0.298421	0.461637	0.496825
FBgn0014863	CG1019	3R	3071	488	524	676	707	557	617	592	528	544	495	518	623	0.304092	0.142859	0.106218	0.74355	-0.196356	0.3903	0.0546082	0.953935	-0.216942	0.703121	-0.130914	0.760398	-0.21119	0.727602	-0.221384	0.47468	-0.0525077	0.973819	-0.175532	0.795621	-0.00385705	0.996482	0.152277	0.856999	0.0545866	0.900446	-0.417684	0.12812	-0.0468151	0.933868
FBgn0014868	CG9022	X	1513	1991	2205	1875	1854	2422	2407	1577	1876	1993	2242	2234	2593	-0.297056	0.0788858	0.0942525	0.716691	0.395019	0.00147123	-0.323665	0.31717	-0.0505143	0.998294	-0.167789	0.542191	-0.251331	0.368598	0.36221	0.0181159	-0.0174893	0.991259	0.172828	0.735383	0.390529	0.162546	0.225718	0.562042	0.0829874	0.810041	0.127525	0.536512	-0.437906	0.0441189
FBgn0014869	CG1721	3R	1136	6974	7152	6807	6844	6609	6489	6951	6878	6479	6703	6761	7064	-0.180338	0.2414	-0.209275	0.276393	-0.0295888	0.876465	-0.106139	0.846536	0.0658497	0.998294	-0.27622	0.171822	-0.062964	0.904285	0.0391028	0.928203	0.0560471	0.95088	-0.161635	0.636486	-0.0295515	0.994746	0.118542	0.77479	-0.141206	0.564169	-0.0974338	0.576803	0.0960745	0.762455
FBgn0014870	CG8912	2R	5687	1268	1382	1500	1321	1656	1627	1513	1212	1428	1409	1395	1432	-0.0433668	0.879965	0.197057	0.392418	0.242186	0.144326	-0.0399642	0.968984	0.000915187	0.999666	-0.0815623	0.8193	-0.262559	0.419942	0.0238486	0.968543	-0.215122	0.440662	-0.0357979	0.967591	0.0198635	0.996169	0.0455548	0.955557	-0.0207584	0.961356	-0.0372414	0.911361	-0.235296	0.444125
FBgn0014877	CG6155	2R	1065	1073	1355	893	984	1087	911	952	1085	1038	1136	933	819	-0.483711	0.0211107	-0.373709	0.133709	0.112399	0.618135	-0.291854	0.480715	0.146416	0.967482	-0.323851	0.297259	0.0434342	0.955613	-0.0675115	0.919173	-0.179427	0.723937	-0.00879395	0.996197	-0.215328	0.771555	-0.222545	0.655874	-0.550155	0.0231397	0.152195	0.569416	0.0504682	0.920014
FBgn0014879	CG4299	3R	1169	682	774	903	911	814	825	776	922	800	1229	982	899	0.17559	0.455629	0.0629545	0.845987	-0.112952	0.595974	0.121111	0.876579	-0.0361807	0.998294	0.252493	0.5164	0.185498	0.779529	0.0683994	0.904623	0.161236	0.756991	0.119123	0.89251	0.0994904	0.978322	-0.0330984	0.977141	0.241696	0.393727	0.0896302	0.834037	0.0681013	0.890978
FBgn0014903	CG14630	X	1358	30	33	43	23	37	40	27	26	49	42	33	37	-0.0469611	0.954468	0.142687	0.837269	0.177405	0.79016	-0.168552	NA	-0.0832273	0.998294	0.19466	0.799127	0.0707421	0.959201	0.0395251	NA	-0.0751651	0.973373	0.27844	NA	0.167153	0.970023	-0.119411	0.92945	0.0264527	0.981442	0.195205	0.774875	-0.35677	0.61923
FBgn0014906	CG3488	2L	2733	1400	2059	2898	3060	2063	2800	2584	2593	1799	2146	2299	2419	0.609171	0.00816014	0.360917	0.29712	-0.242465	0.340836	0.416258	0.242893	-0.138197	0.879558	-0.00313535	0.996387	-0.335736	0.420137	-0.294421	0.0360608	-0.0572969	0.973373	-0.464768	0.0286417	-0.151945	0.825593	0.293642	0.323445	0.305171	0.367629	-0.626692	4.20112e-06	0.0954651	0.857875
FBgn0014930	CG2846	3R	1210	694	671	673	705	720	784	672	636	739	667	748	804	-0.116212	0.637536	0.035865	0.916109	0.152276	0.508842	-0.130414	0.83455	-0.0204673	0.998294	-0.127576	0.745746	-0.147141	0.833811	0.174543	0.565407	0.0221048	0.989985	0.00669028	0.997471	0.190924	0.793402	0.166109	0.813982	0.0681278	0.846599	-0.0145806	0.971091	-0.172413	0.637185
FBgn0015000	CG3469	2L	1784	2963	2895	2111	2191	3269	4357	2001	2990	2854	2469	3697	2000	-0.567183	1.2056e-05	0.268742	0.353983	0.821219	8.90548e-06	-0.260699	0.619896	0.206481	0.887855	-0.299909	0.276694	-0.510428	0.111791	0.199237	0.770905	-0.194131	0.857884	-0.00421764	0.997908	0.106062	0.994081	0.110228	0.92945	-0.135927	0.79653	0.24872	0.320842	-0.527923	0.11101
FBgn0015010	CG9538	X	1760	10633	10288	4460	5193	4863	1272	7002	7247	2720	7162	6869	858	-1.21762	4.72756e-20	-1.00897	0.0777876	-0.295658	0.656814	-0.592342	0.000315719	0.548515	0.000181322	-0.802621	0.142978	0.13499	0.890393	-0.0275327	0.964345	0.029855	0.979981	-0.307391	0.730556	-0.100702	0.974662	-0.0300522	0.974736	-0.410071	0.508158	-0.0245729	0.972616	0.563006	0.372503
FBgn0015011	CG8956	3R	1969	1684	2197	1844	1785	2155	2487	1580	1892	1960	1665	2037	1495	-0.222885	0.369894	0.147275	0.650509	0.376354	0.0256424	-0.209367	0.7261	-0.00941903	0.998294	-0.256021	0.473172	-0.377203	0.293766	-0.0127636	0.982791	-0.342137	0.323403	-0.0295971	0.97764	-0.00536401	0.996482	0.0121743	0.993147	-0.231808	0.549439	-0.0412374	0.91136	-0.374251	0.167296
FBgn0015019	CG8977	3R	2165	2127	3252	2055	2044	2239	2598	1694	2083	1811	2806	2164	2050	-0.495332	0.0501815	-0.239102	0.499236	0.263825	0.154181	-0.48266	0.172595	-0.0557719	0.998294	-0.374796	0.33302	-0.135849	0.862398	0.0589393	0.900454	-0.194881	0.664366	0.148797	0.845117	0.109025	0.973095	-0.052945	0.961648	-0.431229	0.165252	0.100307	0.788619	-0.315018	0.304788
FBgn0015024	CG2028	X	2791	7630	6700	8125	7749	8295	8127	7962	7676	8053	8258	8121	8099	0.0140581	0.957105	0.0899236	0.709466	0.0774026	0.631559	0.0402989	0.961097	0.028103	0.998294	0.00253662	0.995252	-0.0808223	0.86651	0.0515496	0.898002	-0.0334981	0.975089	-0.0377099	0.949709	0.0200345	0.996169	0.0458128	0.941039	0.0636585	0.832294	-0.00936471	0.965149	-0.0480373	0.899727
FBgn0015025	CG6215	3L	1585	84	75	69	76	99	42	89	83	102	118	84	78	-0.227084	0.642667	-0.235374	0.696003	-0.0212217	0.977504	0.0219153	0.989825	0.173741	0.992292	0.209403	0.743857	0.278402	0.746451	0.110639	0.912351	0.0982487	0.958544	0.16178	NA	-0.0782751	0.994746	-0.217441	0.831834	-0.0727431	0.915849	0.386647	0.460752	0.237395	0.762455
FBgn0015031	CG14028	2L	460	7976	8139	6032	5905	4870	5107	6273	5725	5928	5870	4904	5606	-0.556983	3.52498e-06	-0.774131	7.47137e-07	-0.223063	0.118724	-0.472131	0.0118229	0.0542473	0.998294	-0.611832	0.00030492	0.156343	0.675669	-0.150282	0.542908	0.0501871	0.964094	-0.115872	0.805298	-0.200913	0.705115	-0.103736	0.855688	-0.705601	1.53404e-05	-0.0627885	0.777196	0.273425	0.225473
FBgn0015033	CG4321	3L	1573	1735	1661	3547	3565	3410	2628	3024	2310	3049	3163	2951	4667	0.913304	5.33292e-14	0.69466	0.000152256	-0.206637	0.250904	0.501493	0.0427442	-0.309692	0.304206	0.659139	0.000210539	-0.0269979	0.972774	0.0967974	0.897407	0.252706	0.655436	0.108879	0.874091	0.367042	0.470487	0.284005	0.619962	0.964651	0.00010004	-0.237997	0.12644	-0.143127	0.746956
FBgn0015034	CG2062	2R	1772	1634	2556	599	559	1061	1705	1201	1233	1449	1618	983	1034	-1.84611	6.72481e-17	-0.622545	0.0757723	1.18592	6.38962e-07	-0.710857	0.00996636	0.990487	1.72588e-13	-0.577888	0.072808	0.049249	0.963424	0.743098	4.63517e-08	-0.364922	0.38132	0.212806	0.590349	-0.273121	0.38641	-0.497709	0.0133668	-1.06885	2.43593e-05	1.28577	3.47181e-17	-0.154385	0.794053
FBgn0015035	CG4105	2L	1805	11151	12466	1461	2295	2171	4587	2054	1334	2009	2753	1409	3254	-2.60483	3.16716e-37	-1.32513	0.00633701	0.526033	0.357128	-2.41884	8.28186e-34	-0.0668281	0.998294	-2.3748	4.30366e-42	-0.28473	0.737628	0.0923739	0.920919	-0.137953	0.897053	0.32074	0.554671	0.147481	0.974662	0.019846	0.992263	-1.56055	0.000389244	0.249071	0.511555	-0.558794	0.376481
FBgn0015036	CG10755	X	1822	1142	1013	1469	1411	437	405	1500	1482	837	704	734	772	0.276943	0.120914	-1.40814	5.24191e-16	-1.69809	2.11897e-39	0.351759	0.172595	0.0926512	0.998294	-0.60873	0.0294359	0.677051	0.0191298	-0.837928	5.43944e-12	0.729284	1.38358e-05	-0.922119	4.26283e-05	-0.918442	8.02623e-10	0.0145373	0.992539	-0.603051	0.00153765	-0.869971	2.38249e-05	1.76179	9.84356e-30
FBgn0015037	CG10842	2R	1680	3137	3788	6149	6496	3571	3467	3420	3935	2764	2388	4964	4526	0.709361	9.08729e-06	-0.0804537	0.782056	-0.802421	1.85617e-14	0.00283096	0.997631	-0.649899	3.66522e-06	-0.566916	0.0272214	-0.472796	0.0506547	-0.365194	0.00568142	0.382112	0.024205	-0.546828	0.0414181	0.298653	0.34637	0.828777	1.02393e-05	0.322986	0.184104	-1.26951	2.75066e-16	0.0819693	0.83724
FBgn0015039	CG4486	2R	1667	4606	4411	4735	4573	2370	1821	6084	5251	4411	3476	3251	3632	-0.0864245	0.645187	-1.17576	2.62351e-12	-1.09632	1.59348e-16	0.226021	0.509034	0.30264	0.13757	-0.344587	0.246291	0.737068	0.00303092	-0.386106	0.0025027	0.623161	0.000403566	-0.542455	0.069071	-0.672755	7.15309e-05	-0.127312	0.872772	-0.486641	0.00488103	-0.259354	0.351386	1.38162	1.28619e-15
FBgn0015040	CG3616	2R	1743	884	818	1535	1429	1284	989	1564	1446	1742	1440	1312	1604	0.647726	1.58462e-05	0.294688	0.225267	-0.346998	0.0485474	0.673331	0.000237113	0.0662964	0.998294	0.670141	0.0114596	0.362982	0.374519	-0.00104999	0.999665	0.297013	0.375937	-0.0117295	0.994336	-0.0676439	0.994439	-0.0644006	0.949421	0.629718	0.00221079	0.0561465	0.885715	0.407579	0.0781108
FBgn0015075	CG9054	3L	2470	622	596	691	680	834	789	627	736	799	838	894	771	0.0355899	0.905875	0.297876	0.174135	0.264495	0.122123	0.0708983	0.929811	0.0374018	0.998294	0.225356	0.47753	-0.0566227	0.941187	0.267924	0.270909	0.0179325	0.99258	0.142537	0.832069	0.217796	0.792433	0.0712298	0.941039	0.320514	0.208721	0.193771	0.478481	-0.215515	0.523236
FBgn0015218	CG4035	3L	1793	5118	5589	4312	4243	5297	5284	4127	4896	5262	6409	4702	4624	-0.448257	0.00140938	-0.119093	0.611248	0.331083	0.00488742	-0.295815	0.357281	0.114436	0.992292	-0.0645808	0.837225	0.0572253	0.922313	0.140128	0.482474	-0.186851	0.496336	0.242503	0.535723	0.0136636	0.996169	-0.244524	0.413054	-0.303479	0.128322	0.382714	0.00464932	-0.197809	0.523786
FBgn0015221	CG1469	3R	1443	35238	28503	30480	30948	19283	20567	25501	27825	18001	16860	24704	28201	-0.180615	0.364537	-0.751612	4.35365e-05	-0.581084	7.34644e-07	-0.304908	0.322371	-0.139341	0.87032	-0.999999	5.81554e-08	-0.248925	0.410606	-0.181039	0.363504	0.353465	0.0786613	-0.663351	0.000228295	-0.0395112	0.994746	0.60329	0.000368395	-0.364525	0.102205	-0.836792	8.52951e-12	0.420936	0.0308987
FBgn0015222	CG2216	3R	1677	57556	41103	40281	41002	25060	26506	34975	38826	26373	22481	34395	36343	-0.393636	0.0586757	-0.988082	1.68565e-06	-0.613351	7.44575e-08	-0.432983	0.146438	-0.0792912	0.998294	-1.10356	1.16008e-06	-0.135845	0.796824	-0.169865	0.27699	0.403277	0.0131933	-0.628829	0.00438015	-0.0851212	0.977672	0.528474	0.010329	-0.557894	0.0142374	-0.741283	2.25107e-06	0.513718	0.00513129
FBgn0015229	CG6575	3R	2050	360	373	390	385	404	389	431	326	314	628	308	504	-0.0515373	0.879965	0.00724812	0.985447	0.0595512	0.844131	-0.0326256	0.978616	0.0130707	0.998294	0.128469	0.831121	0.109906	0.925378	0.0641111	0.945112	0.01117	0.995323	0.13902	0.899384	0.0491623	0.994746	-0.0846331	0.951357	0.0287783	0.966908	0.167042	0.761684	-0.0431104	0.947402
FBgn0015239	CG7199	3L	2345	1230	1137	1591	1548	1406	1441	1406	1261	1323	1490	1372	1467	0.266649	0.113984	0.157696	0.515502	-0.107747	0.575843	0.080802	0.909922	-0.164362	0.839335	0.0583719	0.870926	-0.0887442	0.885916	-0.113377	0.727467	-0.0209799	0.987361	-0.024019	0.97766	0.053161	0.994746	0.0658163	0.932627	0.143115	0.611554	-0.202224	0.320449	-0.0712866	0.864614
FBgn0015240	CG11783	3R	2834	674	770	836	938	847	693	794	785	726	882	798	698	0.155473	0.550106	-0.0167608	0.963577	-0.172448	0.436997	0.0397755	0.968984	-0.101126	0.998294	-0.0338353	0.946855	-0.0125788	0.988682	-0.195365	0.547143	-0.0481393	0.973858	-0.0715009	0.928237	-0.0952132	0.978322	-0.0362862	0.97321	-0.0603598	0.880329	-0.18314	0.534437	0.0579645	0.905061
FBgn0015245	CG12101	X	2357	8846	10398	9525	9471	7242	7107	8710	9312	7873	8174	7431	8050	-0.149878	0.477047	-0.513044	0.0055716	-0.369596	0.000575477	-0.16144	0.768045	-0.0217488	0.998294	-0.429698	0.043095	0.0820195	0.859064	-0.258465	0.0487789	0.0851535	0.891953	-0.254546	0.373578	-0.229912	0.519774	0.00425384	0.997548	-0.411712	0.0465348	-0.286761	0.0187228	0.337649	0.0732694
FBgn0015247	CG8293	2R	2106	944	1058	1296	1285	1176	1094	1032	1097	1208	1216	1166	1182	0.22425	0.2663	0.0715186	0.803498	-0.153453	0.370947	0.00456917	0.996097	-0.201529	0.650897	0.085091	0.819937	0.0194883	0.979848	-0.1053	0.763065	0.0293199	0.979981	0.0789436	0.91202	0.0985397	0.970023	0.00895975	0.993164	0.109892	0.737162	-0.132534	0.602062	-0.0666752	0.870713
FBgn0015268	CG5330	2R	1393	3906	4017	6349	6488	5896	5620	5975	4672	5649	6335	6555	6355	0.550993	9.05441e-06	0.423314	0.00890896	-0.125929	0.369344	0.305207	0.345597	-0.189409	0.816482	0.395293	0.0307195	-0.0188859	0.974216	0.0296435	0.949767	0.138444	0.703954	0.0630554	0.930247	0.217142	0.744426	0.157674	0.645635	0.572198	0.000256575	-0.148051	0.323759	-0.0880477	0.837707
FBgn0015269	CG8318	3R	9737	955	1065	1315	1144	1515	1424	1288	937	1359	1305	1066	1180	0.143164	0.563415	0.419918	0.0325063	0.278366	0.0882585	0.0455568	0.968351	-0.074722	0.998294	0.202122	0.524592	-0.196078	0.633095	-0.0968197	0.846564	-0.369103	0.0556785	0.141179	0.849619	-0.0135788	0.996169	-0.171099	0.761657	0.036033	0.93009	0.064799	0.85244	-0.354671	0.221338
FBgn0015277	CG5373	2R	3164	1087	1160	1695	1745	1941	1633	1628	1343	1738	1631	1427	1665	0.466991	0.00240803	0.542333	0.00321999	0.0792226	0.698499	0.283975	0.410606	-0.139695	0.969455	0.378586	0.150672	-0.140502	0.793356	-0.119691	0.751541	-0.200231	0.615548	0.0760135	0.920943	0.0231794	0.996169	-0.0626178	0.943219	0.329912	0.158569	-0.0724066	0.809674	-0.229982	0.451601
FBgn0015278	CG11621	3L	7211	3550	3279	4425	4246	3854	3430	4284	4059	4063	4075	3966	3810	0.206558	0.192683	-0.0136246	0.962586	-0.220431	0.0887678	0.190708	0.601792	-0.0035569	0.998294	0.066524	0.826813	0.0825841	0.878546	-0.126639	0.59412	0.0732061	0.923344	-0.127671	0.769282	-0.121931	0.909016	-0.00907574	0.992539	0.0716787	0.808134	-0.135621	0.478481	0.211235	0.363183
FBgn0015279	CG4141	3R	4839	883	997	840	799	829	930	768	773	649	1200	697	998	-0.321317	0.101859	-0.190148	0.501696	0.129664	0.590475	-0.331854	0.28411	-0.032507	0.998294	-0.200191	0.66853	-0.018543	0.987043	0.0572831	0.943608	-0.0607855	0.973281	0.1137	0.911973	0.0846921	0.994439	-0.0376694	0.979091	-0.244874	0.508368	0.0899121	0.865239	-0.162674	0.666843
FBgn0015282	CG5289	3R	1625	3362	3474	2669	3049	2994	2972	2490	3044	2935	3159	3149	3248	-0.381399	0.0174041	-0.293778	0.113538	0.0887619	0.665413	-0.34574	0.252653	0.00484542	0.998294	-0.340247	0.0927661	-0.0436288	0.941187	0.170267	0.490212	0.0766253	0.91497	0.0323372	0.970032	0.154683	0.896388	0.120081	0.791273	-0.203616	0.357877	0.0397005	0.885715	-0.081628	0.854683
FBgn0015283	CG7619	3L	1422	3150	3479	2738	2786	2371	2521	2560	2985	2424	2689	2531	2622	-0.388127	0.0111027	-0.524665	0.00504531	-0.140561	0.431924	-0.305547	0.335728	0.0514833	0.998294	-0.5401	0.00546794	-0.0143286	0.984166	-0.0731155	0.848317	0.0504824	0.963233	-0.203939	0.627151	-0.12303	0.933387	0.0652462	0.92728	-0.461015	0.0122474	-0.158623	0.377346	0.190305	0.570436
FBgn0015286	CG2849	X	2555	3133	2806	2940	2742	2387	2192	3227	2680	2538	2956	2188	2704	-0.192571	0.279192	-0.468404	0.00615127	-0.277992	0.0339287	-0.0825368	0.911343	0.0941867	0.998294	-0.28895	0.20544	0.1742	0.612021	-0.173682	0.570987	0.0697565	0.952171	-0.191798	0.657373	-0.260404	0.62057	-0.0971755	0.898238	-0.374926	0.103113	-0.0983751	0.652328	0.370682	0.0859417
FBgn0015288	CG7434	X	1100	28421	30073	29414	31375	27704	27706	28887	30028	29874	28485	31452	30130	-0.0773885	0.701637	-0.178726	0.382428	-0.101936	0.51811	-0.0676533	0.920243	0.00644617	0.998294	-0.179491	0.460309	0.00166235	0.997735	0.0395034	0.929373	0.125472	0.769307	-0.105661	0.82825	0.0299885	0.994746	0.123471	0.795005	-0.0390998	0.901771	-0.102107	0.627348	0.105616	0.739037
FBgn0015295	CG18247	2R	3176	923	914	1089	1010	998	775	969	1005	1001	1050	989	896	0.0564488	0.831968	-0.155535	0.572322	-0.211431	0.314072	0.0190204	0.983784	-0.0321939	0.998294	-0.0254872	0.955365	0.123336	0.861896	-0.118813	0.771805	0.0659208	0.958544	-0.0424786	0.958292	-0.0867906	0.978393	-0.0570167	0.948348	-0.0733472	0.830785	-0.0787475	0.795626	0.171176	0.640956
FBgn0015296	CG3715	3L	1600	402	458	427	448	407	364	397	426	391	459	357	374	-0.104747	0.73829	-0.252927	0.373422	-0.148648	0.555134	-0.127372	0.869152	-0.030122	0.998294	-0.18765	0.648417	0.0537196	0.956177	-0.203819	0.553975	-0.0799514	0.94921	-0.0501559	0.960479	-0.172954	0.884281	-0.129288	0.888513	-0.327774	0.262298	-0.0862667	0.836399	0.110093	0.812029
FBgn0015298	CG4457	3L	653	386	325	319	313	319	318	317	283	325	329	377	346	-0.286573	0.276763	-0.248463	0.409592	0.0390625	0.910493	-0.279501	0.542627	-0.0188318	0.998294	-0.271039	0.507587	-0.0304424	0.976888	0.182871	0.661331	0.13949	0.862524	0.0202456	0.98835	0.198983	0.846841	0.160617	0.853628	-0.0825721	0.846746	0.00065961	0.999584	-0.0611133	0.917941
FBgn0015299	CG8396	2L	536	220	164	259	294	255	253	254	180	249	402	291	297	0.362106	0.250055	0.277977	0.433956	-0.0874381	0.798609	0.0717822	0.953935	-0.210751	0.922799	0.463122	0.32224	0.199904	0.814839	0.0910805	0.901948	0.160959	0.837341	0.338235	0.634354	0.312395	0.638299	-0.0550155	0.968684	0.457623	0.153441	0.140449	0.793017	-0.185088	0.733983
FBgn0015320	CG6720	2L	2111	1121	981	1099	1178	1319	1275	1048	1114	1255	1519	1254	1202	-0.0171614	0.955865	0.192329	0.418897	0.21189	0.201549	-0.0370479	0.968984	-0.0199543	0.998294	0.198701	0.511902	0.0156222	0.984166	0.121077	0.729816	-0.0880415	0.901368	0.231047	0.586316	0.136803	0.909016	-0.102953	0.883359	0.107003	0.738073	0.219082	0.355442	-0.230328	0.378485
FBgn0015321	CG8284	3L	1709	1057	979	1221	1191	1096	947	1223	1174	1169	1552	1121	1024	0.10782	0.629894	-0.0994599	0.708534	-0.207522	0.221844	0.139242	0.805217	0.0385823	0.998294	0.211222	0.50476	0.29715	0.43958	-0.13325	0.695693	0.0497607	0.970611	0.0669749	0.9309	-0.171105	0.824182	-0.241842	0.637069	-0.036467	0.925075	0.109661	0.726929	0.243006	0.343415
FBgn0015324	CG1088	3R	2926	78434	86784	84231	82357	83189	86686	82141	88860	87111	82290	86249	83321	-0.120456	0.525512	-0.062359	0.815657	0.0583625	0.751466	-0.0309635	0.971053	0.0831797	0.998294	-0.141076	0.601027	-0.0729765	0.900218	0.0465769	0.909423	-0.0202025	0.986464	-0.104982	0.836416	-0.0402695	0.994746	0.0519174	0.941039	-0.0748776	0.804387	-0.021133	0.932784	0.0284842	0.951893
FBgn0015331	CG14637	3R	1995	199	126	181	217	226	185	209	184	202	281	167	186	0.142725	0.767228	0.208448	0.6362	0.066253	0.875	0.145452	0.887917	0.0239865	0.998294	0.302723	0.577299	0.112951	0.918199	-0.113095	0.885557	-0.182722	0.830193	0.142542	0.891373	-0.145094	0.95933	-0.269073	0.740946	0.00732104	0.993369	0.179171	0.73011	-0.0364217	0.960677
FBgn0015338	CG5861	2L	1126	1212	1309	1143	1119	777	779	1068	996	949	1068	991	1062	-0.282863	0.112698	-0.774395	1.43059e-05	-0.496367	0.000499326	-0.337968	0.222387	-0.0719218	0.998294	-0.483371	0.0394742	0.268376	0.472435	-0.107526	0.779286	0.343651	0.119374	-0.124758	0.829424	-0.0349138	0.994746	0.0756908	0.92945	-0.394046	0.059913	-0.207263	0.370418	0.407623	0.0524809
FBgn0015351	CG14906	3R	1177	188	221	138	129	296	220	145	172	170	179	167	168	-0.685247	0.0139468	0.206186	0.582351	0.892472	0.000266298	-0.358359	0.444993	0.205906	0.944528	-0.349168	0.45908	-0.472812	0.348519	0.259319	0.552286	-0.492511	0.103559	0.0263568	0.985901	0.0360251	0.996169	-0.00131408	0.999388	-0.36522	0.314691	0.268727	0.576803	-0.598928	0.0563468
FBgn0015359	CG2034	3L	1284	452	508	357	406	376	314	442	460	484	584	427	329	-0.44246	0.0501815	-0.557018	0.0185791	-0.11304	0.709139	-0.151897	0.821751	0.241495	0.682035	-0.0342248	0.950912	0.46686	0.207913	0.0081435	0.993166	0.0948665	0.944592	0.119385	0.883038	-0.2316	0.800733	-0.340704	0.543713	-0.424081	0.155539	0.388387	0.196855	0.383786	0.156933
FBgn0015360	CG32300	3L	3380	1206	1261	1379	1373	1656	1492	1209	1387	1564	1720	1560	1391	0.0226232	0.934468	0.237123	0.262112	0.216963	0.147109	-0.00811443	0.992503	-0.0276336	0.998294	0.214406	0.4218	-0.0134815	0.984397	0.113305	0.764093	-0.0985723	0.892009	0.214763	0.626509	0.133907	0.931343	-0.0862634	0.911739	0.138164	0.646305	0.196332	0.331939	-0.241674	0.381398
FBgn0015371	CG11798	2R	5666	31	23	47	41	33	34	37	35	35	948	34	44	0.418003	0.456161	0.154142	0.828479	-0.273113	0.629892	0.171624	NA	-0.101411	0.998294	0.481559	0.285441	0.249952	0.520822	-0.0685107	NA	0.0935895	0.96007	0.270091	0.535723	0.0409118	0.996169	-0.195641	0.613545	0.290753	0.682593	0.344076	0.353018	0.0873329	0.932919
FBgn0015372	CG3870	2R	1648	274	323	242	246	184	209	214	253	182	281	171	205	-0.39873	0.133509	-0.656584	0.0188267	-0.260091	0.392356	-0.360441	0.384572	-0.00815903	0.998294	-0.476483	0.278174	0.103639	0.930988	-0.275262	0.462768	-0.0646656	0.973373	-0.0927857	0.937109	-0.265981	0.76931	-0.153498	0.89607	-0.712912	0.0106048	-0.111835	0.842717	0.23976	0.613786
FBgn0015379	CG17051	X	1021	275	243	254	290	221	197	287	263	256	317	224	228	-0.05853	0.883206	-0.39053	0.179733	-0.330091	0.216307	0.00309344	0.997631	0.0525453	0.998294	-0.0391638	0.952443	0.294191	0.630928	-0.196051	0.671386	0.0784661	0.956629	-0.0378825	0.975116	-0.257749	0.717659	-0.212037	0.803781	-0.286448	0.406826	0.0170982	0.972616	0.383849	0.220993
FBgn0015380	CG17348	2L	3104	145	222	129	167	80	66	117	168	59	64	152	93	-0.389227	0.329636	-1.25913	0.000164881	-0.865749	0.00500084	-0.315774	0.635167	-0.000770413	0.999767	-1.31568	0.00141223	-0.171666	0.881943	-0.14793	0.857177	0.436962	0.333281	-0.799299	0.0816672	-0.151154	0.974662	0.512935	0.376998	-0.575423	0.190625	-0.933323	0.0177045	0.817828	0.0227303
FBgn0015391	CG11397	2L	4521	86	117	111	139	131	107	134	162	152	957	138	139	0.142471	0.782386	0.104722	0.844748	-0.0402764	0.939733	0.336334	0.572561	0.191825	0.978811	0.656098	0.232467	0.375286	0.449052	0.118355	0.886647	0.149666	0.891953	0.34723	0.561969	-0.0944356	0.994439	-0.285944	0.586783	0.286672	0.564052	0.986137	0.0254151	0.295377	0.555068
FBgn0015393	CG3949	2L	607	290	235	232	230	263	231	235	222	325	681	288	256	-0.295717	0.322845	-0.181896	0.604295	0.116369	0.724552	-0.234827	0.699443	0.0279918	0.998294	0.589466	0.200209	0.636391	0.158117	0.208435	0.630709	0.101194	0.93672	0.706125	0.117997	0.179192	0.906081	-0.504292	0.364843	-0.0560367	0.912609	0.801942	0.0356516	-0.0817143	0.884893
FBgn0015402	CG2899	3R	5517	524	540	717	733	790	611	666	730	707	843	755	652	0.301349	0.128826	0.273314	0.301582	-0.0243986	0.939733	0.274686	0.458483	-0.00203727	0.998808	0.32773	0.288067	0.0616215	0.943072	-0.017666	0.977541	-0.00523596	0.995364	0.0399748	0.966369	-0.0172351	0.996169	-0.0668324	0.946698	0.273594	0.334548	0.0397952	0.911742	0.0204648	0.972803
FBgn0015477	CG8014	2R	7771	4353	4255	4555	4355	4266	3671	4407	4320	4130	4215	3931	3881	-0.0827282	0.664929	-0.219772	0.263637	-0.13779	0.378071	-0.0588934	0.92779	0.0203731	0.998294	-0.221685	0.321244	0.000141898	0.999517	-0.157917	0.411471	-0.0350438	0.975089	-0.155995	0.680224	-0.176679	0.717659	-0.03658	0.955883	-0.246446	0.210051	-0.139346	0.449456	0.155147	0.583639
FBgn0015509	CG1877	2R	3886	2898	2937	2888	2913	3039	2760	2827	2999	2987	4376	2901	2968	-0.139798	0.427016	-0.113267	0.610273	0.0267843	0.894478	-0.0784077	0.906114	0.0534977	0.998294	0.129865	0.707968	0.232658	0.596945	0.0375044	0.932848	0.000998315	0.997724	0.201103	0.703642	-0.0193746	0.996169	-0.226515	0.673043	-0.102611	0.705258	0.26547	0.300548	0.0288947	0.949155
FBgn0015513	CG10379	3R	7465	3807	3219	5363	5171	4835	4004	4995	3458	4392	4356	4082	4466	0.439684	0.00392878	0.215692	0.356012	-0.222983	0.125943	0.155542	0.833906	-0.21572	0.829445	0.127462	0.661132	-0.0796414	0.895314	-0.262355	0.0671035	-0.0572621	0.956629	-0.0418843	0.96588	-0.0110961	0.996188	0.0200799	0.981031	0.163395	0.558938	-0.306726	0.0417803	-0.0383908	0.952943
FBgn0015520	CG10328	3R	2908	281	257	320	325	58	57	302	301	158	344	173	165	0.121198	0.709281	-2.12919	1.86218e-16	-2.24278	2.85234e-23	0.0703191	0.936881	-0.0367435	0.998294	-0.24046	0.680391	1.13128	0.00136037	-0.733923	0.000150142	1.07645	8.11824e-06	-0.258443	0.766806	-0.704649	0.00250588	-0.273142	0.760689	-0.721235	0.00571095	-0.321017	0.536325	2.13459	4.01946e-19
FBgn0015521	CG2986	2L	715	9823	6763	10477	11359	9421	9172	10515	6609	9712	9256	9631	9678	0.252589	0.326047	0.0590335	0.871365	-0.199202	0.140791	-0.0297278	0.983004	-0.22921	0.839335	0.0127949	0.982872	-0.041203	0.943367	-0.146247	0.482231	0.0345713	0.973819	0.0446825	0.966741	0.114504	0.978322	0.0746524	0.905139	0.101759	0.802304	-0.241312	0.175861	-0.0913673	0.873507
FBgn0015522	CG14489	2R	1746	313	311	382	394	395	335	319	389	394	705	297	326	0.171806	0.540838	0.112081	0.737606	-0.0589436	0.853162	0.0849069	0.925292	-0.0628916	0.998294	0.52214	0.20917	0.376016	0.513609	-0.248791	0.432821	-0.205416	0.710049	0.386058	0.535723	-0.176305	0.909016	-0.518331	0.292882	-0.108928	0.791532	0.359671	0.392826	-0.0171482	0.978046
FBgn0015527	CG1685	X	2367	584	482	575	551	613	489	605	570	607	751	608	543	-0.0515278	0.877773	-0.0578706	0.874287	-0.00575156	0.985976	0.0512219	0.959999	0.097625	0.998294	0.145999	0.716006	0.193225	0.74673	0.0481644	0.944089	0.042431	0.976538	0.0905432	0.911939	-0.0524724	0.994746	-0.148668	0.849659	-0.00155743	0.998066	0.199075	0.52063	0.11061	0.806546
FBgn0015541	CG5518	3R	5182	3616	3793	3016	3655	4768	3955	2971	2940	2921	2546	3111	3270	-0.276397	0.152805	0.122323	0.607993	0.399418	0.0145974	-0.378509	0.0812125	-0.107408	0.998294	-0.584928	0.0097159	-0.671014	0.00120638	-0.0376304	0.95176	-0.426845	0.0111789	-0.189472	0.694238	0.0726767	0.979419	0.245448	0.565866	-0.319388	0.0969037	-0.30855	0.230214	-0.514856	0.00306584
FBgn0015544	CG13570	2R	1825	181	181	208	216	295	209	227	231	310	412	251	257	0.087316	0.829575	0.337077	0.329734	0.250708	0.437207	0.2134	0.742369	0.125743	0.998294	0.696412	0.0520647	0.337297	0.566331	0.228503	0.565407	-6.4831e-05	0.99981	0.440493	0.388891	0.0967379	0.982707	-0.339112	0.565866	0.345172	0.299238	0.609606	0.0586889	-0.0987033	0.869593
FBgn0015546	CG4215	2L	4433	512	412	576	528	285	203	716	435	463	727	357	438	0.117889	0.702615	-0.96216	0.000137701	-1.0861	4.39012e-08	0.181667	0.833674	0.0767072	0.998294	0.147183	0.763358	0.91039	0.00408664	-0.379818	0.100051	0.540922	0.0516086	-0.0468471	0.972044	-0.407674	0.396894	-0.381907	0.505779	-0.305475	0.355782	0.039796	0.936942	1.08974	0.000170929
FBgn0015553	CG10387	2L	2390	380	150	390	304	608	848	355	227	397	1055	441	690	0.214217	0.695012	0.853301	0.138745	1.01612	1.87889e-05	0.0343042	0.983725	-0.135301	0.998294	0.860055	0.0865731	-0.0725918	0.955496	0.523699	0.0487789	-0.281114	0.646243	0.736207	0.126366	0.633167	0.0577371	-0.154321	0.902436	0.781989	0.0672711	0.703322	0.103746	-1.13155	8.61979e-05
FBgn0015568	CG1031	3R	2123	309	411	1364	1458	1182	782	965	923	792	731	915	1051	1.73918	1.1388e-20	1.23235	1.35801e-06	-0.476689	0.0248709	1.11196	1.5878e-07	-0.471661	0.00287477	0.798863	0.0102799	-0.356425	0.452284	-0.450521	0.00381336	-0.00678106	0.995323	-0.36257	0.346014	0.0237423	0.996169	0.361429	0.36852	1.23469	3.16659e-08	-0.875706	1.67792e-06	-0.0248111	0.970924
FBgn0015569	CG1131	3R	2161	113	140	177	153	173	144	168	224	105	142	169	145	0.222244	0.583965	0.195358	0.644275	-0.0288928	0.953095	0.414292	0.366703	0.203725	0.955271	-0.177814	0.778207	-0.297466	0.685539	-0.0350449	0.96896	-0.0209677	0.993536	-0.534857	0.348239	-0.255441	0.81733	0.256619	0.775544	0.172639	0.740984	-0.365219	0.448772	0.291032	0.547974
FBgn0015570	CG2505	3R	2141	67	40	53	38	59	65	46	39	62	54	43	76	-0.275165	0.644087	0.0912157	0.892805	0.377857	0.440415	-0.234989	0.814845	-0.0199366	0.998294	-0.0367424	0.968828	-0.0841795	0.947307	0.176319	NA	-0.0418413	0.984855	0.170562	NA	0.222568	0.90911	0.0341934	0.981893	0.0305593	0.977482	0.170915	0.804811	-0.402996	0.50013
FBgn0015571	CG1257	3R	1878	9385	9350	9723	10666	7577	6888	9725	8422	7758	7423	7422	8054	-0.0116866	0.962949	-0.469666	0.00208196	-0.459452	5.80468e-05	-0.119844	0.831368	-0.104772	0.992359	-0.468291	0.0136513	-0.00141792	0.997952	-0.351205	0.0076676	0.0755812	0.913364	-0.330192	0.254433	-0.235682	0.546892	0.0759354	0.907744	-0.378199	0.0288361	-0.456055	0.001896	0.335484	0.0929374
FBgn0015572	CG1082	3R	1749	898	1171	1760	1766	1655	1767	1511	1068	1275	1312	1467	1799	0.604435	0.00222236	0.590459	0.0112841	-0.0113908	0.967746	0.189805	0.801812	-0.322523	0.368539	0.124751	0.750157	-0.440602	0.0647792	-0.0790925	0.8865	-0.0769608	0.946819	-0.081362	0.928237	0.250466	0.767745	0.346183	0.332912	0.504517	0.056355	-0.47647	0.00260389	-0.360408	0.247269
FBgn0015574	CG1108	3R	1836	334	361	2151	2012	1861	2170	1296	1401	1411	1403	2590	2927	2.36915	1.89008e-60	2.32405	2.8776e-35	-0.0122431	0.970626	1.66903	2.6959e-22	-0.513601	0.000605788	1.71031	2.87479e-17	-0.535977	0.0284069	0.395726	0.00527579	0.377946	0.117475	-0.0357336	0.96588	0.894778	1.32076e-08	0.934929	4.27169e-09	2.74238	1.80704e-62	-0.587135	0.000176569	-0.528862	0.0164715
FBgn0015575	CG1112	3R	2017	667	596	1316	1133	447	458	753	699	453	381	893	839	0.791344	2.83054e-06	-0.560072	0.00887449	-1.35488	2.52827e-19	0.10595	0.884852	-0.60594	0.000224454	-0.699796	0.0217601	-0.1536	0.856406	-0.425507	0.0116186	0.810893	1.19154e-06	-0.757551	0.00800228	0.198359	0.772305	0.905681	0.000140293	0.326701	0.170421	-1.44148	9.19253e-12	0.662508	0.000872424
FBgn0015577	CG1128	3R	3455	2083	2610	928	1133	1319	1467	1067	1495	1223	1314	1517	966	-1.25828	1.07017e-11	-0.816164	0.000113704	0.447798	0.0181903	-0.793622	0.00159246	0.280005	0.645707	-1.00917	1.77763e-06	-0.194281	0.658639	0.222148	0.63773	-0.14352	0.89097	-0.101701	0.905681	-0.0557047	0.994746	0.0225395	0.98768	-0.935353	0.000545772	0.232831	0.399388	-0.0918936	0.869593
FBgn0015582	CG12390	2R	1681	525	502	580	638	595	544	519	568	595	687	589	582	0.108012	0.694666	0.0411409	0.899556	-0.0665073	0.801824	-0.000293056	0.999718	-0.0944585	0.998294	0.121681	0.750642	0.0824841	0.918266	-0.0300003	0.964345	0.0210122	0.990136	0.116924	0.878014	0.0658421	0.994439	-0.0613336	0.948348	0.0719648	0.843249	0.0194889	0.960767	-0.0416288	0.939094
FBgn0015589	CG1451	3R	8441	3187	3602	3282	3141	4193	3514	3226	3148	3292	3081	2913	3214	-0.209418	0.260717	0.0707063	0.800044	0.282931	0.0397426	-0.160025	0.748033	0.0376829	0.998294	-0.260329	0.332732	-0.316537	0.274412	-0.0424315	0.929807	-0.315626	0.136056	-0.0908347	0.883038	-0.0809413	0.978322	-0.00325258	0.998527	-0.252711	0.299607	-0.0547114	0.848215	-0.239496	0.309417
FBgn0015600	CG9660	2L	8297	244	253	200	218	536	496	233	285	380	948	408	318	-0.358851	0.195771	0.903453	1.36712e-05	1.26841	3.67945e-13	-0.0185957	0.989825	0.267901	0.718928	0.940844	0.0264963	0.175525	0.871792	0.635615	0.00376144	-0.433129	0.120732	0.798429	0.0712256	0.351672	0.497631	-0.453021	0.463035	0.397296	0.21617	1.14819	0.00144497	-0.895827	5.4894e-05
FBgn0015602	CG10159	2R	1558	523	427	549	557	591	531	636	526	635	905	561	550	0.0826216	0.796522	0.127915	0.682066	0.0466761	0.868211	0.178662	0.793208	0.101998	0.998294	0.452433	0.190484	0.317037	0.499827	0.0261754	0.96896	-0.026719	0.984855	0.249941	0.680224	-0.0813253	0.990143	-0.330958	0.522614	0.106812	0.783006	0.377304	0.211225	0.0679717	0.893504
FBgn0015614	CG11217	2R	2061	2061	1936	2260	2208	2489	2356	2340	1987	2274	2422	2046	2357	0.0263714	0.916125	0.167579	0.431217	0.143056	0.34708	0.027834	0.976339	0.00440145	0.998294	0.0446744	0.894413	-0.113682	0.793356	0.00124543	0.999467	-0.141901	0.776833	0.0159	0.985901	-0.00511151	0.996482	-0.0331556	0.968711	0.0247062	0.954313	0.0210314	0.934733	-0.135837	0.690144
FBgn0015615	CG9802	X	4020	655	600	854	817	842	699	810	738	747	1199	847	715	0.270151	0.173004	0.180443	0.497027	-0.0880961	0.712169	0.19692	0.684687	-0.0514112	0.998294	0.389167	0.288069	0.206905	0.754185	-0.0647862	0.92364	0.00501303	0.995364	0.18001	0.807915	-0.0149212	0.996169	-0.191431	0.820792	0.191764	0.553831	0.138754	0.744507	0.029206	0.957825
FBgn0015618	CG10572	3L	1529	107	113	132	149	105	89	133	135	139	182	134	135	0.196203	0.640101	-0.259726	0.546627	-0.453049	0.171091	0.155907	0.869159	-0.0112718	0.998294	0.279772	0.615441	0.428078	0.484895	-0.0289107	0.975565	0.327605	0.522213	0.108342	0.927587	-0.0195387	0.996169	-0.125065	0.928996	0.155306	0.766832	0.105558	0.86384	0.425189	0.297598
FBgn0015621	CG3642	2L	1246	86	65	94	86	80	61	86	75	82	191	74	64	0.103012	0.859418	-0.17713	0.746753	-0.278974	0.527289	0.00715585	0.99586	-0.0650526	0.998294	0.427154	0.486863	0.42555	0.525866	-0.218252	0.719213	-0.026599	0.99258	0.338713	0.685272	-0.160938	0.970023	-0.394021	0.571214	-0.198122	0.7497	0.324062	0.578633	0.176585	0.80778
FBgn0015622	CG11958	3R	2623	9421	11896	9474	9153	9296	10906	8171	9857	8605	8983	9829	9611	-0.318837	0.108469	-0.171156	0.572509	0.146753	0.478811	-0.283016	0.495142	0.0051485	0.998294	-0.440895	0.0621939	-0.25808	0.425769	0.0807424	0.786906	-0.0690191	0.95293	-0.127691	0.807915	0.0676989	0.994439	0.191419	0.50124	-0.236899	0.400154	-0.129521	0.414711	-0.136822	0.752235
FBgn0015623	CG11567	2L	2739	26734	28180	14101	13462	12277	12974	14617	16612	13772	12471	15771	11483	-1.10745	6.43049e-22	-1.19101	3.38983e-15	-0.09299	0.604221	-0.819385	1.7394e-06	0.210068	0.553929	-1.19282	1.23527e-12	-0.0157237	0.982682	0.00677051	0.993378	0.0777158	0.954265	-0.320294	0.338709	-0.188656	0.874772	0.0929055	0.928544	-1.05825	2.01569e-07	-0.110932	0.641635	0.311545	0.178571
FBgn0015663	CG2788	2L	2303	289	354	296	282	229	194	279	317	240	253	258	266	-0.270888	0.358951	-0.666594	0.0131477	-0.398293	0.101857	-0.160787	0.839406	0.0763745	0.998294	-0.497322	0.202322	0.114517	0.916143	-0.0979301	0.8865	0.239267	0.657258	-0.302961	0.622125	-0.178568	0.901092	0.111142	0.928996	-0.378541	0.236334	-0.242628	0.545272	0.473952	0.108591
FBgn0015664	CG5838	2L	2872	598	767	816	853	656	723	788	748	640	1001	618	841	0.146552	0.622016	-0.0844196	0.817383	-0.234643	0.255955	0.0732219	0.932473	-0.0599625	0.998294	0.0574103	0.92077	0.131862	0.882345	-0.143526	0.785363	0.049126	0.976538	-0.015124	0.992722	-0.0876917	0.990325	-0.0774008	0.948348	-0.0190053	0.977482	-0.077615	0.866318	0.163816	0.662469
FBgn0015714	CG10241	2R	1727	2908	2774	1633	1020	2815	2720	2791	2448	3473	3340	2445	2334	-1.15042	2.0547e-07	-0.139518	0.517843	1.02019	1.12558e-06	-0.184181	0.660728	0.762854	0.000300091	0.0758723	0.806862	0.212151	0.520822	0.686816	0.000941477	-0.212548	0.41251	0.25977	0.473239	-0.147157	0.880421	-0.420079	0.0450463	-0.35165	0.0560204	1.16682	6.673e-07	-0.0562325	0.891769
FBgn0015737	CG3373	3R	2360	6111	6484	5974	5631	6311	6382	5405	7185	6215	6659	5850	6263	-0.24749	0.10778	-0.0911743	0.703189	0.156878	0.293964	-0.0717279	0.932248	0.142279	0.980694	-0.150329	0.525538	-0.0538845	0.920806	0.0798871	0.820378	-0.0801378	0.904499	-0.0645565	0.935187	-0.0754152	0.994439	-0.0289896	0.965189	-0.16552	0.500609	0.0972872	0.580877	0.00976176	0.988607
FBgn0015754	CG8440	2R	3292	2777	2690	2826	2752	2993	2855	2768	2555	2710	3416	2480	2801	-0.102864	0.584685	-0.00823985	0.976869	0.0955019	0.556856	-0.112703	0.840504	-0.0145153	0.998294	-0.0264334	0.946855	-0.0129384	0.984923	-0.0523432	0.92127	-0.151419	0.724198	0.0889441	0.887034	-0.0386052	0.994746	-0.138085	0.811881	-0.158164	0.553136	0.0765909	0.765003	-0.11022	0.737071
FBgn0015756	CG6141	2L	807	21312	20268	24750	25266	20085	20222	23570	20701	21453	19929	20324	24015	0.13051	0.414043	-0.145501	0.482041	-0.27678	0.0182102	0.00626606	0.993854	-0.114017	0.973119	-0.18102	0.464671	-0.0322683	0.960452	-0.140386	0.614592	0.10794	0.867495	-0.180396	0.662619	-0.0258405	0.996169	0.138764	0.805861	-0.02055	0.960313	-0.30867	0.0561487	0.148915	0.619215
FBgn0015765	CG5475	3R	1634	354	342	410	413	631	444	378	384	445	493	423	392	0.103018	0.735137	0.484402	0.0704543	0.384419	0.104614	0.0418704	0.968984	-0.0493775	0.998294	0.221232	0.562631	-0.220385	0.731325	0.0077826	0.991786	-0.3344	0.364739	0.169359	0.803435	0.0561928	0.994746	-0.119444	0.898238	0.107303	0.783006	0.125194	0.742678	-0.428797	0.151184
FBgn0015766	CG10596	3L	2722	939	954	1304	1183	587	735	1379	1394	841	812	921	1017	0.251666	0.181281	-0.586046	0.0137898	-0.834358	5.5563e-06	0.427127	0.0549318	0.1867	0.736185	-0.355416	0.208083	0.206527	0.736965	-0.305079	0.100051	0.442932	0.0930448	-0.768348	0.000180839	-0.4927	0.0100849	0.248759	0.594031	-0.07714	0.820964	-0.597576	0.00206366	1.00787	1.09553e-06
FBgn0015772	CG10637	2L	5364	4012	3730	3806	3754	3921	4004	4194	3674	4154	4152	3752	3776	-0.164638	0.320357	-0.0680907	0.789287	0.0967824	0.572018	-0.0552805	0.936881	0.0986943	0.992359	-0.0792476	0.78093	-0.00685334	0.989259	0.0159618	0.972973	-0.0862096	0.892185	-0.0194656	0.980752	-0.0857992	0.977793	-0.0808428	0.889989	-0.149269	0.540448	0.0852681	0.693966	0.00851646	0.987444
FBgn0015773	CG18657	X	3339	116	111	94	102	101	91	107	114	105	82	75	108	-0.306462	0.441123	-0.313005	0.4442	-0.0018553	0.997786	-0.0925307	0.929975	0.144085	0.998294	-0.339598	0.561913	-0.0607897	0.963424	-0.0466998	0.964127	-0.0553846	0.976538	-0.20796	0.837193	-0.199762	0.920595	0.00814055	0.99758	-0.360505	0.456843	-0.0744498	0.914335	0.194077	0.752252
FBgn0015774	CG10521	X	7926	20	22	39	29	72	51	26	26	49	39	39	45	0.381618	0.530745	1.10916	0.0143117	0.672283	0.125986	0.102477	NA	-0.117982	0.998294	0.450443	0.488167	-0.245937	0.791466	0.140335	NA	-0.301135	0.67225	0.263618	NA	0.310411	0.776607	-0.00667198	0.998263	0.612988	0.27407	0.163246	0.817497	-0.876235	0.045402
FBgn0015776	CG9258	2L	2195	45300	55427	49879	49680	53491	59949	47124	53190	50756	49256	54169	50417	-0.147842	0.513127	0.0655397	0.841665	0.216048	0.186068	-0.0799349	0.921791	0.0577503	0.998294	-0.185532	0.513808	-0.240212	0.44377	0.0895089	0.760392	-0.124753	0.843552	-0.0972282	0.860789	0.0256085	0.996169	0.112006	0.819207	-0.0587378	0.871909	-0.039333	0.86384	-0.150632	0.675074
FBgn0015777	CG9261	2L	2668	260	223	133	186	103	124	250	208	145	125	115	141	-0.661667	0.0246701	-1.08861	9.82282e-05	-0.399818	0.284557	-0.132119	0.884562	0.384098	0.363787	-0.843633	0.0295349	0.112234	0.929017	-0.194867	0.757554	0.104221	0.952171	-0.62327	0.186054	-0.652813	0.0222237	-0.0157617	0.99292	-0.926473	0.000864338	-0.209906	0.717805	0.902027	0.00172584
FBgn0015778	CG9412	3R	5382	4730	3906	5545	5194	6653	6122	5261	5110	6070	7837	5643	5341	0.176445	0.385044	0.445451	0.0174154	0.274199	0.0215371	0.165885	0.734837	0.00149778	0.998887	0.471024	0.0386418	0.0388308	0.953267	0.052514	0.913946	-0.218616	0.345476	0.293929	0.341231	0.0477881	0.994439	-0.253673	0.467635	0.225302	0.367629	0.305043	0.0819083	-0.269275	0.163528
FBgn0015781	CG6009	3R	1168	87	65	77	88	106	85	99	104	95	191	84	74	-0.0116511	0.986149	0.192444	0.705646	0.204212	0.655924	0.238753	0.786992	0.214238	0.950878	0.488889	0.397962	0.273959	0.751336	-0.0239877	0.979186	-0.188549	0.852982	0.219489	0.829424	-0.265559	0.817915	-0.378944	0.5936	-0.0463011	0.956292	0.467606	0.376264	0.0961869	0.8998
FBgn0015789	CG17060	X	2336	2191	2372	2447	2556	3131	2766	2491	2343	2796	3066	2524	2549	-0.00183973	0.993742	0.254418	0.209413	0.259321	0.0511533	-0.0009188	0.99845	0.0019092	0.998808	0.166387	0.522584	-0.0788789	0.882734	0.0403372	0.930978	-0.216084	0.391788	0.165445	0.664839	0.0354134	0.994746	-0.141039	0.737996	0.0366912	0.916476	0.172473	0.332418	-0.253735	0.247319
FBgn0015790	CG5771	3R	1815	5716	5802	5377	5532	5379	5347	5264	5385	5206	5350	5195	5482	-0.208617	0.163	-0.202721	0.302327	0.00538107	0.980412	-0.182279	0.619188	0.016022	0.998294	-0.300846	0.135827	-0.0934202	0.834733	-0.00787995	0.982791	-0.0232791	0.983608	-0.107538	0.810847	-0.0257413	0.995535	0.068495	0.907807	-0.21704	0.303405	-0.0940982	0.618471	0.0101795	0.982256
FBgn0015791	CG4212	2L	1468	1816	2108	1787	1823	2220	2014	2064	1496	1962	2100	1780	1868	-0.247661	0.20472	0.00152692	0.996096	0.252883	0.0613107	-0.194657	0.759128	0.0247434	0.998294	-0.130903	0.67098	-0.126384	0.767467	0.0353868	0.945112	-0.213911	0.417617	0.0798023	0.922377	0.00462213	0.996482	-0.0906618	0.880648	-0.211129	0.437125	0.115934	0.589026	-0.213542	0.571837
FBgn0015793	CG7062	3L	1062	387	398	488	489	476	390	458	404	491	476	390	458	0.173744	0.502961	0.0307018	0.934946	-0.142101	0.578611	0.0444289	0.96666	-0.108242	0.998294	0.10642	0.813009	0.0752059	0.939364	-0.155664	0.721898	-0.0378753	0.979981	0.0576021	0.954864	-0.0460241	0.994746	-0.110165	0.917	-0.00303685	0.995281	-0.0565435	0.893307	0.0164519	0.976909
FBgn0015794	CG3129	X	833	1915	1543	1783	1766	1839	1806	1947	1370	1853	1776	1473	1870	-0.0919158	0.726454	-0.0266767	0.936543	0.0667224	0.731619	-0.121701	0.887917	-0.0380027	0.998294	-0.104953	0.769282	-0.0731853	0.916143	-0.0566852	0.929443	-0.125959	0.863837	0.0289503	0.9783	-0.0151283	0.996169	-0.0567231	0.952798	-0.151869	0.678535	-0.0138843	0.963511	-0.108442	0.828562
FBgn0015795	CG5915	3R	1515	10148	9731	10519	10351	10290	8857	11202	9617	10203	9438	9109	9924	-0.0626051	0.742789	-0.158446	0.440726	-0.096328	0.540175	-0.0158712	0.987754	0.0431719	0.998294	-0.190709	0.448995	-0.0300286	0.963639	-0.104493	0.69907	-0.0220726	0.984855	-0.166636	0.71879	-0.144537	0.884602	0.00690918	0.99421	-0.171335	0.458475	-0.128275	0.551614	0.13797	0.673557
FBgn0015797	CG6601	2L	1896	2189	2637	1815	2028	2163	2287	1690	2138	1749	2006	2013	2059	-0.446755	0.0177612	-0.212953	0.413036	0.23619	0.172518	-0.360239	0.303789	0.0395812	0.998294	-0.522198	0.0246292	-0.301644	0.285442	0.0980095	0.800166	-0.134889	0.794751	-0.119605	0.861514	0.0485325	0.994746	0.16342	0.703894	-0.34411	0.143225	-0.0826129	0.757019	-0.183769	0.631444
FBgn0015799	CG7413	X	3619	549	465	598	552	788	632	570	535	719	1398	767	617	0.0463247	0.888951	0.359681	0.150761	0.316774	0.108554	0.0366576	0.970893	-0.00496135	0.998294	0.733681	0.0472346	0.369343	0.515894	0.246445	0.437746	-0.0419474	0.976538	0.629387	0.136937	0.247857	0.70852	-0.374645	0.549594	0.314389	0.304737	0.673449	0.0492332	-0.316507	0.24916
FBgn0015803	CG10043	2L	5284	1168	1048	1306	1198	1358	1313	1115	1151	1174	1514	1167	1265	0.0414739	0.881114	0.159535	0.506867	0.119508	0.530521	-0.0453185	0.959822	-0.0817366	0.998294	0.0814727	0.829813	-0.0658946	0.930988	-0.0176259	0.975663	-0.139698	0.780921	0.125044	0.841227	0.0631426	0.994439	-0.0722963	0.935461	0.0199757	0.963627	0.0433978	0.898327	-0.206461	0.445904
FBgn0015805	CG7471	3L	2124	1313	1266	1371	1456	1508	1429	1357	1621	1550	2222	1451	1337	-0.00131162	0.99547	0.079495	0.756709	0.0818829	0.67995	0.112437	0.876004	0.10996	0.998294	0.328978	0.274231	0.245325	0.581758	0.00280767	0.996982	-0.0839055	0.916689	0.199118	0.745393	-0.110555	0.970023	-0.315805	0.489249	-0.00117689	0.998066	0.330908	0.201501	0.0407527	0.937268
FBgn0015808	CG17320	2L	1883	3527	3299	4236	4292	4138	3901	3983	3904	3982	3577	3896	4055	0.183828	0.25117	0.127189	0.555236	-0.0557186	0.747004	0.11657	0.827874	-0.0564142	0.998294	-0.0314588	0.939215	-0.146698	0.751184	-0.0742721	0.832425	-0.030875	0.976538	-0.145237	0.772159	-0.0182309	0.996169	0.113809	0.855367	0.103217	0.70175	-0.208703	0.354463	-0.0054121	0.989649
FBgn0015818	CG3780	X	1643	270	347	350	332	236	203	304	301	238	387	259	249	0.00798774	0.986149	-0.558567	0.0527675	-0.574884	0.00681946	-0.0941121	0.921791	-0.0984456	0.998294	-0.153101	0.782977	0.308379	0.645871	-0.334183	0.213167	0.159281	0.844994	-0.0515408	0.966749	-0.235748	0.770618	-0.158547	0.883576	-0.362264	0.294558	-0.156843	0.758039	0.447813	0.115195
FBgn0015828	CG10415	3L	1622	288	282	343	330	292	284	302	300	330	530	275	299	0.100133	0.76298	-0.085546	0.809669	-0.185622	0.484627	-0.00366436	0.997478	-0.088685	0.998294	0.339432	0.442281	0.375325	0.498584	-0.172849	0.699689	-0.0190833	0.993536	0.311939	0.632714	-0.083712	0.994076	-0.369707	0.54605	-0.0969403	0.820444	0.244684	0.575216	0.0789308	0.88084
FBgn0015829	CG1276	3L	1121	207	248	363	352	311	266	258	295	288	333	309	328	0.48428	0.0529638	0.218281	0.52451	-0.268607	0.267265	0.162647	0.840504	-0.253288	0.687611	0.224402	0.635174	0.0243468	0.98219	-0.12178	0.831453	0.106747	0.920164	0.0503905	0.96588	0.141335	0.952936	0.0762156	0.946698	0.34057	0.30915	-0.227732	0.539341	-0.0334442	0.961142
FBgn0015834	CG8882	2L	1177	3920	4067	4611	4592	4137	4052	4367	4132	4362	4460	4685	4527	0.0685994	0.737162	-0.0677011	0.782328	-0.136656	0.346107	0.00534867	0.994154	-0.058392	0.998294	-0.0404028	0.900364	0.0308259	0.960195	0.0232084	0.961278	0.141863	0.70864	-0.0438833	0.945404	0.0786175	0.978322	0.111719	0.812816	0.0886333	0.752436	-0.107011	0.567225	0.0718151	0.838432
FBgn0015838	CG8075	2R	3492	286	240	313	316	336	325	355	284	346	461	326	279	0.117591	0.734294	0.212391	0.507891	0.0958418	0.751135	0.164114	0.833906	0.0575188	0.998294	0.373513	0.353063	0.168087	0.830359	-0.0268381	0.974211	-0.12011	0.897651	0.185136	0.814287	-0.0866004	0.994439	-0.268146	0.701973	0.0823422	0.859846	0.265649	0.478481	-0.0262285	0.969599
FBgn0015872	CG9023	2R	1745	6941	7004	6455	6089	10927	11215	5917	6410	8437	7437	8123	8872	-0.281647	0.0435113	0.549026	0.000545578	0.835111	2.10409e-14	-0.240546	0.428934	0.024907	0.998294	0.00648417	0.990022	-0.508398	0.0151006	0.434061	0.000161556	-0.370755	0.0282639	0.245961	0.537498	0.392586	0.0528618	0.13591	0.813982	0.165677	0.486648	0.28276	0.170125	-0.791505	4.87899e-07
FBgn0015903	CG5393	2R	2827	443	589	611	552	555	578	563	542	484	1041	484	643	0.0338652	0.934468	0.0273463	0.94729	-0.00657957	0.984308	0.011001	0.991676	-0.0186895	0.998294	0.288168	0.582023	0.236859	0.767467	-0.019099	0.979186	-0.0229057	0.991259	0.249251	0.765643	-0.00299184	0.996705	-0.231091	0.810719	0.00909984	0.990492	0.252713	0.608265	-0.0154545	0.976544
FBgn0015905	CG4426	2L	2745	323	203	296	286	321	214	274	262	340	435	300	240	0.0135388	0.979979	-0.0776424	0.881954	-0.0923774	0.811808	-0.0411652	0.976339	-0.053554	0.998294	0.311066	0.518846	0.350263	0.546006	-0.0668059	0.932848	0.00310362	0.996908	0.349489	0.520793	-0.0157058	0.996169	-0.342548	0.572322	-0.0633379	0.919066	0.314478	0.381696	0.0284163	0.970678
FBgn0015924	CG4280	2L	2775	3731	3691	4023	4104	5870	4975	3894	3730	4756	5219	4292	4484	-0.00308539	0.989243	0.427273	0.0117482	0.43411	0.000254807	-0.0414644	0.957938	-0.0373735	0.998294	0.231454	0.276026	-0.184118	0.552353	0.126659	0.570987	-0.296021	0.135428	0.270651	0.298091	0.158558	0.798156	-0.119865	0.774427	0.12383	0.624049	0.239121	0.0819276	-0.465852	0.00684774
FBgn0015925	CG3730	2R	2013	2008	1984	2983	2518	2530	2257	2994	2640	2848	2847	2843	3076	0.318584	0.0707236	0.150657	0.487096	-0.168474	0.366491	0.378805	0.1047	0.0749695	0.998294	0.314871	0.163824	0.166909	0.649338	0.116941	0.760695	0.268156	0.216846	-0.0776639	0.899384	0.0363888	0.994746	0.102857	0.854657	0.438942	0.0129396	0.00213211	0.994919	0.247011	0.303508
FBgn0015929	CG1616	2R	3071	64	104	64	62	26	33	37	79	46	1020	59	78	-0.447847	0.339347	-1.27252	0.00274313	-0.81555	0.0488797	-0.332656	0.660911	-0.0255768	0.998294	0.375944	0.439987	0.276766	0.472435	0.0790647	0.937132	0.600135	0.0938759	0.250288	0.584485	0.0962937	0.994439	-0.188053	0.660486	-0.324492	0.587981	0.345752	0.370418	0.645398	0.241142
FBgn0015949	CG9854	2R	4043	1551	1610	1978	1835	1849	1794	1989	1665	1904	1834	1714	1720	0.132546	0.515687	0.0963218	0.694891	-0.0356533	0.873969	0.112223	0.868108	-0.00896207	0.998294	0.0555563	0.880733	-0.0330442	0.963119	-0.119177	0.697223	-0.0951109	0.879404	-0.058861	0.938979	-0.106641	0.96865	-0.0617917	0.938002	0.00489642	0.991398	-0.0720025	0.803013	0.0234469	0.964538
FBgn0016013	CG14993	3L	1421	715	754	1117	1124	225	239	1011	972	540	509	743	889	0.460565	0.00521801	-1.68534	2.62483e-18	-2.15833	1.46509e-47	0.315706	0.288994	-0.111745	0.983773	-0.617218	0.0235934	0.904869	0.000786156	-0.387121	0.0323092	1.51287	1.99739e-18	-0.903484	3.36764e-05	-0.273097	0.521717	0.578266	0.04008	0.0349717	0.938027	-1.06431	5.6027e-09	1.988	1.69596e-29
FBgn0016031	CG10645	3L	3655	16778	17871	7297	10192	17791	18192	7457	15454	13983	10847	15655	9775	-1.0676	8.02682e-09	-0.0487219	0.853043	1.02393	2.04785e-09	-0.49827	0.244481	0.13608	0.998294	-0.613508	0.0142063	-0.536511	0.0376053	0.273558	0.602483	-0.410628	0.21644	0.00972763	0.997471	0.0404821	0.996169	0.0655521	0.955557	-0.512991	0.0848324	0.420296	0.150379	-0.531002	0.180822
FBgn0016032	CG2374	2R	1029	38	43	42	36	33	24	65	39	28	23	28	37	-0.144078	0.83151	-0.471387	0.408621	-0.308505	0.594403	0.153864	0.897775	0.187856	0.978847	-0.442402	0.49718	-0.0713937	0.954841	-0.100116	NA	0.0739514	0.973373	-0.438724	NA	-0.326842	0.74535	0.116691	0.929098	-0.312178	0.642853	-0.302524	0.6237	0.60911	0.262825
FBgn0016038	CG17828	X	1343	882	960	1033	1075	1342	1368	1006	1027	1139	1252	1174	1194	0.058023	0.834	0.436908	0.0284543	0.382819	0.0091907	0.0529573	0.94811	-0.000179523	1	0.177775	0.562604	-0.238184	0.500014	0.175631	0.475245	-0.194458	0.564223	0.120309	0.832069	0.170425	0.815557	0.0403931	0.961648	0.237236	0.348099	0.124599	0.629907	-0.37659	0.0707819
FBgn0016041	CG12157	X	2395	2650	3474	2532	2403	2099	2494	2510	2651	2243	2959	2576	2709	-0.428432	0.0385557	-0.489169	0.0561646	-0.066927	0.799599	-0.289596	0.462614	0.106395	0.981193	-0.400186	0.175581	0.0825134	0.916435	0.114254	0.688047	0.158498	0.787531	-0.0893451	0.892953	0.00220486	0.996705	0.0775959	0.929098	-0.310375	0.270821	0.0179798	0.953981	0.174299	0.637137
FBgn0016053	CG32885	2R	1211	236	323	285	266	336	344	198	221	249	1076	241	301	-0.144632	0.710961	0.163803	0.668122	0.31631	0.186272	-0.397665	0.353098	-0.263379	0.697626	0.672314	0.227677	0.428139	0.521732	-0.00110003	0.999677	-0.281543	0.528047	0.769063	0.116888	0.264954	0.761197	-0.504198	0.380913	-0.144732	0.775065	0.693563	0.150679	-0.621467	0.0154228
FBgn0016054	CG2488	2L	2161	45	45	186	152	32	40	91	99	33	176	132	75	1.53631	3.19926e-07	-0.332842	0.566366	-1.86362	2.73326e-10	0.67556	0.0747156	-0.511595	0.0931818	0.473286	0.460907	0.421676	0.478399	-0.398566	0.29391	0.754319	0.0148688	-0.00240881	NA	0.0549885	0.994746	0.0233799	0.987773	0.842821	0.0520693	-0.364378	0.536512	1.11187	0.00199855
FBgn0016059	CG6446	2R	4269	682	585	756	750	758	654	752	676	659	1499	664	776	0.111909	0.671303	0.047127	0.88867	-0.0642593	0.79517	0.0797072	0.921791	-0.021943	0.998294	0.462626	0.314505	0.368808	0.54801	-0.0373421	0.957702	0.0110902	0.993685	0.341705	0.622125	-0.0166403	0.996169	-0.329416	0.65546	0.0675468	0.864818	0.353036	0.444038	0.0375277	0.943448
FBgn0016070	CG5263	3L	4927	608	558	649	584	685	730	623	644	652	6831	570	831	-0.0510909	0.870336	0.169362	0.539951	0.221413	0.305311	0.033563	0.972792	0.0784431	0.998294	0.544188	0.29745	0.287501	0.546006	0.163445	0.763771	-0.0282402	0.989167	0.328188	0.527756	0.0891964	0.994439	-0.232638	0.621564	0.138588	0.75325	0.436216	0.30166	-0.131934	0.743722
FBgn0016076	CG14029	2L	4068	4663	1764	1338	1339	1357	2571	1609	2264	1482	1823	959	2789	-0.848942	0.101866	-0.426898	0.541943	0.427049	0.431139	-0.288774	0.722356	0.464936	0.0585414	-0.663285	0.260686	-0.258448	0.71778	0.12697	0.86394	-0.0222383	0.99258	-0.290304	0.572028	-0.0219052	0.996169	0.0747217	0.954428	-0.359115	0.622603	0.238177	0.267443	-0.0103211	0.990671
FBgn0016078	CG8804	2R	2026	1452	1809	2187	2176	1619	1491	1885	2254	1626	1564	1957	2011	0.273365	0.204035	-0.169498	0.539951	-0.451683	0.000150414	0.225558	0.665927	-0.0201464	0.998294	-0.201852	0.545588	-0.032355	0.963639	-0.107222	0.715153	0.309925	0.103662	-0.428103	0.169611	-0.0821472	0.982707	0.336687	0.23409	0.158403	0.631204	-0.477404	0.00420027	0.413191	0.0643962
FBgn0016081	CG32045	3L	11408	1896	1621	1863	1846	2645	2095	1791	1717	2107	1829	1959	1758	-0.0547653	0.834094	0.309408	0.172973	0.368345	0.0153575	-0.0781017	0.91569	-0.0260803	0.998294	-0.015062	0.977092	-0.296719	0.449052	0.0243286	0.965584	-0.32308	0.203692	0.0638548	0.935187	0.0474644	0.994746	-0.0266086	0.980357	-0.031338	0.939478	0.0398382	0.910496	-0.388785	0.0704414
FBgn0016119	CG4412	3R	616	8389	8113	6804	7100	5235	5656	7235	7305	5923	5777	5575	6334	-0.374035	0.00364187	-0.682085	3.59911e-05	-0.313291	0.0278424	-0.247312	0.355517	0.108129	0.969207	-0.655152	0.000100459	0.0260524	0.971205	-0.187499	0.364243	0.0979981	0.892185	-0.388679	0.0760786	-0.291412	0.268354	0.0737267	0.919788	-0.564976	0.000724368	-0.287468	0.0676671	0.417567	0.0291758
FBgn0016120	CG6030	3R	950	8973	9673	8333	8674	7872	7547	8141	8201	7875	8160	7618	8518	-0.261741	0.0855532	-0.371005	0.0305536	-0.110766	0.447336	-0.253295	0.37222	-0.00514373	0.998294	-0.389868	0.0405281	-0.0175224	0.974676	-0.0500774	0.919722	0.0443522	0.965006	-0.122186	0.763887	-0.0458822	0.994746	0.0611812	0.929098	-0.312074	0.127446	-0.131222	0.427442	0.102174	0.739797
FBgn0016122	CG10593	2L	3198	163	100	192	160	109	123	168	144	91	256	109	158	0.252093	0.570477	-0.244245	0.613674	-0.511627	0.0962578	0.119963	0.91813	-0.0854871	0.998294	0.122724	0.879439	0.237733	0.804963	-0.251677	0.619716	0.120919	0.938903	0.0132656	0.996562	-0.17783	0.941132	-0.127693	0.929098	-0.0739517	0.917344	-0.062025	0.932858	0.387809	0.356884
FBgn0016123	CG1462	3R	2153	101208	171101	214006	240395	103199	132366	138075	135771	86137	80611	179908	145639	0.554244	0.0420123	-0.284209	0.457695	-0.873315	2.68544e-07	-0.0638697	0.957938	-0.621149	5.29782e-07	-0.802541	0.00716167	-0.516292	0.0424228	-0.409133	0.0167567	0.370624	0.228521	-0.765038	1.39186e-06	0.193361	0.792559	0.914857	1.36687e-07	0.125051	0.806968	-1.43925	6.82135e-30	0.216584	0.551512
FBgn0016126	CG1495	4	3382	272	182	817	714	377	441	509	338	277	535	466	513	1.50508	1.24085e-11	0.687976	0.0235819	-0.828071	8.70177e-06	0.618245	0.0766003	-0.59309	0.0132543	0.504223	0.306141	-0.0767933	0.947176	-0.543057	0.00147843	0.198462	0.745701	-0.124276	0.915423	0.138157	0.970023	0.230945	0.804541	0.904789	0.000766541	-0.804617	0.0156133	0.057593	0.937268
FBgn0016131	CG5072	2R	2026	22	29	41	46	32	41	55	28	38	144	29	41	0.460126	0.403429	0.30494	0.635673	-0.163881	0.794589	0.287161	NA	-0.0069037	0.998294	0.776878	0.175207	0.402427	0.526656	-0.125731	NA	-0.0371746	0.987361	0.342917	NA	-0.11439	0.990049	-0.356409	0.572012	0.229118	0.765818	0.429727	0.449456	0.130386	0.896546
FBgn0016641	CG9856	2R	5069	385	352	449	466	597	444	405	390	454	896	501	481	0.170656	0.525788	0.366464	0.17941	0.199143	0.446534	0.0232242	0.983725	-0.127086	0.992292	0.56067	0.184822	0.207554	0.811906	0.109255	0.838099	-0.0808222	0.953405	0.478384	0.397367	0.236838	0.687021	-0.262467	0.754586	0.284068	0.319068	0.397803	0.353018	-0.334786	0.287372
FBgn0016650	CG7665	3R	3222	703	519	772	765	650	566	722	672	769	622	765	754	0.188621	0.511542	-0.10707	0.762282	-0.301476	0.0831836	0.0932031	0.91813	-0.0781992	0.998294	0.010283	0.98952	0.107504	0.907417	0.00543348	0.993378	0.272666	0.34519	-0.0814609	0.93047	0.0825943	0.980613	0.144406	0.867995	0.189173	0.601812	-0.166195	0.665927	0.208851	0.511459
FBgn0016672	CG3028	3R	1402	904	977	1820	1948	1313	1183	1395	1690	1144	1063	1647	1622	0.84257	8.72926e-09	0.290779	0.171208	-0.55412	1.27267e-05	0.557027	0.0193496	-0.201987	0.779621	0.0448507	0.919784	-0.223735	0.603537	-0.169196	0.465568	0.34315	0.0680626	-0.51447	0.093524	0.0446776	0.994746	0.554208	0.010329	0.655647	0.000224746	-0.772715	6.96097e-06	0.311337	0.243183
FBgn0016684	CG10207	2R	2660	119817	112443	81423	84092	117614	142954	95906	103379	114546	123383	118915	120555	-0.611717	9.09523e-08	0.0641496	0.840698	0.667003	1.47926e-05	-0.280717	0.288224	0.295339	0.0794885	-0.147454	0.482443	-0.19551	0.62117	0.532493	4.37319e-09	-0.127747	0.852972	0.145514	0.685272	0.214996	0.547427	0.0643742	0.89163	-0.0676034	0.804387	0.465809	2.96184e-07	-0.348608	0.179724
FBgn0016685	CG7917	3R	1080	3173	3394	2769	2714	2418	2753	2719	2672	2732	3222	2452	2877	-0.386091	0.00762166	-0.430628	0.0379091	-0.0498315	0.844131	-0.339479	0.1585	0.0253758	0.998294	-0.318549	0.150241	0.110947	0.852133	-0.0171443	0.975663	0.0190144	0.992248	0.0359572	0.958292	-0.0435139	0.994746	-0.091428	0.896845	-0.399133	0.0551441	0.0635308	0.783675	0.0736762	0.866145
FBgn0016687	CG4634	2R	1281	4332	4519	6259	6321	5967	5603	5223	5355	5421	5422	5613	5919	0.36542	0.00674706	0.273322	0.128988	-0.0909041	0.541361	0.160875	0.715879	-0.183681	0.545356	0.104221	0.698452	-0.158386	0.625622	-0.0976724	0.715639	-0.0204523	0.984855	-0.060748	0.917889	0.0857325	0.973395	0.135557	0.750987	0.258765	0.199973	-0.255629	0.0881603	-0.103435	0.741106
FBgn0016691	CG4307	3R	802	14015	13534	10871	11557	9409	9805	11304	10722	10867	10645	10062	11386	-0.422536	0.000840359	-0.607432	0.000118111	-0.188374	0.208241	-0.378715	0.0564356	0.0236645	0.998294	-0.521995	0.0026317	0.0830714	0.878546	-0.0392662	0.93759	0.127172	0.819009	-0.125606	0.766806	-0.0637764	0.993888	0.0465586	0.947389	-0.459676	0.00773157	-0.104493	0.600407	0.208253	0.39545
FBgn0016693	CG6148	3R	2679	5827	8092	6139	6436	4967	5204	5643	7423	5297	5209	5758	5892	-0.269397	0.28359	-0.529729	0.0295541	-0.269417	0.0518296	-0.145268	0.863785	0.0909697	0.998294	-0.550484	0.0390738	-0.0265111	0.967791	-0.0830227	0.789486	0.163076	0.655436	-0.372386	0.306307	-0.169479	0.886459	0.191454	0.571214	-0.3501	0.221609	-0.297867	0.0546545	0.357178	0.200615
FBgn0016694	CG17888	3L	6855	10558	7357	8740	8146	11062	11450	8367	9913	10157	8322	9866	8747	-0.206617	0.436825	0.217029	0.463759	0.437417	0.000302844	-0.0424883	0.96999	0.147628	0.928004	-0.119285	0.773234	-0.319588	0.349815	0.152197	0.55358	-0.267422	0.282422	-0.0702339	0.9309	-0.00516221	0.996482	0.053235	0.954428	-0.0519726	0.908448	0.083864	0.795626	-0.265607	0.318307
FBgn0016696	CG4268	3L	4391	2577	1923	2742	2756	2699	2590	2748	2196	2797	3268	2657	2609	0.150732	0.563662	0.123936	0.678981	-0.0264256	0.8979	0.0459909	0.966734	-0.0887551	0.998294	0.22821	0.460138	0.112096	0.797966	-0.0370095	0.936036	-0.0219557	0.984631	0.174724	0.726889	0.0535557	0.994746	-0.133788	0.775544	0.109116	0.766588	0.0859304	0.687672	-0.0730865	0.869535
FBgn0016697	CG10938	2R	884	2138	2125	1659	1604	1625	1568	1554	1583	1693	2039	1640	1933	-0.508265	0.000195102	-0.508902	0.00215804	-0.00205755	0.993247	-0.48419	0.0125149	-0.0042569	0.998294	-0.366006	0.0996047	0.134906	0.771473	0.139295	0.681547	0.129855	0.835962	0.133935	0.788879	0.138444	0.90911	-0.00237064	0.999341	-0.353935	0.100786	0.134205	0.560569	-0.00372289	0.991171
FBgn0016698	CG3289	2L	1393	365	392	458	414	532	488	398	402	486	465	459	455	0.0659538	0.848477	0.309027	0.221197	0.24433	0.257125	-0.00341049	0.997619	-0.0600625	0.998294	0.131629	0.764977	-0.148319	0.834997	0.078704	0.907918	-0.153569	0.80437	0.128637	0.875583	0.139098	0.929566	-0.00217529	0.999341	0.14834	0.678535	0.0705992	0.873405	-0.308636	0.260403
FBgn0016700	CG3320	3R	1804	8297	7385	9121	8708	8199	7114	9096	7788	7826	7361	7326	8426	0.0506717	0.822517	-0.138076	0.537205	-0.18964	0.158277	0.0211921	0.98257	-0.0246098	0.998294	-0.21804	0.383179	-0.0763176	0.89818	-0.145408	0.568707	0.0230402	0.984855	-0.231055	0.543152	-0.116772	0.949362	0.096909	0.881626	-0.102939	0.735589	-0.268001	0.121648	0.157022	0.613629
FBgn0016701	CG4921	2R	1316	4288	3811	4429	4284	4375	4165	4545	3894	4616	4134	4198	4530	-0.0272879	0.914079	-0.0278459	0.920561	-2.18484e-05	0.99994	-0.0218202	0.98257	0.00463517	0.998294	-0.0647364	0.858616	-0.0323855	0.963424	0.0237828	0.961278	0.0129923	0.993536	-0.0393081	0.962322	0.0160469	0.996169	0.0438719	0.956838	-0.00514598	0.990788	-0.0363912	0.903684	0.00352404	0.991919
FBgn0016715	CG3200	3L	883	412	612	917	915	909	946	762	860	656	640	867	1067	0.653736	0.0082087	0.699807	0.00950499	0.0473914	0.852841	0.470532	0.188801	-0.106769	0.998294	0.134712	0.784556	-0.525649	0.0486014	0.0882707	0.876094	0.0350602	0.979981	-0.373167	0.35269	0.18802	0.853918	0.535438	0.061205	0.725157	0.0108357	-0.51141	0.0161052	-0.163348	0.657414
FBgn0016726	CG10071	2R	389	7710	6117	8326	8111	7422	7353	8088	6603	8019	7304	7501	7846	0.113427	0.634998	-0.00731592	0.983318	-0.121988	0.404634	0.00417922	0.996321	-0.0981394	0.998294	-0.0294245	0.948186	-0.0175829	0.979848	-0.072575	0.826351	0.0341694	0.975089	-0.0316533	0.97174	0.0291043	0.996169	0.0504832	0.946911	0.0366654	0.925664	-0.140456	0.533207	0.0107877	0.98329
FBgn0016754	CG13598	3R	6427	426	404	516	502	462	440	475	481	393	463	435	489	0.154206	0.554365	0.0137952	0.970106	-0.140362	0.554403	0.107181	0.887917	-0.0329422	0.998294	-0.131898	0.754703	-0.131917	0.870612	-0.101845	0.856741	0.014936	0.993536	-0.228602	0.691222	-0.0696719	0.994439	0.140222	0.870728	0.0385682	0.932557	-0.277126	0.371336	0.0997086	0.819126
FBgn0016756	CG5486	3L	5493	5082	5525	6346	6343	6958	6100	6422	6003	6393	6477	5627	5926	0.121036	0.525512	0.186295	0.382232	0.0671549	0.691159	0.132478	0.807249	0.019771	0.998294	0.0900784	0.748765	-0.0883039	0.858095	-0.107045	0.66689	-0.179088	0.540416	-0.0464541	0.938024	-0.125567	0.896388	-0.0942962	0.850888	0.00800288	0.986094	-0.0273333	0.901637	-0.0466116	0.906892
FBgn0016762	CG12273	2R	1230	216	220	283	298	176	196	242	236	219	198	206	246	0.263207	0.358951	-0.308506	0.360887	-0.570326	0.0165087	0.0414909	0.970893	-0.181938	0.936154	-0.208959	0.678315	0.0664476	0.955613	-0.271323	0.446826	0.201368	0.793551	-0.227912	0.768557	-0.0899083	0.994081	0.119116	0.929098	-0.0572524	0.912269	-0.442717	0.234429	0.344099	0.347532
FBgn0016794	CG1044	3L	4666	525	1025	430	510	411	354	410	363	346	748	266	416	-0.755531	0.0208482	-1.00569	0.00212203	-0.257474	0.289483	-0.793885	0.0139635	-0.185926	0.915974	-0.552255	0.275369	0.291702	0.687142	-0.322957	0.387758	-0.136805	0.900541	0.266758	0.752667	-0.157823	0.957537	-0.354517	0.630982	-1.08784	0.00190068	0.112728	0.854383	0.0356725	0.953527
FBgn0016797	CG9739	3L	5696	2470	2482	2922	2610	2754	2741	2869	2809	2854	2441	3054	2630	0.0247641	0.926579	0.044107	0.866983	0.0199513	0.934899	0.105587	0.854063	0.0810431	0.998294	-0.0777473	0.836351	-0.111313	0.869325	0.0567283	0.926353	0.028125	0.982683	-0.177003	0.738897	-0.0261381	0.996169	0.134006	0.853628	0.0816647	0.803995	-0.0991544	0.762378	0.06544	0.859872
FBgn0016917	CG4257	3R	4200	9842	10031	9435	9924	10177	8475	9758	9180	9467	9159	8829	7709	-0.168807	0.287778	-0.195724	0.346095	-0.0276359	0.899112	-0.142597	0.753996	0.0184375	0.998294	-0.266857	0.223434	-0.0671212	0.916143	-0.18866	0.403144	-0.169305	0.699529	-0.115245	0.802171	-0.204156	0.690563	-0.106622	0.857715	-0.365459	0.0608863	-0.0995808	0.636212	0.044828	0.917941
FBgn0016920	CG11020	2L	6665	88	75	28	21	37	43	83	31	31	29	35	30	-1.4653	9.42518e-05	-0.944299	0.0189561	0.522499	0.313684	-0.321467	0.687087	0.362486	0.395496	-1.03543	0.0383404	-0.186227	0.867098	0.157561	NA	-0.149457	0.915355	-0.363357	NA	-0.320096	0.741774	0.0538872	0.969824	-1.13563	0.00328025	0.10462	0.885624	0.33391	0.666843
FBgn0016926	CG4710	2L	2130	8539	12145	4321	4289	5981	9426	4573	11812	5503	4902	3824	5134	-1.32938	2.22488e-12	-0.474241	0.168046	0.716688	0.0648313	-0.143976	0.900948	0.246132	0.797963	-1.08045	6.66014e-06	-0.532861	0.138505	0.0690959	0.919775	-0.607927	0.0286424	-0.319441	0.705157	-0.273561	0.798156	-0.14201	0.849807	-1.21483	3.78805e-07	0.218949	0.321881	0.0498016	0.967809
FBgn0016930	CG4551	2L	4681	525	758	467	494	575	556	565	642	551	601	546	526	-0.514572	0.0511408	-0.270924	0.415467	0.254588	0.206098	-0.141826	0.872758	0.319271	0.304625	-0.306718	0.44702	-0.0441389	0.960385	0.158593	0.679839	-0.0837144	0.93672	-0.149374	0.826209	-0.174977	0.870265	-0.0390671	0.970423	-0.344355	0.32239	0.194034	0.541657	0.109159	0.806546
FBgn0016970	CG13951	2R	820	66	47	59	57	69	65	76	49	80	122	59	61	-0.0760383	0.910285	0.118504	0.8475	0.196455	0.702961	0.0375274	0.982375	0.0752924	0.998294	0.435141	0.469757	0.28238	0.739113	0.0395447	NA	-0.1071	0.954029	0.31451	NA	-0.0495058	0.995514	-0.339855	0.666371	-0.0198591	0.984905	0.479729	0.358683	-0.0623919	0.950596
FBgn0016977	CG18497	2L	20622	4685	3924	5288	4498	6508	5325	5519	4805	5386	4720	4867	4472	0.0500864	0.863164	0.338697	0.108042	0.291164	0.0769393	0.162154	0.764099	0.112766	0.992359	0.0497639	0.901835	-0.26744	0.459414	-0.0401171	0.94581	-0.32269	0.135261	-0.114295	0.858262	-0.157473	0.856721	-0.0553504	0.947389	0.00484253	0.992592	0.00300879	0.992787	-0.16433	0.609361
FBgn0016978	CG8749	2L	2948	836	751	1048	990	1195	1183	945	761	1012	1174	1181	1040	0.220216	0.278607	0.463319	0.01737	0.246068	0.129882	0.0180621	0.988882	-0.173665	0.901937	0.257566	0.376867	-0.18376	0.662487	0.132577	0.726355	-0.103998	0.89121	0.226019	0.655175	0.299049	0.492425	0.0737542	0.934282	0.354512	0.128885	0.0459421	0.885561	-0.432813	0.064572
[truncated: 6,336 more rows]

## Sheet: ASE S26xS58
FBgn	hyb_S26_1	hyb_S58_1	hyb_S26_2	hyb_S58_2	par_S26_1	par_S26_2	par_S58_1	par_S58_2	hyb_log2(S26/S58)	hyb_padj	par_log2(S26/S58)	par_padj
[truncated: 3,251 more rows]

[truncated: 5 more sheets: ASE S26xZ418, ASE S58xZ418, ASE S26xS58 (sub-sampled), ASE S26xZ418 (sub-sampled), ASE S58xZ418 (sub-sampled)]
